# Supplementary material
Source: Research Square preprint supplement (doi:10.21203/rs.3.rs-9826575/v1)
Supplement: Supplementary file 1 [file 6ad803b03e692a792871d171.xlsx]

## Sheet: All AEs
Year	Report Type	Total Reports	5-DAY	30-DAY	Expedited	Non-Expedited	Direct
Total Reports		23956805	5282	183376	13297067	9675884	795196
2024		2110318	1874	75916	1161962	812441	58125
2023		2212106	1249	59655	1245058	837512	68632
2022		2359921	420	24225	1306570	950627	78079
2021		2343884	1723	14830	1386836	867946	72549
2020		2210950	12	8744	1241689	881945	78560
2019		2174978	4	6	1214756	854824	105388
2018		2139668	-	-	1154836	897281	87551
2017		1804746	-	-	941530	801186	62030
2016		1683302	-	-	863199	769112	50991
2015		1719758	-	-	833079	845020	41659
2014		1198415	-	-	741464	422721	34230
2013		1068583	-	-	631148	409045	28390
2012		930176	-	-	574940	326224	29012

## Sheet: AEs list
		Case ID	Suspect Product Names	Suspect Product Active Ingredients	Reason for Use	Reactions	Serious	Outcomes	Sex	Event Date	Latest FDA Received Date	Case Priority	Patient Age	Patient Weight	Sender	Reporter Type	Report Source	Concomitant Product Names	Latest Manufacturer Received Date	Initial FDA Received Date	Country where Event occurred	Reported to Manufacturer?	Manufacturer Control Number	Literature Reference	Compounded Flag
1	1	9507465	Ammonia N 13	Ammonia N-13	Coronary Artery Disease	Death	Serious	Hospitalized;Life Threatening;Died	Female	15-AUG-2013	04-SEP-2013	Expedited	64 YR	98.7 KG	Siemens	Healthcare Professional	Health Professional	Apresoline Hydrochloride;Glucotrol;Rocaltrol;Aspirin;Lasix;Renvela;Dilacor Xr;Zyrtec;Xalatan;Lipitor;Nexium;Normodyne	26-AUG-2013	04-SEP-2013	Not Specified	Not Specified	PC0000748	-	-
2	2	9507313	Ammonia N 13	Ammonia N-13	Coronary Artery Disease	Acute Myocardial Infarction	Serious	Hospitalized;Life Threatening	Female	19-AUG-2013	04-SEP-2013	Expedited	44 YR	117 KG	Siemens	Healthcare Professional	Health Professional	Pepcid;Ultram;Imdur;Nitrostat;Klonopin;Elavil;Aspirin;Ventolin;Flonase;Lipitor;Prinivil;Synthroid	26-AUG-2013	04-SEP-2013	Not Specified	Not Specified	PC0000746	-	-
3	1	12623404	-	Sodium Fluoride F-18	Imaging Procedure	Drug Ineffective	Non-Serious	Non-Serious	Not Specified	10-SEP-2015	04-AUG-2016	Non-Expedited	Not Specified	Not Specified	Cardinal Health	Healthcare Professional	Not Specified	-	10-SEP-2015	04-AUG-2016	US	Not Specified	US-CARDINAL HEALTH 414, LLC-1055890	-	-
4	2	11905798	-	Sodium Fluoride F-18	Positron Emission Tomogram	Hypersensitivity	Serious	Other Outcomes	Male	22-DEC-2015	27-APR-2016	Expedited	63 YR	84.09 KG	Petnet	Healthcare Professional	Not Specified	-	12-APR-2016	07-JAN-2016	US	Not Specified	PC0000774	-	-
5	1	24259051	Posluma	Flotufolastat F-18	Positron Emission Tomogram	Positron Emission Tomogram Abnormal	Non-Serious	Non-Serious	Male	12-JUN-2024	02-DEC-2024	Expedited	Not Specified	Not Specified	Bracco	Healthcare Professional	Not Specified	-	17-SEP-2024	28-AUG-2024	US	Not Specified	US-BRACCO-2024US03468	-	-
6	2	24557908	Posluma	Flotufolastat F-18	Positron Emission Tomogram	Haemorrhage Urinary Tract	Serious	Other Outcomes	Male	21-OCT-2024	28-OCT-2024	Expedited	56 YR	Not Specified	Bracco	Consumer	Not Specified	-	22-OCT-2024	28-OCT-2024	US	Not Specified	US-BRACCO-2024US06694	-	-
7	3	24259052	Posluma	Flotufolastat F-18	Positron Emission Tomogram	Positron Emission Tomogram Abnormal	Non-Serious	Non-Serious	Male	23-MAY-2024	28-AUG-2024	Expedited	Not Specified	Not Specified	Bracco	Healthcare Professional	Not Specified	-	23-MAY-2024	28-AUG-2024	US	Not Specified	US-BRACCO-2024US03480	-	-
8	4	23987351	Posluma	Flotufolastat F-18	Positron Emission Tomogram	Drug Effect Less Than Expected	Non-Serious	Non-Serious	Male	08-AUG-2023	18-JUN-2024	Expedited	Not Specified	Not Specified	Bracco	Healthcare Professional	Not Specified	-	09-AUG-2023	18-JUN-2024	US	Not Specified	US-BRACCO-2023US04007	-	-
9	5	23987322	Posluma	Flotufolastat F-18	Positron Emission Tomogram	Positron Emission Tomogram Abnormal	Non-Serious	Non-Serious	Male	26-MAR-2024	18-JUN-2024	Expedited	Not Specified	Not Specified	Bracco	Consumer	Not Specified	-	04-APR-2024	18-JUN-2024	US	Not Specified	US-BRACCO-2024US02814	-	-
10	6	23987321	Posluma	Flotufolastat F-18	Diagnostic Procedure	False Positive Investigation Result	Non-Serious	Non-Serious	Male	-	18-JUN-2024	Expedited	Not Specified	Not Specified	Bracco	Healthcare Professional	Not Specified	-	17-JAN-2024	18-JUN-2024	US	Not Specified	US-BRACCO-2024US00279	-	-
11	7	23987320	Posluma	Flotufolastat F-18	Positron Emission Tomogram	Therapeutic Response Unexpected	Non-Serious	Non-Serious	Male	19-SEP-2023	18-JUN-2024	Expedited	Not Specified	Not Specified	Bracco	Healthcare Professional	Not Specified	-	27-SEP-2023	18-JUN-2024	US	Not Specified	US-BRACCO-2023US05028	-	-
12	8	23987319	Posluma	Flotufolastat F-18	Positron Emission Tomogram	Drug Effect Less Than Expected	Non-Serious	Non-Serious	Male	09-AUG-2023	18-JUN-2024	Expedited	Not Specified	Not Specified	Bracco	Healthcare Professional	Not Specified	-	09-AUG-2023	18-JUN-2024	US	Not Specified	US-BRACCO-2023US04088	-	-
13	9	23987318	Posluma	Flotufolastat F-18	Positron Emission Tomogram	Drug Effect Less Than Expected	Non-Serious	Non-Serious	Male	13-JUL-2023	18-JUN-2024	Expedited	Not Specified	Not Specified	Bracco	Healthcare Professional	Not Specified	-	16-AUG-2023	18-JUN-2024	US	Not Specified	US-BRACCO-2023US04090	-	-
14	10	23987317	Posluma	Flotufolastat F-18	Positron Emission Tomogram	Drug Effect Less Than Expected	Non-Serious	Non-Serious	Male	27-JUL-2023	18-JUN-2024	Expedited	Not Specified	Not Specified	Bracco	Healthcare Professional	Not Specified	-	16-AUG-2023	18-JUN-2024	US	Not Specified	US-BRACCO-2023US04091	-	-
15	11	23987316	Posluma	Flotufolastat F-18	Positron Emission Tomogram	Drug Effect Less Than Expected	Non-Serious	Non-Serious	Male	09-AUG-2023	18-JUN-2024	Expedited	Not Specified	Not Specified	Bracco	Healthcare Professional	Not Specified	-	09-AUG-2023	18-JUN-2024	US	Not Specified	US-BRACCO-2023US04089	-	-
16	12	23987314	Posluma	Flotufolastat F-18	Positron Emission Tomogram	Dysuria;Drug Effect Less Than Expected	Non-Serious	Non-Serious	Male	-	18-JUN-2024	Expedited	Not Specified	Not Specified	Bracco	Consumer	Not Specified	-	18-AUG-2023	18-JUN-2024	US	Not Specified	US-BRACCO-2023US03649	-	-
17	1	24340520	Neuraceq	Florbetaben F-18	Dementia Alzheimer's Type	Gait Disturbance;Fatigue;Dizziness;Feeling Abnormal	Serious	Other Outcomes	Male	18-SEP-2024	19-SEP-2024	Direct	82 YR	73.35 KG	Fda-Ctu	Consumer	Not Specified	-	-	19-SEP-2024	Not Specified	Y	-	-	-
18	2	24282656	Neuraceq	Florbetaben F-18	Imaging Procedure	Nausea;Chills;Influenza Like Illness;Dyspnoea;Hyperhidrosis;Asthenia	Serious	Other Outcomes	Female	AUG-2024	04-SEP-2024	Expedited	82 YR	Not Specified	Life Molecular Imaging	Healthcare Professional	Not Specified	-	26-AUG-2024	04-SEP-2024	GB	Not Specified	GB-Life Molecular Imaging Ltd-2161142	-	-
19	3	23091139	Neuraceq	Florbetaben F-18;Aducanumab	Dementia Alzheimer's Type;Positron Emission Tomogram	Headache;Amyloid Related Imaging Abnormality-Oedema/Effusion;Nausea	Non-Serious	Non-Serious	Female	11-OCT-2023	30-NOV-2023	Expedited	65 YR	62.2 KG	Biogen	Healthcare Professional	Not Specified	Fluoxetine	24-NOV-2023	20-OCT-2023	FR	Not Specified	FR-BIOGEN-2023BI01230906	-	-
20	4	22838195	Neuraceq	Florbetaben F-18	Positron Emission Tomogram	Burning Sensation;Discomfort;Injection Site Pain;Chest Discomfort;Dyspnoea	Non-Serious	Non-Serious	Male	16-AUG-2023	17-AUG-2023	Direct	60 YR	100.8 KG	Fda-Ctu	Consumer	Not Specified	Vitamin B1;Breo Ellipta;Vitamin B12;Metformin;Probiotics Nos;Atorvastatin	-	17-AUG-2023	Not Specified	Not Specified	-	-	-
21	5	13970179	-	Quetiapine;Ropinirole;Florbetaben F-18;Carbidopa\Entacapone\Levodopa	Hallucination;Parkinson's Disease;Product Used For Unknown Indication	Hallucination, Visual;Depression;Anxiety;Sleep Disorder;Sedation Complication;Behaviour Disorder;Apathy	Serious	Hospitalized	Female	-	14-SEP-2017	Expedited	75 YR	Not Specified	Sandoz	Healthcare Professional	Not Specified	-	07-SEP-2017	14-SEP-2017	KR	Not Specified	PHHY2016KR075997	Lim HK, Um YH, Kim TW, Jeong J, Seo H, Han J et al.. Visual Hallucinations and Amyloid Deposition in Parkinson's Disease Dementia: A Case Report. PSYCHIATRY INVESTIGATION. 2016;13(3):364-9	-
22	6	11087247	Neuraceq	Florbetaben F-18	Imaging Procedure	Dysgeusia;Injection Site Pain	Non-Serious	Non-Serious	Female	09-OCT-2014	30-APR-2015	Expedited	52 YR	46 KG	Piramal	Not Specified	Company Representative ,Health Professional ,Foreign	-	28-NOV-2014	30-APR-2015	Not Specified	Not Specified	2014-PIB-000299	-	-
23	1	24764027	Cerianna	Fluoroestradiol F-18	Diagnostic Procedure	Drug Ineffective;No Adverse Event	Non-Serious	Non-Serious	Not Specified	12-SEP-2024	23-DEC-2024	Non-Expedited	Not Specified	Not Specified	Ge Healthcare	Healthcare Professional	Not Specified	-	21-OCT-2024	23-DEC-2024	US	Not Specified	US-GE HEALTHCARE-2024CSU012264	-	-
24	2	23996411	Cerianna	Fluoroestradiol F-18	Positron Emission Tomogram	False Negative Investigation Result;No Adverse Event	Non-Serious	Non-Serious	Female	16-MAY-2024	06-AUG-2024	Non-Expedited	Not Specified	Not Specified	Ge Healthcare	Healthcare Professional	Not Specified	-	18-JUL-2024	20-JUN-2024	US	Not Specified	US-GE HEALTHCARE-2024CSU006331	-	-
25	3	23952758	Cerianna	Fluoroestradiol F-18	Diagnostic Procedure	False Negative Investigation Result	Non-Serious	Non-Serious	Female	14-MAY-2024	06-AUG-2024	Non-Expedited	45 YR	Not Specified	Ge Healthcare	Healthcare Professional	Not Specified	-	18-JUL-2024	07-JUN-2024	US	Not Specified	US-GE HEALTHCARE-2024CSU005525	-	-
26	4	23423649	Cerianna	Fluoroestradiol F-18	Chemotherapy;Cough;Hypertension;Local Anaesthesia;Nausea;Pain;Positron Emission Tomogram	Hyperhidrosis;Hot Flush	Non-Serious	Non-Serious	Female	03-JAN-2024	19-JAN-2024	Non-Expedited	Not Specified	113 KG	Ge Healthcare	Healthcare Professional	Not Specified	Zofran;Klor-Con;Gabapentin;Apresoline Hydrochloride;Methocarbamol;Protonix;Warfarin;Oxycodone And Acetaminophen;Hydrochlorothiazide;Mirtazapine;Ribociclib;Amlodipine;Ferrous Sulfate;Carvedilol;Emla;Robitussin Ac;Compazine;Dilaudid;Enhertu	04-JAN-2024	19-JAN-2024	US	Not Specified	US-GE HEALTHCARE-2024CSU000241	-	-
27	5	22951173	Cerianna	Fluoroestradiol F-18	Invasive Lobular Breast Carcinoma;Positron Emission Tomogram	False Negative Investigation Result	Non-Serious	Non-Serious	Female	17-FEB-2023	27-DEC-2023	Non-Expedited	Not Specified	Not Specified	Ge Healthcare	Healthcare Professional	Not Specified	Palbociclib;Lorazepam;Fulvestrant	15-DEC-2023	17-SEP-2023	US	Not Specified	US-GE HEALTHCARE-2023CSU007773	-	-
28	6	22924757	Cerianna	Fluoroestradiol F-18	Breast Cancer Female;Positron Emission Tomogram	No Adverse Event;Drug Ineffective	Non-Serious	Non-Serious	Female	17-AUG-2023	17-OCT-2023	Non-Expedited	Not Specified	53.968 KG	Ge Healthcare	Healthcare Professional	Not Specified	-	04-OCT-2023	08-SEP-2023	US	Not Specified	US-GE HEALTHCARE-2023CSU007261	-	-
29	7	22117018	Cerianna	Fluoroestradiol F-18	Breast Cancer Female;Neoadjuvant Therapy;Positron Emission Tomogram	No Adverse Event;False Negative Investigation Result	Non-Serious	Non-Serious	Female	05-AUG-2022	20-MAR-2023	Non-Expedited	Not Specified	Not Specified	Ge Healthcare	Healthcare Professional	Not Specified	Verzenio;Letrozole	16-FEB-2023	20-MAR-2023	US	Not Specified	US-GE HEALTHCARE-2023CSU000533	-	-
30	1	24791971	Vizamyl	Flutemetamol F-18	Diagnostic Procedure	Flushing;Dizziness	Non-Serious	Non-Serious	Female	02-DEC-2024	31-DEC-2024	Non-Expedited	Not Specified	45 KG	Ge Healthcare	Healthcare Professional	Not Specified	-	03-DEC-2024	31-DEC-2024	US	Not Specified	US-GE HEALTHCARE-2024CSU014149	-	-
31	2	24770811	Vizamyl	Flutemetamol F-18	Diagnostic Procedure	Nausea;Blood Pressure Increased;Flushing;Photopsia;Hyperhidrosis	Non-Serious	Non-Serious	Not Specified	01-NOV-2024	24-DEC-2024	Non-Expedited	Not Specified	Not Specified	Ge Healthcare	Healthcare Professional	Not Specified	-	01-NOV-2024	24-DEC-2024	US	Not Specified	US-GE HEALTHCARE-2024CSU012774	-	-
32	3	24770809	Vizamyl	Flutemetamol F-18	Diagnostic Procedure	Hot Flush;Headache;Dyspnoea	Non-Serious	Non-Serious	Not Specified	01-NOV-2024	24-DEC-2024	Non-Expedited	Not Specified	Not Specified	Ge Healthcare	Healthcare Professional	Not Specified	-	02-NOV-2024	24-DEC-2024	US	Not Specified	US-GE HEALTHCARE-2024CSU012789	-	-
33	4	24770808	Vizamyl	Flutemetamol F-18	Positron Emission Tomogram	Chest Discomfort	Non-Serious	Non-Serious	Female	07-NOV-2024	24-DEC-2024	Non-Expedited	Not Specified	64 KG	Ge Healthcare	Healthcare Professional	Not Specified	-	07-NOV-2024	24-DEC-2024	US	Not Specified	US-GE HEALTHCARE-2024CSU013008	-	-
34	5	24770807	Vizamyl	Flutemetamol F-18	Positron Emission Tomogram	Flushing	Non-Serious	Non-Serious	Female	23-OCT-2024	24-DEC-2024	Non-Expedited	Not Specified	68 KG	Ge Healthcare	Healthcare Professional	Not Specified	-	25-OCT-2024	24-DEC-2024	US	Not Specified	US-GE HEALTHCARE-2024CSU012395	-	-
35	6	24770805	Vizamyl	Flutemetamol F-18	Diagnostic Procedure	Flushing;Erythema	Non-Serious	Non-Serious	Male	04-NOV-2024	24-DEC-2024	Non-Expedited	Not Specified	Not Specified	Ge Healthcare	Healthcare Professional	Not Specified	-	05-NOV-2024	24-DEC-2024	US	Not Specified	US-GE HEALTHCARE-2024CSU012898	-	-
36	7	24770802	Vizamyl	Flutemetamol F-18	Positron Emission Tomogram	Flushing;Dyspnoea	Non-Serious	Non-Serious	Female	07-NOV-2024	24-DEC-2024	Non-Expedited	Not Specified	75 KG	Ge Healthcare	Healthcare Professional	Not Specified	-	07-NOV-2024	24-DEC-2024	US	Not Specified	US-GE HEALTHCARE-2024CSU013009	-	-
37	8	24770801	Vizamyl	Flutemetamol F-18	Diagnostic Procedure	Dyspnoea;Chest Discomfort	Non-Serious	Non-Serious	Female	01-NOV-2024	24-DEC-2024	Non-Expedited	Not Specified	Not Specified	Ge Healthcare	Healthcare Professional	Not Specified	-	02-NOV-2024	24-DEC-2024	US	Not Specified	US-GE HEALTHCARE-2024CSU012788	-	-
38	9	24770800	Vizamyl	Flutemetamol F-18	Positron Emission Tomogram	Muscle Spasms	Non-Serious	Non-Serious	Female	06-NOV-2024	24-DEC-2024	Non-Expedited	Not Specified	67.1 KG	Ge Healthcare	Healthcare Professional	Not Specified	-	08-NOV-2024	24-DEC-2024	US	Not Specified	US-GE HEALTHCARE-2024CSU013039	-	-
39	10	24765740	Vizamyl	Flutemetamol F-18	Positron Emission Tomogram	Headache;Flushing;Heart Rate Increased;Back Pain;Dizziness	Non-Serious	Non-Serious	Female	24-OCT-2024	23-DEC-2024	Non-Expedited	Not Specified	56.7 KG	Ge Healthcare	Healthcare Professional	Not Specified	-	24-OCT-2024	23-DEC-2024	US	Not Specified	US-GE HEALTHCARE-2024CSU012387	-	-
40	11	24764025	Vizamyl	Flutemetamol F-18	Diagnostic Procedure	Nausea;Vomiting;Dizziness;Flushing	Non-Serious	Non-Serious	Female	10-OCT-2024	23-DEC-2024	Non-Expedited	Not Specified	45 KG	Ge Healthcare	Healthcare Professional	Not Specified	-	11-OCT-2024	23-DEC-2024	US	Not Specified	US-GE HEALTHCARE-2024CSU011646	-	-
41	12	24703269	Vizamyl	Flutemetamol F-18	Positron Emission Tomogram	Chest Pain;Sensation Of Foreign Body;Flushing;Back Pain	Non-Serious	Non-Serious	Female	11-SEP-2024	22-DEC-2024	Non-Expedited	68 YR	100.68 KG	Ge Healthcare	Healthcare Professional	Not Specified	-	05-DEC-2024	05-DEC-2024	US	Not Specified	US-GE HEALTHCARE-2024CSU010510	-	-
42	13	24759053	Vizamyl	Flutemetamol F-18	Positron Emission Tomogram	Dyspnoea;Anxiety;Abdominal Discomfort;Flushing;Feeling Hot	Non-Serious	Non-Serious	Female	24-SEP-2024	20-DEC-2024	Non-Expedited	Not Specified	47.619 KG	Ge Healthcare	Healthcare Professional	Not Specified	Buspirone;Lexapro;Protonix;Flonase;Vitamins;Gabapentin;Hydroxyzine Hydrochloride;Lasix;Lactulose;Potassium Chloride;Aldactone;Saline;Lorazepam	24-SEP-2024	20-DEC-2024	US	Not Specified	US-GE HEALTHCARE-2024CSU010968	-	-
43	14	24752627	Vizamyl	Flutemetamol F-18	Diagnostic Procedure	Feeling Hot;Chest Pain;Flushing;Hyperhidrosis;Dyspnoea	Non-Serious	Non-Serious	Female	02-OCT-2024	19-DEC-2024	Non-Expedited	Not Specified	108 KG	Ge Healthcare	Healthcare Professional	Not Specified	-	02-OCT-2024	19-DEC-2024	US	Not Specified	US-GE HEALTHCARE-2024CSU011203	-	-
44	15	24745138	Vizamyl	Flutemetamol F-18	Diagnostic Procedure	Pain	Non-Serious	Non-Serious	Female	19-AUG-2024	17-DEC-2024	Non-Expedited	Not Specified	Not Specified	Ge Healthcare	Healthcare Professional	Not Specified	-	27-SEP-2024	17-DEC-2024	US	Not Specified	US-GE HEALTHCARE-2024CSU011087	-	-
45	16	24745133	Vizamyl	Flutemetamol F-18	Diagnostic Procedure	Presyncope;Dyspnoea;Pain;Flushing;Back Pain	Non-Serious	Non-Serious	Female	30-AUG-2024	17-DEC-2024	Non-Expedited	Not Specified	Not Specified	Ge Healthcare	Healthcare Professional	Not Specified	-	27-SEP-2024	17-DEC-2024	US	Not Specified	US-GE HEALTHCARE-2024CSU011086	-	-
46	17	24726642	Vizamyl	Flutemetamol F-18	Diagnostic Procedure	Feeling Hot;Hyperhidrosis;Erythema	Non-Serious	Non-Serious	Male	13-SEP-2024	12-DEC-2024	Non-Expedited	Not Specified	Not Specified	Ge Healthcare	Healthcare Professional	Not Specified	Sodium Chloride	27-SEP-2024	12-DEC-2024	US	Not Specified	US-GE HEALTHCARE-2024CSU011085	-	-
47	18	24723951	Vizamyl	Flutemetamol F-18	Diagnostic Procedure	Dyspnoea;Dizziness;Chest Pain	Non-Serious	Non-Serious	Female	14-AUG-2024	11-DEC-2024	Non-Expedited	Not Specified	Not Specified	Ge Healthcare	Healthcare Professional	Not Specified	-	27-SEP-2024	11-DEC-2024	US	Not Specified	US-GE HEALTHCARE-2024CSU011089	-	-
48	19	24723950	Vizamyl	Flutemetamol F-18	Diagnostic Procedure	Flushing;Dyspnoea	Non-Serious	Non-Serious	Not Specified	14-AUG-2024	11-DEC-2024	Non-Expedited	Not Specified	Not Specified	Ge Healthcare	Healthcare Professional	Not Specified	-	27-SEP-2024	11-DEC-2024	US	Not Specified	US-GE HEALTHCARE-2024CSU011088	-	-
49	20	24723949	Vizamyl	Flutemetamol F-18	Diagnostic Procedure	Abdominal Pain Upper;Back Pain	Non-Serious	Non-Serious	Female	18-SEP-2024	11-DEC-2024	Non-Expedited	Not Specified	Not Specified	Ge Healthcare	Healthcare Professional	Not Specified	-	27-SEP-2024	11-DEC-2024	US	Not Specified	US-GE HEALTHCARE-2024CSU011084	-	-
50	21	24723948	Vizamyl	Flutemetamol F-18	Diagnostic Procedure	Back Pain;Flushing	Non-Serious	Non-Serious	Not Specified	24-SEP-2024	11-DEC-2024	Non-Expedited	Not Specified	Not Specified	Ge Healthcare	Healthcare Professional	Not Specified	-	27-SEP-2024	11-DEC-2024	US	Not Specified	US-GE HEALTHCARE-2024CSU011083	-	-
51	22	24718935	Vizamyl	Flutemetamol F-18	Diagnostic Procedure	Headache;Nausea;Back Pain;Hot Flush	Non-Serious	Non-Serious	Female	26-SEP-2024	10-DEC-2024	Non-Expedited	Not Specified	Not Specified	Ge Healthcare	Healthcare Professional	Not Specified	-	27-SEP-2024	10-DEC-2024	US	Not Specified	US-GE HEALTHCARE-2024CSU011082	-	-
52	23	24707939	Vizamyl	Flutemetamol F-18	Positron Emission Tomogram	Flushing;Feeling Abnormal;Dyspnoea;Chest Discomfort;Chest Pain	Non-Serious	Non-Serious	Female	13-SEP-2024	06-DEC-2024	Non-Expedited	Not Specified	Not Specified	Ge Healthcare	Healthcare Professional	Not Specified	Trospium;Montelukast;Estradiol;Atorvastatin	13-SEP-2024	06-DEC-2024	US	Not Specified	US-GE HEALTHCARE-2024CSU010780	-	-
53	24	24707936	Vizamyl	Flutemetamol F-18	Positron Emission Tomogram	Chest Pain	Non-Serious	Non-Serious	Female	23-SEP-2024	06-DEC-2024	Non-Expedited	Not Specified	Not Specified	Ge Healthcare	Healthcare Professional	Not Specified	-	23-SEP-2024	06-DEC-2024	US	Not Specified	US-GE HEALTHCARE-2024CSU011002	-	-
54	25	24703268	Vizamyl	Flutemetamol F-18	Positron Emission Tomogram	Myalgia;Erythema;Hot Flush	Non-Serious	Non-Serious	Female	12-SEP-2024	05-DEC-2024	Non-Expedited	Not Specified	70.3 KG	Ge Healthcare	Healthcare Professional	Not Specified	Levothyroxine;Carvedilol;Rosuvastatin;Losartan Potassium	12-SEP-2024	05-DEC-2024	US	Not Specified	US-GE HEALTHCARE-2024CSU010548	-	-
55	26	24703007	Vizamyl	Flutemetamol F-18	Scan Brain	Feeling Hot;Heart Rate Increased;Abdominal Pain Upper;Flushing;Back Pain;Nausea	Non-Serious	Non-Serious	Female	17-SEP-2024	05-DEC-2024	Non-Expedited	Not Specified	90 KG	Ge Healthcare	Healthcare Professional	Not Specified	-	17-SEP-2024	05-DEC-2024	US	Not Specified	US-GE HEALTHCARE-2024CSU010683	-	-
56	27	24702846	Vizamyl	Flutemetamol F-18	Claustrophobia;Positron Emission Tomogram	Throat Irritation;Pruritus;Lip Swelling	Non-Serious	Non-Serious	Female	16-SEP-2024	05-DEC-2024	Non-Expedited	70 YR	Not Specified	Ge Healthcare	Healthcare Professional	Not Specified	Nicorette;Metoprolol Succinate;Valium	16-SEP-2024	05-DEC-2024	US	Not Specified	US-GE HEALTHCARE-2024CSU010781	-	-
57	28	24702842	Vizamyl	Flutemetamol F-18	Diagnostic Procedure	Flushing;Nausea;Dyspnoea;Chest Discomfort	Non-Serious	Non-Serious	Not Specified	16-SEP-2024	05-DEC-2024	Non-Expedited	83 YR	Not Specified	Ge Healthcare	Healthcare Professional	Not Specified	-	17-SEP-2024	05-DEC-2024	US	Not Specified	US-GE HEALTHCARE-2024CSU010659	-	-
58	29	24667993	Vizamyl	Flutemetamol F-18	Diagnostic Procedure	Feeling Hot;Blood Pressure Increased;Erythema;Dizziness;Chest Discomfort	Serious	Other Outcomes	Female	15-NOV-2024	05-DEC-2024	Expedited	Not Specified	Not Specified	Ge Healthcare	Healthcare Professional	Not Specified	-	26-NOV-2024	27-NOV-2024	US	Not Specified	US-GE HEALTHCARE-2024CSU013510	-	-
59	30	24688892	Vizamyl	Flutemetamol F-18	Catheter Management;Positron Emission Tomogram	Feeling Hot;Nausea;Cough;Ear Pruritus;Throat Irritation;Back Pain;Flushing	Non-Serious	Non-Serious	Female	23-SEP-2024	03-DEC-2024	Non-Expedited	40 YR	Not Specified	Ge Healthcare	Healthcare Professional	Not Specified	Donepezil;Sodium Chloride;Fluconazole;Rosuvastatin	23-SEP-2024	03-DEC-2024	US	Not Specified	US-GE HEALTHCARE-2024CSU011001	-	-
60	31	24688231	Vizamyl	Flutemetamol F-18	Positron Emission Tomogram	Flushing;Dyspnoea;Erythema	Non-Serious	Non-Serious	Not Specified	19-SEP-2024	02-DEC-2024	Non-Expedited	Not Specified	Not Specified	Ge Healthcare	Healthcare Professional	Not Specified	Bupropion Hydrochloride;Mirtazapine;Trazodone;Memantine;Deplin	19-SEP-2024	02-DEC-2024	US	Not Specified	US-GE HEALTHCARE-2024CSU010789	-	-
61	32	24643945	Vizamyl	Flutemetamol F-18	Diagnostic Procedure	Dyspnoea;Feeling Abnormal	Non-Serious	Non-Serious	Female	26-AUG-2024	25-NOV-2024	Non-Expedited	Not Specified	Not Specified	Ge Healthcare	Healthcare Professional	Not Specified	Dicyclomine;Amlodipine;Valsartan;Memantine;Bupropion;Ezetimibe;Donepezil	27-AUG-2024	20-NOV-2024	US	Not Specified	US-GE HEALTHCARE-2024CSU009843	-	-
62	33	24654793	Vizamyl	Flutemetamol F-18	Positron Emission Tomogram	Blood Pressure Increased;Visual Impairment;Flushing;Back Pain;Dizziness;Nausea;Hyperhidrosis;Syncope	Serious	Other Outcomes	Male	01-NOV-2024	22-NOV-2024	Expedited	Not Specified	86.168 KG	Ge Healthcare	Healthcare Professional	Not Specified	-	13-NOV-2024	22-NOV-2024	US	Not Specified	US-GE HEALTHCARE-2024CSU013458	-	-
63	34	24638181	Vizamyl	Flutemetamol F-18	Diagnostic Procedure	Flushing;Chest Discomfort	Non-Serious	Non-Serious	Female	29-AUG-2024	19-NOV-2024	Non-Expedited	Not Specified	Not Specified	Ge Healthcare	Healthcare Professional	Not Specified	Metoprolol Tartrate;Lovastatin;Cephalexin;Memantine;Prolia;Doxycycline	29-AUG-2024	19-NOV-2024	US	Not Specified	US-GE HEALTHCARE-2024CSU010108	-	-
64	35	24638180	Vizamyl	Flutemetamol F-18	Diagnostic Procedure	Swelling Face	Non-Serious	Non-Serious	Male	28-AUG-2024	19-NOV-2024	Non-Expedited	Not Specified	Not Specified	Ge Healthcare	Healthcare Professional	Not Specified	-	28-AUG-2024	19-NOV-2024	US	Not Specified	US-GE HEALTHCARE-2024CSU009894	-	-
65	36	24632648	Vizamyl	Flutemetamol F-18	Positron Emission Tomogram	Hot Flush;Back Pain;Cough;Nausea;Loss Of Consciousness	Serious	Other Outcomes	Female	06-NOV-2024	18-NOV-2024	Expedited	Not Specified	65.76 KG	Ge Healthcare	Healthcare Professional	Not Specified	Metoprolol;Famotidine;Clonazepam;Metformin;Trulicity;Losartan;Albuterol Sulfate;Hydrochlorothiazide;Atorvastatin;Sertraline	06-NOV-2024	18-NOV-2024	US	Not Specified	US-GE HEALTHCARE-2024CSU012987	-	-
66	37	24632643	Vizamyl	Flutemetamol F-18	Diagnostic Procedure	Dyspnoea;Chest Pain;Flushing;Back Pain	Non-Serious	Non-Serious	Not Specified	26-AUG-2024	18-NOV-2024	Non-Expedited	94 YR	Not Specified	Ge Healthcare	Healthcare Professional	Not Specified	-	26-AUG-2024	18-NOV-2024	US	Not Specified	US-GE HEALTHCARE-2024CSU009791	-	-
67	38	24594898	Vizamyl	Flutemetamol F-18	Positron Emission Tomogram	Flushing;Blood Pressure Increased	Non-Serious	Non-Serious	Not Specified	15-AUG-2024	08-NOV-2024	Non-Expedited	Not Specified	Not Specified	Ge Healthcare	Healthcare Professional	Not Specified	Duloxetine;Hydrocortisone;Fluticasone;Tamsulosin;Rizatriptan;Sildenafil;Divalproex Sodium	15-AUG-2024	08-NOV-2024	US	Not Specified	US-GE HEALTHCARE-2024CSU009411	-	-
68	39	24558839	Vizamyl	Flutemetamol F-18	Diagnostic Procedure;Magnetic Resonance Imaging	Feeling Hot;Cold Sweat;Back Pain;Flushing;Tremor;Loss Of Consciousness;Dyspnoea;Muscle Spasms	Serious	Other Outcomes	Female	17-OCT-2024	08-NOV-2024	Expedited	Not Specified	Not Specified	Ge Healthcare	Healthcare Professional	Not Specified	Omeprazole;Clariscan;Lisinopril;Metformin;Simvastatin;Levothyroxine	01-NOV-2024	29-OCT-2024	US	Not Specified	US-GE HEALTHCARE-2024CSU012131	-	-
69	40	24581746	Vizamyl	Flutemetamol F-18	Positron Emission Tomogram	Injection Site Pain;Injection Site Bruising;Injection Site Erythema	Serious	Other Outcomes	Not Specified	25-OCT-2024	05-NOV-2024	Expedited	Not Specified	Not Specified	Ge Healthcare	Healthcare Professional	Not Specified	-	25-OCT-2024	05-NOV-2024	US	Not Specified	US-GE HEALTHCARE-2024CSU012409	-	-
70	41	24577711	Vizamyl	Flutemetamol F-18	Positron Emission Tomogram	Drooling;Seizure;Liquid Product Physical Issue;Syncope	Serious	Hospitalized	Female	23-OCT-2024	04-NOV-2024	Expedited	76 YR	Not Specified	Ge Healthcare	Healthcare Professional	Not Specified	-	23-OCT-2024	04-NOV-2024	US	Not Specified	US-GE HEALTHCARE-2024CSU012309	-	-
71	42	24570533	Vizamyl	Flutemetamol F-18	Positron Emission Tomogram	Feeling Hot;Nausea;Dizziness;Malaise;Flushing	Serious	Other Outcomes	Female	23-OCT-2024	31-OCT-2024	Expedited	Not Specified	91.61 KG	Ge Healthcare	Healthcare Professional	Not Specified	-	24-OCT-2024	31-OCT-2024	US	Not Specified	US-GE HEALTHCARE-2024CSU012324	-	-
72	43	24557461	Vizamyl	Flutemetamol F-18	Scan Brain	Back Pain;Injection Site Pain	Non-Serious	Non-Serious	Female	30-JUL-2024	28-OCT-2024	Non-Expedited	Not Specified	102.95 KG	Ge Healthcare	Healthcare Professional	Not Specified	-	01-AUG-2024	28-OCT-2024	US	Not Specified	US-GE HEALTHCARE-2024CSU008846	-	-
73	44	24439499	Vizamyl	Flutemetamol F-18	Diagnostic Procedure	Injection Site Pain	Serious	Other Outcomes	Not Specified	-	15-OCT-2024	Expedited	Not Specified	Not Specified	Ge Healthcare	Healthcare Professional	Not Specified	-	04-OCT-2024	15-OCT-2024	US	Not Specified	US-GE HEALTHCARE-2024CSU011414	-	-
74	45	24439497	Vizamyl	Flutemetamol F-18	Computerised Tomogram Head	Dizziness;Muscle Spasms;Back Pain	Serious	Other Outcomes	Male	04-OCT-2024	15-OCT-2024	Expedited	Not Specified	99 KG	Ge Healthcare	Healthcare Professional	Not Specified	-	04-OCT-2024	15-OCT-2024	US	Not Specified	US-GE HEALTHCARE-2024CSU011412	-	-
75	46	24438174	Vizamyl	Flutemetamol F-18	Diagnostic Procedure	Back Pain	Serious	Other Outcomes	Not Specified	-	15-OCT-2024	Expedited	Not Specified	Not Specified	Ge Healthcare	Healthcare Professional	Not Specified	-	04-OCT-2024	15-OCT-2024	US	Not Specified	US-GE HEALTHCARE-2024CSU011413	-	-
76	47	24431335	Vizamyl	Flutemetamol F-18	Diagnostic Procedure	Arthralgia	Non-Serious	Non-Serious	Not Specified	-	14-OCT-2024	Non-Expedited	Not Specified	Not Specified	Ge Healthcare	Healthcare Professional	Not Specified	-	18-JUL-2024	14-OCT-2024	US	Not Specified	US-GE HEALTHCARE-2024CSU008344	-	-
77	48	24414789	Vizamyl	Flutemetamol F-18	Positron Emission Tomogram	Back Pain	Non-Serious	Non-Serious	Female	18-JUL-2024	09-OCT-2024	Non-Expedited	Not Specified	Not Specified	Ge Healthcare	Healthcare Professional	Not Specified	Saline	18-JUL-2024	09-OCT-2024	US	Not Specified	US-GE HEALTHCARE-2024CSU008209	-	-
78	49	24386236	Vizamyl	Flutemetamol F-18	Diagnostic Procedure	Flushing;Chest Pain;Dyspnoea;Headache	Non-Serious	Non-Serious	Not Specified	09-JUL-2024	01-OCT-2024	Non-Expedited	65 YR	Not Specified	Ge Healthcare	Healthcare Professional	Not Specified	-	12-JUL-2024	01-OCT-2024	US	Not Specified	US-GE HEALTHCARE-2024CSU007955	-	-
79	50	24329374	Vizamyl	Flutemetamol F-18	Diagnostic Procedure	Neck Pain;Nausea;Flushing;Abdominal Pain Upper	Non-Serious	Non-Serious	Not Specified	25-JUN-2024	17-SEP-2024	Non-Expedited	Not Specified	Not Specified	Ge Healthcare	Healthcare Professional	Not Specified	-	25-JUN-2024	17-SEP-2024	US	Not Specified	US-GE HEALTHCARE-2024CSU007157	-	-
80	51	24278500	Vizamyl	Flutemetamol F-18	Positron Emission Tomogram	Nausea;Flushing;Syncope	Non-Serious	Non-Serious	Female	05-JUN-2024	03-SEP-2024	Non-Expedited	Not Specified	Not Specified	Ge Healthcare	Healthcare Professional	Not Specified	-	06-JUN-2024	03-SEP-2024	US	Not Specified	US-GE HEALTHCARE-2024CSU006369	-	-
81	52	24270233	Vizamyl	Flutemetamol F-18	Positron Emission Tomogram	Pelvic Pain;Neck Pain;Back Pain;Muscle Spasms;Heart Rate Increased;Headache	Non-Serious	Non-Serious	Female	04-JUN-2024	30-AUG-2024	Non-Expedited	Not Specified	84.4 KG	Ge Healthcare	Healthcare Professional	Not Specified	Nortriptyline;Benadryl;Sertraline;Lisinopril	04-JUN-2024	30-AUG-2024	US	Not Specified	US-GE HEALTHCARE-2024CSU006213	-	-
82	53	24270228	Vizamyl	Flutemetamol F-18	Positron Emission Tomogram	Muscle Spasms;Neck Pain;Spinal Pain	Non-Serious	Non-Serious	Female	17-MAY-2024	30-AUG-2024	Non-Expedited	Not Specified	74.8 KG	Ge Healthcare	Healthcare Professional	Not Specified	-	04-JUN-2024	30-AUG-2024	US	Not Specified	US-GE HEALTHCARE-2024CSU006212	-	-
83	54	24202000	Vizamyl	Flutemetamol F-18	Diagnostic Procedure	Flushing;Pharyngeal Paraesthesia	Non-Serious	Non-Serious	Female	14-MAY-2024	12-AUG-2024	Non-Expedited	53 YR	72.562 KG	Ge Healthcare	Healthcare Professional	Not Specified	-	17-MAY-2024	12-AUG-2024	US	Not Specified	US-GE HEALTHCARE-2024CSU005293	-	-
84	55	24196151	Vizamyl	Flutemetamol F-18	Diagnostic Procedure	No Adverse Event;Radioisotope Scan Abnormal	Non-Serious	Non-Serious	Not Specified	-	09-AUG-2024	Non-Expedited	Not Specified	Not Specified	Ge Healthcare	Healthcare Professional	Not Specified	-	16-MAY-2024	09-AUG-2024	US	Not Specified	US-GE HEALTHCARE-2024CSU005367	-	-
85	56	24191038	Vizamyl	Flutemetamol F-18	Positron Emission Tomogram	Dizziness;Blood Pressure Increased;Nausea;Feeling Hot;Abdominal Pain Lower;Hyperhidrosis	Non-Serious	Non-Serious	Female	15-MAY-2024	08-AUG-2024	Non-Expedited	Not Specified	110 KG	Ge Healthcare	Healthcare Professional	Not Specified	Saline	15-MAY-2024	08-AUG-2024	US	Not Specified	US-GE HEALTHCARE-2024CSU005253	-	-
86	57	24132397	Vizamyl	Flutemetamol F-18	Diagnostic Procedure	Flushing;Dyspnoea	Non-Serious	Non-Serious	Not Specified	30-APR-2024	24-JUL-2024	Non-Expedited	62 YR	Not Specified	Ge Healthcare	Healthcare Professional	Not Specified	-	02-MAY-2024	24-JUL-2024	US	Not Specified	US-GE HEALTHCARE-2024CSU004765	-	-
87	58	24106845	Vizamyl	Flutemetamol F-18	Positron Emission Tomogram	Flushing;Dyspnoea;Feeling Abnormal	Non-Serious	Non-Serious	Female	24-APR-2024	17-JUL-2024	Non-Expedited	75 YR	Not Specified	Ge Healthcare	Healthcare Professional	Not Specified	-	25-APR-2024	17-JUL-2024	US	Not Specified	US-GE HEALTHCARE-2024CSU004397	-	-
88	59	24106843	Vizamyl	Flutemetamol F-18	Diagnostic Procedure	Back Pain	Non-Serious	Non-Serious	Not Specified	22-APR-2024	17-JUL-2024	Non-Expedited	90 YR	Not Specified	Ge Healthcare	Healthcare Professional	Not Specified	-	24-APR-2024	17-JUL-2024	US	Not Specified	US-GE HEALTHCARE-2024CSU004348	-	-
89	60	24017991	Vizamyl	Flutemetamol F-18	Diagnostic Procedure	Nausea;Back Pain;Flushing	Non-Serious	Non-Serious	Female	02-APR-2024	27-JUN-2024	Non-Expedited	Not Specified	65.7 KG	Ge Healthcare	Healthcare Professional	Not Specified	-	08-APR-2024	27-JUN-2024	US	Not Specified	US-GE HEALTHCARE-2024CSU003634	-	-
90	61	24015249	Vizamyl	Flutemetamol F-18	Diagnostic Procedure	Blood Glucose Decreased;Flushing	Non-Serious	Non-Serious	Not Specified	-	26-JUN-2024	Non-Expedited	Not Specified	Not Specified	Ge Healthcare	Healthcare Professional	Not Specified	-	11-APR-2024	26-JUN-2024	US	Not Specified	US-GE HEALTHCARE-2024CSU003744	-	-
91	62	23978257	Vizamyl	Flutemetamol F-18	Imaging Procedure	Loss Of Consciousness	Serious	Other Outcomes	Not Specified	05-JUN-2024	14-JUN-2024	Expedited	Not Specified	Not Specified	Ge Healthcare	Healthcare Professional	Not Specified	-	05-JUN-2024	14-JUN-2024	US	Not Specified	US-GE HEALTHCARE-2024CSU006273	-	-
92	63	23974829	Vizamyl	Flutemetamol F-18	Diagnostic Procedure	Lethargy;Staring;Dizziness;Cold Sweat;Somnolence;Back Pain;Liquid Product Physical Issue	Non-Serious	Non-Serious	Male	02-APR-2024	14-JUN-2024	Non-Expedited	82 YR	Not Specified	Ge Healthcare	Healthcare Professional	Not Specified	-	02-APR-2024	14-JUN-2024	US	Not Specified	US-GE HEALTHCARE-2024CSU003376	-	-
93	64	23810560	Vizamyl	Flutemetamol F-18	Positron Emission Tomogram	Erythema	Non-Serious	Non-Serious	Female	06-MAR-2024	02-MAY-2024	Non-Expedited	Not Specified	61.224 KG	Ge Healthcare	Healthcare Professional	Not Specified	Ibuprofen;Tylenol	06-MAR-2024	02-MAY-2024	US	Not Specified	US-GE HEALTHCARE-2024CSU002279	-	-
94	65	23808874	Vizamyl	Flutemetamol F-18	Diagnostic Procedure	Flushing;Abdominal Discomfort;Dizziness	Non-Serious	Non-Serious	Female	27-FEB-2024	02-MAY-2024	Non-Expedited	Not Specified	89.342 KG	Ge Healthcare	Healthcare Professional	Not Specified	-	06-MAR-2024	02-MAY-2024	US	Not Specified	US-GE HEALTHCARE-2024CSU002276	-	-
95	66	23796833	Vizamyl	Flutemetamol F-18	Positron Emission Tomogram	Dizziness;Anaphylactic Reaction	Serious	Other Outcomes	Female	13-FEB-2024	30-APR-2024	Expedited	81 YR	Not Specified	Ge Healthcare	Healthcare Professional	Not Specified	-	15-FEB-2024	30-APR-2024	JP	Not Specified	JP-GE HEALTHCARE-2024CSU004351	-	-
96	67	23775441	Vizamyl	Flutemetamol F-18	Diagnostic Procedure	Blood Glucose Decreased;Aphasia;Feeling Hot;Dizziness	Serious	Other Outcomes	Not Specified	-	23-APR-2024	Expedited	Not Specified	Not Specified	Ge Healthcare	Healthcare Professional	Not Specified	-	12-APR-2024	23-APR-2024	US	Not Specified	US-GE HEALTHCARE-2024CSU003791	-	-
97	68	23765684	Vizamyl	Flutemetamol F-18	Diagnostic Procedure	Abdominal Discomfort;Flushing	Non-Serious	Non-Serious	Female	27-FEB-2024	21-APR-2024	Non-Expedited	Not Specified	70.748 KG	Ge Healthcare	Healthcare Professional	Not Specified	-	06-MAR-2024	21-APR-2024	US	Not Specified	US-GE HEALTHCARE-2024CSU002275	-	-
98	69	23724288	Vizamyl	Flutemetamol F-18	-	Flushing;Chest Pain;Hyperhidrosis;Dyspnoea	Non-Serious	Non-Serious	Not Specified	13-FEB-2023	09-APR-2024	Non-Expedited	74 YR	Not Specified	Ge Healthcare	Healthcare Professional	Not Specified	-	13-FEB-2024	09-APR-2024	US	Not Specified	US-GE HEALTHCARE-2024CSU001488	-	-
99	70	23532407	Vizamyl	Flutemetamol F-18	Diagnostic Procedure	Abdominal Pain Upper;Pain;Burning Sensation;Paraesthesia Oral;Vomiting;Headache;Pallor;Fatigue;Flushing;Dysgeusia;Nausea;Hyperhidrosis	Non-Serious	Non-Serious	Female	04-JAN-2024	16-FEB-2024	Non-Expedited	56 YR	Not Specified	Ge Healthcare	Healthcare Professional	Not Specified	-	05-JAN-2024	16-FEB-2024	US	Not Specified	US-GE HEALTHCARE-2024CSU000248	-	-
100	71	23444953	Vizamyl	Flutemetamol F-18	Diagnostic Procedure	Flushing;Musculoskeletal Pain;Glassy Eyes;Nausea;Muscle Rigidity	Non-Serious	Non-Serious	Male	19-DEC-2023	25-JAN-2024	Non-Expedited	90 YR	Not Specified	Ge Healthcare	Healthcare Professional	Not Specified	Ascorbic Acid;Pepcid;Vitamin B Complex;Valsartan;Furosemide;Gemtesa;Ciclopirox;Medrol;Vitamin D3;Sertraline;Apixaban;Clonazepam;Memantine	19-DEC-2023	25-JAN-2024	US	Not Specified	US-GE HEALTHCARE-2023CSU011747	-	-
101	72	23337034	Vizamyl	Flutemetamol F-18	Diagnostic Procedure;Product Used For Unknown Indication	Hyperhidrosis;Paraesthesia;Drooling;Unresponsive To Stimuli;Seizure;Blood Pressure Decreased;Syncope	Serious	Other Outcomes	Female	19-DEC-2023	26-DEC-2023	Expedited	77 YR	Not Specified	Ge Healthcare	Healthcare Professional	Not Specified	-	19-DEC-2023	26-DEC-2023	US	Not Specified	US-GE HEALTHCARE-2023CSU011746	-	-
102	73	23301981	Vizamyl	Flutemetamol F-18	Diagnostic Procedure;Product Used For Unknown Indication	Muscle Spasms	Non-Serious	Non-Serious	Male	14-SEP-2023	15-DEC-2023	Non-Expedited	Not Specified	94 KG	Ge Healthcare	Healthcare Professional	Not Specified	-	27-SEP-2023	15-DEC-2023	US	Not Specified	US-GE HEALTHCARE-2023CSU008919	-	-
103	74	22758059	Vizamyl	Flutemetamol F-18	Dementia Alzheimer's Type;Imaging Procedure	Hypersensitivity	Non-Serious	Non-Serious	Female	09-MAY-2023	03-OCT-2023	Non-Expedited	Not Specified	76 KG	Ge Healthcare	Healthcare Professional	Not Specified	-	31-JUL-2023	27-JUL-2023	US	Not Specified	US-GE HEALTHCARE-2023CSU004606	-	-
104	75	22398494	Vizamyl	Flutemetamol F-18	Catheter Management;Dementia;Diagnostic Procedure	Urinary Incontinence;Nausea;Loss Of Consciousness;Cardiac Arrest;Incorrect Product Administration Duration;Dyspnoea;Ocular Hyperaemia;Brain Stem Haemorrhage;Chest Pain;Flushing	Serious	Other Outcomes;Died;Hospitalized	Female	26-MAY-2023	27-SEP-2023	Expedited	78 YR	Not Specified	Ge Healthcare	Healthcare Professional	Not Specified	Sodium Chloride	19-SEP-2023	02-JUN-2023	SE	Not Specified	SE-GE HEALTHCARE-2023CSU004217	-	-
105	76	22945273	Vizamyl	Flutemetamol F-18	Diagnostic Procedure;Product Used For Unknown Indication	Flushing;Dizziness	Non-Serious	Non-Serious	Female	27-JUN-2023	14-SEP-2023	Non-Expedited	Not Specified	Not Specified	Ge Healthcare	Healthcare Professional	Not Specified	-	29-JUN-2023	14-SEP-2023	US	Not Specified	US-GE HEALTHCARE-2023CSU005401	-	-
106	77	22945162	Vizamyl	Flutemetamol F-18	Product Used For Unknown Indication;Scan	Flushing;Dizziness;Arthralgia	Non-Serious	Non-Serious	Female	27-JUN-2023	14-SEP-2023	Non-Expedited	Not Specified	Not Specified	Ge Healthcare	Healthcare Professional	Not Specified	-	29-JUN-2023	14-SEP-2023	US	Not Specified	US-GE HEALTHCARE-2023CSU005400	-	-
107	78	22936572	Vizamyl	Flutemetamol F-18	Positron Emission Tomography-Magnetic Resonance Imaging;Product Used For Unknown Indication	Nausea;Dysgeusia;Hyperhidrosis;Flushing;Heart Rate Increased	Non-Serious	Non-Serious	Not Specified	14-JUN-2023	12-SEP-2023	Non-Expedited	Not Specified	Not Specified	Ge Healthcare	Healthcare Professional	Not Specified	-	20-JUN-2023	12-SEP-2023	US	Not Specified	US-GE HEALTHCARE-2023CSU005028	-	-
108	79	22929736	Vizamyl	Flutemetamol F-18	Positron Emission Tomography-Magnetic Resonance Imaging;Product Used For Unknown Indication	Blood Pressure Increased;Nausea;Malaise;Vomiting	Non-Serious	Non-Serious	Female	14-JUN-2023	11-SEP-2023	Non-Expedited	Not Specified	Not Specified	Ge Healthcare	Healthcare Professional	Not Specified	-	20-JUN-2023	11-SEP-2023	US	Not Specified	US-GE HEALTHCARE-2023CSU005027	-	-
109	80	22926416	Vizamyl	Flutemetamol F-18	Positron Emission Tomogram;Product Used For Unknown Indication	Hypersensitivity	Non-Serious	Non-Serious	Female	13-JUN-2023	09-SEP-2023	Non-Expedited	65 YR	Not Specified	Ge Healthcare	Healthcare Professional	Not Specified	-	15-JUN-2023	09-SEP-2023	US	Not Specified	US-GE HEALTHCARE-2023CSU004916	-	-
110	81	22398493	Vizamyl	Flutemetamol F-18	Amyloidosis;Catheter Management;Diagnostic Procedure	Nausea;Chest Pain;Abdominal Pain Upper;Dizziness;Flushing	Serious	Other Outcomes	Female	26-MAY-2023	31-JUL-2023	Expedited	60 YR	Not Specified	Ge Healthcare	Healthcare Professional	Not Specified	Sodium Chloride	19-JUL-2023	02-JUN-2023	SE	Not Specified	SE-GE HEALTHCARE-2023CSU004218	-	-
111	82	22742269	Vizamyl	Flutemetamol F-18	Diagnostic Procedure;Product Used For Unknown Indication	Hypotension;Dyspnoea;Erythema	Serious	Other Outcomes	Female	30-SEP-2021	24-JUL-2023	Expedited	Not Specified	80 KG	Ge Healthcare	Healthcare Professional	Not Specified	Foster	19-JUL-2023	24-JUL-2023	NL	Not Specified	NL-GE HEALTHCARE-2023CSU006080	-	-
112	83	22197988	Vizamyl	Flutemetamol F-18	Dementia Alzheimer's Type;Positron Emission Tomogram	Muscular Weakness;Chest Discomfort;Blood Pressure Increased;Nausea	Serious	Hospitalized	Not Specified	30-MAR-2023	11-APR-2023	Expedited	Not Specified	Not Specified	Ge Healthcare	Healthcare Professional	Not Specified	-	31-MAR-2023	11-APR-2023	CN	Not Specified	CN-GE HEALTHCARE-2023CSU002376	-	-
113	84	21763149	Vizamyl	Flutemetamol F-18	Dementia;Diagnostic Procedure	Respiratory Tract Oedema;Loss Of Consciousness;Nausea;Dyspnoea;Vomiting;Cyanosis	Serious	Life Threatening	Male	09-DEC-2022	01-FEB-2023	Expedited	84 YR	70 KG	Ge Healthcare	Healthcare Professional	Not Specified	-	30-JAN-2023	21-DEC-2022	SE	Not Specified	SE-GE HEALTHCARE-2022CSU009076	-	-
114	85	21750596	Vizamyl	Flutemetamol F-18	Dementia Alzheimer's Type;Diagnostic Procedure	Palpitations;Erythema;Cough;Angina Pectoris	Serious	Other Outcomes	Female	13-DEC-2022	23-DEC-2022	Expedited	77 YR	Not Specified	Ge Healthcare	Healthcare Professional	Not Specified	Quetiapine Fumarate;Trazodone Hydrochloride;Aricept	20-DEC-2022	19-DEC-2022	CH	Not Specified	CH-GE HEALTHCARE-2022CSU009126	-	-
115	86	20962675	-	Flutemetamol	-	Blood Pressure Increased;Heart Rate Decreased;Dizziness;Chest Discomfort;Muscle Spasms;Hyperhidrosis	Serious	Hospitalized	Not Specified	06-MAY-2022	15-JUN-2022	Direct	74 YR	Not Specified	Fda-Ctu	Healthcare Professional	Not Specified	-	-	15-JUN-2022	Not Specified	Not Specified	-	-	-
116	87	20845573	Vizamyl	Flutemetamol F-18	Positron Emission Tomogram;Retrograde Amnesia	Dizziness;Blood Pressure Increased;Muscle Spasms;Hyperhidrosis;Chest Discomfort	Serious	Other Outcomes	Male	06-MAY-2022	18-MAY-2022	Expedited	Not Specified	97 KG	Ge Healthcare	Healthcare Professional	Not Specified	-	09-MAY-2022	18-MAY-2022	US	Not Specified	US-GE HEALTHCARE-2022CSU003148	-	-
117	88	20638884	Vizamyl	Flutemetamol F-18	Diagnostic Procedure;Product Used For Unknown Indication	Syncope;Anaphylactic Reaction;Erythema	Serious	Life Threatening;Other Outcomes	Female	30-SEP-2021	18-MAY-2022	Expedited	42 YR	82 KG	Ge Healthcare	Healthcare Professional	Not Specified	-	05-MAY-2022	25-MAR-2022	NL	Not Specified	NL-GE HEALTHCARE-2022CSU001983	-	-
118	89	20607715	Vizamyl	Flutemetamol F-18	Cognitive Disorder;Diagnostic Procedure	Dizziness;Flushing;Blood Pressure Increased;Chest Discomfort;Nausea;Feeling Hot	Serious	Other Outcomes	Female	07-MAR-2022	19-APR-2022	Expedited	56 YR	Not Specified	Ge Healthcare	Healthcare Professional	Not Specified	Brintellix;Pantoprazole	11-APR-2022	17-MAR-2022	ES	Not Specified	ES-GE HEALTHCARE-2022CSU001662	-	-
119	90	20463035	Vizamyl	Flutemetamol F-18	Positron Emission Tomogram;Product Used For Unknown Indication	Aphasia;Myoclonus;Epilepsy	Serious	Hospitalized	Male	03-FEB-2022	16-MAR-2022	Expedited	66 YR	105 KG	Ge Healthcare	Healthcare Professional	Not Specified	Atorvastatin;Cialis;Clonazepam;Felodipine;Aspirin;Sertraline Hydrochloride	07-MAR-2022	11-FEB-2022	SE	Not Specified	SE-GE HEALTHCARE-2022CSU000810	-	-
120	91	20092313	Vizamyl	Flutemetamol F-18	Amyloid Related Imaging Abnormalities;Hypertension;Positron Emission Tomogram;Type 2 Diabetes Mellitus	Dyspnoea;Asthenia;Back Pain;Dizziness;Flushing	Serious	Other Outcomes	Not Specified	09-NOV-2021	25-JAN-2022	Expedited	Not Specified	Not Specified	Ge Healthcare	Healthcare Professional	Not Specified	Metformin;Losartan	09-DEC-2021	19-NOV-2021	IL	Not Specified	IL-GE HEALTHCARE-2021CSU005648	-	-
121	92	18040368	Vizamyl	Flutemetamol F-18	Positron Emission Tomogram;Product Used For Unknown Indication	Peripheral Swelling;Pain In Extremity;Arthritis Bacterial	Serious	Hospitalized	Not Specified	17-JUN-2020	25-JAN-2022	Expedited	Not Specified	Not Specified	Ge Healthcare	Healthcare Professional	Not Specified	-	13-JAN-2022	17-JUL-2020	KR	Not Specified	KR-GE HEALTHCARE LIFE SCIENCES-2020CSU002718	-	-
122	93	20346253	Vizamyl	Flutemetamol F-18	Positron Emission Tomogram;Product Used For Unknown Indication	Radioisotope Scan Abnormal;No Adverse Event	Non-Serious	Non-Serious	Male	05-NOV-2021	18-JAN-2022	Non-Expedited	Not Specified	Not Specified	Ge Healthcare	Healthcare Professional	Not Specified	-	05-NOV-2021	18-JAN-2022	US	Not Specified	US-GE HEALTHCARE-2021CSU005628	-	-
123	94	20259334	Vizamyl	Flutemetamol F-18	Dementia Alzheimer's Type;Diagnostic Procedure	Breast Cancer	Serious	Other Outcomes	Not Specified	DEC-2021	17-JAN-2022	Expedited	Not Specified	Not Specified	Ge Healthcare	Healthcare Professional	Not Specified	Levothyroxine;Simvastatin;Hydrochlorothiazide	05-JAN-2022	30-DEC-2021	ES	Not Specified	ES-GE HEALTHCARE-2021CSU006725	-	-
124	95	20091886	Vizamyl	Flutemetamol F-18	Amyloid Related Imaging Abnormalities;Arrhythmia;Hypercholesterolaemia;Positron Emission Tomogram;Type 2 Diabetes Mellitus	Burning Sensation;Back Pain;Asthenia;Photopsia	Serious	Other Outcomes	Not Specified	17-OCT-2021	16-DEC-2021	Expedited	Not Specified	Not Specified	Ge Healthcare	Healthcare Professional	Not Specified	Eliquis;Ozempic;Lipitor;Bisoprolol Fumarate;Vitamin D;Diovan;Vitamin B12	09-DEC-2021	19-NOV-2021	IL	Not Specified	IL-GE HEALTHCARE-2021CSU005647	-	-
125	96	19570648	Vizamyl	Flutemetamol F-18;Gantenerumab	Dementia Alzheimer's Type;Depression;Diagnostic Procedure;Gastrooesophageal Reflux Disease;Hypertension	Femur Fracture;Fall	Serious	Hospitalized	Female	24-JUN-2021	15-JUL-2021	Expedited	70 YR	Not Specified	Ge Healthcare	Healthcare Professional	Not Specified	Ubidecarenone;Amlodipine;Donepezil;Escitalopram;Glucosamine;Omeprazole;Vitamin C	07-JUL-2021	15-JUL-2021	US	Not Specified	US-GE HEALTHCARE LIFE SCIENCES-2021CSU003408	-	-
126	97	19416540	Vizamyl	Flutemetamol F-18	Cognitive Disorder;Computerised Tomogram Head;Epilepsy;Positron Emission Tomogram	Hyperhidrosis;Flushing;Nausea;Infusion Related Reaction;Dyspnoea;Dizziness;Back Pain;Suffocation Feeling;Headache	Serious	Hospitalized	Not Specified	07-MAY-2021	14-JUN-2021	Expedited	Not Specified	Not Specified	Ge Healthcare	Healthcare Professional	Not Specified	-	10-MAY-2021	14-JUN-2021	ES	Not Specified	ES-GE HEALTHCARE LIFE SCIENCES-2021CSU002355	-	-
127	98	19245062	Vizamyl	Flutemetamol F-18	Positron Emission Tomogram;Product Used For Unknown Indication	Blood Creatinine Increased	Non-Serious	Non-Serious	Not Specified	10-JUN-2020	18-MAY-2021	Non-Expedited	Not Specified	Not Specified	Ge Healthcare	Healthcare Professional	Not Specified	-	08-FEB-2021	11-MAY-2021	US	Not Specified	US-GE HEALTHCARE LIFE SCIENCES-2021CSU000770	-	-
128	99	15881845	Vizamyl	Flutemetamol F-18	Diagnostic Procedure;Product Used For Unknown Indication;Rhinitis Allergic	Shock;Nausea;Depressed Level Of Consciousness;Visual Impairment;Headache	Serious	Other Outcomes	Not Specified	12-JAN-2019	05-JAN-2021	Expedited	Not Specified	Not Specified	Ge Healthcare	Healthcare Professional	Not Specified	Pseudoephedrine.;Bepotastine	02-NOV-2019	28-JAN-2019	KR	Not Specified	KR-GE HEALTHCARE LIFE SCIENCES-2019CSU000424	-	-
129	100	17653207	Vizamyl	Flutemetamol F-18	Positron Emission Tomogram;Product Used For Unknown Indication	Hypertensive Urgency	Serious	Life Threatening	Not Specified	11-FEB-2020	14-MAY-2020	Expedited	Not Specified	Not Specified	Ge Healthcare	Healthcare Professional	Not Specified	Aspirin;Metformin\Sitagliptin;Irbesartan;Rosuvastatin	06-MAY-2020	09-APR-2020	CH	Not Specified	CH-GE HEALTHCARE LIFE SCIENCES-2020CSU001419	-	-
130	101	17460194	Vizamyl	Flutemetamol F-18	Positron Emission Tomogram;Product Used For Unknown Indication	Flushing	Non-Serious	Non-Serious	Not Specified	30-OCT-2018	25-FEB-2020	Non-Expedited	Not Specified	Not Specified	Ge Healthcare	Healthcare Professional	Not Specified	-	23-OCT-2019	25-FEB-2020	US	Not Specified	US-GE HEALTHCARE LIFE SCIENCES-2019CSU005707	-	-
131	102	17452332	Vizamyl	Flutemetamol F-18	Positron Emission Tomogram;Product Used For Unknown Indication	Musculoskeletal Stiffness	Non-Serious	Non-Serious	Not Specified	28-FEB-2019	24-FEB-2020	Non-Expedited	Not Specified	Not Specified	Ge Healthcare	Healthcare Professional	Not Specified	-	23-OCT-2019	24-FEB-2020	US	Not Specified	US-GE HEALTHCARE LIFE SCIENCES-2019CSU005710	-	-
132	103	17452329	Vizamyl	Flutemetamol F-18	Positron Emission Tomogram;Product Used For Unknown Indication	Dizziness;Nausea	Non-Serious	Non-Serious	Not Specified	26-JUN-2019	24-FEB-2020	Non-Expedited	Not Specified	Not Specified	Ge Healthcare	Healthcare Professional	Not Specified	-	23-OCT-2019	24-FEB-2020	US	Not Specified	IS-GE HEALTHCARE LIFE SCIENCES-2019CSU005709	-	-
133	104	17452322	Vizamyl	Flutemetamol F-18	Positron Emission Tomogram;Product Used For Unknown Indication	Dysgeusia	Non-Serious	Non-Serious	Not Specified	11-OCT-2018	24-FEB-2020	Non-Expedited	Not Specified	Not Specified	Ge Healthcare	Healthcare Professional	Not Specified	-	23-OCT-2019	24-FEB-2020	US	Not Specified	US-GE HEALTHCARE LIFE SCIENCES-2019CSU005708	-	-
134	105	17084623	Vizamyl	Flutemetamol F-18	Dementia;Positron Emission Tomography-Magnetic Resonance Imaging	Erythema;Rash;Feeling Hot;Flushing	Serious	Other Outcomes	Not Specified	20-NOV-2019	23-DEC-2019	Expedited	Not Specified	Not Specified	Ge Healthcare	Healthcare Professional	Not Specified	Calcium Carbonate\Cholecalciferol;Salagen;Calcifediol;Hydroxychloroquine Sulfate;Prednisone;Prolia;Omeprazole	17-DEC-2019	27-NOV-2019	ES	Not Specified	ES-GE HEALTHCARE LIFE SCIENCES-2019CSU005995	-	-
135	106	16480993	Vizamyl	Flutemetamol F-18;Aducanumab	Dementia Alzheimer's Type;Eczema;Hypertension;Lacunar Infarction;Osteoarthritis;Positron Emission Tomogram;Vitamin Supplementation	Stress Cardiomyopathy	Serious	Hospitalized;Other Outcomes	Not Specified	12-JUN-2019	23-AUG-2019	Expedited	Not Specified	Not Specified	Ge Healthcare	Healthcare Professional	Not Specified	Folic Acid;Loxoprofen Sodium;Aspirin;Kallidinogenase;Clobetasone Butyrate;Reminyl;Glycosaminoglycans;Prednisolone Valerate Acetate;Amlodipine Besylate	16-AUG-2019	26-JUN-2019	JP	Not Specified	JP-GE HEALTHCARE LIFE SCIENCES-2019CSU003344	-	-
136	107	16171545	Vizamyl	Flutemetamol F-18;Aducanumab	Cognitive Disorder;Dementia Alzheimer's Type;Positron Emission Tomogram	Cataract;Lymphoma	Serious	Other Outcomes;Hospitalized	Not Specified	25-MAR-2019	10-JUL-2019	Expedited	Not Specified	Not Specified	Ge Healthcare	Healthcare Professional	Not Specified	Reminyl	01-JUL-2019	08-APR-2019	JP	Not Specified	JP-GE HEALTHCARE LIFE SCIENCES-2019CSU001816	-	-
137	108	16379632	Vizamyl	Flutemetamol F-18	Dementia Alzheimer's Type;Positron Emission Tomogram	Pain;Chest Pain;Heart Rate Increased;Tremor	Serious	Other Outcomes	Not Specified	15-MAY-2019	18-JUN-2019	Expedited	Not Specified	Not Specified	Ge Healthcare	Healthcare Professional	Not Specified	Metoprolol;Cholecalciferol;Pantoprazole;Losartan;Ticagrelor;Simvastatin	12-JUN-2019	31-MAY-2019	NL	Not Specified	NL-GE HEALTHCARE LIFE SCIENCES-2019CSU002799	-	-
138	109	16388884	Vizamyl	Flutemetamol F-18;Aducanumab	Computerised Tomogram Head;Dementia Alzheimer's Type;Positron Emission Tomogram	Heat Illness	Serious	Hospitalized	Not Specified	12-MAY-2019	12-JUN-2019	Expedited	Not Specified	Not Specified	Ge Healthcare	Healthcare Professional	Not Specified	Galantamine;Cilnidipine;Azilsartan Kamedoxomil;Loxoprofen	03-JUN-2019	04-JUN-2019	JP	Not Specified	JP-GE HEALTHCARE LIFE SCIENCES-2019CSU002673	-	-
139	110	15834818	Vizamyl	Flutemetamol F-18;Aducanumab	Dementia Alzheimer's Type;Dyslipidaemia;Gastrooesophageal Reflux Disease;Insomnia;Positron Emission Tomogram	Acute Coronary Syndrome	Serious	Other Outcomes	Not Specified	04-JAN-2019	11-JUN-2019	Expedited	Not Specified	Not Specified	Ge Healthcare	Healthcare Professional	Not Specified	Herbals;Nexium;Tranexamic Acid;Livalo;Aricept	03-JUN-2019	16-JAN-2019	JP	Not Specified	JP-GE HEALTHCARE LIFE SCIENCES-2019CSU000181	-	-
140	111	16364072	Vizamyl	Flutemetamol F-18;Aducanumab	Dementia Alzheimer's Type;Gastritis Prophylaxis;Hypertension;Irritability;Osteoarthritis	Breast Cancer;Febrile Neutropenia	Serious	Hospitalized;Other Outcomes	Not Specified	03-JUN-2018	28-MAY-2019	Expedited	Not Specified	Not Specified	Ge Healthcare	Healthcare Professional	Not Specified	Rebamipide;Rivastigmine;Azilsartan Kamedoxomil;Memantine Hydrochloride;Nifedipine;Loxoprofen Sodium Dihydrate	05-JUL-2018	28-MAY-2019	JP	Not Specified	JP-GE HEALTHCARE LIFE SCIENCES-2018CSU002628	-	-
141	112	16125021	Vizamyl	Flutemetamol F-18;Aducanumab	Anaesthesia;Dementia Alzheimer's Type;Haemorrhoid Operation;Haemorrhoids;Positron Emission Tomogram	Haemorrhoids	Serious	Hospitalized	Not Specified	14-MAR-2019	30-APR-2019	Expedited	Not Specified	Not Specified	Ge Healthcare	Healthcare Professional	Not Specified	Hydrocortisone;Donepezil Hydrochloride;Enema (Sodium Phosphate, Dibasic\Sodium Phosphate, Monobasic);Bupivacaine Hydrochloride;Flurbiprofen Axetil	22-APR-2019	27-MAR-2019	JP	Not Specified	JP-GE HEALTHCARE LIFE SCIENCES-2019CSU001577	-	-
142	113	15783651	Vizamyl	Flutemetamol F-18;Aducanumab	Dementia Alzheimer's Type;Hyperlipidaemia;Hypertonic Bladder	Lung Neoplasm Malignant	Serious	Hospitalized	Not Specified	25-OCT-2018	30-APR-2019	Expedited	Not Specified	Not Specified	Ge Healthcare	Healthcare Professional	Not Specified	Fluvastatin Sodium;Fesoterodine Fumarate;Donepezil Hydrochloride	23-APR-2019	02-JAN-2019	JP	Not Specified	JP-GE HEALTHCARE LIFE SCIENCES-2018CSU004400	-	-
143	114	15963991	Vizamyl	Flutemetamol F-18;Aducanumab	Dementia Alzheimer's Type;Enteritis;Gastrooesophageal Reflux Disease;Glaucoma;Hepatic Steatosis;Hypertension;Hyperuricaemia;Hyperuricosuria;Positron Emission Tomogram;Premedication	Large Intestine Polyp	Serious	Hospitalized	Not Specified	19-FEB-2018	24-APR-2019	Expedited	Not Specified	Not Specified	Ge Healthcare	Healthcare Professional	Not Specified	Atenolol;Urso;Rabeprazole Sodium;Travoprost;Sennosides;Ursodiol;Imidapril;Bifidobacterium Animalis Lactis;Nifedipine;Amlodipine Besylate\Irbesartan;Potassium Chloride\Sodium Bicarbonate\Sodium Sulfate;Febuxostat;Brimonidine Tartrate;Dietary Supplement\Probiotics;Magnesium Citrate;Brinzolamide;Soldem 3a	16-APR-2019	14-FEB-2019	JP	Not Specified	JP-GE HEALTHCARE LIFE SCIENCES-2018CSU000840	-	-
144	115	15715597	Vizamyl	Flutemetamol F-18;Aducanumab	Dementia Alzheimer's Type;Diabetes Mellitus;Hyperlipidaemia;Hypertension;Positron Emission Tomogram	Gastric Cancer	Serious	Other Outcomes;Hospitalized	Not Specified	23-OCT-2018	26-MAR-2019	Expedited	Not Specified	Not Specified	Ge Healthcare	Healthcare Professional	Not Specified	Gliclazide;Voglibose;Amlodipine Besylate;Pravastatin Sodium;Sitagliptin Phosphate;Metformin Hydrochloride	18-MAR-2019	12-DEC-2018	JP	Not Specified	JP-GE HEALTHCARE LIFE SCIENCES-2018CSU004972	-	-
145	116	15864930	Vizamyl	Flutemetamol F-18;Aducanumab	Conjunctivitis Allergic;Dementia Alzheimer's Type;Hyperlipidaemia;Positron Emission Tomogram;Prophylaxis	Constipation	Serious	Hospitalized	Not Specified	16-JAN-2019	11-FEB-2019	Expedited	Not Specified	Not Specified	Ge Healthcare	Healthcare Professional	Not Specified	Atorvastatin;Sodium Hyaluronate;Donepezil;Fluorometholone	04-FEB-2019	24-JAN-2019	JP	Not Specified	JP-GE HEALTHCARE LIFE SCIENCES-2019CSU000356	-	-
146	117	15855536	Vizamyl	Flutemetamol F-18;Aducanumab	Dementia Alzheimer's Type	Ankle Fracture	Serious	Hospitalized	Not Specified	30-MAR-2018	22-JAN-2019	Expedited	Not Specified	Not Specified	Ge Healthcare	Healthcare Professional	Not Specified	Donepezil Hydrochloride	10-APR-2018	22-JAN-2019	JP	Not Specified	JP-GE HEALTHCARE LIFE SCIENCES-2018CSU001416	-	-
147	118	15742336	Vizamyl	Flutemetamol F-18;Aducanumab	Dementia Alzheimer's Type;Hyperlipidaemia;Rhinitis Allergic	Iron Deficiency Anaemia	Serious	Hospitalized	Not Specified	27-SEP-2018	17-JAN-2019	Expedited	Not Specified	Not Specified	Ge Healthcare	Healthcare Professional	Not Specified	Fluticasone Propionate;Pitavastatin.;Donepezil	10-JAN-2019	19-DEC-2018	JP	Not Specified	JP-GE HEALTHCARE LIFE SCIENCES-2018CSU003883	-	-
148	119	15662354	Vizamyl	Flutemetamol F-18;Aducanumab	Dementia Alzheimer's Type;Eczema;Gastric Cancer;Intervertebral Disc Disorder;Osteoarthritis	Gastric Cancer;Oesophageal Carcinoma	Serious	Other Outcomes	Not Specified	13-JUN-2018	11-DEC-2018	Expedited	Not Specified	Not Specified	Ge Healthcare	Healthcare Professional	Not Specified	Loxoprofen Sodium;Glycosaminoglycans;Yakuban;Nexium;Rivastigmine	04-DEC-2018	27-NOV-2018	JP	Not Specified	JP-GE HEALTHCARE LIFE SCIENCES-2018CSU002393	-	-
149	120	15618535	Vizamyl	Flutemetamol F-18	Dementia Alzheimer's Type;Dry Eye;Hypertension	Ophthalmic Herpes Zoster	Serious	Other Outcomes	Not Specified	06-OCT-2018	06-DEC-2018	Expedited	Not Specified	Not Specified	Ge Healthcare	Healthcare Professional	Not Specified	Rebamipide;Diquafosol Tetrasodium;Benidipine Hydrochloride	27-NOV-2018	14-NOV-2018	JP	Not Specified	JP-GE HEALTHCARE LIFE SCIENCES-2018CSU004609	-	-
150	121	15691861	Vizamyl	Flutemetamol F-18	Product Used For Unknown Indication	Cholangiocarcinoma	Serious	Other Outcomes	Not Specified	27-NOV-2018	05-DEC-2018	Expedited	Not Specified	Not Specified	Ge Healthcare	Healthcare Professional	Not Specified	-	27-NOV-2018	05-DEC-2018	ES	Not Specified	ES-GE HEALTHCARE LIFE SCIENCES-2018CSU004887	-	-
151	122	15662355	Vizamyl	Flutemetamol F-18;Aducanumab	Back Pain;Cerebrovascular Accident Prophylaxis;Constipation;Dementia Alzheimer's Type	Complicated Fracture;Fall	Serious	Other Outcomes;Hospitalized	Not Specified	12-NOV-2017	27-NOV-2018	Expedited	Not Specified	Not Specified	Ge Healthcare	Healthcare Professional	Not Specified	Nicergoline;Bio-Three;Ketoprofen;Magnesium Oxide	21-NOV-2017	27-NOV-2018	JP	Not Specified	JP-GE HEALTHCARE LIFE SCIENCES-2017CSU003990	-	-
152	123	14711260	Vizamyl	Flutemetamol F-18	Dementia	Headache	Serious	Other Outcomes	Female	17-DEC-2014	03-APR-2018	Expedited	62 YR	71 KG	Ge Healthcare	Healthcare Professional	Not Specified	Omeprazole;Celiprolol;Aspirin Lysine;Vitamin E;Ramipril;Rosuvastatin;Omega-3 Fatty Acids	30-JUN-2015	03-APR-2018	FR	Not Specified	FR-GE HEALTHCARE LIFE SCIENCES-PET1-PR-1507S-0011	-	-
153	124	14309333	Vizamyl	Flutemetamol F-18	Product Used For Unknown Indication	Cough;Abdominal Discomfort;Influenza Like Illness;Flushing;Abdominal Distension	Non-Serious	Non-Serious	Female	30-NOV-2017	20-DEC-2017	Non-Expedited	72 YR	Not Specified	Ge Healthcare	Healthcare Professional	Not Specified	-	01-DEC-2017	20-DEC-2017	US	Not Specified	US-GE HEALTHCARE LIFE SCIENCES-2017CSU003966	-	-
154	125	13844482	Vizamyl	Flutemetamol F-18	Product Used For Unknown Indication	Vision Blurred	Non-Serious	Non-Serious	Female	10-NOV-2016	08-AUG-2017	Non-Expedited	Not Specified	Not Specified	Ge Healthcare	Healthcare Professional	Not Specified	-	17-NOV-2016	08-AUG-2017	US	Not Specified	US-GE HEALTHCARE LIFE SCIENCES-PET1-PR-1611S-0020	-	-
155	126	13782117	Vizamyl	Flutemetamol F-18	Product Used For Unknown Indication	Flushing;Dyspnoea	Non-Serious	Non-Serious	Not Specified	14-DEC-2016	24-JUL-2017	Non-Expedited	Not Specified	Not Specified	Ge Healthcare	Healthcare Professional	Not Specified	-	14-DEC-2016	24-JUL-2017	US	Not Specified	US-GE HEALTHCARE LIFE SCIENCES-PET1-PR-1612S-0021	-	-
156	127	13594095	Vizamyl	Flutemetamol F-18	Atrial Fibrillation;Benign Prostatic Hyperplasia;Blood Cholesterol Increased;Constipation;Hypertension;Product Used For Unknown Indication;Type 2 Diabetes Mellitus;Vitamin D Deficiency	Amnesia	Non-Serious	Non-Serious	Male	17-MAY-2017	08-JUN-2017	Expedited	91 YR	75 KG	Ge Healthcare	Healthcare Professional	Not Specified	Cholecalciferol;Simvastatin;Herbals\Plantago Ovata Leaf;Metformin Hydrochloride;Dutasteride;Phenprocoumon;Metoprolol Succinate;Perindopril	31-MAY-2017	30-MAY-2017	NL	Not Specified	NL-GE HEALTHCARE LIFE SCIENCES-2017CSU001473	-	-
157	128	12776593	-	Flutemetamol F-18	Diagnostic Procedure;Product Used For Unknown Indication	No Adverse Event;Radioisotope Scan Abnormal	Non-Serious	Non-Serious	Not Specified	-	23-SEP-2016	Non-Expedited	Not Specified	Not Specified	Ge Healthcare	Healthcare Professional	Not Specified	-	03-AUG-2016	23-SEP-2016	US	Not Specified	US-GE HEALTHCARE MEDICAL DIAGNOSTICS-PET1-PR-1609S-0015	-	-
158	129	12776555	-	Flutemetamol F-18	Diagnostic Procedure;Product Used For Unknown Indication	No Adverse Event;Radioisotope Scan Abnormal	Non-Serious	Non-Serious	Not Specified	-	23-SEP-2016	Non-Expedited	Not Specified	Not Specified	Ge Healthcare	Healthcare Professional	Not Specified	-	03-AUG-2016	23-SEP-2016	US	Not Specified	US-GE HEALTHCARE MEDICAL DIAGNOSTICS-PET1-PR-1609S-0016	-	-
159	130	12772138	-	Flutemetamol F-18	Diagnostic Procedure;Product Used For Unknown Indication	No Adverse Event;Radioisotope Scan Abnormal	Non-Serious	Non-Serious	Not Specified	-	22-SEP-2016	Non-Expedited	Not Specified	Not Specified	Ge Healthcare	Healthcare Professional	Not Specified	-	03-AUG-2016	22-SEP-2016	US	Not Specified	US-GE HEALTHCARE MEDICAL DIAGNOSTICS-PET1-PR-1608S-0013	-	-
160	131	12770995	-	Flutemetamol F-18	Dementia Alzheimer's Type;Diagnostic Procedure	Loss Of Consciousness;Dizziness	Non-Serious	Non-Serious	Female	27-JUL-2016	22-SEP-2016	Non-Expedited	80 YR	Not Specified	Ge Healthcare	Healthcare Professional	Not Specified	-	28-JUL-2016	22-SEP-2016	US	Not Specified	US-GE HEALTHCARE MEDICAL DIAGNOSTICS-PET1-PR-1607S-0012	-	-
161	132	12699563	-	Flutemetamol F-18	Diagnostic Procedure;Product Used For Unknown Indication	Contusion	Serious	Hospitalized	Not Specified	02-JUN-2016	30-AUG-2016	Expedited	Not Specified	Not Specified	Ge Healthcare	Healthcare Professional	Not Specified	-	03-JUN-2016	30-AUG-2016	JP	Not Specified	JP-GE HEALTHCARE MEDICAL DIAGNOSTICS-PET1-PR-1606S-0008	-	-
162	133	11950237	-	Flutemetamol F-18	Diagnostic Procedure;Prodromal Alzheimer's Disease;Product Used For Unknown Indication	No Adverse Event;Overdose	Non-Serious	Non-Serious	Male	24-NOV-2015	09-AUG-2016	Expedited	71 YR	75.3 KG	Ge Healthcare	Healthcare Professional	Not Specified	Calcium;Cholecalciferol;Aspirin;Vitamins Nos;Metrogel;Verubecestat;Ascorbic Acid;Fluocinonide;Aleve	04-JAN-2016	26-JAN-2016	US	Not Specified	US-GE HEALTHCARE MEDICAL DIAGNOSTICS-PET1-PR-1601S-0001	-	-
163	134	11293308	-	Flutemetamol F-18	Diagnostic Procedure;Product Used For Unknown Indication	Headache;Lethargy;Drug Hypersensitivity;Blood Pressure Increased;Sinus Disorder	Non-Serious	Non-Serious	Female	MAY-2015	22-JUL-2015	Non-Expedited	77 YR	69.46 KG	Ge Healthcare	Healthcare Professional	Not Specified	-	29-MAY-2015	22-JUL-2015	US	Not Specified	US-GE HEALTHCARE MEDICAL DIAGNOSTICS-PET1-PR-1505S-0007	-	-
164	135	11032110	-	Flutemetamol F-18	Diagnostic Procedure;Product Used For Unknown Indication	Blood Pressure Increased;Overdose	Non-Serious	Non-Serious	Not Specified	18-MAR-2015	21-JUL-2015	Non-Expedited	58 YR	83 KG	Ge Healthcare	Healthcare Professional	Not Specified	-	05-JUN-2015	15-APR-2015	US	Not Specified	US-GE HEALTHCARE MEDICAL DIAGNOSTICS-PET1-PR-1503S-0003	-	-
165	136	11032084	-	Flutemetamol F-18	Diagnostic Procedure;Product Used For Unknown Indication	Blood Pressure Increased;Overdose	Non-Serious	Non-Serious	Not Specified	18-MAR-2015	21-JUL-2015	Non-Expedited	79 YR	83.7 KG	Ge Healthcare	Healthcare Professional	Not Specified	Donepezil;Aspirin;Atorvastatin;Benazepril Hydrochloride;Metoprolol;Allopurinol;Clopidogrel;Glimepiride	05-JUN-2015	15-APR-2015	US	Not Specified	US-GE HEALTHCARE MEDICAL DIAGNOSTICS-PET1-PR-1503S-0002	-	-
166	1	23996095	Axumin	Fluciclovine F-18	Positron Emission Tomogram	Positron Emission Tomogram Abnormal	Non-Serious	Non-Serious	Male	29-DEC-2023	20-JUN-2024	Expedited	Not Specified	Not Specified	Bracco	Healthcare Professional	Not Specified	Fluticasone;Metformin;Hydrochlorothiazide;Lisinopril;Omeprazole	11-JAN-2024	20-JUN-2024	US	Not Specified	US-BRACCO-2024US00135	-	-
167	2	23996094	-	Fluciclovine F-18	Positron Emission Tomogram	Therapeutic Response Unexpected	Non-Serious	Non-Serious	Male	-	20-JUN-2024	Expedited	85 YR	Not Specified	Bracco	Healthcare Professional	Not Specified	-	14-APR-2024	20-JUN-2024	US	Not Specified	US-BRACCO-2024US02151	Desai C, Clark A, Surasi DS, Flynt L.. Detection of Adenocarcinoma of the Colon on 18F-Fluciclovine PET/CT. Clinical Nuclear Medicine. 2024;00:00 - 00	-
168	3	23996091	Axumin	Fluciclovine F-18	Positron Emission Tomogram	Therapeutic Response Unexpected	Non-Serious	Non-Serious	Male	-	20-JUN-2024	Expedited	64 YR	Not Specified	Bracco	Healthcare Professional	Not Specified	Denosumab;Degarelix	05-NOV-2023	20-JUN-2024	US	Not Specified	US-BRACCO-2023US05798	Danielle A. Touma , Horace Hayes , Francis J. Cloran. 18F-Fluciclovine Uptake in an Incidentally Discovered Meningioma in a Patient With a History of Metastatic Prostate Cancer: A Case Report. Cureus 15(9): e46073. 2023	-
169	4	23996090	Axumin	Fluciclovine F-18	Positron Emission Tomogram	No Adverse Event	Non-Serious	Non-Serious	Male	-	20-JUN-2024	Expedited	46 YR	Not Specified	Bracco	Healthcare Professional	Not Specified	-	12-DEC-2023	20-JUN-2024	US	Not Specified	US-BRACCO-2023US06680	-	-
170	5	22674453	Axumin	Fluciclovine F-18	Positron Emission Tomogram	No Adverse Event	Non-Serious	Non-Serious	Male	-	05-JUL-2023	Non-Expedited	76 YR	Not Specified	Bracco	Consumer	Not Specified	-	10-JAN-2023	05-JUL-2023	US	Not Specified	US-BRACCO-2023US00081	-	-
171	6	22674452	Axumin	Fluciclovine F-18	Positron Emission Tomogram	Therapeutic Response Unexpected	Non-Serious	Non-Serious	Male	-	05-JUL-2023	Non-Expedited	64 YR	Not Specified	Bracco	Healthcare Professional	Not Specified	-	13-NOV-2022	05-JUL-2023	US	Not Specified	US-BRACCO-2022US05104	Trak J.; Hasanovic A.; Gavane S.. 18F-FDG and 18F-Fluciclovine Uptake in Poorly Differentiated Lung Adenocarcinoma in the Setting of Biochemically Recurrent Prostatic Adenocarcinoma. Clinical Nuclear Medicine. 2022;47:1077-1078	-
172	7	22674451	Axumin	Fluciclovine F-18	Positron Emission Tomogram	False Negative Investigation Result	Non-Serious	Non-Serious	Male	-	05-JUL-2023	Non-Expedited	83 YR	Not Specified	Bracco	Healthcare Professional	Not Specified	Leuprolide Acetate	29-AUG-2022	05-JUL-2023	US	Not Specified	US-BRACCO-2022US03532	-	-
173	8	22674450	Axumin	Fluciclovine F-18	Positron Emission Tomogram	Therapeutic Response Unexpected	Non-Serious	Non-Serious	Male	-	05-JUL-2023	Non-Expedited	83 YR	Not Specified	Bracco	Healthcare Professional	Not Specified	-	09-AUG-2022	05-JUL-2023	US	Not Specified	US-BRACCO-2022US03397	Marcus C., Schuster D.M., Tajmir S.H.. 18F-Fluciclovine PET/CT A Potential Imaging Biomarker for the Evaluation of Multiple Myeloma. Clinical Nuclear Medicine. 2022;47:e613–e615	-
174	9	22674449	Axumin	Fluciclovine F-18	Positron Emission Tomogram	Extravasation;Drug Ineffective	Non-Serious	Non-Serious	Male	12-JUL-2022	05-JUL-2023	Non-Expedited	Not Specified	Not Specified	Bracco	Consumer	Not Specified	-	08-SEP-2022	05-JUL-2023	US	Not Specified	US-BRACCO-2022US02995	-	-
175	10	22674448	-	Fluciclovine F-18	Positron Emission Tomogram	Therapeutic Response Unexpected	Non-Serious	Non-Serious	Male	-	05-JUL-2023	Non-Expedited	84 YR	Not Specified	Bracco	Healthcare Professional	Not Specified	-	18-AUG-2022	05-JUL-2023	US	Not Specified	US-BRACCO-2022US03483	John M. Floberg J.M.; Blitzer G.C.; Yadav P.. Use of Stereotactic Magnetic Resonance-Guided Online Adaptive Radiation Therapy for Treatment of a Pelvic Recurrence of Prostate Cancer in a Patient With an Orthotopic Neobladder. Advance in radiation oncology. 2022;7:1-5	-
176	11	22674447	Axumin	Fluciclovine F-18	Positron Emission Tomogram	Therapeutic Response Unexpected	Non-Serious	Non-Serious	Female	-	05-JUL-2023	Non-Expedited	41 YR	Not Specified	Bracco	Healthcare Professional	Not Specified	-	12-DEC-2022	05-JUL-2023	US	Not Specified	US-BRACCO-2022US05490	Lawal I.O., Adediran O.A., Muzahir S., Friend S., Bhave M.A., Meisel J., Torres M.A., Styblo T.M., Graham C.;,Holbrook A., Kalinsky K., Fielder B., Crowe R.J., Ulaner G.A., Schuster D.M.. A Tale of 3 Tracers Contrasting Uptake Patterns of 18F-Fluciclovine, 68Ga-PSMA, and 18F-FDG in the Uterus and Adnexa. Clinical Nuclear Medicine. 2023;48:26-27	-
177	12	22674446	-	Fluciclovine F-18	Positron Emission Tomogram	Therapeutic Response Unexpected	Non-Serious	Non-Serious	Female	-	05-JUL-2023	Non-Expedited	62 YR	Not Specified	Bracco	Healthcare Professional	Not Specified	-	05-FEB-2023	05-JUL-2023	US	Not Specified	US-BRACCO-2023US00464	Adediran A. O., Lawal O. I., Muzahir S., Bhave A. M., Friend S., Fielder B., Meisel J., Torres A. M., Styblo M. T., Graham C., Holbrook A., Kalinsky K., Crowe J. R., Ulaner A. G., Schuster M. D. A Discordant Pattern of Uptake on 68Ga-PSMA PET/CT Versus 18F-Fluciclovine PET/CT in Radiation-Induced Hepatitis. Implications for Early Postradiotherapy Imaging-Based Response Assessment.. Clinical Nucle…	-
178	13	21097182	Axumin	Fluciclovine F-18	Computerised Tomogram;Positron Emission Tomogram	No Adverse Event;Injection Site Extravasation	Non-Serious	Non-Serious	Male	08-FEB-2022	19-JUL-2022	Non-Expedited	74 YR	Not Specified	Bracco	Consumer	Not Specified	Sodium Chloride	22-MAR-2022	19-JUL-2022	US	Not Specified	US-BRACCO-2022US01044	-	-
179	14	21097181	Axumin	Fluciclovine F-18	Positron Emission Tomogram	Therapeutic Response Unexpected	Non-Serious	Non-Serious	Male	-	19-JUL-2022	Non-Expedited	77 YR	Not Specified	Bracco	Healthcare Professional	Not Specified	-	10-APR-2022	19-JUL-2022	US	Not Specified	US-BRACCO-2022US01422	Gill H.S., MD,Tade F., Greenwald D.T., Yonover P.M., MD,Savir-Baruch B.. Metastatic Male Breast Cancer With Increased Uptake on 18F-Fluciclovine PET/CT Scan. Clinical Nuclear Medicine. 2018;43:23-24	-
180	15	21097180	Axumin	Fluciclovine F-18	Positron Emission Tomogram	Wrong Product Administered	Non-Serious	Non-Serious	Male	16-MAR-2022	19-JUL-2022	Non-Expedited	Not Specified	Not Specified	Bracco	Consumer	Not Specified	-	16-MAR-2022	19-JUL-2022	US	Not Specified	US-BRACCO-2022US01000	-	-
181	16	21097179	Axumin	Fluciclovine F-18	Diagnostic Procedure	Off Label Use	Non-Serious	Non-Serious	Male	-	19-JUL-2022	Non-Expedited	Not Specified	Not Specified	Bracco	Consumer	Not Specified	-	27-JAN-2022	19-JUL-2022	US	Not Specified	US-BRACCO-2022US00321	-	-
182	17	21097178	Axumin	Fluciclovine F-18	Positron Emission Tomogram	Injection Site Extravasation;Therapeutic Product Effect Decreased	Non-Serious	Non-Serious	Male	07-DEC-2021	19-JUL-2022	Non-Expedited	77 YR	Not Specified	Bracco	Healthcare Professional	Not Specified	-	19-JAN-2022	19-JUL-2022	US	Not Specified	US-BRACCO-2022US00209	-	-
183	18	21097177	Axumin	Fluciclovine F-18	Positron Emission Tomogram	No Adverse Event;Therapeutic Response Unexpected	Non-Serious	Non-Serious	Male	18-FEB-2022	19-JUL-2022	Non-Expedited	Not Specified	Not Specified	Bracco	Healthcare Professional	Not Specified	Tamsulosin;Calcium\Cholecalciferol;Carvedilol;Acetaminophen;Finasteride;Aspirin;Losartan	25-FEB-2022	19-JUL-2022	US	Not Specified	US-BRACCO-2022US00691	-	-
184	19	21097176	Axumin	Fluciclovine F-18	Positron Emission Tomogram	Fatigue;Abdominal Discomfort;Diarrhoea;Muscle Spasms	Non-Serious	Non-Serious	Male	18-JAN-2022	19-JUL-2022	Non-Expedited	Not Specified	Not Specified	Bracco	Healthcare Professional	Not Specified	Losartan;Cialis;Valtrex;Zyrtec;Vitamin C;Montelukast	21-JAN-2022	19-JUL-2022	US	Not Specified	US-BRACCO-2022US00248	-	-
185	20	21097175	Axumin	Fluciclovine F-18	Positron Emission Tomogram	Drug Ineffective;No Adverse Event	Non-Serious	Non-Serious	Male	08-MAR-2022	19-JUL-2022	Non-Expedited	Not Specified	Not Specified	Bracco	Consumer	Not Specified	-	23-MAR-2022	19-JUL-2022	US	Not Specified	US-BRACCO-2022US00895	-	-
186	21	21097174	Axumin	Fluciclovine F-18	Positron Emission Tomogram	Therapeutic Response Unexpected	Non-Serious	Non-Serious	Male	-	19-JUL-2022	Non-Expedited	76 YR	Not Specified	Bracco	Healthcare Professional	Not Specified	-	03-APR-2022	19-JUL-2022	US	Not Specified	US-BRACCO-2022US01311	Lu Y. Imaging Characteristics of Coexisting Metastatic Papillary Thyroid Cancer and Prostate Cancer on 18F-Fluciclovine and 68Ga-PSMA-11 PET/CT. Clinical Nuclear Medicine. 2022;00:00-00	-
187	22	21097173	Axumin	Fluciclovine F-18	Positron Emission Tomogram	No Adverse Event;Injection Site Extravasation	Non-Serious	Non-Serious	Male	02-FEB-2022	19-JUL-2022	Non-Expedited	74 YR	Not Specified	Bracco	Not Specified	Not Specified	Sodium Chloride	22-MAR-2022	19-JUL-2022	US	Not Specified	US-BRACCO-2022US01043	-	-
188	23	21097172	Axumin	Fluciclovine F-18	Positron Emission Tomogram	Therapeutic Response Unexpected	Non-Serious	Non-Serious	Male	-	19-JUL-2022	Non-Expedited	65 YR	Not Specified	Bracco	Healthcare Professional	Not Specified	-	04-OCT-2021	19-JUL-2022	US	Not Specified	US-BRACCO-2021US04277	Aldine A.S., Balaawi K., Saadeddin A., Shariftabrizi A., Kandemirl S.. Multifocal Meningiomas Mimicking Metastasis on 18F-Fluciclovine PET/CT.. Nuclear Medicine and Molecular Imaging. 2021	-
189	24	21097171	Axumin	Fluciclovine F-18	Positron Emission Tomogram	Off Label Use;No Adverse Event	Non-Serious	Non-Serious	Male	19-JAN-2022	19-JUL-2022	Non-Expedited	59 YR	Not Specified	Bracco	Consumer	Not Specified	-	19-JAN-2022	19-JUL-2022	US	Not Specified	US-BRACCO-2022US00207	-	-
190	25	21097170	Axumin	Fluciclovine F-18	Positron Emission Tomogram	False Positive Investigation Result;Positron Emission Tomogram Abnormal	Non-Serious	Non-Serious	Male	-	19-JUL-2022	Non-Expedited	65 YR	Not Specified	Bracco	Not Specified	Not Specified	-	10-DEC-2021	19-JUL-2022	US	Not Specified	US-BRACCO-2021US05348	-	-
191	26	21097169	Axumin	Fluciclovine F-18	Positron Emission Tomogram	Off Label Use;Therapeutic Response Unexpected	Non-Serious	Non-Serious	Male	-	19-JUL-2022	Non-Expedited	86 YR	Not Specified	Bracco	Not Specified	Not Specified	-	05-NOV-2021	19-JUL-2022	US	Not Specified	US-BRACCO-2021US04814	-	-
192	27	21097168	Axumin	Fluciclovine F-18	Positron Emission Tomogram	Therapeutic Response Unexpected	Non-Serious	Non-Serious	Male	-	19-JUL-2022	Non-Expedited	71 YR	Not Specified	Bracco	Not Specified	Not Specified	-	14-JAN-2022	19-JUL-2022	US	Not Specified	US-BRACCO-2022US00154	-	-
193	28	21097167	Axumin	Fluciclovine F-18	Positron Emission Tomogram	Off Label Use;No Adverse Event;Therapeutic Response Unexpected	Non-Serious	Non-Serious	Male	-	19-JUL-2022	Non-Expedited	Not Specified	Not Specified	Bracco	Healthcare Professional	Not Specified	-	20-OCT-2021	19-JUL-2022	US	Not Specified	US-BRACCO-2021US04274	-	-
194	29	21097166	Axumin	Fluciclovine F-18	Positron Emission Tomogram	Therapeutic Response Unexpected	Non-Serious	Non-Serious	Male	-	19-JUL-2022	Non-Expedited	60 YR	Not Specified	Bracco	Not Specified	Not Specified	-	14-JAN-2022	19-JUL-2022	US	Not Specified	US-BRACCO-2022US00155	Marcus C., Baugnon K., Schuster D.M. Incidental Spinal Meningioma on an 18F-Fluciclovine PET/CT. Clinical Nuclear Medicine. 2022;00 (00):1-2	-
195	30	21097165	Axumin	Fluciclovine F-18	Positron Emission Tomogram	Positron Emission Tomogram Abnormal;No Adverse Event	Non-Serious	Non-Serious	Male	-	19-JUL-2022	Non-Expedited	Not Specified	Not Specified	Bracco	Healthcare Professional	Not Specified	Niacin;Lorazepam;Prilosec;Melatonin;Sodium Chloride	28-JUL-2021	19-JUL-2022	US	Not Specified	US-BRACCO-2021US03092	-	-
196	31	21097164	Axumin	Fluciclovine F-18	Positron Emission Tomogram	Drug Ineffective;No Adverse Event;Injection Site Extravasation	Non-Serious	Non-Serious	Male	28-JUL-2021	19-JUL-2022	Non-Expedited	Not Specified	Not Specified	Bracco	Healthcare Professional	Not Specified	-	11-AUG-2021	19-JUL-2022	US	Not Specified	US-BRACCO-2021US03498	-	-
197	32	21097163	Axumin	Fluciclovine F-18	Positron Emission Tomogram	Positron Emission Tomogram Abnormal	Non-Serious	Non-Serious	Male	24-JUN-2021	19-JUL-2022	Non-Expedited	Not Specified	Not Specified	Bracco	Healthcare Professional	Not Specified	-	24-JUN-2021	19-JUL-2022	US	Not Specified	US-BRACCO-2021US02777	-	-
198	33	21097162	Axumin	Fluciclovine F-18	Positron Emission Tomogram	False Positive Investigation Result	Non-Serious	Non-Serious	Male	-	19-JUL-2022	Non-Expedited	73 YR	Not Specified	Bracco	Healthcare Professional	Not Specified	-	01-OCT-2021	19-JUL-2022	US	Not Specified	US-BRACCO-2021US04231	Baldeosingh SC, Rowe SP, Greco SC, Paller CJ, Goel R.. F-Fluciclovine–Avid Pulmonary Hamartoma. Journal of Clinical Nuclear Medicine. 2021;00	-
199	34	21097161	Axumin	Fluciclovine F-18	Positron Emission Tomogram	Positron Emission Tomogram Abnormal;Decreased Activity	Non-Serious	Non-Serious	Male	-	19-JUL-2022	Non-Expedited	Not Specified	Not Specified	Bracco	Healthcare Professional	Not Specified	-	08-SEP-2021	19-JUL-2022	US	Not Specified	US-BRACCO-2021US03918	-	-
200	35	21097160	Axumin	Fluciclovine F-18	Positron Emission Tomogram	Drug Ineffective;Extravasation;No Adverse Event	Non-Serious	Non-Serious	Male	07-OCT-2021	19-JUL-2022	Non-Expedited	Not Specified	Not Specified	Bracco	Consumer	Not Specified	Sodium Chloride	01-DEC-2021	19-JUL-2022	US	Not Specified	US-BRACCO-2021US05028	-	-
201	36	21097159	Axumin	Fluciclovine F-18	Positron Emission Tomogram	Positron Emission Tomogram Abnormal	Non-Serious	Non-Serious	Male	-	19-JUL-2022	Non-Expedited	Not Specified	Not Specified	Bracco	Healthcare Professional	Not Specified	-	01-SEP-2021	19-JUL-2022	US	Not Specified	US-BRACCO-2021US04030	-	-
202	37	21097158	Axumin	Fluciclovine F-18	Positron Emission Tomogram	Positron Emission Tomogram Abnormal	Non-Serious	Non-Serious	Male	-	19-JUL-2022	Non-Expedited	Not Specified	Not Specified	Bracco	Healthcare Professional	Not Specified	-	13-JUL-2021	19-JUL-2022	US	Not Specified	US-BRACCO-2021US03084	-	-
203	38	21097157	Axumin	Fluciclovine F-18	Positron Emission Tomogram	False Positive Investigation Result;Positron Emission Tomogram Abnormal	Non-Serious	Non-Serious	Male	-	19-JUL-2022	Non-Expedited	60 YR	Not Specified	Bracco	Healthcare Professional	Not Specified	-	17-SEP-2021	19-JUL-2022	US	Not Specified	US-BRACCO-2021US03990	Surasi DSS, Lin L, Ravizzini G, Wong F.. Supraclavicular and Axillary Lymphadenopathy Induced by COVID-19 Vaccination on 18F-Fluorthanatrace, 68Ga-DOTATATE,and 18F-Fluciclovine PET/CT. Clinical Nuclear Medicine. 2021;00:00-00	-
204	39	21097156	Axumin	Fluciclovine F-18	Positron Emission Tomogram	Positron Emission Tomogram Abnormal;Inappropriate Schedule Of Product Administration;Injection Site Extravasation	Non-Serious	Non-Serious	Male	31-AUG-2021	19-JUL-2022	Non-Expedited	73 YR	Not Specified	Bracco	Healthcare Professional	Not Specified	-	31-AUG-2021	19-JUL-2022	US	Not Specified	US-BRACCO-2021US03781	-	-
205	40	21097155	Axumin	Fluciclovine F-18	Positron Emission Tomogram	Positron Emission Tomogram Abnormal	Non-Serious	Non-Serious	Male	-	19-JUL-2022	Non-Expedited	74 YR	Not Specified	Bracco	Healthcare Professional	Not Specified	-	30-JUN-2021	19-JUL-2022	US	Not Specified	US-BRACCO-2021US02959	Wong F. C., MD, Martiniova L., Masrani A., Ravizzini G. C., MD. 18F-Fluciclovine–Avid Reactive Axillary Lymph Nodes After COVID-19 Vaccination. Clinical Nuclear Medicine. 2021;00:1-2	-
206	41	21097131	Axumin	Fluciclovine F-18	Positron Emission Tomogram	Drug Ineffective;False Negative Investigation Result	Non-Serious	Non-Serious	Male	24-MAR-2021	19-JUL-2022	Non-Expedited	Not Specified	Not Specified	Bracco	Consumer	Not Specified	Lupron;Finasteride	04-JUN-2021	19-JUL-2022	US	Not Specified	US-BRACCO-2021US01483	-	-
207	42	20790680	-	Fluciclovine F-18	Bladder Cancer	White Blood Cells Urine Positive;Dehydration;Blood Creatinine Increased;Bacterial Test Positive;Urinary Tract Infection;Tachycardia;Malaise	Serious	Hospitalized	Male	28-APR-2022	05-MAY-2022	Direct	72 YR	58.5 KG	Fda-Ctu	Consumer	Not Specified	-	-	05-MAY-2022	Not Specified	Y	-	-	Yes
208	43	17656344	Amyvid;Axumin	Fluciclovine F-18;Florbetapir F-18	Product Used For Unknown Indication	Wrong Product Administered	Non-Serious	Non-Serious	Not Specified	-	10-APR-2020	Non-Expedited	Not Specified	Not Specified	Eli Lilly And Co	Healthcare Professional	Not Specified	-	08-APR-2020	10-APR-2020	US	Not Specified	US-ELI_LILLY_AND_COMPANY-US202004004125	-	-
209	44	17144661	Axumin	Fluciclovine F-18	Positron Emission Tomogram;Prostate Cancer Metastatic	Confusional State;Hyponatraemia;Epilepsy	Serious	Hospitalized;Other Outcomes	Male	23-NOV-2019	19-MAR-2020	Expedited	77 YR	Not Specified	Blue Earth Diagnostics	Healthcare Professional	Not Specified	-	04-MAR-2020	12-DEC-2019	BE	Not Specified	BE-BLUE EARTH DIAGNOSTICS LIMITED-BED-000105-2019	-	-
210	45	16533750	-	Fluciclovine F-18	Positron Emission Tomogram	Therapeutic Response Unexpected	Non-Serious	Non-Serious	Male	-	04-JUL-2019	Non-Expedited	66 YR	Not Specified	Blue Earth Diagnostics	Healthcare Professional	Not Specified	-	05-MAY-2019	04-JUL-2019	US	Not Specified	US-BLUE EARTH DIAGNOSTICS LIMITED-BED-000033-2019	Jethanandani A Chen MM Gule-Monroe MK Morrison WH Lai SY Johnson JM. Incidental detection of oropharyngeal cancer with fluciclovine PET. Head & Neck. 2019;1-5	-
211	46	16533741	Axumin	Fluciclovine F-18	Positron Emission Tomogram	Scan Abnormal	Non-Serious	Non-Serious	Not Specified	-	04-JUL-2019	Non-Expedited	Not Specified	Not Specified	Blue Earth Diagnostics	Healthcare Professional	Not Specified	-	03-MAY-2019	04-JUL-2019	US	Not Specified	US-BLUE EARTH DIAGNOSTICS LIMITED-BED-000034-2019	-	-
212	47	16533721	Axumin	Fluciclovine F-18	Positron Emission Tomogram	Rash	Non-Serious	Non-Serious	Male	-	04-JUL-2019	Non-Expedited	Not Specified	Not Specified	Blue Earth Diagnostics	Consumer	Not Specified	-	12-APR-2019	04-JUL-2019	US	Not Specified	US-BLUE EARTH DIAGNOSTICS LIMITED-BED-000021-2019	-	-
213	48	16533720	Axumin	Fluciclovine F-18	Scan	Scan Abnormal	Non-Serious	Non-Serious	Male	-	04-JUL-2019	Non-Expedited	Not Specified	Not Specified	Blue Earth Diagnostics	Consumer	Not Specified	-	11-APR-2019	04-JUL-2019	US	Not Specified	US-BLUE EARTH DIAGNOSTICS LIMITED-BED-000020-2019	-	-
214	49	16533686	Axumin	Fluciclovine F-18	Diabetes Mellitus;Positron Emission Tomogram	Scan Abnormal	Non-Serious	Non-Serious	Not Specified	-	04-JUL-2019	Non-Expedited	Not Specified	Not Specified	Blue Earth Diagnostics	Healthcare Professional	Not Specified	Metformin	29-MAR-2019	04-JUL-2019	US	Not Specified	US-BLUE EARTH DIAGNOSTICS LIMITED-BED-000019-2019	-	-
215	50	16533657	-	Fluciclovine F-18	Hormone Suppression Therapy;Positron Emission Tomogram	Therapeutic Response Unexpected	Non-Serious	Non-Serious	Male	-	04-JUL-2019	Non-Expedited	79 YR	Not Specified	Blue Earth Diagnostics	Healthcare Professional	Not Specified	Leuprolide;Bicalutamide	18-MAR-2019	04-JUL-2019	US	Not Specified	US-BLUE EARTH DIAGNOSTICS LIMITED-BED-000018-2019	Raghavan K Wen KW Small EJ Ha P Flavell RR. Incidentally Detected Oropharyngeal Squamous Cell Carcinoma on 18F-Fluciclovine PET/CT. Clinical Nuclear Medicine. 2019	-
216	51	16531488	Axumin	Fluciclovine F-18	Scan	Scan Abnormal	Non-Serious	Non-Serious	Male	-	04-JUL-2019	Non-Expedited	Not Specified	Not Specified	Blue Earth Diagnostics	Healthcare Professional	Not Specified	-	04-MAR-2019	04-JUL-2019	US	Not Specified	US-BLUE EARTH DIAGNOSTICS LIMITED-BED-000017-2019	-	-
217	52	16531467	Axumin	Fluciclovine F-18	Product Used For Unknown Indication	Manufacturing Product Shipping Issue;Product Dose Omission Issue	Non-Serious	Non-Serious	Not Specified	-	04-JUL-2019	Non-Expedited	Not Specified	Not Specified	Blue Earth Diagnostics	Healthcare Professional	Not Specified	-	16-JAN-2019	04-JUL-2019	CZ	Not Specified	CZ-BLUE EARTH DIAGNOSTICS LIMITED-BED-000014-2019	-	-
218	53	16531456	Axumin	Fluciclovine F-18	Scan	Scan Abnormal	Non-Serious	Non-Serious	Male	19-FEB-2019	04-JUL-2019	Non-Expedited	82 YR	Not Specified	Blue Earth Diagnostics	Healthcare Professional	Not Specified	-	04-MAR-2019	04-JUL-2019	US	Not Specified	US-BLUE EARTH DIAGNOSTICS LIMITED-BED-000016-2019	-	-
219	54	16531400	Axumin	Fluciclovine F-18	Product Used For Unknown Indication	Product Dose Omission Issue;Manufacturing Product Shipping Issue	Non-Serious	Non-Serious	Not Specified	-	04-JUL-2019	Non-Expedited	Not Specified	Not Specified	Blue Earth Diagnostics	Healthcare Professional	Not Specified	-	16-JAN-2019	04-JUL-2019	CZ	Not Specified	CZ-BLUE EARTH DIAGNOSTICS LIMITED-BED-000011-2019	-	-
220	55	16531365	Axumin	Fluciclovine F-18	Computerised Tomogram;Prostate Cancer	Vertigo;Dizziness;Vomiting;Diarrhoea;Nausea;Malaise	Non-Serious	Non-Serious	Male	30-NOV-2018	04-JUL-2019	Non-Expedited	Not Specified	75 KG	Blue Earth Diagnostics	Healthcare Professional	Not Specified	-	04-DEC-2018	04-JUL-2019	FR	Not Specified	FR-BLUE EARTH DIAGNOSTICS LIMITED-BED-000072-2018	-	-
221	56	16526681	Axumin	Fluciclovine F-18	Positron Emission Tomography-Magnetic Resonance Imaging	Anxiety	Non-Serious	Non-Serious	Male	-	04-JUL-2019	Non-Expedited	16 YR	Not Specified	Blue Earth Diagnostics	Healthcare Professional	Not Specified	-	26-MAY-2019	04-JUL-2019	NO	Not Specified	NO-BLUE EARTH DIAGNOSTICS LIMITED-BED-000040-2019	Karlberg A Berntsen EM Johansen H Skjulsvik AJ Reinertsen I Dai HY Xiao Y Rivaz H Borghammer P Solheim O Eikenes L. 18F-FACBC PET/MRI in Diagnostic Assessment and Neurosurgery of Gliomas. Clinical Nuclear Medicine. 2019	-
222	57	16526675	Axumin	Fluciclovine F-18	Positron Emission Tomogram	Therapeutic Response Unexpected	Non-Serious	Non-Serious	Male	-	04-JUL-2019	Non-Expedited	78 YR	Not Specified	Blue Earth Diagnostics	Healthcare Professional	Not Specified	-	26-MAY-2019	04-JUL-2019	US	Not Specified	US-BLUE EARTH DIAGNOSTICS LIMITED-BED-000039-2019	Manganaro MS Millet JD Manganaro MS. Multifocal Meningiomas Mimicking Dural-Based Intracranial Metastases at 18F-Fluciclovine PET/CT. Clinical Nuclear Medicine. 2019	-
223	58	16526671	-	Fluciclovine F-18	Positron Emission Tomogram	Death	Serious	Died	Male	19-MAR-2019	04-JUL-2019	Non-Expedited	73 YR	65.3 KG	Blue Earth Diagnostics	Healthcare Professional	Not Specified	-	21-MAY-2019	04-JUL-2019	US	Not Specified	US-BLUE EARTH DIAGNOSTICS LIMITED-BED-000037-2019	-	-
224	59	16526660	Axumin	Fluciclovine F-18	Positron Emission Tomogram	Scan Abnormal	Non-Serious	Non-Serious	Not Specified	-	04-JUL-2019	Non-Expedited	Not Specified	Not Specified	Blue Earth Diagnostics	Consumer	Not Specified	-	06-MAY-2019	04-JUL-2019	US	Not Specified	US-BLUE EARTH DIAGNOSTICS LIMITED-BED-000036-2019	-	-
225	60	16526653	Axumin	Fluciclovine F-18	Prostate Cancer	Dysstasia;Gait Disturbance;Pain In Extremity	Non-Serious	Non-Serious	Male	10-MAY-2019	04-JUL-2019	Non-Expedited	63 YR	Not Specified	Blue Earth Diagnostics	Consumer	Not Specified	-	13-MAY-2019	04-JUL-2019	US	Not Specified	US-BLUE EARTH DIAGNOSTICS LIMITED-BED-000035-2019	-	-
226	61	15065129	Axumin	Fluciclovine F-18	Product Used For Unknown Indication;Prostate Cancer	Taste Disorder	Non-Serious	Non-Serious	Male	-	26-JUN-2018	Non-Expedited	69 YR	Not Specified	Blue Earth Diagnostics	Consumer	Not Specified	Lupron	09-MAR-2018	26-JUN-2018	US	Not Specified	US-BLUE EARTH DIAGNOSTICS LIMITED-BED-000004-2018	-	-
227	62	15065128	Axumin	Fluciclovine F-18	Glioma;Positron Emission Tomogram	Condition Aggravated;Glioblastoma	Serious	Died	Female	30-NOV-2006	26-JUN-2018	Non-Expedited	44 YR	84 KG	Blue Earth Diagnostics	Healthcare Professional	Not Specified	Temodar;Avastin;Perifosine	17-APR-2018	26-JUN-2018	US	Not Specified	US-BLUE EARTH DIAGNOSTICS LIMITED-BED-000018-2018	-	-
228	63	15065126	Axumin	Fluciclovine F-18	Scan	Scan Abnormal	Non-Serious	Non-Serious	Not Specified	-	26-JUN-2018	Non-Expedited	Not Specified	Not Specified	Blue Earth Diagnostics	Consumer	Not Specified	-	24-APR-2018	26-JUN-2018	US	Not Specified	US-BLUE EARTH DIAGNOSTICS LIMITED-BED-000020-2018	-	-
229	64	15065125	Axumin	Fluciclovine F-18	Scan	Agitation;Claustrophobia	Non-Serious	Non-Serious	Not Specified	-	26-JUN-2018	Non-Expedited	Not Specified	Not Specified	Blue Earth Diagnostics	Healthcare Professional	Not Specified	-	21-MAR-2018	26-JUN-2018	US	Not Specified	US-BLUE EARTH DIAGNOSTICS LIMITED-BED-000014-2018	-	-
230	65	15065118	-	Fluciclovine F-18	Positron Emission Tomogram	False Negative Investigation Result	Non-Serious	Non-Serious	Male	-	26-JUN-2018	Non-Expedited	58 YR	Not Specified	Blue Earth Diagnostics	Healthcare Professional	Not Specified	-	20-MAR-2018	26-JUN-2018	CA	Not Specified	CA-BLUE EARTH DIAGNOSTICS LIMITED-BED-000012-2018	Chausse G Abikhzer G Probst S. Small Lymph Node Metastasis Detected by 68Ga-Prostate-Specific Membrane Antigen But Not 18F-Fluciclovine PET/CT in Low-Prostate-Specific Antigen Biochemical Recurrence of Prostate Cancer. Journal of Nuclear Medicine. 2018;43:250-251	-
231	66	15060192	Axumin	Fluciclovine F-18	Positron Emission Tomogram	False Negative Investigation Result	Non-Serious	Non-Serious	Male	-	25-JUN-2018	Non-Expedited	70 YR	Not Specified	Blue Earth Diagnostics	Healthcare Professional	Not Specified	-	09-MAR-2018	25-JUN-2018	US	Not Specified	US-BLUE EARTH DIAGNOSTICS LIMITED-BED-000011-2018	Calais J Fendler WP Herrmann K Eiber M Ceci F. Head-to-head comparison of 68GA-PSMA-11 and 18F-Fluciclovine PET/CT in a case series of 10 patients with prostate cancer recurrance. Journal of Nuclear Medicine. 2017	-
232	67	15060187	Axumin	Fluciclovine F-18	Positron Emission Tomogram	False Negative Investigation Result	Non-Serious	Non-Serious	Male	-	25-JUN-2018	Non-Expedited	78 YR	Not Specified	Blue Earth Diagnostics	Healthcare Professional	Not Specified	-	09-MAR-2018	25-JUN-2018	US	Not Specified	US-BLUE EARTH DIAGNOSTICS LIMITED-BED-000009-2018	Calais J Fendler PW Herrmann K Eiber M Ceci F. Head-to-head comparison of 68GA-PSMA-11 and 18F-Fluciclovine PET/CT in a case series of 10 patients with prostate cancer recurrance. Journal of Nuclear Medicine. 2017	-
233	68	15060186	Axumin	Fluciclovine F-18	Positron Emission Tomogram	False Negative Investigation Result	Non-Serious	Non-Serious	Male	-	25-JUN-2018	Non-Expedited	76 YR	Not Specified	Blue Earth Diagnostics	Healthcare Professional	Not Specified	-	09-MAR-2018	25-JUN-2018	US	Not Specified	US-BLUE EARTH DIAGNOSTICS LIMITED-BED-000008-2018	Calais J Fendler PW Herrmann K Eibner M Ceci F. Head-to-head comparison of 68GA-PSMA-11 and 18F-Fluciclovine PET/CT in a case series of 10 patients with prostate cancer recurrence. Journal of Nuclear Medicine. 2017	-
234	69	15060185	Axumin	Fluciclovine F-18	Positron Emission Tomogram	False Negative Investigation Result	Non-Serious	Non-Serious	Male	-	25-JUN-2018	Non-Expedited	65 YR	Not Specified	Blue Earth Diagnostics	Healthcare Professional	Not Specified	-	09-MAR-2018	25-JUN-2018	US	Not Specified	US-BLUE EARTH DIAGNOSTICS LIMITED-BED-000007-2018	Calais J Fendler PW Herrmann K Eiber M Ceci F. Head-to-head comparison of 68GA-PSMA-11 and 18F-Fluciclovine PET/CT in a case series of 10 patients with prostate cancer recurrance. Journal of Nuclear Medicine. 2017	-
235	70	15060182	Axumin	Fluciclovine F-18	Positron Emission Tomogram	False Negative Investigation Result	Non-Serious	Non-Serious	Male	-	25-JUN-2018	Non-Expedited	74 YR	Not Specified	Blue Earth Diagnostics	Healthcare Professional	Not Specified	-	09-MAR-2018	25-JUN-2018	US	Not Specified	US-BLUE EARTH DIAGNOSTICS LIMITED-BED-000010-2018	Calais J Fendler PW Herrmann K Eiber M Ceci F. Head-to-head comparison of 68GA-PSMA-11 and 18F-Fluciclovine PET/CT in a case series of 10 patients with prostate cancer recurrance. Journal of Nuclear Medicine. 2017	-
236	71	15060137	Axumin	Fluciclovine F-18	Positron Emission Tomogram	Underdose	Non-Serious	Non-Serious	Not Specified	17-APR-2018	25-JUN-2018	Non-Expedited	Not Specified	Not Specified	Blue Earth Diagnostics	Healthcare Professional	Not Specified	-	19-APR-2018	25-JUN-2018	US	Not Specified	US-BLUE EARTH DIAGNOSTICS LIMITED-BED-000019-2018	-	-
237	72	15060135	Axumin	Fluciclovine F-18	Positron Emission Tomogram	Underdose	Non-Serious	Non-Serious	Male	-	25-JUN-2018	Non-Expedited	Not Specified	Not Specified	Blue Earth Diagnostics	Healthcare Professional	Not Specified	-	30-MAR-2018	25-JUN-2018	US	Not Specified	US-BLUE EARTH DIAGNOSTICS LIMITED-BED-000015-2018	-	-
238	73	15060119	Axumin	Fluciclovine F-18	Prostate Cancer	Product Use In Unapproved Indication	Non-Serious	Non-Serious	Not Specified	-	25-JUN-2018	Non-Expedited	Not Specified	Not Specified	Blue Earth Diagnostics	Healthcare Professional	Not Specified	-	07-MAR-2018	25-JUN-2018	NL	Not Specified	NL-BLUE EARTH DIAGNOSTICS LIMITED-BED-000003-2018	-	-
239	74	15060118	Axumin	Fluciclovine F-18	Product Used For Unknown Indication	Injection Site Pruritus;Injection Site Pain	Non-Serious	Non-Serious	Not Specified	-	25-JUN-2018	Non-Expedited	Not Specified	Not Specified	Blue Earth Diagnostics	Healthcare Professional	Not Specified	-	20-MAR-2018	25-JUN-2018	NL	Not Specified	NL-BLUE EARTH DIAGNOSTICS LIMITED-BED-000013-2018	-	-
240	75	15060117	Axumin	Fluciclovine F-18	Ill-Defined Disorder	Eye Swelling;Conjunctivitis;Eye Irritation;Eye Discharge;Ocular Hyperaemia	Non-Serious	Non-Serious	Male	-	25-JUN-2018	Non-Expedited	Not Specified	Not Specified	Blue Earth Diagnostics	Healthcare Professional	Not Specified	-	15-MAR-2018	25-JUN-2018	US	Not Specified	US-BLUE EARTH DIAGNOSTICS LIMITED-BED-000005-2018	-	-
241	76	13540402	Axumin	Fluciclovine F-18	Positron Emission Tomogram;Product Used For Unknown Indication	Vomiting;Diarrhoea	Serious	Other Outcomes	Male	16-MAR-2017	12-MAY-2017	Expedited	69 YR	180.3 KG	Blue Earth Diagnostics	Healthcare Professional	Not Specified	Nicotinic Acid;Coenzyme Q10;Vitamin E;Ascorbic Acid;Zocor	20-MAR-2017	12-MAY-2017	US	Not Specified	US-BLUE EARTH DIAGNOSTICS LIMITED-BED-000012-2017	-	-
242	1	24679017	-	Flortaucipir	Back Pain;Blood Cholesterol Increased;Cardiac Failure;Gastrooesophageal Reflux Disease;Hypertension;Iron Deficiency;Positron Emission Tomogram;Vitamin B1 Deficiency	Infection;Delirium	Serious	Hospitalized	Female	09-OCT-2024	19-DEC-2024	Expedited	68 YR	Not Specified	Eli Lilly And Co	Healthcare Professional	Not Specified	Tramadol;Acetaminophen;Thiamine;Omeprazole;Gabapentin;Ferrous Fumarate;Ramipril;Atorvastatin;Amlodipine	09-DEC-2024	29-NOV-2024	GB	Not Specified	GB-ELI_LILLY_AND_COMPANY-GB202411018183	-	-
243	2	20899168	Aduhelm	Aducanumab-Avwa;Flortaucipir;Florbetapir	Dementia Alzheimer's Type;Positron Emission Tomogram;Product Used For Unknown Indication;Prophylaxis	Amyloid Related Imaging Abnormality-Microhaemorrhages And Haemosiderin Deposits;Aphasia;Amyloid Related Imaging Abnormality-Oedema/Effusion;White Blood Cell Count Increased;Blood Urea Increased;Hyperglycaemia;Blood Calcium Increased;Mental Status Changes;Blood Chloride Decreased;Seizure	Serious	Hospitalized	Male	28-JAN-2022	16-SEP-2022	Expedited	76 YR	80.7 KG	Biogen	Healthcare Professional	Not Specified	Lisinopril;Potassium Chloride;Folic Acid;Clobetasol;Ezetimibe;Aspirin;Hydrochlorothiazide;Sodium Chloride;Dietary Supplement;Pravastatin;Famotidine	09-SEP-2022	01-JUN-2022	US	Not Specified	US-BIOGEN-2022BI01127148	-	-
244	3	20458381	Aduhelm	Aducanumab-Avwa;Flortaucipir;Florbetapir	Cognitive Disorder;Dementia Alzheimer's Type;Dry Eye;Hyperlipidaemia;Hypertension;Hypothyroidism;Neurodermatitis;Positron Emission Tomogram;Prophylaxis;Vitamin D Deficiency	Bradycardia;Vomiting;Headache;Nausea	Serious	Hospitalized	Female	-	11-FEB-2022	Expedited	77 YR	68 KG	Biogen	Healthcare Professional	Not Specified	Calcium;Restasis;Synthroid;Quetiapine;Lisinopril;Memantine;Venlafaxine;Crestor;Vitamin D;Amlodipine;Donepezil	03-FEB-2022	11-FEB-2022	US	Not Specified	US-BIOGEN-2022BI01095214	-	-
245	1	24530974	Amyvid	Florbetapir F-18	Product Used For Unknown Indication	Pain In Extremity;Injection Site Pain;Neck Pain	Non-Serious	Non-Serious	Female	-	29-OCT-2024	Non-Expedited	83 YR	Not Specified	Eli Lilly And Co	Healthcare Professional	Not Specified	-	24-OCT-2024	21-OCT-2024	US	Not Specified	US-ELI_LILLY_AND_COMPANY-US202410014002	-	-
246	2	24526958	Amyvid	Florbetapir F-18	Product Used For Unknown Indication	Confusional State;Aphasia;Disorientation	Non-Serious	Non-Serious	Not Specified	17-OCT-2024	21-OCT-2024	Non-Expedited	Not Specified	Not Specified	Eli Lilly And Co	Consumer	Not Specified	-	17-OCT-2024	21-OCT-2024	US	Not Specified	US-ELI_LILLY_AND_COMPANY-US202410013167	-	-
247	3	24243342	Amyvid	Florbetapir F-18	Product Used For Unknown Indication	Wrong Technique In Product Usage Process;Ear Disorder	Non-Serious	Non-Serious	Female	-	03-SEP-2024	Non-Expedited	Not Specified	Not Specified	Eli Lilly And Co	Consumer	Not Specified	-	28-AUG-2024	23-AUG-2024	US	Not Specified	US-ELI_LILLY_AND_COMPANY-US202408013244	-	-
248	4	24248171	Amyvid	Florbetapir F-18	Product Used For Unknown Indication	Drug Ineffective	Non-Serious	Non-Serious	Not Specified	15-AUG-2024	26-AUG-2024	Non-Expedited	Not Specified	Not Specified	Eli Lilly And Co	Consumer	Not Specified	-	16-AUG-2024	26-AUG-2024	US	Not Specified	US-ELI_LILLY_AND_COMPANY-US202408014929	-	-
249	5	23897906	Amyvid	Florbetapir F-18	Neuritic Plaques	Injection Site Pain;Rash Macular;Injection Site Discolouration	Non-Serious	Non-Serious	Not Specified	-	24-MAY-2024	Non-Expedited	Not Specified	Not Specified	Eli Lilly And Co	Consumer	Not Specified	-	24-APR-2024	24-MAY-2024	US	Not Specified	US-ELI_LILLY_AND_COMPANY-US202405013180	-	-
250	6	23897890	Amyvid	Florbetapir F-18	Neuritic Plaques	Injection Site Discolouration;Injection Site Pain;Rash Macular	Non-Serious	Non-Serious	Not Specified	-	24-MAY-2024	Non-Expedited	Not Specified	Not Specified	Eli Lilly And Co	Consumer	Not Specified	-	24-APR-2024	24-MAY-2024	US	Not Specified	US-ELI_LILLY_AND_COMPANY-US202405013183	-	-
251	7	18391918	Amyvid	Florbetapir F-18	Positron Emission Tomogram;Product Used For Unknown Indication	Hypersensitivity	Serious	Hospitalized	Female	25-SEP-2020	15-MAY-2024	Expedited	60 YR	76.5 KG	Eli Lilly And Co	Healthcare Professional	Not Specified	Metformin;Omeprazole	02-MAY-2024	16-OCT-2020	US	Not Specified	US-ELI_LILLY_AND_COMPANY-US202010001485	-	-
252	8	22902927	Amyvid	Florbetapir F-18	Benign Prostatic Hyperplasia;Cardiovascular Disorder;Dementia Alzheimer's Type;Hyperlipidaemia;Magnesium Deficiency;Neuropathy Peripheral;Osteoarthritis;Positron Emission Tomogram;Prophylaxis;Vitamin B Complex Deficiency;Vitamin D Deficiency	Drug Hypersensitivity	Serious	Other Outcomes	Male	29-AUG-2023	28-DEC-2023	Expedited	69 YR	101.3 KG	Eli Lilly And Co	Healthcare Professional	Not Specified	Tramadol;Duloxetine;Memantine;Arginine;Donepezil;Magnesium;Flomax;Vitamin D Nos;Aspirin;Gabapentin;Vitamin B2;Eliquis;Rosuvastatin;Tylenol	20-DEC-2023	04-SEP-2023	US	Not Specified	US-ELI_LILLY_AND_COMPANY-US202308018405	-	-
253	9	22719104	Amyvid	Florbetapir F-18;Aducanumab;Florquinitau	Benign Prostatic Hyperplasia;Cardiovascular Event Prophylaxis;Colonoscopy;Dementia Alzheimer's Type;Hypothyroidism;Positron Emission Tomogram;Routine Health Maintenance;Seasonal Allergy;Supine Hypertension	Amyloid Related Imaging Abnormality-Oedema/Effusion;Amyloid Related Imaging Abnormality-Microhaemorrhages And Haemosiderin Deposits	Non-Serious	Non-Serious	Male	06-JUL-2023	08-DEC-2023	Expedited	78 YR	87.9 KG	Biogen	Healthcare Professional	Not Specified	Amlodipine;Fish Oil;Coenzyme Q10;Donepezil;Aspirin;Vitamin D3;Levothyroxine;Flonase;Prasterone;Simethicone (Dimethicone);Finasteride;Neosynephrine	01-DEC-2023	18-JUL-2023	US	Not Specified	US-BIOGEN-2023BI01215365	-	-
254	10	23084933	Amyvid	Florbetapir F-18;Aducanumab	Dementia Alzheimer's Type;Positron Emission Tomogram	Amyloid Related Imaging Abnormality-Microhaemorrhages And Haemosiderin Deposits	Non-Serious	Non-Serious	Female	29-SEP-2023	06-DEC-2023	Expedited	78 YR	42 KG	Biogen	Healthcare Professional	Not Specified	Herbals	29-NOV-2023	19-OCT-2023	JP	Not Specified	JP-BIOGEN-2023BI01230918	-	-
255	11	22949892	Amyvid	Florbetapir F-18;Aducanumab	Amnesia;Dementia Alzheimer's Type;Hyperlipidaemia;Hypertension;Hypothyroidism;Ocular Discomfort;Osteoporosis;Positron Emission Tomogram;Supplementation Therapy	Amyloid Related Imaging Abnormality-Microhaemorrhages And Haemosiderin Deposits	Non-Serious	Non-Serious	Female	30-AUG-2023	28-NOV-2023	Expedited	83 YR	45.3 KG	Biogen	Healthcare Professional	Not Specified	Lisinopril;Lumigan;Brimonidine;Levothyroxine;Amlodipine;Vitamin E;Alendronate;Vitamin D3;Herbals\Turmeric;Rosuvastatin;Fish Oil;Rivastigmine	21-NOV-2023	15-SEP-2023	US	Not Specified	US-BIOGEN-2023BI01225069	-	-
256	12	23086257	Amyvid	Florbetapir F-18;Aducanumab;Florquinitau	Dementia Alzheimer's Type;Positron Emission Tomogram	Amyloid Related Imaging Abnormality-Oedema/Effusion	Non-Serious	Non-Serious	Female	04-OCT-2023	15-NOV-2023	Expedited	84 YR	67.4 KG	Biogen	Healthcare Professional	Not Specified	Cetirizine	07-NOV-2023	19-OCT-2023	US	Not Specified	US-BIOGEN-2023BI01230641	-	-
257	13	23010691	Amyvid	Florbetapir F-18;Florquinitau;Aducanumab	Dementia Alzheimer's Type;Positron Emission Tomogram	Amyloid Related Imaging Abnormality-Microhaemorrhages And Haemosiderin Deposits	Non-Serious	Non-Serious	Male	14-SEP-2023	30-OCT-2023	Expedited	76 YR	83.4 KG	Biogen	Healthcare Professional	Not Specified	Metformin Hydrochloride;Pravastatin Sodium	21-OCT-2023	29-SEP-2023	US	Not Specified	US-BIOGEN-2023BI01226926	-	-
258	14	22821608	Amyvid	Florbetapir F-18;Aducanumab;Florquinitau	Dementia Alzheimer's Type;Hyperlipidaemia;Migraine;Positron Emission Tomogram;Seasonal Allergy;Supplementation Therapy	Amyloid Related Imaging Abnormality-Oedema/Effusion;Somnolence;Migraine	Non-Serious	Non-Serious	Female	28-JUN-2023	27-OCT-2023	Expedited	81 YR	73.2 KG	Biogen	Healthcare Professional	Not Specified	Galantamine;Rosuvastatin;Vitamin B Complex;Sumatriptan;Coenzyme Q10;Zyrtec;Vitamin D;Vitamin C	19-OCT-2023	14-AUG-2023	US	Not Specified	US-BIOGEN-2023BI01219459	-	-
259	15	22372849	Amyvid	Florbetapir F-18;Aducanumab	Back Pain;Dementia Alzheimer's Type;Essential Tremor;Hyperlipidaemia;Hypertension;Hypothyroidism;Insomnia;Positron Emission Tomogram;Prophylaxis;Rhinitis;Supplementation Therapy	Amyloid Related Imaging Abnormality-Oedema/Effusion	Non-Serious	Non-Serious	Female	16-MAY-2023	29-SEP-2023	Expedited	80 YR	84.7 KG	Biogen	Healthcare Professional	Not Specified	Flonase;Levothyroxine;Lorazepam;Tylenol;Terazosin;Benadryl;Folic Acid;Enalapril;Rosuvastatin;Nebivolol;Coenzyme Q10;Vitamin D;Cyanocobalamin;Aspirin	21-SEP-2023	26-MAY-2023	US	Not Specified	US-BIOGEN-2023BI01206590	-	-
260	16	22111137	Amyvid	Florbetapir F-18;Florquinitau;Aducanumab	Cardiovascular Event Prophylaxis;Coronary Artery Disease;Dementia Alzheimer's Type;Hyperlipidaemia;Hypertension;Positron Emission Tomogram;Supplementation Therapy	Amyloid Related Imaging Abnormality-Oedema/Effusion;Superficial Siderosis Of Central Nervous System	Non-Serious	Non-Serious	Male	22-FEB-2023	29-SEP-2023	Expedited	79 YR	79.3 KG	Biogen	Healthcare Professional	Not Specified	Coenzyme Q10;Atorvastatin;Aspirin;Metoprolol;Omega-3 Acids;Minerals\Vitamins;Ezetimibe;Vitamin D3	28-SEP-2023	17-MAR-2023	US	Not Specified	US-BIOGEN-2023BI01192004	-	-
261	17	22999647	Amyvid	Florbetapir F-18	Product Used For Unknown Indication	Wrong Patient	Non-Serious	Non-Serious	Not Specified	-	28-SEP-2023	Non-Expedited	Not Specified	Not Specified	Eli Lilly And Co	Consumer	Not Specified	-	21-SEP-2023	28-SEP-2023	US	Not Specified	US-ELI_LILLY_AND_COMPANY-US202309013877	-	-
262	18	22791841	Amyvid	Florbetapir F-18;Florquinitau;Aducanumab	Dementia Alzheimer's Type;Positron Emission Tomogram	Amyloid Related Imaging Abnormality-Oedema/Effusion	Non-Serious	Non-Serious	Male	25-JUL-2023	25-SEP-2023	Expedited	80 YR	80.1 KG	Biogen	Healthcare Professional	Not Specified	Viagra	16-SEP-2023	07-AUG-2023	US	Not Specified	US-BIOGEN-2023BI01218469	-	-
263	19	22156845	Amyvid	Florbetapir F-18;Aducanumab	Dementia Alzheimer's Type;Positron Emission Tomogram	Amyloid Related Imaging Abnormality-Oedema/Effusion;Headache;Superficial Siderosis Of Central Nervous System	Non-Serious	Non-Serious	Female	03-MAR-2023	05-SEP-2023	Expedited	76 YR	57.4 KG	Biogen	Healthcare Professional	Not Specified	Prolia;Simvastatin;Advair Hfa;Excedrin;Vitamin D3	31-AUG-2023	30-MAR-2023	US	Not Specified	US-BIOGEN-2023BI01194655	-	-
264	20	22674147	Amyvid	Florbetapir F-18;Florquinitau;Aducanumab	Dementia Alzheimer's Type;Positron Emission Tomogram	Amyloid Related Imaging Abnormality-Microhaemorrhages And Haemosiderin Deposits	Non-Serious	Non-Serious	Male	20-JUN-2023	31-AUG-2023	Expedited	79 YR	58.4 KG	Biogen	Healthcare Professional	Not Specified	Folic Acid;Olopatadine Hydrochloride;Herbals;Epinastine Hydrochloride;Rivastigmine	25-AUG-2023	05-JUL-2023	JP	Not Specified	JP-BIOGEN-2023BI01212669	-	-
265	21	22738672	Amyvid	Florbetapir F-18;Aducanumab	Dementia Alzheimer's Type;Positron Emission Tomogram	Amyloid Related Imaging Abnormality-Oedema/Effusion;Superficial Siderosis Of Central Nervous System;Amyloid Related Imaging Abnormality-Microhaemorrhages And Haemosiderin Deposits	Non-Serious	Non-Serious	Male	12-JUL-2023	14-AUG-2023	Expedited	68 YR	78.5 KG	Biogen	Healthcare Professional	Not Specified	-	10-AUG-2023	21-JUL-2023	JP	Not Specified	JP-BIOGEN-2023BI01216061	-	-
266	22	22157163	Amyvid	Florbetapir F-18;Aducanumab	Dementia Alzheimer's Type;Positron Emission Tomogram	Amyloid Related Imaging Abnormality-Microhaemorrhages And Haemosiderin Deposits	Non-Serious	Non-Serious	Male	08-FEB-2023	03-AUG-2023	Expedited	82 YR	79.7 KG	Biogen	Healthcare Professional	Not Specified	Lisinopril;Amlodipine;Memantine	27-JUL-2023	30-MAR-2023	US	Not Specified	US-BIOGEN-2023BI01195241	-	-
267	23	22085480	Amyvid	Florbetapir F-18;Florquinitau;Aducanumab	Dementia Alzheimer's Type;Positron Emission Tomogram	Amyloid Related Imaging Abnormality-Oedema/Effusion;Amyloid Related Imaging Abnormality-Microhaemorrhages And Haemosiderin Deposits	Non-Serious	Non-Serious	Male	16-FEB-2023	20-JUL-2023	Expedited	81 YR	58.6 KG	Biogen	Healthcare Professional	Not Specified	Atorvastatin;Donepezil;Memantine;Losartan	13-JUL-2023	10-MAR-2023	US	Not Specified	US-BIOGEN-2023BI01190838	-	-
268	24	22345577	Amyvid	Aducanumab;Florbetapir F-18;Florquinitau	Dementia Alzheimer's Type;Depression;Gastrointestinal Disorder Prophylaxis;Positron Emission Tomogram;Routine Health Maintenance;Seasonal Allergy	Amyloid Related Imaging Abnormality-Microhaemorrhages And Haemosiderin Deposits	Non-Serious	Non-Serious	Female	08-MAY-2023	05-JUL-2023	Expedited	77 YR	54.1 KG	Biogen	Healthcare Professional	Not Specified	Probiotics Nos;Magnesium;Allegra;Fish Oil;Bupropion	28-JUN-2023	19-MAY-2023	US	Not Specified	US-BIOGEN-2023BI01205229	-	-
269	25	22173825	Amyvid	Florbetapir F-18;Florquinitau;Aducanumab	Dementia Alzheimer's Type;Positron Emission Tomogram	Amyloid Related Imaging Abnormality-Oedema/Effusion	Non-Serious	Non-Serious	Male	24-MAR-2023	02-JUN-2023	Expedited	81 YR	79.8 KG	Biogen	Healthcare Professional	Not Specified	Metformin;Aspirin;Atorvastatin	26-MAY-2023	04-APR-2023	US	Not Specified	US-BIOGEN-2023BI01196286	-	-
270	26	21452041	Amyvid	Aducanumab;Florbetapir F-18	Dementia Alzheimer's Type;Dermatophytosis Of Nail;Meniere's Disease;Positron Emission Tomogram	Encephalopathy;Amyloid Related Imaging Abnormality-Oedema/Effusion	Serious	Hospitalized	Female	03-OCT-2022	24-APR-2023	Expedited	85 YR	43 KG	Biogen	Healthcare Professional	Not Specified	Fosravuconazole L-Lysine Ethanolate;Diphenidol Hydrochloride;Herbals	19-APR-2023	13-OCT-2022	JP	Not Specified	JP-BIOGEN-2022BI01159461	-	-
271	27	21371554	Amyvid	Florbetapir F-18;Aducanumab	Dementia Alzheimer's Type;Depression;Hyperlipidaemia;Positron Emission Tomogram;Prophylaxis;Supplementation Therapy	Seizure	Serious	Hospitalized	Male	04-SEP-2022	27-JAN-2023	Expedited	75 YR	86.5 KG	Biogen	Healthcare Professional	Not Specified	Aspirin;Atorvastatin;Escitalopram Oxalate;Donepezil;Memantine;Vitamin B Complex	18-JAN-2023	23-SEP-2022	US	Not Specified	US-BIOGEN-2022BI01154791	-	-
272	28	21807105	Emgality;Amyvid	Florbetapir F-18;Galcanezumab-Gnlm	Product Used For Unknown Indication	Diplopia;Nausea;General Physical Health Deterioration;Headache	Non-Serious	Non-Serious	Female	-	02-JAN-2023	Non-Expedited	Not Specified	Not Specified	Eli Lilly And Co	Consumer	Not Specified	-	06-DEC-2022	02-JAN-2023	US	Not Specified	US-ELI_LILLY_AND_COMPANY-US202212004562	-	-
273	29	20899168	Aduhelm	Aducanumab-Avwa;Flortaucipir;Florbetapir	Dementia Alzheimer's Type;Positron Emission Tomogram;Product Used For Unknown Indication;Prophylaxis	Amyloid Related Imaging Abnormality-Microhaemorrhages And Haemosiderin Deposits;Aphasia;Amyloid Related Imaging Abnormality-Oedema/Effusion;White Blood Cell Count Increased;Blood Urea Increased;Hyperglycaemia;Blood Calcium Increased;Mental Status Changes;Blood Chloride Decreased;Seizure	Serious	Hospitalized	Male	28-JAN-2022	16-SEP-2022	Expedited	76 YR	80.7 KG	Biogen	Healthcare Professional	Not Specified	Lisinopril;Potassium Chloride;Folic Acid;Clobetasol;Ezetimibe;Aspirin;Hydrochlorothiazide;Sodium Chloride;Dietary Supplement;Pravastatin;Famotidine	09-SEP-2022	01-JUN-2022	US	Not Specified	US-BIOGEN-2022BI01127148	-	-
274	30	21192269	Amyvid	Florbetapir F-18	Product Used For Unknown Indication	Incorrect Dose Administered By Product	Non-Serious	Non-Serious	Not Specified	-	09-AUG-2022	Non-Expedited	Not Specified	Not Specified	Eli Lilly And Co	Healthcare Professional	Not Specified	-	19-JUL-2022	09-AUG-2022	US	Not Specified	US-ELI_LILLY_AND_COMPANY-US202207008472	-	-
275	31	20834438	-	Florbetapir	Bipolar Ii Disorder;Dementia Alzheimer's Type	Borderline Personality Disorder	Serious	Hospitalized	Female	16-APR-2022	17-JUN-2022	Expedited	Not Specified	51.8 KG	Eli Lilly And Co	Consumer	Not Specified	Lithium	06-JUN-2022	16-MAY-2022	US	Not Specified	US-ELI_LILLY_AND_COMPANY-US202205002057	-	-
276	32	20458381	Aduhelm	Aducanumab-Avwa;Flortaucipir;Florbetapir	Cognitive Disorder;Dementia Alzheimer's Type;Dry Eye;Hyperlipidaemia;Hypertension;Hypothyroidism;Neurodermatitis;Positron Emission Tomogram;Prophylaxis;Vitamin D Deficiency	Bradycardia;Vomiting;Headache;Nausea	Serious	Hospitalized	Female	-	11-FEB-2022	Expedited	77 YR	68 KG	Biogen	Healthcare Professional	Not Specified	Calcium;Restasis;Synthroid;Quetiapine;Lisinopril;Memantine;Venlafaxine;Crestor;Vitamin D;Amlodipine;Donepezil	03-FEB-2022	11-FEB-2022	US	Not Specified	US-BIOGEN-2022BI01095214	-	-
277	33	18899932	Amyvid	Florbetapir F-18	Scan	Rash	Non-Serious	Non-Serious	Not Specified	DEC-2020	04-MAR-2021	Non-Expedited	Not Specified	Not Specified	Eli Lilly And Co	Consumer	Not Specified	-	26-FEB-2021	16-FEB-2021	US	Not Specified	US-ELI_LILLY_AND_COMPANY-US202102007346	-	-
278	34	18906122	Amyvid	Florbetapir F-18	Product Used For Unknown Indication	Blood Glucose Increased	Non-Serious	Non-Serious	Female	-	17-FEB-2021	Non-Expedited	Not Specified	Not Specified	Eli Lilly And Co	Healthcare Professional	Not Specified	Metformin	28-JAN-2021	17-FEB-2021	US	Not Specified	US-ELI_LILLY_AND_COMPANY-US202102001053	-	-
279	35	17656344	Amyvid;Axumin	Fluciclovine F-18;Florbetapir F-18	Product Used For Unknown Indication	Wrong Product Administered	Non-Serious	Non-Serious	Not Specified	-	10-APR-2020	Non-Expedited	Not Specified	Not Specified	Eli Lilly And Co	Healthcare Professional	Not Specified	-	08-APR-2020	10-APR-2020	US	Not Specified	US-ELI_LILLY_AND_COMPANY-US202004004125	-	-
280	36	16292679	Amyvid	Florbetapir F-18	Product Used For Unknown Indication	Vomiting	Non-Serious	Non-Serious	Female	-	09-MAY-2019	Expedited	Not Specified	Not Specified	Eli Lilly And Co	Healthcare Professional	Not Specified	-	23-APR-2019	09-MAY-2019	US	Not Specified	US-ELI_LILLY_AND_COMPANY-US201904013145	-	-
281	37	12126614	Amyvid	Florbetapir F-18;Aducanumab	Amnesia;Cardiovascular Event Prophylaxis;Claustrophobia;Dementia Alzheimer's Type;Headache;Hypercholesterolaemia;Hypothyroidism;Memory Impairment;Positron Emission Tomogram	Hypertension	Serious	Other Outcomes	Female	09-FEB-2016	17-DEC-2018	Expedited	74 YR	75.3 KG	Biogen	Healthcare Professional	Not Specified	Tylenol Extra Strength;Namenda;Xanax;Donepezil;Aspirin;Levothyroxine;Simvastatin	08-DEC-2018	29-FEB-2016	US	Not Specified	US-BIOGEN-2016BI00191079	-	-
282	38	14983521	Amyvid	Florbetapir F-18	Product Used For Unknown Indication	Burning Sensation	Non-Serious	Non-Serious	Not Specified	-	07-JUN-2018	Non-Expedited	Not Specified	Not Specified	Eli Lilly And Co	Healthcare Professional	Not Specified	-	05-JUN-2018	07-JUN-2018	US	Not Specified	US-ELI_LILLY_AND_COMPANY-US201806002333	-	-
283	39	14211303	Amyvid	Florbetapir F-18	Product Used For Unknown Indication	Wrong Patient Received Product	Non-Serious	Non-Serious	Not Specified	03-NOV-2017	21-NOV-2017	Non-Expedited	Not Specified	Not Specified	Eli Lilly And Co	Healthcare Professional	Not Specified	-	06-NOV-2017	21-NOV-2017	US	Not Specified	US-ELI_LILLY_AND_COMPANY-US201711002501	-	-
284	40	14143308	Amyvid	Florbetapir F-18	Product Used For Unknown Indication	Chest Pain	Non-Serious	Non-Serious	Male	-	30-OCT-2017	Non-Expedited	Not Specified	Not Specified	Eli Lilly And Co	Healthcare Professional	Not Specified	-	12-OCT-2017	30-OCT-2017	US	Not Specified	US-ELI_LILLY_AND_COMPANY-US201710004874	-	-
285	41	14143280	Amyvid	Florbetapir F-18	Product Used For Unknown Indication	Chest Pain	Non-Serious	Non-Serious	Female	-	30-OCT-2017	Non-Expedited	Not Specified	Not Specified	Eli Lilly And Co	Healthcare Professional	Not Specified	-	12-OCT-2017	30-OCT-2017	US	Not Specified	US-ELI_LILLY_AND_COMPANY-US201710004898	-	-
286	42	13857294	-	Florbetapir	Diagnostic Procedure	Pain In Extremity	Non-Serious	Non-Serious	Female	03-AUG-2017	29-AUG-2017	Non-Expedited	70 YR	66.4 KG	Eli Lilly And Co	Healthcare Professional	Not Specified	-	22-AUG-2017	10-AUG-2017	US	Not Specified	US-ELI_LILLY_AND_COMPANY-US201708003201	-	-
287	43	13503408	Amyvid	Florbetapir F-18	Product Used For Unknown Indication	Positron Emission Tomogram Abnormal	Non-Serious	Non-Serious	Not Specified	-	02-MAY-2017	Non-Expedited	Not Specified	Not Specified	Eli Lilly And Co	Consumer	Not Specified	-	01-MAY-2017	02-MAY-2017	US	Not Specified	US-ELI_LILLY_AND_COMPANY-US201705000144	-	-
288	44	13061929	Amyvid	Florbetapir F-18	Product Used For Unknown Indication	Pain In Extremity;Limb Discomfort	Non-Serious	Non-Serious	Female	-	26-DEC-2016	Non-Expedited	Not Specified	Not Specified	Eli Lilly And Co	Consumer	Not Specified	-	08-DEC-2016	26-DEC-2016	US	Not Specified	US-ELI_LILLY_AND_COMPANY-US201612004212	-	-
289	45	12707793	Amyvid	Florbetapir F-18	Product Used For Unknown Indication	Injection Site Pain;Injection Site Erythema	Non-Serious	Non-Serious	Not Specified	25-AUG-2016	09-SEP-2016	Non-Expedited	Not Specified	Not Specified	Eli Lilly And Co	Consumer	Not Specified	Sodium Chloride	25-AUG-2016	01-SEP-2016	US	Not Specified	US-ELI_LILLY_AND_COMPANY-US201608013096	-	-
290	46	12248324	Amyvid	Florbetapir F-18;Aducanumab	Blood Testosterone Decreased;Cardiovascular Event Prophylaxis;Dementia Alzheimer's Type;Glaucoma;Hyperlipidaemia;Insomnia;Nasopharyngitis;Oesophagitis;Positron Emission Tomogram;Supplementation Therapy	Incarcerated Hernia	Serious	Hospitalized	Male	23-MAR-2016	19-APR-2016	Expedited	66 YR	71.4 KG	Biogen	Healthcare Professional	Not Specified	Vitamin C;Vitamin B Complex;Testosterone;Zyrtec;Vitamin D Nos;Amoxicillin;Niaspan;Dextromethorphan Hydrobromide\Guaifenesin;Dexilant;Dorzolamide\Timolol;Valerian Extract;Lovaza;Lumigan;Crestor;Aspirin	15-APR-2016	08-APR-2016	US	Not Specified	US-BIOGEN-2016BI00213419	-	-
291	47	12277403	Amyvid	Florbetapir F-18;Aducanumab	Cardiovascular Event Prophylaxis;Dementia Alzheimer's Type;Hypothyroidism;Nutritional Supplementation;Positron Emission Tomogram	Acquired Oesophageal Web	Serious	Hospitalized	Male	02-APR-2016	18-APR-2016	Expedited	78 YR	69.01 KG	Biogen	Healthcare Professional	Not Specified	Galantamine;Aspirin;Omega-3 Fatty Acids;Levothyroxine;Vitamin C;Calcium;Herbals\Saw Palmetto;Vitamin E;Fish Oil;Metamucil	05-APR-2016	18-APR-2016	US	Not Specified	US-BIOGEN-2016BI00215579	-	-
292	48	11921957	Amyvid	Florbetapir F-18;Aducanumab	Anxiety;Automatic Bladder;Cognitive Disorder;Dementia Alzheimer's Type;Depression;Hyperlipidaemia;Hypertension;Hypothyroidism;Insomnia;Scan With Contrast	Dehydration;Urinary Tract Infection;Acute Kidney Injury	Serious	Hospitalized	Female	03-JAN-2016	18-APR-2016	Expedited	77 YR	68 KG	Biogen	Healthcare Professional	Not Specified	Levothyroxine;Lorazepam;Tizanidine;Vitamin B12;Cod Liver Oil;Vitamin D3;Atorvastatin;Donepezil;Lisinopril;Coenzyme Q10;Fluticasone;Acetaminophen\Hydrocodone Bitartrate;Trazodone;Fluoxetine;Keppra	07-APR-2016	15-JAN-2016	US	Not Specified	US-BIOGEN-2016BI00168156	-	-
293	49	11433714	Amyvid;Zyprexa	Olanzapine;Florbetapir F-18	Product Used For Unknown Indication	Weight Increased;Skin Disorder;Musculoskeletal Disorder;Dysarthria;Menopausal Disorder;Cerebral Disorder;Violence-Related Symptom	Serious	Other Outcomes	Female	-	31-AUG-2015	Expedited	Not Specified	Not Specified	Eli Lilly And Co	Consumer	Not Specified	-	18-AUG-2015	31-AUG-2015	US	Not Specified	US-ELI_LILLY_AND_COMPANY-US201508005598	-	-
294	50	11252352	Amyvid	Florbetapir F-18	Positron Emission Tomogram	Blood Pressure Increased;Headache	Serious	Other Outcomes	Female	11-FEB-2014	08-JUL-2015	Non-Expedited	Not Specified	Not Specified	Eli Lilly And Co	Healthcare Professional	Not Specified	-	11-FEB-2014	08-JUL-2015	US	Not Specified	US-ELI_LILLY_AND_COMPANY-US201402005662	-	-
295	51	11252253	Amyvid	Florbetapir F-18	-	Pain In Extremity	Non-Serious	Non-Serious	Female	JAN-2013	08-JUL-2015	Non-Expedited	Not Specified	Not Specified	Eli Lilly And Co	Healthcare Professional	Not Specified	-	16-JUL-2013	08-JUL-2015	US	Not Specified	US-ELI_LILLY_AND_COMPANY-US201307006017	-	-
296	52	11252223	Amyvid	Florbetapir F-18	-	Wrong Product Administered	Non-Serious	Non-Serious	Female	-	08-JUL-2015	Non-Expedited	63 YR	Not Specified	Eli Lilly And Co	Healthcare Professional	Not Specified	-	03-JUN-2013	08-JUL-2015	US	Not Specified	US-ELI_LILLY_AND_COMPANY-US201306001175	-	-
297	53	11252182	Amyvid	Florbetapir F-18	Dementia	Balance Disorder;Sedation	Non-Serious	Non-Serious	Female	-	08-JUL-2015	Non-Expedited	Not Specified	Not Specified	Eli Lilly And Co	Healthcare Professional	Not Specified	Aspirin;Celexa;Levothyroxine Sodium;Klonopin	18-JUL-2013	08-JUL-2015	US	Not Specified	US-ELI_LILLY_AND_COMPANY-US201307008868	-	-
298	54	11252088	Amyvid	Florbetapir F-18	Dementia Alzheimer's Type	Headache;Injection Site Discomfort	Non-Serious	Non-Serious	Female	-	08-JUL-2015	Non-Expedited	Not Specified	Not Specified	Eli Lilly And Co	Consumer	Not Specified	-	06-MAR-2013	08-JUL-2015	US	Not Specified	US-ELI_LILLY_AND_COMPANY-US201303002189	-	-
299	55	11251981	Amyvid	Florbetapir F-18	Memory Impairment	Infusion Site Pain	Non-Serious	Non-Serious	Female	15-NOV-2012	08-JUL-2015	Non-Expedited	79 YR	86.17 KG	Eli Lilly And Co	Consumer	Not Specified	-	15-NOV-2012	08-JUL-2015	US	Not Specified	US-ELI_LILLY_AND_COMPANY-US201211006671	-	-
300	56	11251946	Amyvid	Florbetapir F-18	-	Sensory Disturbance	Non-Serious	Non-Serious	Male	24-OCT-2012	08-JUL-2015	Non-Expedited	74 YR	Not Specified	Eli Lilly And Co	Healthcare Professional	Not Specified	-	24-OCT-2012	08-JUL-2015	US	Not Specified	US-ELI_LILLY_AND_COMPANY-US201210009063	-	-
301	57	11251863	Amyvid	Florbetapir F-18	-	Underdose	Non-Serious	Non-Serious	Female	12-JUL-2012	08-JUL-2015	Non-Expedited	71 YR	Not Specified	Eli Lilly And Co	Consumer	Not Specified	-	12-JUL-2012	08-JUL-2015	US	Not Specified	US-ELI_LILLY_AND_COMPANY-US201207004054	-	-
302	58	11251848	Amyvid	Florbetapir F-18	-	Injection Site Pain	Non-Serious	Non-Serious	Female	28-JUN-2012	08-JUL-2015	Non-Expedited	Not Specified	Not Specified	Eli Lilly And Co	Consumer	Not Specified	-	28-JUN-2012	08-JUL-2015	US	Not Specified	US-ELI_LILLY_AND_COMPANY-US201207002347	-	-
303	59	11251803	Amyvid	Florbetapir F-18	Radioisotope Scan	Injection Site Pain	Non-Serious	Non-Serious	Female	-	08-JUL-2015	Non-Expedited	Not Specified	Not Specified	Eli Lilly And Co	Consumer	Not Specified	-	16-AUG-2012	08-JUL-2015	US	Not Specified	US-ELI_LILLY_AND_COMPANY-US201208006101	-	-
304	60	11251794	Amyvid	Florbetapir F-18	-	Underdose	Non-Serious	Non-Serious	Female	-	08-JUL-2015	Non-Expedited	75 YR	Not Specified	Eli Lilly And Co	Consumer	Not Specified	-	13-AUG-2012	08-JUL-2015	US	Not Specified	US-ELI_LILLY_AND_COMPANY-US201208004658	-	-
305	61	11251700	Amyvid	Florbetapir F-18	Scan Brain	Arthralgia;Injection Site Mass	Non-Serious	Non-Serious	Male	01-JUN-2012	08-JUL-2015	Non-Expedited	Not Specified	Not Specified	Eli Lilly And Co	Consumer	Not Specified	-	01-JUN-2012	08-JUL-2015	US	Not Specified	US-ELI_LILLY_AND_COMPANY-US201206001804	-	-
306	62	11215546	Amyvid	Florbetapir F-18	Positron Emission Tomogram	Headache;Fatigue	Non-Serious	Non-Serious	Female	-	24-JUN-2015	Non-Expedited	Not Specified	Not Specified	Eli Lilly And Co	Consumer	Not Specified	-	19-OCT-2012	24-JUN-2015	US	Not Specified	US-ELI_LILLY_AND_COMPANY-US201210007303	-	-
307	63	10777278	Amyvid	Florbetapir F-18	Diagnostic Procedure	Drug Ineffective	Non-Serious	Non-Serious	Female	20-JAN-2015	09-FEB-2015	Non-Expedited	69 YR	Not Specified	Eli Lilly And Co	Healthcare Professional	Not Specified	-	20-JAN-2015	09-FEB-2015	US	Not Specified	US-ELI_LILLY_AND_COMPANY-US201501010175	-	-
308	64	10483876	Amyvid	Florbetapir F-18	Positron Emission Tomogram	Hypotension	Serious	Other Outcomes	Female	16-SEP-2014	01-DEC-2014	Expedited	55 YR	Not Specified	Eli Lilly And Co	Healthcare Professional	Not Specified	Escitalopram	17-NOV-2014	30-SEP-2014	ES	Not Specified	ES-ELI_LILLY_AND_COMPANY-ES201409006642	-	-
309	65	10496941	-	Florbetapir	Product Used For Unknown Indication	Product Distribution Issue	Non-Serious	Non-Serious	Not Specified	02-SEP-2014	06-OCT-2014	Non-Expedited	Not Specified	Not Specified	Eli Lilly And Co	Healthcare Professional	Not Specified	-	04-SEP-2014	06-OCT-2014	US	Not Specified	US-ELI_LILLY_AND_COMPANY-US201409001973	-	-
310	66	10495460	Amyvid	Florbetapir F-18	Product Used For Unknown Indication	Muscle Spasms	Non-Serious	Non-Serious	Female	03-SEP-2014	03-OCT-2014	Non-Expedited	Not Specified	Not Specified	Eli Lilly And Co	Healthcare Professional	Not Specified	-	03-SEP-2014	03-OCT-2014	US	Not Specified	US-ELI_LILLY_AND_COMPANY-US201409002093	-	-
311	67	9462277	Amyvid	Florbetapir F-18	-	Suspected Transmission Of An Infectious Agent Via Product	Serious	Other Outcomes	Not Specified	24-JUL-2013	18-NOV-2013	Expedited	Not Specified	Not Specified	Eli Lilly And Co	Consumer	Not Specified	-	12-NOV-2013	16-AUG-2013	US	Not Specified	US-ELI_LILLY_AND_COMPANY-US201308003117	-	-
312	1	24224351	Pylarify	Piflufolastat F-18	Positron Emission Tomogram	Dyspnoea;Injection Related Reaction	Serious	Other Outcomes	Male	09-AUG-2024	25-OCT-2024	Expedited	75 YR	118 KG	Progenics Pharmaceuticals	Consumer	Not Specified	-	15-OCT-2024	19-AUG-2024	US	Not Specified	US-PROGENICS PHARMACEUTICALS, INC.-LMI-2024-01013	-	-
313	2	24189475	Pylarify	Piflufolastat F-18	Product Used For Unknown Indication;Prostate Cancer Recurrent	Arthropathy	Serious	Other Outcomes	Male	-	08-AUG-2024	Expedited	Not Specified	Not Specified	Progenics Pharmaceuticals	Consumer	Not Specified	-	30-JUL-2024	08-AUG-2024	US	Not Specified	US-PROGENICS PHARMACEUTICALS, INC.-LMI-2024-00977	-	-
314	3	23995544	Pylarify	Piflufolastat F-18	Haematuria;Positron Emission Tomogram;Product Used For Unknown Indication	Urinary Tract Infection	Serious	Hospitalized	Male	01-FEB-2024	25-JUN-2024	Expedited	67 YR	93 KG	Progenics Pharmaceuticals	Healthcare Professional	Not Specified	Amoxicillin;Lisinopril;Amlodipine;Metoprolol Succinate;Clavulanate Potassium	14-JUN-2024	20-JUN-2024	US	Not Specified	US-PROGENICS PHARMACEUTICALS, INC.-LMI-2024-00745	-	-
315	4	23977369	Pylarify	Piflufolastat F-18	Product Used For Unknown Indication	Blood Urine Present	Non-Serious	Non-Serious	Male	17-MAR-2024	14-JUN-2024	Non-Expedited	57 YR	Not Specified	Progenics Pharmaceuticals	Consumer	Not Specified	Lisinopril	20-MAR-2024	14-JUN-2024	US	Not Specified	US-LANTHEUS MEDICAL IMAGING-LMI-2024-00339	-	-
316	5	23977365	Pylarify	Piflufolastat F-18	Positron Emission Tomogram	Exposure To Radiation	Non-Serious	Non-Serious	Male	07-DEC-2022	14-JUN-2024	Non-Expedited	79 YR	Not Specified	Progenics Pharmaceuticals	Consumer	Not Specified	-	06-MAY-2024	14-JUN-2024	US	Not Specified	US-LANTHEUS MEDICAL IMAGING-LMI-2024-00581	-	-
317	6	23977364	Pylarify	Piflufolastat F-18	Product Used For Unknown Indication	Product Dispensing Error	Non-Serious	Non-Serious	Male	08-APR-2024	14-JUN-2024	Non-Expedited	Not Specified	Not Specified	Progenics Pharmaceuticals	Consumer	Not Specified	-	08-APR-2024	14-JUN-2024	US	Not Specified	US-LANTHEUS MEDICAL IMAGING-LMI-2024-00427	-	-
318	7	23977363	Pylarify	Piflufolastat F-18	Prostate Cancer	Urticaria;Hypoaesthesia Oral;Paraesthesia Oral;Wheezing;Pruritus	Non-Serious	Non-Serious	Male	15-APR-2024	14-JUN-2024	Non-Expedited	55 YR	143 KG	Progenics Pharmaceuticals	Consumer	Not Specified	-	17-APR-2024	14-JUN-2024	US	Not Specified	US-LANTHEUS MEDICAL IMAGING-LMI-2024-00487	-	-
319	8	23977362	Pylarify	Piflufolastat F-18	Product Used For Unknown Indication	Intercepted Product Dispensing Error	Non-Serious	Non-Serious	Male	07-MAY-2024	14-JUN-2024	Non-Expedited	Not Specified	Not Specified	Progenics Pharmaceuticals	Consumer	Not Specified	-	08-MAY-2024	14-JUN-2024	US	Not Specified	US-LANTHEUS MEDICAL IMAGING-LMI-2024-00593	-	-
320	9	23977361	Pylarify	Piflufolastat F-18	Positron Emission Tomogram Prostate;Product Used For Unknown Indication	Radioisotope Scan Abnormal	Non-Serious	Non-Serious	Male	22-JAN-2024	14-JUN-2024	Non-Expedited	78 YR	83 KG	Progenics Pharmaceuticals	Consumer	Not Specified	Magnesium;Amlodipine;Potassium Citrate;Alfuzosin	23-MAY-2024	14-JUN-2024	US	Not Specified	US-LANTHEUS MEDICAL IMAGING-LMI-2024-00508	-	-
321	10	23977360	Pylarify	Piflufolastat F-18	Scan	Product Dispensing Error	Non-Serious	Non-Serious	Male	08-APR-2024	14-JUN-2024	Non-Expedited	Not Specified	Not Specified	Progenics Pharmaceuticals	Consumer	Not Specified	-	08-APR-2024	14-JUN-2024	US	Not Specified	US-LANTHEUS MEDICAL IMAGING-LMI-2024-00429	-	-
322	11	23977359	Pylarify	Piflufolastat F-18	Positron Emission Tomogram	Radioisotope Scan Abnormal;Drug Ineffective	Non-Serious	Non-Serious	Male	26-MAR-2024	14-JUN-2024	Non-Expedited	83 YR	81 KG	Progenics Pharmaceuticals	Consumer	Not Specified	-	28-MAR-2024	14-JUN-2024	US	Not Specified	US-LANTHEUS MEDICAL IMAGING-LMI-2024-00382	-	-
323	12	23638034	Pylarify	Piflufolastat F-18	Positron Emission Tomogram;Product Used For Unknown Indication	Drug Ineffective;Radioisotope Scan Abnormal	Non-Serious	Non-Serious	Male	21-DEC-2023	15-MAR-2024	Non-Expedited	62 YR	99 KG	Progenics Pharmaceuticals	Consumer	Not Specified	Ibuprofen;Paxlovid;Finasteride;Tadalafil;Sildenafil Citrate	03-JAN-2024	15-MAR-2024	US	Not Specified	US-LANTHEUS MEDICAL IMAGING-LMI-2023-01522	-	-
324	13	23638033	Pylarify	Piflufolastat F-18	Positron Emission Tomogram;Product Used For Unknown Indication	Anxiety;Pain In Extremity	Non-Serious	Non-Serious	Male	09-JAN-2024	15-MAR-2024	Non-Expedited	65 YR	91 KG	Progenics Pharmaceuticals	Consumer	Not Specified	Coumadin;Ciprofloxacin;Omeprazole;Flomax;Tadalafil	10-JAN-2024	15-MAR-2024	US	Not Specified	US-LANTHEUS MEDICAL IMAGING-LMI-2024-00029	-	-
325	14	23638032	Pylarify	Piflufolastat F-18	Positron Emission Tomogram Prostate;Product Used For Unknown Indication	Drug Ineffective;Radioisotope Scan Abnormal	Non-Serious	Non-Serious	Male	13-DEC-2023	15-MAR-2024	Non-Expedited	73 YR	107 KG	Progenics Pharmaceuticals	Consumer	Not Specified	Furosemide;Metformin;Aspirin;Losartan;Ezetimibe;Carvedilol;Rosuvastatin;Acetaminophen	08-JAN-2024	15-MAR-2024	US	Not Specified	US-LANTHEUS MEDICAL IMAGING-LMI-2023-01498	-	-
326	15	23638028	Pylarify	Piflufolastat F-18	Positron Emission Tomogram;Product Used For Unknown Indication	Radioisotope Scan Abnormal;Drug Ineffective	Non-Serious	Non-Serious	Male	31-JAN-2024	15-MAR-2024	Non-Expedited	68 YR	Not Specified	Progenics Pharmaceuticals	Consumer	Not Specified	Cyclobenzaprine;Fludrocortisone;Cialis;Tamsulosin;Cipro;Tadalafil	01-FEB-2024	15-MAR-2024	US	Not Specified	US-LANTHEUS MEDICAL IMAGING-LMI-2024-00137	-	-
327	16	23638027	Pylarify	Piflufolastat F-18	Product Used For Unknown Indication	Radioisotope Scan Abnormal	Non-Serious	Non-Serious	Male	-	15-MAR-2024	Non-Expedited	Not Specified	Not Specified	Progenics Pharmaceuticals	Consumer	Not Specified	-	22-FEB-2024	15-MAR-2024	US	Not Specified	US-LANTHEUS MEDICAL IMAGING-LMI-2024-00203	-	-
328	17	23638026	Pylarify	Piflufolastat F-18	Product Used For Unknown Indication	Product Dispensing Error;Off Label Use;Wrong Product Administered	Non-Serious	Non-Serious	Female	17-JAN-2024	15-MAR-2024	Non-Expedited	Not Specified	Not Specified	Progenics Pharmaceuticals	Healthcare Professional	Not Specified	-	17-JAN-2024	15-MAR-2024	US	Not Specified	US-LANTHEUS MEDICAL IMAGING-LMI-2024-00072	-	-
329	18	23638025	Pylarify	Piflufolastat F-18	Positron Emission Tomogram	Erectile Dysfunction;Incontinence;Fatigue;Muscle Atrophy	Non-Serious	Non-Serious	Male	-	15-MAR-2024	Non-Expedited	56 YR	Not Specified	Progenics Pharmaceuticals	Consumer	Not Specified	-	11-JAN-2024	15-MAR-2024	US	Not Specified	US-LANTHEUS MEDICAL IMAGING-LMI-2024-00039	-	-
330	19	23638024	Pylarify	Piflufolastat F-18	Scan	Drug Ineffective;Radioisotope Scan Abnormal	Non-Serious	Non-Serious	Male	-	15-MAR-2024	Non-Expedited	Not Specified	Not Specified	Progenics Pharmaceuticals	Healthcare Professional	Not Specified	-	05-FEB-2024	15-MAR-2024	US	Not Specified	US-LANTHEUS MEDICAL IMAGING-LMI-2024-00152	-	-
331	20	23638023	Pylarify	Piflufolastat F-18	Scan	Drug Ineffective;Radioisotope Scan Abnormal	Non-Serious	Non-Serious	Male	24-JAN-2024	15-MAR-2024	Non-Expedited	Not Specified	Not Specified	Progenics Pharmaceuticals	Consumer	Not Specified	-	25-JAN-2024	15-MAR-2024	US	Not Specified	US-LANTHEUS MEDICAL IMAGING-LMI-2024-00101	-	-
332	21	23638022	Pylarify	Piflufolastat F-18	Scan	Radioisotope Scan Abnormal	Non-Serious	Non-Serious	Not Specified	19-JAN-2024	15-MAR-2024	Non-Expedited	Not Specified	Not Specified	Progenics Pharmaceuticals	Consumer	Not Specified	-	19-JAN-2024	15-MAR-2024	US	Not Specified	US-LANTHEUS MEDICAL IMAGING-LMI-2024-00079	-	-
333	22	23638021	Pylarify	Piflufolastat F-18	Positron Emission Tomogram	Vomiting;Migraine;Nausea;Headache	Non-Serious	Non-Serious	Male	11-JAN-2024	15-MAR-2024	Non-Expedited	74 YR	112 KG	Progenics Pharmaceuticals	Consumer	Not Specified	-	07-FEB-2024	15-MAR-2024	US	Not Specified	US-LANTHEUS MEDICAL IMAGING-LMI-2024-00047	-	-
334	23	23638020	Pylarify	Piflufolastat F-18	Scan	Drug Ineffective	Non-Serious	Non-Serious	Male	08-DEC-2023	15-MAR-2024	Non-Expedited	46 YR	Not Specified	Progenics Pharmaceuticals	Consumer	Not Specified	-	14-DEC-2023	15-MAR-2024	US	Not Specified	US-LANTHEUS MEDICAL IMAGING-LMI-2023-01479	-	-
335	24	22987953	Casodex;Pylarify	Piflufolastat F-18;Bicalutamide	Positron Emission Tomogram;Prostate Cancer Recurrent	Radioisotope Scan Abnormal	Non-Serious	Non-Serious	Male	03-AUG-2023	19-DEC-2023	Non-Expedited	73 YR	Not Specified	Progenics Pharmaceuticals	Healthcare Professional	Not Specified	Dutasteride	07-SEP-2023	26-SEP-2023	US	Not Specified	US-PROGENICS PHARMACEUTICALS, INC.-LMI-2023-00946	-	-
336	25	23310544	Pylarify	Piflufolastat F-18	Scan	Radioisotope Scan Abnormal	Non-Serious	Non-Serious	Male	-	18-DEC-2023	Non-Expedited	Not Specified	Not Specified	Progenics Pharmaceuticals	Consumer	Not Specified	-	17-NOV-2023	18-DEC-2023	US	Not Specified	US-PROGENICS PHARMACEUTICALS, INC.-LMI-2023-01372	-	-
337	26	23310539	Pylarify	Piflufolastat F-18	Product Used For Unknown Indication;Scan	Radioisotope Scan Abnormal	Non-Serious	Non-Serious	Male	22-SEP-2023	18-DEC-2023	Non-Expedited	Not Specified	Not Specified	Progenics Pharmaceuticals	Consumer	Not Specified	Omeprazole;Atorvastatin	26-SEP-2023	18-DEC-2023	US	Not Specified	US-PROGENICS PHARMACEUTICALS, INC.-LMI-2023-01279	-	-
338	27	23310538	Pylarify	Piflufolastat F-18	Product Used For Unknown Indication	Occupational Exposure To Radiation	Non-Serious	Non-Serious	Female	24-OCT-2023	18-DEC-2023	Non-Expedited	Not Specified	Not Specified	Progenics Pharmaceuticals	Consumer	Not Specified	-	25-OCT-2023	18-DEC-2023	US	Not Specified	US-PROGENICS PHARMACEUTICALS , INC.-LMI-2023-01295	-	-
339	28	23310531	Pylarify	Piflufolastat F-18	Product Used For Unknown Indication	Wrong Product Administered;Product Administration Error;Off Label Use	Non-Serious	Non-Serious	Female	16-NOV-2023	18-DEC-2023	Non-Expedited	84 YR	Not Specified	Progenics Pharmaceuticals	Healthcare Professional	Not Specified	Keytruda	17-NOV-2023	18-DEC-2023	US	Not Specified	US-PROGENICS PHARMACEUTICALS, INC.-LMI-2023-01362	-	-
340	29	23310527	Pylarify	Piflufolastat F-18	Scan	Radioisotope Scan Abnormal	Non-Serious	Non-Serious	Male	-	18-DEC-2023	Non-Expedited	Not Specified	Not Specified	Progenics Pharmaceuticals	Consumer	Not Specified	-	17-NOV-2023	18-DEC-2023	US	Not Specified	US-PROGENICS PHARMACEUTICALS, INC.-LMI-2023-01373	-	-
341	30	23310506	Pylarify	Piflufolastat F-18	Product Used For Unknown Indication	Intercepted Product Dispensing Error	Non-Serious	Non-Serious	Not Specified	16-NOV-2023	18-DEC-2023	Non-Expedited	Not Specified	Not Specified	Progenics Pharmaceuticals	Consumer	Not Specified	-	16-NOV-2023	18-DEC-2023	US	Not Specified	US-PROGENICS PHARMACEUTICALS, INC.-LMI-2023-01370	-	-
342	31	23310505	Pylarify	Piflufolastat F-18	Scan	Radioisotope Scan Abnormal	Non-Serious	Non-Serious	Male	-	18-DEC-2023	Non-Expedited	Not Specified	Not Specified	Progenics Pharmaceuticals	Healthcare Professional	Not Specified	-	03-OCT-2023	18-DEC-2023	US	Not Specified	US-PROGENICS PHARMACEUTICALS, INC.-LMI-2023-01289	-	-
343	32	23310504	Pylarify	Piflufolastat F-18	Scan	Radioisotope Scan Abnormal	Non-Serious	Non-Serious	Male	-	18-DEC-2023	Non-Expedited	Not Specified	Not Specified	Progenics Pharmaceuticals	Consumer	Not Specified	-	17-NOV-2023	18-DEC-2023	US	Not Specified	US-PROGENICS PHARMACEUTICALS, INC.-LMI-2023-01371	-	-
344	33	23310408	Pylarify	Piflufolastat F-18	Scan	Radioisotope Scan Abnormal;Drug Ineffective	Non-Serious	Non-Serious	Male	25-JUL-2023	18-DEC-2023	Non-Expedited	72 YR	77 KG	Progenics Pharmaceuticals	Healthcare Professional	Not Specified	-	04-OCT-2023	18-DEC-2023	US	Not Specified	US-PROGENICS PHARMACEUTICALS, INC.-LMI-2023-01185	-	-
345	34	23310407	Pylarify	Piflufolastat F-18	Scan	Radioisotope Scan Abnormal	Non-Serious	Non-Serious	Male	14-SEP-2023	18-DEC-2023	Non-Expedited	Not Specified	Not Specified	Progenics Pharmaceuticals	Healthcare Professional	Not Specified	-	15-SEP-2023	18-DEC-2023	US	Not Specified	US-PROGENICS PHARMACEUTICALS-LMI-2023-01110	-	-
346	35	23310406	Pylarify	Piflufolastat F-18	Scan	Radioisotope Scan Abnormal;Drug Ineffective	Non-Serious	Non-Serious	Male	04-OCT-2023	18-DEC-2023	Non-Expedited	57 YR	84 KG	Progenics Pharmaceuticals	Consumer	Not Specified	-	17-OCT-2023	18-DEC-2023	US	Not Specified	US-PROGENICS PHARMACEUTICALS, INC.-LMI-2023-01187	-	-
347	36	23310405	Pylarify	Piflufolastat F-18	Positron Emission Tomogram	Radioisotope Scan Abnormal	Non-Serious	Non-Serious	Male	28-AUG-2023	18-DEC-2023	Non-Expedited	Not Specified	Not Specified	Progenics Pharmaceuticals	Consumer	Not Specified	-	30-AUG-2023	18-DEC-2023	US	Not Specified	US-PROGENICS PHARMACEUTICALS-LMI-2023-01053	-	-
348	37	23310404	Pylarify	Piflufolastat F-18	Positron Emission Tomogram	Radioisotope Scan Abnormal;Therapeutic Response Unexpected	Non-Serious	Non-Serious	Male	-	18-DEC-2023	Non-Expedited	Not Specified	Not Specified	Progenics Pharmaceuticals	Healthcare Professional	Not Specified	-	27-SEP-2023	18-DEC-2023	US	Not Specified	US-PROGENICS PHARMACEUTICALS, INC.-LMI-2023-01203	-	-
349	38	23310403	Pylarify	Piflufolastat F-18	Positron Emission Tomogram	Radioisotope Scan Abnormal	Non-Serious	Non-Serious	Male	28-AUG-2023	18-DEC-2023	Non-Expedited	Not Specified	Not Specified	Progenics Pharmaceuticals	Consumer	Not Specified	-	30-AUG-2023	18-DEC-2023	US	Not Specified	US-PROGENICS PHARMACEUTICALS-LMI-2023-01054	-	-
350	39	23310402	Pylarify	Piflufolastat F-18	Positron Emission Tomogram	Radioisotope Scan Abnormal	Non-Serious	Non-Serious	Male	28-AUG-2023	18-DEC-2023	Non-Expedited	Not Specified	Not Specified	Progenics Pharmaceuticals	Consumer	Not Specified	-	30-AUG-2023	18-DEC-2023	US	Not Specified	US-PROGENICS PHARMACEUTICALS-LMI-2023-01055	-	-
351	40	23310401	Pylarify	Piflufolastat F-18	Positron Emission Tomogram	Catheter Site Pustule;Penile Pain;Penile Erythema;Penile Ulceration;Penile Discomfort	Non-Serious	Non-Serious	Male	20-SEP-2023	18-DEC-2023	Non-Expedited	77 YR	113 KG	Progenics Pharmaceuticals	Consumer	Not Specified	-	20-SEP-2023	18-DEC-2023	US	Not Specified	US-PROGENICS PHARMACEUTICALS-LMI-2023-01118	-	-
352	41	23310400	Pylarify	Piflufolastat F-18	Prostate Cancer	Intercepted Medication Error;Product Dose Omission Issue	Non-Serious	Non-Serious	Male	14-SEP-2023	18-DEC-2023	Non-Expedited	74 YR	88 KG	Progenics Pharmaceuticals	Consumer	Not Specified	-	14-SEP-2023	18-DEC-2023	US	Not Specified	US-PROGENICS PHARMACEUTICALS-LMI-2023-01107	-	-
353	42	23310399	Pylarify	Piflufolastat F-18	Positron Emission Tomogram	Drug Ineffective;Radioisotope Scan Abnormal	Non-Serious	Non-Serious	Male	-	18-DEC-2023	Non-Expedited	70 YR	Not Specified	Progenics Pharmaceuticals	Healthcare Professional	Not Specified	-	13-OCT-2023	18-DEC-2023	US	Not Specified	US-PROGENICS PHARMACEUTICALS, INC.-LMI-2023-01230	-	-
354	43	23310168	Pylarify	Piflufolastat F-18	Scan	Radioisotope Scan Abnormal	Non-Serious	Non-Serious	Male	-	18-DEC-2023	Non-Expedited	Not Specified	Not Specified	Progenics Pharmaceuticals	Consumer	Not Specified	-	01-NOV-2023	18-DEC-2023	US	Not Specified	US-PROGENICS PHARMACEUTICALS, INC.-LMI-2023-01299	-	-
355	44	20983315	Pylarify	Piflufolastat F-18	Positron Emission Tomogram Prostate;Product Used For Unknown Indication	Radioisotope Scan Abnormal	Non-Serious	Non-Serious	Male	14-APR-2022	18-DEC-2023	Non-Expedited	Not Specified	Not Specified	Progenics Pharmaceuticals	Consumer	Not Specified	Nystatin	05-SEP-2023	20-JUN-2022	US	Not Specified	US-PROGENICS PHARMACEUTICALS, INC.-LMI-2022-00434	-	-
356	45	22987955	Pylarify	Piflufolastat F-18	Positron Emission Tomogram Prostate;Product Used For Unknown Indication	Drug Ineffective;Radioisotope Scan Abnormal	Non-Serious	Non-Serious	Male	02-AUG-2023	26-SEP-2023	Non-Expedited	71 YR	86 KG	Progenics Pharmaceuticals	Consumer	Not Specified	Metformin;Omeprazole;Crestor;Lopressor;Norvasc;Flonase;Lexapro;Proscar;Cozaar;Aspirin	03-AUG-2023	26-SEP-2023	US	Not Specified	US-PROGENICS PHARMACEUTICALS, INC.-LMI-2023-00930	-	-
357	46	22987954	Pylarify	Piflufolastat F-18	Positron Emission Tomogram	Radioisotope Scan Abnormal	Non-Serious	Non-Serious	Male	08-AUG-2023	26-SEP-2023	Non-Expedited	70 YR	89 KG	Progenics Pharmaceuticals	Consumer	Not Specified	-	09-AUG-2023	26-SEP-2023	US	Not Specified	US-PROGENICS PHARMACEUTICALS, INC.-LMI-2023-00954	-	-
358	47	22987952	Pylarify	Piflufolastat F-18;Unspecified Ingredient	Computerised Tomogram;Positron Emission Tomogram	Blister;Hypersensitivity;Peripheral Swelling;Rash;Pruritus	Non-Serious	Non-Serious	Male	16-MAY-2023	26-SEP-2023	Non-Expedited	75 YR	Not Specified	Progenics Pharmaceuticals	Consumer	Not Specified	-	31-MAY-2023	26-SEP-2023	US	Not Specified	US-LANTHEUS-LMI-2023-00669	-	-
359	48	22987951	Pylarify	Piflufolastat F-18	Scan	Radioisotope Scan Abnormal	Non-Serious	Non-Serious	Male	-	26-SEP-2023	Non-Expedited	Not Specified	Not Specified	Progenics Pharmaceuticals	Consumer	Not Specified	-	17-AUG-2023	26-SEP-2023	US	Not Specified	US-PROGENICS PHARMACEUTICALS, INC.-LMI-2023-00988	-	-
360	49	22987950	Pylarify	Piflufolastat F-18	Positron Emission Tomogram Prostate	Radioisotope Scan Abnormal	Non-Serious	Non-Serious	Male	03-AUG-2023	26-SEP-2023	Non-Expedited	Not Specified	Not Specified	Progenics Pharmaceuticals	Healthcare Professional	Not Specified	-	03-AUG-2023	26-SEP-2023	US	Not Specified	US-PROGENICS PHARMACEUTICALS, INC.-LMI-2023-00947	-	-
361	50	22973656	Pylarify	Piflufolastat F-18	Positron Emission Tomogram Prostate	Radioisotope Scan Abnormal	Non-Serious	Non-Serious	Male	17-FEB-2023	22-SEP-2023	Non-Expedited	Not Specified	Not Specified	Progenics Pharmaceuticals	Consumer	Not Specified	-	06-JUL-2023	22-SEP-2023	US	Not Specified	US-LANTHEUS-LMI-2023-00817	-	-
362	51	22973655	Pylarify	Piflufolastat F-18	Product Used For Unknown Indication	Accidental Exposure To Product	Non-Serious	Non-Serious	Female	-	22-SEP-2023	Non-Expedited	Not Specified	Not Specified	Progenics Pharmaceuticals	Consumer	Not Specified	-	27-JUL-2023	22-SEP-2023	US	Not Specified	US-LANTHEUS-LMI-2023-00901	-	-
363	52	22973654	Pylarify	Piflufolastat F-18	Product Used For Unknown Indication	Parosmia;Nausea;Product Taste Abnormal	Non-Serious	Non-Serious	Male	04-AUG-2023	22-SEP-2023	Non-Expedited	65 YR	100 KG	Progenics Pharmaceuticals	Consumer	Not Specified	-	04-AUG-2023	22-SEP-2023	US	Not Specified	US-PROGENICS PHARMACEUTICALS, INC.-LMI-2023-00937	-	-
364	53	22613065	Pylarify	Piflufolastat F-18	Product Used For Unknown Indication;Scan	False Negative Investigation Result	Non-Serious	Non-Serious	Male	06-JAN-2023	18-JUN-2023	Non-Expedited	Not Specified	Not Specified	Progenics Pharmaceuticals	Consumer	Not Specified	Radiation Therapy	25-MAY-2023	18-JUN-2023	US	Not Specified	US-LANTHEUS-LMI-2023-00658	-	-
365	54	22613064	Pylarify	Piflufolastat F-18	Positron Emission Tomogram	Radiation Underdose;Off Label Use	Non-Serious	Non-Serious	Male	25-MAY-2023	18-JUN-2023	Non-Expedited	Not Specified	Not Specified	Progenics Pharmaceuticals	Consumer	Not Specified	-	25-MAY-2023	18-JUN-2023	US	Not Specified	US-PROGENICS PHARMACEUTICALS, INC.-LMI-2023-00656	-	-
366	55	22613063	Pylarify	Piflufolastat F-18	Positron Emission Tomogram	Radiation Underdose;Off Label Use	Non-Serious	Non-Serious	Male	25-MAY-2023	18-JUN-2023	Non-Expedited	Not Specified	Not Specified	Progenics Pharmaceuticals	Consumer	Not Specified	-	25-MAY-2023	18-JUN-2023	US	Not Specified	US-PROGENICS PHARMACEUTICALS, INC.-LMI-2023-00655	-	-
367	56	22613062	Pylarify	Piflufolastat F-18	Positron Emission Tomogram Prostate	False Negative Investigation Result	Non-Serious	Non-Serious	Male	-	18-JUN-2023	Non-Expedited	Not Specified	Not Specified	Progenics Pharmaceuticals	Healthcare Professional	Not Specified	-	08-APR-2023	18-JUN-2023	US	Not Specified	US-PROGENICS PHARMACEUTICALS, INC.-LMI-2023-00645	-	-
368	57	22613061	Pylarify	Piflufolastat F-18	Positron Emission Tomogram Prostate	False Negative Investigation Result	Non-Serious	Non-Serious	Male	-	18-JUN-2023	Non-Expedited	Not Specified	Not Specified	Progenics Pharmaceuticals	Healthcare Professional	Not Specified	-	08-APR-2023	18-JUN-2023	US	Not Specified	US-PROGENICS PHARMACEUTICALS, INC.-LMI-2023-00644	-	-
369	58	22613060	Pylarify	Piflufolastat F-18	Product Used For Unknown Indication;Prostate Cancer Recurrent	Arthralgia	Non-Serious	Non-Serious	Male	31-JAN-2023	18-JUN-2023	Non-Expedited	74 YR	Not Specified	Progenics Pharmaceuticals	Consumer	Not Specified	Lisinopril;Acetaminophen\Hydrocodone;Wellbutrin;Aleve;Hydrochlorothiazide;Albuterol	09-MAY-2023	18-JUN-2023	US	Not Specified	US-PROGENICS PHARMACEUTICALS, INC.-LMI-2023-00563	-	-
370	59	22613059	Pylarify	Piflufolastat F-18	Product Used For Unknown Indication	Radioisotope Scan Abnormal;Drug Ineffective	Non-Serious	Non-Serious	Not Specified	27-APR-2023	18-JUN-2023	Non-Expedited	51 YR	Not Specified	Progenics Pharmaceuticals	Healthcare Professional	Not Specified	-	22-MAY-2023	18-JUN-2023	US	Not Specified	US-PROGENICS PHARMACEUTICALS, INC.-LMI-2023-00539	-	-
371	60	22613058	Pylarify	Piflufolastat F-18	Scan	Chills;Oedema Peripheral;Vomiting Projectile;Diarrhoea;Cold Sweat;Abdominal Pain;Chest Pain	Non-Serious	Non-Serious	Male	-	18-JUN-2023	Non-Expedited	73 YR	Not Specified	Progenics Pharmaceuticals	Consumer	Not Specified	-	28-APR-2023	18-JUN-2023	US	Not Specified	US-LANTHEUS-LMI-2023-00517	-	-
372	61	22613057	Pylarify	Piflufolastat F-18;Fludeoxyglucose F-18	Scan	Product Preparation Error;Wrong Product Administered	Non-Serious	Non-Serious	Male	27-MAR-2023	18-JUN-2023	Non-Expedited	Not Specified	Not Specified	Progenics Pharmaceuticals	Consumer	Not Specified	-	28-MAR-2023	18-JUN-2023	US	Not Specified	US-LANTHEUS-LMI-2023-00389	-	-
373	62	22613056	Pylarify	Piflufolastat F-18;Fludeoxyglucose F-18	Scan	Wrong Product Administered;Product Preparation Error	Non-Serious	Non-Serious	Male	27-MAR-2023	18-JUN-2023	Non-Expedited	Not Specified	Not Specified	Progenics Pharmaceuticals	Consumer	Not Specified	-	28-MAR-2023	18-JUN-2023	US	Not Specified	US-LANTHEUS-LMI-2023-00382	-	-
374	63	22613055	Pylarify	Piflufolastat F-18	Positron Emission Tomogram	Somnolence;Dizziness;Gait Disturbance	Non-Serious	Non-Serious	Male	21-MAR-2023	18-JUN-2023	Non-Expedited	6 DEC	127 KG	Progenics Pharmaceuticals	Consumer	Not Specified	-	02-MAY-2023	18-JUN-2023	US	Not Specified	US-LANTHEUS-LMI-2023-00341	-	-
375	64	22613054	Pylarify	Piflufolastat F-18	Product Used For Unknown Indication;Prostate Cancer;Scan	Radioisotope Scan Abnormal;Drug Ineffective	Non-Serious	Non-Serious	Male	16-MAR-2023	18-JUN-2023	Non-Expedited	57 YR	99 KG	Progenics Pharmaceuticals	Healthcare Professional	Not Specified	Barium Sulfate;Iohexol	24-MAR-2023	18-JUN-2023	US	Not Specified	US-LANTHEUS-LMI-2023-00340	-	-
376	65	22613053	Pylarify	Piflufolastat F-18	Product Used For Unknown Indication;Prostate Cancer;Scan	Drug Ineffective;Radioisotope Scan Abnormal	Non-Serious	Non-Serious	Male	16-MAR-2023	18-JUN-2023	Non-Expedited	84 YR	78 KG	Progenics Pharmaceuticals	Healthcare Professional	Not Specified	Barium Sulfate;Omeprazole;Metoprolol;Hydroxychloroquine;Clopidogrel;Atorvastatin;Iohexol;Spironolactone	24-MAR-2023	18-JUN-2023	US	Not Specified	US-LANTHEUS-LMI-2023-00339	-	-
377	66	22613052	Pylarify	Piflufolastat F-18	Product Used For Unknown Indication;Prostate Cancer;Scan	Drug Ineffective;Radioisotope Scan Abnormal	Non-Serious	Non-Serious	Male	16-MAR-2023	18-JUN-2023	Non-Expedited	61 YR	76 KG	Progenics Pharmaceuticals	Healthcare Professional	Not Specified	Atorvastatin;Clopidogrel;Barium Sulfate;Spironolactone;Metoprolol;Hydroxychloroquine;Iohexol;Omeprazole	24-MAR-2023	18-JUN-2023	US	Not Specified	US-LANTHEUS-LMI-2023-00303	-	-
378	67	22613051	Pylarify	Piflufolastat F-18	Scan	Drug Ineffective;Radioisotope Scan Abnormal	Non-Serious	Non-Serious	Male	16-MAR-2023	18-JUN-2023	Non-Expedited	79 YR	Not Specified	Progenics Pharmaceuticals	Healthcare Professional	Not Specified	-	17-MAR-2023	18-JUN-2023	US	Not Specified	US-LANTHEUS-LMI-2023-00302	-	-
379	68	22613050	Pylarify	Piflufolastat F-18	Scan	Radioisotope Scan Abnormal;Drug Ineffective	Non-Serious	Non-Serious	Male	16-MAR-2023	18-JUN-2023	Non-Expedited	81 YR	Not Specified	Progenics Pharmaceuticals	Healthcare Professional	Not Specified	-	17-MAR-2023	18-JUN-2023	US	Not Specified	US-LANTHEUS-LMI-2023-00301	-	-
380	69	22613049	Pylarify	Piflufolastat F-18	Positron Emission Tomogram;Prostate Cancer	Radioisotope Scan Abnormal	Non-Serious	Non-Serious	Male	27-FEB-2023	18-JUN-2023	Non-Expedited	65 YR	70 KG	Progenics Pharmaceuticals	Consumer	Not Specified	Denosumab	28-FEB-2023	18-JUN-2023	US	Not Specified	US-LANTHEUS-LMI-2023-00227	-	-
381	70	22124061	Pylarify	Piflufolastat F-18	Product Used For Unknown Indication;Scan	Radioisotope Scan Abnormal;Drug Ineffective	Non-Serious	Non-Serious	Male	30-JAN-2023	18-JUN-2023	Non-Expedited	69 YR	99.773 KG	Progenics Pharmaceuticals	Healthcare Professional	Not Specified	Prilosec	24-MAR-2023	22-MAR-2023	US	Not Specified	US-PROGENICS PHARMACEUTICALS, INC.-LMI-2023-00155	-	-
382	71	22124072	Pylarify	Piflufolastat F-18	Scan	Drug Ineffective;Radioisotope Scan Abnormal	Non-Serious	Non-Serious	Not Specified	13-FEB-2023	22-MAR-2023	Non-Expedited	Not Specified	Not Specified	Progenics Pharmaceuticals	Healthcare Professional	Not Specified	-	13-FEB-2023	22-MAR-2023	US	Not Specified	US-PROGENICS PHARMACEUTICALS, INC.-LMI-2023-00163	-	-
383	72	22124070	Pylarify	Piflufolastat F-18	Scan	Radioisotope Scan Abnormal;Drug Ineffective	Non-Serious	Non-Serious	Male	-	22-MAR-2023	Non-Expedited	Not Specified	Not Specified	Progenics Pharmaceuticals	Healthcare Professional	Not Specified	-	07-FEB-2023	22-MAR-2023	US	Not Specified	US-PROGENICS PHARMACEUTICALS, INC.-LMI-2023-00162	-	-
384	73	22124066	Pylarify	Piflufolastat F-18	Scan	Drug Ineffective;Radioisotope Scan Abnormal	Non-Serious	Non-Serious	Male	-	22-MAR-2023	Non-Expedited	Not Specified	Not Specified	Progenics Pharmaceuticals	Consumer	Not Specified	-	03-FEB-2023	22-MAR-2023	US	Not Specified	US-PROGENICS PHARMACEUTICALS, INC.-LMI-2023-00160	-	-
385	74	22124053	Pylarify	Piflufolastat F-18	Scan	Drug Ineffective;Radioisotope Scan Abnormal	Non-Serious	Non-Serious	Not Specified	06-FEB-2023	22-MAR-2023	Non-Expedited	Not Specified	Not Specified	Progenics Pharmaceuticals	Healthcare Professional	Not Specified	-	06-FEB-2023	22-MAR-2023	US	Not Specified	US-PROGENICS PHARMACEUTICALS, INC.-LMI-2023-00138	-	-
386	75	22124046	Pylarify	Piflufolastat F-18	Positron Emission Tomogram	Radioisotope Scan Abnormal;Drug Ineffective	Non-Serious	Non-Serious	Male	05-JAN-2023	22-MAR-2023	Non-Expedited	68 YR	Not Specified	Progenics Pharmaceuticals	Consumer	Not Specified	-	06-JAN-2023	22-MAR-2023	US	Not Specified	US-PROGENICS PHARMACEUTICALS, INC.-LMI-2023-00017	-	-
387	76	22124042	Pylarify	Piflufolastat F-18	Scan	Radioisotope Scan Abnormal;Drug Ineffective	Non-Serious	Non-Serious	Male	20-DEC-2022	22-MAR-2023	Non-Expedited	Not Specified	Not Specified	Progenics Pharmaceuticals	Consumer	Not Specified	-	03-JAN-2023	22-MAR-2023	US	Not Specified	US-PROGENICS PHARMACEUTICALS, INC.-LMI-2023-00004	-	-
388	77	22124029	Pylarify	Piflufolastat F-18	Scan	Drug Ineffective;Radioisotope Scan Abnormal	Non-Serious	Non-Serious	Male	15-NOV-2022	22-MAR-2023	Non-Expedited	Not Specified	Not Specified	Progenics Pharmaceuticals	Consumer	Not Specified	-	03-JAN-2023	22-MAR-2023	US	Not Specified	US-PROGENICS PHARMACEUTICALS, INC.-LMI-2023-00003	-	-
389	78	22124028	Pylarify	Piflufolastat F-18	Positron Emission Tomogram	Radioisotope Scan Abnormal	Non-Serious	Non-Serious	Male	21-NOV-2022	22-MAR-2023	Non-Expedited	Not Specified	86 KG	Progenics Pharmaceuticals	Healthcare Professional	Not Specified	-	06-DEC-2022	22-MAR-2023	US	Not Specified	US-PROGENICS PHARMACEUTICALS, INC.-LMI-2022-01492	-	-
390	79	20983312	Pylarify	Piflufolastat F-18	Product Used For Unknown Indication;Prostatic Specific Antigen Increased	Radioisotope Scan Abnormal;Drug Ineffective	Non-Serious	Non-Serious	Male	08-MAR-2022	22-MAR-2023	Non-Expedited	Not Specified	Not Specified	Progenics Pharmaceuticals	Healthcare Professional	Not Specified	Toprol Xl;Aspirin	10-FEB-2023	20-JUN-2022	US	Not Specified	US-PROGENICS PHARMACEUTICALS, INC.-LMI-2022-00260	-	-
391	80	21907988	Pylarify	Piflufolastat F-18	Prostate Cancer;Scan With Contrast	Dialysis;Blood Pressure Abnormal;Hemihypoaesthesia	Serious	Other Outcomes	Male	28-DEC-2022	24-JAN-2023	Direct	69 YR	99.9 KG	Fda-Ctu	Consumer	Not Specified	Multi-Vitamin;Velphoro;Magnesium;Warfarin;Fenofibrate;Duloxetine;Folic Acid;Tradjenta;Pantoprazole Sodium	-	24-JAN-2023	Not Specified	Not Specified	-	-	-
392	81	21750004	Pylarify	Piflufolastat F-18	Positron Emission Tomogram;Product Used For Unknown Indication	Radioisotope Scan Abnormal;Drug Ineffective	Non-Serious	Non-Serious	Male	21-OCT-2022	19-DEC-2022	Non-Expedited	59 YR	111 KG	Progenics Pharmaceuticals	Healthcare Professional	Not Specified	Ambien;Detrol La;Xanax;Androgel;Antivert;Acetaminophen\Hydrocodone;Cialis	28-OCT-2022	19-DEC-2022	US	Not Specified	US-LANTHEUS-LMI-2022-01313	-	-
393	82	21749995	Pylarify	Piflufolastat F-18	Product Used For Unknown Indication	Drug Ineffective;Radioisotope Scan Abnormal	Non-Serious	Non-Serious	Male	27-SEP-2022	19-DEC-2022	Non-Expedited	73 YR	83 KG	Progenics Pharmaceuticals	Healthcare Professional	Not Specified	-	28-SEP-2022	19-DEC-2022	US	Not Specified	US-LANTHEUS-LMI-2022-01183	-	-
394	83	21749993	Pylarify	Piflufolastat F-18	Scan	Drug Ineffective	Non-Serious	Non-Serious	Not Specified	-	19-DEC-2022	Non-Expedited	Not Specified	Not Specified	Progenics Pharmaceuticals	Healthcare Professional	Not Specified	-	16-SEP-2022	19-DEC-2022	US	Not Specified	US-LANTHEUS-LMI-2022-01150	-	-
395	84	21485588	Pylarify	Piflufolastat F-18	Product Used For Unknown Indication	Vomiting;Nausea;Headache;Syncope;Dizziness	Serious	Other Outcomes	Male	11-OCT-2022	20-OCT-2022	Expedited	68 YR	82 KG	Progenics Pharmaceuticals	Consumer	Not Specified	-	11-OCT-2022	20-OCT-2022	US	Not Specified	US-PROGENICS PHARMACEUTICALS, INC.-LMI-2022-01235	-	-
396	85	21344943	Pylarify	Piflufolastat F-18	Product Used For Unknown Indication	Wrong Product Administered;Drug Ineffective;Product Dispensing Error	Non-Serious	Non-Serious	Not Specified	02-AUG-2022	16-SEP-2022	Non-Expedited	Not Specified	Not Specified	Progenics Pharmaceuticals	Healthcare Professional	Not Specified	-	08-AUG-2022	16-SEP-2022	US	Not Specified	US-PROGENICS PHARMACEUTICALS, INC.-LMI-2022-01041	-	-
397	86	21344914	Pylarify	Piflufolastat F-18	Positron Emission Tomogram;Product Used For Unknown Indication	Dysuria	Non-Serious	Non-Serious	Male	02-AUG-2022	16-SEP-2022	Non-Expedited	59 YR	90 KG	Progenics Pharmaceuticals	Consumer	Not Specified	Tamsulosin;Levaquin	04-AUG-2022	16-SEP-2022	US	Not Specified	US-PROGENICS PHARMACEUTICALS, INC.-LMI-2022-00924	-	-
398	87	21344887	Pylarify	Piflufolastat F-18	Product Used For Unknown Indication	Radioisotope Scan Abnormal;Drug Ineffective	Non-Serious	Non-Serious	Not Specified	22-JUL-2022	16-SEP-2022	Non-Expedited	Not Specified	Not Specified	Progenics Pharmaceuticals	Consumer	Not Specified	-	22-JUL-2022	16-SEP-2022	US	Not Specified	US-PROGENICS PHARMACEUTICALS, INC.-LMI-2022-00880	-	-
399	88	21344846	Pylarify	Piflufolastat F-18	Positron Emission Tomogram	Product Dose Omission Issue;Product Preparation Error	Non-Serious	Non-Serious	Male	14-JUL-2022	16-SEP-2022	Non-Expedited	Not Specified	Not Specified	Progenics Pharmaceuticals	Consumer	Not Specified	-	14-JUL-2022	16-SEP-2022	US	Not Specified	US-PROGENICS PHARMACEUTICALS, INC.-LMI-2022-00833	-	-
400	89	21344821	Pylarify	Piflufolastat F-18	Product Used For Unknown Indication	Intercepted Product Preparation Error	Non-Serious	Non-Serious	Not Specified	-	16-SEP-2022	Non-Expedited	Not Specified	Not Specified	Progenics Pharmaceuticals	Consumer	Not Specified	-	16-JUN-2022	16-SEP-2022	US	Not Specified	US-PROGENICS PHARMACEUTICALS, INC.-LMI-2022-00723	-	-
401	90	21344787	Pylarify	Piflufolastat F-18	Product Used For Unknown Indication	Product Dose Omission Issue;Product Preparation Error	Non-Serious	Non-Serious	Not Specified	-	16-SEP-2022	Non-Expedited	Not Specified	Not Specified	Progenics Pharmaceuticals	Consumer	Not Specified	-	16-JUN-2022	16-SEP-2022	US	Not Specified	US-PROGENICS PHARMACEUTICALS, INC.-LMI-2022-00722	-	-
402	91	21344779	Pylarify	Piflufolastat F-18	Product Used For Unknown Indication	Dizziness;Fatigue	Non-Serious	Non-Serious	Male	13-JUN-2022	16-SEP-2022	Non-Expedited	73 YR	135 KG	Progenics Pharmaceuticals	Consumer	Not Specified	-	16-JUN-2022	16-SEP-2022	US	Not Specified	US-PROGENICS PHARMACEUTICALS, INC.-LMI-2022-00691	-	-
403	92	20983320	Pylarify	Piflufolastat F-18	Positron Emission Tomogram;Product Used For Unknown Indication	Weight Decreased;Thirst;Dry Mouth;Fatigue;Headache;Oral Candidiasis;Oral Pain;Cheilitis;Lip Dry;Stomatitis;Salivary Gland Disorder;Glossodynia;Chapped Lips	Non-Serious	Non-Serious	Male	09-MAY-2022	20-JUN-2022	Non-Expedited	58 YR	84 KG	Progenics Pharmaceuticals	Consumer	Not Specified	Erleada;Orgovyx	10-MAY-2022	20-JUN-2022	US	Not Specified	US-PROGENICS PHARMACEUTICALS, INC.-LMI-2022-00533	-	-
404	93	20983319	Pylarify	Piflufolastat F-18	Product Used For Unknown Indication	Product Dispensing Error	Non-Serious	Non-Serious	Male	06-MAY-2022	20-JUN-2022	Non-Expedited	Not Specified	Not Specified	Progenics Pharmaceuticals	Consumer	Not Specified	-	06-MAY-2022	20-JUN-2022	US	Not Specified	US-PROGENICS PHARMACEUTICALS, INC.-LMI-2022-00517	-	-
405	94	20983318	Pylarify	Piflufolastat F-18	Product Used For Unknown Indication	Intercepted Product Dispensing Error	Non-Serious	Non-Serious	Male	29-APR-2022	20-JUN-2022	Non-Expedited	Not Specified	Not Specified	Progenics Pharmaceuticals	Consumer	Not Specified	-	06-MAY-2022	20-JUN-2022	US	Not Specified	US-PROGENICS PHARMACEUTICALS, INC.-LMI-2022-00518	-	-
406	95	20983317	Pylarify	Piflufolastat F-18	Product Used For Unknown Indication	Product Dispensing Error;Underdose	Non-Serious	Non-Serious	Not Specified	13-APR-2022	20-JUN-2022	Non-Expedited	Not Specified	Not Specified	Progenics Pharmaceuticals	Consumer	Not Specified	-	21-APR-2022	20-JUN-2022	US	Not Specified	US-PROGENICS PHARMACEUTICALS, INC.-LMI-2022-00479	-	-
407	96	20983316	Pylarify	Piflufolastat F-18	Product Used For Unknown Indication	Product Dose Omission Issue;Product Dispensing Error	Non-Serious	Non-Serious	Not Specified	20-APR-2022	20-JUN-2022	Non-Expedited	Not Specified	Not Specified	Progenics Pharmaceuticals	Healthcare Professional	Not Specified	-	20-APR-2022	20-JUN-2022	US	Not Specified	US-PROGENICS PHARMACEUTICALS, INC.-LMI-2022-00587	-	-
408	97	20983314	Pylarify	Piflufolastat F-18	Product Used For Unknown Indication	Radioisotope Scan Abnormal	Non-Serious	Non-Serious	Male	08-APR-2022	20-JUN-2022	Non-Expedited	Not Specified	Not Specified	Progenics Pharmaceuticals	Healthcare Professional	Not Specified	-	14-APR-2022	20-JUN-2022	US	Not Specified	US-PROGENICS PHARMACEUTICALS, INC.-LMI-2022-00385	-	-
409	98	20983313	Pylarify	Piflufolastat F-18	Positron Emission Tomogram	Product Dose Omission Issue;Product Dispensing Error	Non-Serious	Non-Serious	Male	05-APR-2022	20-JUN-2022	Non-Expedited	71 YR	Not Specified	Progenics Pharmaceuticals	Consumer	Not Specified	-	05-APR-2022	20-JUN-2022	US	Not Specified	US-PROGENICS PHARMACEUTICALS, INC.-LMI-2022-00362	-	-
410	99	20983311	Pylarify	Piflufolastat F-18	Prostate Cancer	Product Preparation Error;Product Dispensing Error	Non-Serious	Non-Serious	Male	02-MAR-2022	20-JUN-2022	Non-Expedited	Not Specified	Not Specified	Progenics Pharmaceuticals	Healthcare Professional	Not Specified	-	04-APR-2022	20-JUN-2022	US	Not Specified	US-PROGENICS PHARMACEUTICALS, INC.-LMI-2022-00361	-	-
411	100	20983310	Pylarify	Piflufolastat F-18	Product Used For Unknown Indication	Product Dispensing Error;Product Preparation Error;Incorrect Dose Administered	Non-Serious	Non-Serious	Male	22-MAR-2022	20-JUN-2022	Non-Expedited	Not Specified	Not Specified	Progenics Pharmaceuticals	Consumer	Not Specified	-	22-MAR-2022	20-JUN-2022	US	Not Specified	US-PROGENICS PHARMACEUTICALS, INC.-LMI-2022-00312	-	-
412	101	20983309	Pylarify	Piflufolastat F-18	Positron Emission Tomogram;Product Used For Unknown Indication	Product Administration Error;Product Dispensing Error	Non-Serious	Non-Serious	Male	23-FEB-2022	20-JUN-2022	Non-Expedited	68 YR	79 KG	Progenics Pharmaceuticals	Healthcare Professional	Not Specified	Turmeric;Vitamin B12;Vitamins Nos;Herbals\Saw Palmetto;Vitamin D Nos	04-MAR-2022	20-JUN-2022	US	Not Specified	US-PROGENICS PHARMACEUTICALS, INC.-LMI-2022-00276	-	-
413	102	20983308	Pylarify	Piflufolastat F-18	Product Used For Unknown Indication	Intercepted Product Dispensing Error	Non-Serious	Non-Serious	Not Specified	28-MAR-2022	20-JUN-2022	Non-Expedited	Not Specified	Not Specified	Progenics Pharmaceuticals	Consumer	Not Specified	-	28-MAR-2022	20-JUN-2022	US	Not Specified	US-PROGENICS PHARMACEUTICALS, INC.-LMI-2022-00327	-	-
414	103	20679855	Pylarify;Casodex	Bicalutamide;Piflufolastat F-18;Gonadorelin Diacetate Tetrahydrate	Positron Emission Tomogram;Product Used For Unknown Indication	Acute Hepatic Failure;Fatigue	Serious	Hospitalized	Male	-	06-APR-2022	Expedited	Not Specified	Not Specified	Progenics Pharmaceuticals	Healthcare Professional	Not Specified	-	24-MAR-2022	06-APR-2022	CA	Not Specified	CA-PROGENICS PHARMACEUTICALS, INC.-LMI-2022-00307	-	-
415	104	20623086	Pylarify	Piflufolastat F-18	Positron Emission Tomogram	Radioisotope Scan Abnormal;Product Preparation Error;Drug Ineffective	Non-Serious	Non-Serious	Male	16-DEC-2021	22-MAR-2022	Non-Expedited	Not Specified	Not Specified	Progenics Pharmaceuticals	Healthcare Professional	Not Specified	-	06-JAN-2022	22-MAR-2022	US	Not Specified	US-LANTHEUS-LMI-2021-01595	-	-
416	105	20623085	Pylarify	Piflufolastat F-18	Positron Emission Tomogram	Drug Ineffective;Radioisotope Scan Abnormal;Product Preparation Error	Non-Serious	Non-Serious	Male	16-DEC-2021	22-MAR-2022	Non-Expedited	Not Specified	Not Specified	Progenics Pharmaceuticals	Healthcare Professional	Not Specified	-	06-JAN-2022	22-MAR-2022	US	Not Specified	US-LANTHEUS-LMI-2021-01596	-	-
417	106	20623084	Pylarify	Piflufolastat F-18	Positron Emission Tomogram	Intercepted Product Dispensing Error	Non-Serious	Non-Serious	Male	16-DEC-2021	22-MAR-2022	Non-Expedited	Not Specified	Not Specified	Progenics Pharmaceuticals	Healthcare Professional	Not Specified	-	22-DEC-2021	22-MAR-2022	US	Not Specified	US-LANTHEUS-LMI-2021-01612	-	-
418	107	20623083	Pylarify	Piflufolastat F-18	Positron Emission Tomogram	Wrong Patient Received Product	Non-Serious	Non-Serious	Male	16-DEC-2021	22-MAR-2022	Non-Expedited	Not Specified	Not Specified	Progenics Pharmaceuticals	Healthcare Professional	Not Specified	-	22-DEC-2021	22-MAR-2022	US	Not Specified	US-LANTHEUS-LMI-2021-01611	-	-
419	108	20623082	Pylarify	Piflufolastat F-18	Prostate Cancer	Paraesthesia	Non-Serious	Non-Serious	Male	07-DEC-2021	22-MAR-2022	Non-Expedited	70 YR	Not Specified	Progenics Pharmaceuticals	Consumer	Not Specified	-	08-DEC-2021	22-MAR-2022	US	Not Specified	US-LANTHEUS-LMI-2021-01541	-	-
420	109	20623081	Pylarify	Piflufolastat F-18	Positron Emission Tomogram	Accidental Underdose	Non-Serious	Non-Serious	Male	18-NOV-2021	22-MAR-2022	Non-Expedited	72 YR	131 KG	Progenics Pharmaceuticals	Consumer	Not Specified	-	29-NOV-2021	22-MAR-2022	US	Not Specified	US-LANTHEUS-LMI-2021-01489	-	-
421	110	20181051	Pylarify	Piflufolastat F-18	Positron Emission Tomogram	Radioisotope Scan Abnormal;Drug Ineffective	Non-Serious	Non-Serious	Male	04-NOV-2021	22-MAR-2022	Non-Expedited	Not Specified	Not Specified	Progenics Pharmaceuticals	Healthcare Professional	Not Specified	-	30-NOV-2021	14-DEC-2021	US	Not Specified	US-LANTHEUS-LMI-2021-01425	-	-
422	111	20181038	Pylarify	Piflufolastat F-18	Product Used For Unknown Indication	Intercepted Product Dispensing Error	Non-Serious	Non-Serious	Not Specified	-	14-DEC-2021	Non-Expedited	Not Specified	Not Specified	Progenics Pharmaceuticals	Consumer	Not Specified	-	04-NOV-2021	14-DEC-2021	US	Not Specified	US-LANTHEUS-LMI-2021-01401	-	-
423	112	20181029	Pylarify	Piflufolastat F-18	Positron Emission Tomogram	Drug Ineffective;Radioisotope Scan Abnormal	Non-Serious	Non-Serious	Male	20-OCT-2021	14-DEC-2021	Non-Expedited	Not Specified	77 KG	Progenics Pharmaceuticals	Healthcare Professional	Not Specified	-	20-OCT-2021	14-DEC-2021	US	Not Specified	US-LANTHEUS-LMI-2021-01344	-	-
424	113	20181014	Pylarify	Piflufolastat F-18	Positron Emission Tomogram	Drug Ineffective;Radioisotope Scan Abnormal	Non-Serious	Non-Serious	Male	20-OCT-2021	14-DEC-2021	Non-Expedited	Not Specified	Not Specified	Progenics Pharmaceuticals	Healthcare Professional	Not Specified	-	20-OCT-2021	14-DEC-2021	US	Not Specified	US-LANTHEUS-LMI-2021-01343	-	-
425	114	20180148	Pylarify	Piflufolastat F-18	Positron Emission Tomogram;Product Used For Unknown Indication	Drug Ineffective	Non-Serious	Non-Serious	Male	27-SEP-2021	14-DEC-2021	Non-Expedited	76 YR	72 KG	Progenics Pharmaceuticals	Healthcare Professional	Not Specified	Cyclophosphamide;Advil;Anastrozole;Atorvastatin;Dutasteride;Metformin	29-SEP-2021	14-DEC-2021	US	Not Specified	US-LANTHEUS-LMI-2021-01223	-	-
426	115	19857012	Pylarify	Piflufolastat F-18	Product Used For Unknown Indication	Drug Ineffective	Non-Serious	Non-Serious	Not Specified	-	20-SEP-2021	Non-Expedited	Not Specified	Not Specified	Lantheus Medical Imaging	Healthcare Professional	Not Specified	-	24-AUG-2021	20-SEP-2021	US	Not Specified	US-LANTHEUS-LMI-2021-01028	-	-
427	1	24653499	-	Fludeoxyglucose F-18	Positron Emission Tomogram	Off Label Use;Drug Ineffective	Non-Serious	Non-Serious	Male	28-MAR-2024	22-NOV-2024	Non-Expedited	Not Specified	68.0 KG	Cardinal Health	Healthcare Professional	Not Specified	-	29-MAR-2024	22-NOV-2024	US	Not Specified	US-Cardinal Health 414-NPHS-AE-24-15	-	-
428	2	24653498	-	Fludeoxyglucose F-18	Positron Emission Tomogram	Vomiting;Chest X-Ray Abnormal;Urticaria	Non-Serious	Non-Serious	Female	25-JUL-2024	22-NOV-2024	Non-Expedited	48 YR	97.1 KG	Cardinal Health	Healthcare Professional	Not Specified	-	25-JUL-2024	22-NOV-2024	US	Not Specified	US-Cardinal Health 414-NPHS-AE-24-38	-	-
429	3	24653497	Saline	Sodium Chloride;Fludeoxyglucose F-18	Positron Emission Tomogram	Dysgeusia;Off Label Use	Non-Serious	Non-Serious	Female	30-OCT-2024	22-NOV-2024	Non-Expedited	60 YR	Not Specified	Cardinal Health	Healthcare Professional	Not Specified	-	30-OCT-2024	22-NOV-2024	US	Not Specified	US-Cardinal Health 414-NPHS-AE-24-64	-	-
430	4	24653496	-	Fludeoxyglucose F-18	Positron Emission Tomogram	Off Label Use;Dysgeusia	Non-Serious	Non-Serious	Female	30-OCT-2024	22-NOV-2024	Non-Expedited	57 YR	Not Specified	Cardinal Health	Healthcare Professional	Not Specified	Saline	30-OCT-2024	22-NOV-2024	US	Not Specified	US-Cardinal Health 414-NPHS-AE-24-65	-	-
431	5	24167673	-	Fludeoxyglucose F-18	Positron Emission Tomogram	Dyspnoea;Contrast Media Reaction;Cardiac Arrest	Serious	Died	Male	15-JUL-2024	01-AUG-2024	Direct	85 YR	78.75 KG	Fda-Ctu	Healthcare Professional	Not Specified	-	-	01-AUG-2024	Not Specified	Y	-	-	Yes
432	6	24063370	-	Fludeoxyglucose F-18;Glofitamab	Anaemia;Anxiety;B-Cell Lymphoma;Back Pain;Constipation;Cytokine Release Syndrome;Hypokalaemia;Mucosal Inflammation;Product Used For Unknown Indication	Hepatic Cytolysis	Serious	Other Outcomes	Female	31-DEC-2020	09-JUL-2024	Expedited	55 YR	64.6 KG	Siemens	Healthcare Professional	Not Specified	Erythropoietin;Alprazolam;Obinutuzumab;Midazolam;Ursodiol;Smecta;Racecadotril;Vancomycin;Methylprednisolone;Alizapride Hydrochloride;Oxycodone Hydrochloride;Rasburicase;Valacyclovir Hydrochloride;Oxygen;Amitriptyline Hydrochloride;Tocilizumab;Meropenem;Haldol;Innohep;Hexetidine;Ondansetron;Sodium Bicarbonate;Furosemide;Polaramine;Bactrim;Acetaminophen;Leucovorin Calcium;Lyrica;Potassium Chloride;…	26-JUN-2024	09-JUL-2024	FR	Not Specified	FR-SIEMENS HEALTHCARE LIMITED-PET-000056-2024	-	-
433	7	23851357	-	Fludeoxyglucose F-18	Positron Emission Tomogram	Swelling	Non-Serious	Non-Serious	Male	16-MAY-2023	14-MAY-2024	Non-Expedited	63 YR	164 KG	Siemens	Healthcare Professional	Not Specified	-	16-MAY-2023	14-MAY-2024	US	Not Specified	US-SIEMENS HEALTHCARE LIMITED-PET-000034-2023	-	-
434	8	23851349	Visipaque	Iodixanol;Fludeoxyglucose F-18	Computerised Tomogram;Imaging Procedure	Rash Maculo-Papular;Allergy Test Negative	Non-Serious	Non-Serious	Female	15-NOV-2023	14-MAY-2024	Non-Expedited	58 YR	90 KG	Siemens	Healthcare Professional	Not Specified	-	15-MAR-2024	14-MAY-2024	FR	Not Specified	FR-SIEMENS HEALTHCARE LIMITED-PET-000011-2024	-	-
435	9	23851346	-	Ivermectin;Fludeoxyglucose F-18	Positron Emission Tomogram;Product Used For Unknown Indication	Rash Maculo-Papular	Non-Serious	Non-Serious	Female	18-FEB-2024	14-MAY-2024	Non-Expedited	63 YR	66 KG	Siemens	Healthcare Professional	Not Specified	-	29-FEB-2024	14-MAY-2024	FR	Not Specified	FR-SIEMENS HEALTHCARE LIMITED-PET-000009-2024	-	-
436	10	23851342	-	Fludeoxyglucose F-18	Positron Emission Tomogram	Erythema	Non-Serious	Non-Serious	Female	04-JAN-2024	14-MAY-2024	Non-Expedited	71 YR	99 KG	Siemens	Healthcare Professional	Not Specified	-	31-JAN-2024	14-MAY-2024	FR	Not Specified	FR-SIEMENS HEALTHCARE LIMITED-PET-000005-2024	-	-
437	11	23851340	-	Fludeoxyglucose F-18	Positron Emission Tomogram	Administration Site Extravasation;Injection Site Pain;Product Administration Error;Injection Site Swelling	Non-Serious	Non-Serious	Female	15-JAN-2024	14-MAY-2024	Non-Expedited	87 YR	65 KG	Siemens	Healthcare Professional	Not Specified	-	24-JAN-2024	14-MAY-2024	FR	Not Specified	FR-SIEMENS HEALTHCARE LIMITED-PET-000002-2024	-	-
438	12	23851335	-	Fludeoxyglucose F-18	Sarcoidosis	Oedema Peripheral	Non-Serious	Non-Serious	Male	03-JAN-2024	14-MAY-2024	Non-Expedited	59 YR	89 KG	Siemens	Healthcare Professional	Not Specified	-	17-JAN-2024	14-MAY-2024	FR	Not Specified	FR-SIEMENS HEALTHCARE LIMITED-PET-000001-2024	-	-
439	13	23768234	-	Fludeoxyglucose F-18	Bladder Cancer;Positron Emission Tomogram	Cerebrovascular Accident	Serious	Hospitalized;Life Threatening	Male	13-MAY-2023	19-APR-2024	Direct	96 YR	65.25 KG	Fda-Ctu	Healthcare Professional	Not Specified	N/A	-	19-APR-2024	Not Specified	Y	-	-	Yes
440	14	23504683	Keytruda	Pembrolizumab;Fludeoxyglucose	Scan With Contrast	Cerebrovascular Accident;Off Label Use	Serious	Required Intervention;Died;Hospitalized;Life Threatening;Disabled	Male	13-MAY-2023	08-FEB-2024	Direct	96 YR	66.15 KG	Fda-Ctu	Consumer	Not Specified	Vitamins	-	08-FEB-2024	Not Specified	Not Specified	-	-	-
441	15	23459723	Illuccix	Gallium Ga-68 Gozetotide;Acapatamab;Fludeoxyglucose F-18;Pembrolizumab	Premedication;Product Used For Unknown Indication;Prophylaxis Against Dehydration;Prostate Cancer Metastatic	Uveitis;Cytokine Release Syndrome	Serious	Other Outcomes;Hospitalized	Male	05-OCT-2021	31-JAN-2024	Expedited	71 YR	Not Specified	Telix Pharmaceuticals	Consumer	Not Specified	Magnesium Aspartate;Pantoprazole;Metoclopramide;Simethicone (Dimethicone);Dexamethasone;Loratadine;Temazepam;Probiotics Nos;Calcium Chloride\Potassium Chloride\Sodium Chloride\Sodium Lactate;Potassium Chloride;Sodium Chloride;Vitamin D;Ibuprofen;Ondansetron;Loperamide;Acetaminophen	19-JAN-2024	31-JAN-2024	AU	Not Specified	AU-TLX-2023000119	-	-
442	16	23447571	-	Fludeoxyglucose F-18	-	Dyspnoea;Post-Traumatic Stress Disorder;Anaphylactic Reaction;Cerebrovascular Accident;Throat Tightness	Serious	Hospitalized;Life Threatening;Required Intervention	Female	23-OCT-2023	25-JAN-2024	Direct	52 YR	Not Specified	Fda-Ctu	Consumer	Not Specified	-	-	25-JAN-2024	Not Specified	Y	-	-	-
443	17	23409534	Keytruda	Pembrolizumab;Fludeoxyglucose F-18	Bladder Cancer	Heart Rate Decreased;Ischaemic Stroke;Urinary Tract Infection;Palliative Care;Lung Disorder;Pleural Effusion;Hospice Care;Oxygen Saturation Decreased	Serious	Died;Hospitalized;Other Outcomes	Male	2023	17-JAN-2024	Expedited	Not Specified	Not Specified	Merck	Consumer	Not Specified	Morniflumate	10-JAN-2024	17-JAN-2024	US	Not Specified	US-009507513-2401USA005537	-	-
444	18	23397805	Keytruda	Pembrolizumab;Fludeoxyglucose F-18	Bladder Cancer	Urinary Tract Infection;Ischaemic Stroke;Pleural Effusion;Contrast Media Reaction	Serious	Required Intervention;Died;Life Threatening;Hospitalized;Other Outcomes;Disabled	Male	13-MAY-2023	11-JAN-2024	Direct	96 YR	66.15 KG	Fda-Ctu	Consumer	Not Specified	-	-	11-JAN-2024	Not Specified	Not Specified	-	-	-
445	19	23248369	-	Fludeoxyglucose F-18	Positron Emission Tomogram;Product Used For Unknown Indication	Injection Site Extravasation;Injection Site Oedema	Serious	Other Outcomes	Male	06-OCT-2023	01-DEC-2023	Expedited	56 YR	93 KG	Siemens	Consumer	Not Specified	Perindopril;Ezetimibe\Rosuvastatin;Kardegic;Metoprolol	18-NOV-2023	01-DEC-2023	FR	Not Specified	FR-SIEMENS HEALTHCARE LIMITED-PET-000054-2023	-	-
446	20	23204097	-	Fludeoxyglucose F-18	Positron Emission Tomogram	Infusion Site Extravasation	Serious	Other Outcomes	Male	11-OCT-2023	20-NOV-2023	Expedited	66 YR	Not Specified	Siemens	Healthcare Professional	Not Specified	-	07-NOV-2023	20-NOV-2023	FR	Not Specified	FR-SIEMENS HEALTHCARE LIMITED-PET-000053-2023	-	-
447	21	23204072	-	Fludeoxyglucose F-18	Positron Emission Tomogram;Product Used For Unknown Indication	Infusion Site Extravasation	Serious	Other Outcomes	Female	11-OCT-2023	20-NOV-2023	Expedited	54 YR	83.2 KG	Siemens	Healthcare Professional	Not Specified	Esomeprazole;Irbesartan;Oxazepam;Gabapentin;Bromazepam;Alprazolam;Metformin Hydrochloride;Insulin Glargine;Novorapid;Tramadol Hydrochloride;Mianserin Hydrochloride;Trulicity;Acetaminophen;Dapagliflozin;Ezetimibe\Rosuvastatin;Doxycycline	07-NOV-2023	20-NOV-2023	FR	Not Specified	FR-SIEMENS HEALTHCARE LIMITED-PET-000052-2023	-	-
448	22	23180738	-	Sodium Chloride;Fludeoxyglucose F-18	Flushing;Follicular Lymphoma	Pruritus;Rash	Serious	Other Outcomes	Female	24-OCT-2023	14-NOV-2023	Expedited	64 YR	54.88 KG	Siemens	Healthcare Professional	Not Specified	Thyroxine	02-NOV-2023	14-NOV-2023	GB	Not Specified	GB-SIEMENS HEALTHCARE LIMITED-PET-000051-2023	-	-
449	23	23176893	-	Fludeoxyglucose F-18;Obinutuzumab;Glofitamab	B-Cell Lymphoma;Cytokine Release Syndrome;Lymphoma;Oedema Peripheral	Anaemia	Serious	Hospitalized	Female	10-JAN-2023	14-NOV-2023	Expedited	79 YR	65.9 KG	Roche	Healthcare Professional	Not Specified	Acetaminophen;Spironolactone;Lactulose;Pantoprazole;Cyanocobalamin;Valacyclovir Hydrochloride;Glucagon;Ramipril;Magnesium;Prednisolone;Calcium\Vitamin D;Apixaban;Sulfamethoxazole\Trimethoprim;Carvedilol;Insulin Aspart;Metformin;Furosemide;Cetirizine;Allopurinol;Domperidone	11-NOV-2023	13-NOV-2023	Not Specified	Not Specified	DK-ROCHE-3263393	-	-
450	24	22996411	-	Glofitamab;Tocilizumab;Obinutuzumab;Fludeoxyglucose F-18	Blood Phosphorus Decreased;Constipation;Cytokine Release Syndrome;Depression;Diffuse Large B-Cell Lymphoma;Gout;Localised Infection;Lower Respiratory Tract Infection;Pain In Extremity;Pneumocystis Jirovecii Pneumonia;Tumour Haemorrhage	Infection;Covid-19	Serious	Hospitalized	Male	21-AUG-2023	14-NOV-2023	Expedited	39 YR	86.8 KG	Roche	Healthcare Professional	Not Specified	Sodium Chloride;Meropenem;Sodium Phosphate, Monobasic, Anhydrous;Lactulose;Granulocyte Colony-Stimulating Factor Nos;Morphine Sulfate;Cotrimoxazole;Tranexamic Acid;Acyclovir;Gabapentin;Allopurinol;Doxycycline;Methylprednisolone;Acetaminophen;Amoxicillin\Clavulanate Potassium;Sertraline;Polyethylene Glycol 3350\Potassium Chloride\Sodium Bicarbonate\Sodium Chloride;Chlorpheniramine Maleate	03-NOV-2023	28-SEP-2023	Not Specified	Not Specified	GB-ROCHE-3409788	-	-
451	25	23143581	-	Glofitamab;Fludeoxyglucose F-18;Obinutuzumab	B-Cell Lymphoma;Infection;Vitamin D Deficiency	Arthritis Infective	Serious	Hospitalized	Male	22-DEC-2022	03-NOV-2023	Expedited	Not Specified	75.8 KG	Roche	Healthcare Professional	Not Specified	Dapsone;Valacyclovir;Dexamethasone;Diphenhydramine;Cholecalciferol;Allopurinol;Acetaminophen;Levothyroxine;Famotidine;Pregabalin;Fluconazole;Hydrocortisone	31-OCT-2023	03-NOV-2023	Not Specified	Not Specified	US-ROCHE-3252661	-	-
452	26	22715048	-	Glofitamab;Tocilizumab;Fludeoxyglucose F-18;Obinutuzumab	Analgesic Therapy;Asthma;B-Cell Lymphoma;Constipation;Cytokine Release Syndrome;Gastrointestinal Disorder Prophylaxis;Nausea;Prophylaxis	Amylase Increased	Serious	Hospitalized	Male	06-SEP-2022	03-NOV-2023	Expedited	66 YR	59.7 KG	Roche	Healthcare Professional	Not Specified	Domperidone;Acetaminophen;Dexamethasone;Metoclopramide;Morphine;Albuterol;Atorvastatin;Magnesium Salicylate;Allopurinol;Lansoprazole;Fluticasone Propionate\Formoterol Fumarate;Acyclovir;Ondansetron;Azithromycin;Docusate Sodium	27-OCT-2023	18-JUL-2023	Not Specified	Not Specified	GB-ROCHE-3179667	-	-
453	27	21283173	Innohep;Ultravist	Iopromide;Tinzaparin Sodium;Fludeoxyglucose F-18	Computerised Tomogram Head;Positron Emission Tomogram;Thrombosis Prophylaxis	Rash Erythematous;Eosinophilia;Hypereosinophilic Syndrome;Acute Kidney Injury	Serious	Other Outcomes	Female	03-APR-2022	06-OCT-2023	Expedited	74 YR	Not Specified	Bayer	Healthcare Professional	Not Specified	-	03-NOV-2022	01-SEP-2022	FR	Not Specified	FR-BAYER-2022A122064	-	-
454	28	20697569	-	Glofitamab;Tocilizumab;Fludeoxyglucose F-18;Obinutuzumab	B-Cell Lymphoma;C-Reactive Protein Increased;Candida Infection;Conjunctivitis;Eye Infection;Gastrooesophageal Reflux Disease;Hypokalaemia;Mucosal Inflammation;Oedema Peripheral;Pneumonia;Prophylaxis;Rash;Vomiting	Pneumocystis Jirovecii Pneumonia	Serious	Died;Hospitalized	Female	10-MAR-2022	28-SEP-2023	Expedited	Not Specified	50.7 KG	Roche	Healthcare Professional	Not Specified	Ondansetron;Tobramycin Sulfate;Metoclopramide;Amoxicillin;Amoxicillin\Clavulanate Potassium;Prednisolone;Potassium Chloride;Azithromycin;Ciprofloxacin;Furosemide;Fluconazole;Tenofovir Disoproxil;Pantoprazole;Cetirizine;Fexofenadine;Posaconazole;Fenoterol\Ipratropium;Pantoprazole Sodium;Bimatoprost\Timolol;Calcium;Dexamethasone;Sulfamethoxazole\Trimethoprim;Levofloxacin	25-SEP-2023	11-APR-2022	Not Specified	Not Specified	DK-ROCHE-3052791	-	-
455	29	22936023	-	Glofitamab;Fludeoxyglucose F-18;Investigational Product;Obinutuzumab	Anxiety;Atrial Fibrillation;B-Cell Lymphoma;Blood Cholesterol Increased;Constipation;Depression;Insomnia;Oral Pain;Osteoporosis;Pain;Rhinorrhoea;Tremor	Pyrexia	Serious	Hospitalized	Female	03-SEP-2023	27-SEP-2023	Expedited	Not Specified	58.3 KG	Roche	Healthcare Professional	Not Specified	Tramadol;Calcium;Miralax;Oxycodone;Senna;Propranolol;Sulfamethoxazole\Trimethoprim;Melatonin;Sodium Chloride;Zilactin-B;Apixaban;Loratadine;Escitalopram Oxalate;Rosuvastatin;Acyclovir;Lorazepam	21-SEP-2023	12-SEP-2023	Not Specified	Not Specified	US-ROCHE-3417308	-	-
456	30	22828613	Illuccix	Gallium Ga-68 Gozetotide;Fludeoxyglucose F-18;Pembrolizumab	Product Used For Unknown Indication	Uveitis	Serious	Other Outcomes	Male	-	16-AUG-2023	Expedited	71 YR	Not Specified	Pharmalex	Consumer	Not Specified	Metoclopramide;Ibuprofen;Simethicone (Dimethicone);Sodium Chloride;Potassium Chloride;Magnesium Aspartate;Dexamethasone;Ondansetron;Acetaminophen;Pantoprazole;Loratadine;Temazepam	01-AUG-2023	16-AUG-2023	AU	Not Specified	AU-PharmaLex India-2144865	-	-
457	31	22395421	-	Glofitamab;Fludeoxyglucose F-18;Obinutuzumab	Abdominal Wall Haematoma;Candida Infection;Covid-19 Pneumonia;Diffuse Large B-Cell Lymphoma;Dyspepsia;Hypertension;Prophylaxis;Viral Infection	Cytokine Release Syndrome	Serious	Hospitalized	Male	24-MAY-2023	26-JUL-2023	Expedited	Not Specified	137.2 KG	Roche	Healthcare Professional	Not Specified	Gabapentin;Famotidine;Sodium Chloride;Lisinopril;Fluconazole;Methylprednisolone;Allopurinol;Diphenhydramine;Dexamethasone;Hydrochlorothiazide;Valacyclovir;Docusate Sodium;Acetaminophen;Acyclovir;Cholecalciferol;Remdesivir;Pantoprazole;Albuterol;Clotrimazole;Bactrim;Sulfamethoxazole;Triamcinolone;Lovenox;Oxygen;Cefepime	22-JUL-2023	01-JUN-2023	Not Specified	Not Specified	US-ROCHE-3358276	-	-
458	32	22741943	Iomeron	Iomeprol;Enalapril Maleate;Furosemide;Fludeoxyglucose F-18	Computerised Tomogram;Hypertension	Generalised Tonic-Clonic Seizure;Confusional State	Serious	Life Threatening	Male	06-JUN-2023	24-JUL-2023	Expedited	63 YR	84 KG	Accord	Healthcare Professional	Not Specified	Kardegic;Atorvastatin;Lercanidipine Hydrochloride	13-JUL-2023	24-JUL-2023	FR	Not Specified	FR-Accord-368321	-	-
459	33	22683089	Iomeron	Enalapril Maleate;Iomeprol;Fludeoxyglucose F-18;Furosemide	Computerised Tomogram;Hypertension;Product Used For Unknown Indication	Confusional State;Generalised Tonic-Clonic Seizure	Serious	Life Threatening	Male	06-JUN-2023	07-JUL-2023	Expedited	63 YR	84 KG	Teva	Healthcare Professional	Not Specified	Kardegic;Lercanidipine Hydrochloride;Atorvastatin	28-JUN-2023	07-JUL-2023	FR	Not Specified	FR-TEVA-2023-FR-2903467	-	-
460	34	22664569	Iomeron	Iomeprol;Furosemide;Fludeoxyglucose F-18;Enalapril	Computerised Tomogram;Hypertension;Product Used For Unknown Indication	Generalised Tonic-Clonic Seizure;Confusional State	Serious	Life Threatening;Other Outcomes	Male	06-JUN-2023	03-JUL-2023	Expedited	63 YR	84 KG	Aurobindo	Healthcare Professional	Not Specified	Lercanidipine;Kardegic;Atorvastatin	21-JUN-2023	03-JUL-2023	FR	Not Specified	FR-AUROBINDO-AUR-APL-2023-044362	-	-
461	35	22648231	-	Glofitamab;Obinutuzumab;Tocilizumab;Fludeoxyglucose F-18	Asthma;B-Cell Lymphoma;Constipation;Constipation Prophylaxis;Cytokine Release Syndrome;Deep Vein Thrombosis;Gastrooesophageal Reflux Disease;Haemorrhage;Infection Prophylaxis;Insomnia;Nausea;Neutropenia;Prophylaxis;Tumour Pain	Haemorrhage	Serious	Hospitalized	Male	23-OCT-2022	28-JUN-2023	Expedited	Not Specified	75.6 KG	Roche	Healthcare Professional	Not Specified	Metoclopramide;Formoterol;Zopiclone;Sodium Picosulfate;Meperidine;Pantoprazole;Tramadol;Fexofenadine;Budesonide;Acyclovir;Dexamethasone;Acetaminophen;Methylprednisolone;Xarelto;Terbutaline;Sodium Chloride;Pegfilgrastim;Rasburicase;Allopurinol;Cetirizine	27-JUN-2023	28-JUN-2023	Not Specified	Not Specified	DK-ROCHE-3207637	-	-
462	36	22611109	-	Fludeoxyglucose F-18;Tocilizumab;Obinutuzumab;Glofitamab	B-Cell Lymphoma;Cytomegalovirus Infection Reactivation;Hyperuricaemia	Death	Serious	Died	Male	04-APR-2023	26-JUN-2023	Expedited	Not Specified	75 KG	Roche	Healthcare Professional	Not Specified	Bactrim;Acyclovir;Omeprazole;Erythropoietin;Febuxostat;Valganciclovir	20-JUN-2023	16-JUN-2023	Not Specified	Not Specified	IT-ROCHE-3367618	-	-
463	37	22634754	Iomeron	Iomeprol;Enalapril Maleate;Furosemide;Fludeoxyglucose F-18	Computerised Tomogram;Hypertension;Product Used For Unknown Indication	Generalised Tonic-Clonic Seizure;Confusional State	Serious	Life Threatening	Male	06-JUN-2023	23-JUN-2023	Expedited	63 YR	84 KG	Novartis	Healthcare Professional	Not Specified	Atorvastatin;Kardegic;Lercanidipine Hydrochloride	23-JUN-2023	23-JUN-2023	FR	Not Specified	NVSC2023FR143483	-	-
464	38	22192589	-	Fludeoxyglucose F-18;Glofitamab;Obinutuzumab	B-Cell Lymphoma;Premedication	Cytokine Release Syndrome	Serious	Hospitalized	Female	28-MAR-2023	30-MAY-2023	Expedited	Not Specified	76 KG	Roche	Healthcare Professional	Not Specified	Solu-Medrol;Acetaminophen;Polaramine;Dexamethasone	25-MAY-2023	10-APR-2023	Not Specified	Not Specified	FR-ROCHE-3321260	-	-
465	39	22306449	-	Fludeoxyglucose F-18	Positron Emission Tomogram	Positron Emission Tomogram Abnormal	Non-Serious	Non-Serious	Female	-	11-MAY-2023	Non-Expedited	16 YR	Not Specified	Siemens	Healthcare Professional	Not Specified	-	27-MAY-2022	11-MAY-2023	US	Not Specified	US-SIEMENS HEALTHCARE LIMITED-PET-000018-2022	Sharma A Drachtman R Capozzoli G.Abnormal PET scan result after recent COVID vaccination.Pediatric Blood & Cancer.2021;68 (12):1-2	-
466	40	22613057	Pylarify	Piflufolastat F-18;Fludeoxyglucose F-18	Scan	Product Preparation Error;Wrong Product Administered	Non-Serious	Non-Serious	Male	27-MAR-2023	18-JUN-2023	Non-Expedited	Not Specified	Not Specified	Progenics Pharmaceuticals	Consumer	Not Specified	-	28-MAR-2023	18-JUN-2023	US	Not Specified	US-LANTHEUS-LMI-2023-00389	-	-
467	41	22613056	Pylarify	Piflufolastat F-18;Fludeoxyglucose F-18	Scan	Wrong Product Administered;Product Preparation Error	Non-Serious	Non-Serious	Male	27-MAR-2023	18-JUN-2023	Non-Expedited	Not Specified	Not Specified	Progenics Pharmaceuticals	Consumer	Not Specified	-	28-MAR-2023	18-JUN-2023	US	Not Specified	US-LANTHEUS-LMI-2023-00382	-	-
468	42	22306447	Pfizer-Biontech Covid-19 Vaccine	Tozinameran;Fludeoxyglucose F-18	Covid-19 Immunisation;Positron Emission Tomogram	Positron Emission Tomogram Abnormal	Non-Serious	Non-Serious	Female	-	11-MAY-2023	Non-Expedited	48 YR	Not Specified	Siemens	Healthcare Professional	Not Specified	-	10-APR-2022	11-MAY-2023	GB	Not Specified	GB-SIEMENS HEALTHCARE LIMITED-PET-000014-2022	Nawwar AA Searle J Lyburn ID.Bilateral Avid Axillary Nodes on FDG PET/CT Due to Concurrent Booster COVID-19 Immunization and Seasonal Influenza Vaccination.Clinical Nuclear Medicine.2022;1-2	-
469	43	22306440	-	Fludeoxyglucose F-18	Dyslipidaemia;Hepatic Echinococciasis;Positron Emission Tomogram	Bladder Dilatation;Rash	Non-Serious	Non-Serious	Female	MAR-2022	11-MAY-2023	Non-Expedited	75 YR	65 KG	Siemens	Healthcare Professional	Not Specified	Albendazole	27-AUG-2022	11-MAY-2023	FR	Not Specified	FR-SIEMENS HEALTHCARE LIMITED-PET-000032-2022	-	-
470	44	22306431	-	Fludeoxyglucose F-18	Positron Emission Tomogram;Product Used For Unknown Indication	Urticaria	Non-Serious	Non-Serious	Male	10-JAN-2023	11-MAY-2023	Non-Expedited	64 YR	84 KG	Siemens	Healthcare Professional	Not Specified	Warfarin Sodium;Bisoprolol Fumarate;Irbesartan	24-FEB-2023	11-MAY-2023	FR	Not Specified	FR-SIEMENS HEALTHCARE LIMITED-PET-000009-2023	-	-
471	45	22306345	Visipaque	Iodixanol;Fludeoxyglucose F-18	Computerised Tomogram Thorax;Positron Emission Tomogram	Rash Erythematous	Non-Serious	Non-Serious	Female	11-AUG-2022	11-MAY-2023	Non-Expedited	Not Specified	Not Specified	Siemens	Healthcare Professional	Not Specified	-	22-AUG-2022	11-MAY-2023	GB	Not Specified	GB-SIEMENS HEALTHCARE LIMITED-PET-000031-2022	-	-
472	46	22306116	Covid-19 Vaccine Nos	Covid-19 Vaccine;Fludeoxyglucose F-18	Covid-19 Immunisation;Positron Emission Tomogram	False Positive Investigation Result	Non-Serious	Non-Serious	Female	-	11-MAY-2023	Non-Expedited	65 YR	Not Specified	Siemens	Healthcare Professional	Not Specified	-	25-SEP-2022	11-MAY-2023	US	Not Specified	US-SIEMENS HEALTHCARE LIMITED-PET-000039-2022	Nassar M Soubani A.Increased FluoroDeoxyGlucose (FDG) Avidity Following COVID-19 Vaccination.Advances in Respiratory Medicine.2022;90(5):376-377	-
473	47	22306114	-	Magnesium Pidolate;Amoxicillin;Fludeoxyglucose F-18;Ceftriaxone;Ioversol	Hypomagnesaemia;Infection;Positron Emission Tomogram;Prophylaxis	Rash Maculo-Papular	Non-Serious	Non-Serious	Male	19-OCT-2022	11-MAY-2023	Non-Expedited	64 YR	Not Specified	Siemens	Healthcare Professional	Not Specified	Lovenox	07-DEC-2022	11-MAY-2023	FR	Not Specified	FR-SIEMENS HEALTHCARE LIMITED-PET-000045-2022	-	-
474	48	22278188	-	Obinutuzumab;Fludeoxyglucose F-18	B-Cell Lymphoma;Premedication	Hyperuricaemia;Blood Creatinine Increased;Hypercalcaemia	Serious	Hospitalized	Male	03-APR-2023	03-MAY-2023	Expedited	Not Specified	74 KG	Roche	Healthcare Professional	Not Specified	Dexamethasone;Chlorpheniramine Maleate;Acetaminophen	21-APR-2023	03-MAY-2023	Not Specified	Not Specified	IT-ROCHE-3324335	-	-
475	49	21809730	-	Fludeoxyglucose F-18	Breast Cancer;Positron Emission Tomogram	Rash Pruritic	Serious	Other Outcomes	Female	19-NOV-2021	07-MAR-2023	Expedited	61 YR	57 KG	Siemens	Healthcare Professional	Not Specified	Docetaxel;Pertuzumab;Rabeprazole Sodium;Apixaban;Trastuzumab;Aceclofenac;Acetaminophen\Tramadol Hydrochloride	22-FEB-2023	03-JAN-2023	FR	Not Specified	FR-SIEMENS HEALTHCARE LIMITED-PET-000029-2022	-	-
476	50	21466413	-	Fludeoxyglucose F-18;Glofitamab;Obinutuzumab	Adrenal Insufficiency;B-Cell Lymphoma Stage Iv;Fanconi Syndrome;Gastrooesophageal Reflux Disease;Infection;Infection Prophylaxis;Nausea;Osteoarthritis;Vascular Access Site Pain	Hypertransaminasaemia	Serious	Hospitalized	Female	09-SEP-2022	28-FEB-2023	Expedited	Not Specified	88.9 KG	Roche	Healthcare Professional	Not Specified	Hydrocortisone;Fludrocortisone;Potassium Chloride;Tramadol;Keppra;Allopurinol;Prochlorperazine;Magnesium Oxide;Acyclovir;Ondansetron;Lidocaine\Prilocaine;Pantoprazole;Dapsone	16-FEB-2023	17-OCT-2022	Not Specified	Not Specified	US-ROCHE-3178425	-	-
477	51	21943708	-	Fludeoxyglucose F-18	-	Death	Serious	Died;Hospitalized	Female	29-NOV-2022	01-FEB-2023	Direct	Not Specified	92.2 KG	Fda-Ctu	Not Specified	Not Specified	-	-	01-FEB-2023	Not Specified	Not Specified	-	-	-
478	52	21586482	-	Obinutuzumab;Glofitamab;Fludeoxyglucose F-18	B-Cell Lymphoma;Hypertension;Hypomagnesaemia	Covid-19 Pneumonia	Serious	Hospitalized	Female	02-NOV-2022	05-JAN-2023	Expedited	Not Specified	70 KG	Roche	Healthcare Professional	Not Specified	Acyclovir;Lamivudine;Bisoprolol;Sulfamethoxazole;Omeprazole;Bactrim;Magnesium Pidolate;Filgrastim	29-DEC-2022	12-NOV-2022	Not Specified	Not Specified	IT-ROCHE-3213377	-	-
479	53	21670069	-	Fludeoxyglucose F-18	Positron Emission Tomogram	Off Label Use;Drug Ineffective	Non-Serious	Non-Serious	Male	23-MAY-2022	01-DEC-2022	Non-Expedited	Not Specified	Not Specified	Cardinal Health	Healthcare Professional	Not Specified	Insulin Nos;Dextrose	14-JUL-2022	01-DEC-2022	US	Not Specified	US-Cardinal Health 414-NPHS-AE-22-16	-	-
480	54	21670068	-	Fludeoxyglucose F-18	Positron Emission Tomogram	Off Label Use;Drug Ineffective	Non-Serious	Non-Serious	Male	11-JUL-2022	01-DEC-2022	Non-Expedited	Not Specified	Not Specified	Cardinal Health	Healthcare Professional	Not Specified	Glyburide\Metformin	14-JUL-2022	01-DEC-2022	US	Not Specified	US-Cardinal Health 414-NPHS-AE-22-18	-	-
481	55	21422685	-	Fludeoxyglucose F-18	Imaging Procedure	Drug Ineffective;Wrong Product Administered;Product Label Issue;Product Label On Wrong Product	Non-Serious	Non-Serious	Not Specified	12-SEP-2022	06-OCT-2022	Direct	Not Specified	Not Specified	Fda-Ctu	Not Specified	Not Specified	-	-	06-OCT-2022	Not Specified	Y	-	-	-
482	56	21422684	-	Fludeoxyglucose F-18	Imaging Procedure	Manufacturing Process Control Procedure Issue;Product Sterility Issue;Product Label Issue;Drug Ineffective;Wrong Product Administered;Product Label On Wrong Product	Non-Serious	Non-Serious	Male	12-SEP-2022	06-OCT-2022	Direct	Not Specified	Not Specified	Fda-Ctu	Not Specified	Not Specified	-	-	06-OCT-2022	Not Specified	Y	-	-	-
483	57	21422640	-	Fludeoxyglucose F-18	Neoplasm;Positron Emission Tomogram	Drug Ineffective;Product Label On Wrong Product;Wrong Product Administered	Non-Serious	Non-Serious	Male	12-SEP-2022	06-OCT-2022	Direct	Not Specified	Not Specified	Fda-Ctu	Not Specified	Not Specified	-	-	06-OCT-2022	Not Specified	Y	-	-	-
484	58	21422580	-	Fludeoxyglucose F-18	Imaging Procedure	Wrong Product Administered;Drug Ineffective;Manufacturing Process Control Procedure Issue;Product Label Issue;Product Label On Wrong Product;Product Sterility Issue	Non-Serious	Non-Serious	Not Specified	12-SEP-2022	06-OCT-2022	Direct	Not Specified	Not Specified	Fda-Ctu	Not Specified	Not Specified	-	-	06-OCT-2022	Not Specified	Y	-	-	-
485	59	21422537	-	Fludeoxyglucose F-18	Imaging Procedure	Drug Ineffective;Product Sterility Issue;Wrong Product Administered;Product Label Issue;Manufacturing Process Control Procedure Issue;Product Label On Wrong Product	Non-Serious	Non-Serious	Not Specified	12-SEP-2022	06-OCT-2022	Direct	Not Specified	Not Specified	Fda-Ctu	Not Specified	Not Specified	-	-	06-OCT-2022	Not Specified	Y	-	-	-
486	60	21422521	-	Fludeoxyglucose F-18	Imaging Procedure	Occupational Problem Environmental;Wrong Product Administered;Product Label Issue;Product Label On Wrong Product;Drug Ineffective;Manufacturing Process Control Procedure Issue	Non-Serious	Non-Serious	Female	12-SEP-2022	06-OCT-2022	Direct	Not Specified	Not Specified	Fda-Ctu	Not Specified	Not Specified	-	-	06-OCT-2022	Not Specified	Y	-	-	-
487	61	21422476	-	Fludeoxyglucose F-18	Imaging Procedure;Neoplasm	Wrong Product Administered;Product Label On Wrong Product;Drug Ineffective	Non-Serious	Non-Serious	Not Specified	12-SEP-2022	06-OCT-2022	Direct	Not Specified	Not Specified	Fda-Ctu	Not Specified	Not Specified	-	-	06-OCT-2022	Not Specified	Y	-	-	-
488	62	21391007	-	Fludeoxyglucose F-18	Imaging Procedure	Product Label On Wrong Product;Product Monitoring Error;Drug Ineffective;Wrong Product Administered	Non-Serious	Non-Serious	Not Specified	12-SEP-2022	27-SEP-2022	Direct	Not Specified	Not Specified	Fda-Ctu	Not Specified	Not Specified	-	-	27-SEP-2022	Not Specified	Y	-	-	-
489	63	21302661	-	Fludeoxyglucose F-18	-	Product Preparation Error	Non-Serious	Non-Serious	Not Specified	-	07-SEP-2022	Direct	Not Specified	Not Specified	Fda-Ctu	Healthcare Professional	Not Specified	-	-	07-SEP-2022	Not Specified	Not Specified	-	-	-
490	64	21284353	Ultravist;Innohep	Tinzaparin Sodium;Iopromide;Fludeoxyglucose F-18	Computerised Tomogram Head;Positron Emission Tomogram;Thrombosis Prophylaxis	Rash Erythematous;Eosinophilia;Acute Kidney Injury	Serious	Other Outcomes	Female	03-APR-2022	02-SEP-2022	Expedited	74 YR	Not Specified	Petnet	Healthcare Professional	Not Specified	-	24-AUG-2022	02-SEP-2022	FR	Not Specified	FR-SIEMENS HEALTHCARE LIMITED-PET-000030-2022	-	-
491	65	21232329	-	Fludeoxyglucose F-18	-	Flushing;Documented Hypersensitivity To Administered Product;Chest Discomfort;Consciousness Fluctuating;Dyspnoea;Hyperhidrosis;Vision Blurred;Disorientation;Incorrect Drug Administration Rate;Hypopnoea	Serious	Hospitalized;Life Threatening	Female	05-AUG-2022	19-AUG-2022	Direct	52 YR	87.75 KG	Fda-Ctu	Consumer	Not Specified	Rosuvastatin;Oxybutynin;Euthyrox;Pantoprazole Sodium;Losartan;Famotidine	-	19-AUG-2022	Not Specified	Not Specified	-	-	-
492	66	21081156	-	Fludeoxyglucose F-18	Analgesic Therapy;Asthma;Blood Cholesterol Increased;Constipation;Cytokine Release Syndrome;Hyperuricaemia;Nausea;Non-Hodgkin's Lymphoma	Hypercalcaemia	Serious	Hospitalized	Male	14-JUN-2022	28-JUL-2022	Expedited	66 YR	63.2 KG	Roche	Healthcare Professional	Not Specified	Magnesium Salicylate;Lactulose;Dexamethasone;Albuterol;Cyclizine;Fluticasone;Atorvastatin;Morphine;Azithromycin;Lansoprazole;Allopurinol;Docusate Sodium;Ondansetron;Fluticasone Propionate\Formoterol Fumarate;Acetaminophen;Tocilizumab;Acyclovir	02-JUL-2022	14-JUL-2022	Not Specified	Not Specified	GB-ROCHE-3119983	-	-
493	67	21103144	Bactrim	Sulfamethoxazole\Trimethoprim;Fludeoxyglucose F-18;Cefotaxime Sodium;Ioversol;Filgrastim	Infection;Neutropenia;Positron Emission Tomogram;Product Used For Unknown Indication	Rash Maculo-Papular	Serious	Hospitalized	Female	05-JUL-2021	20-JUL-2022	Expedited	48 YR	Not Specified	Petnet	Healthcare Professional	Not Specified	-	06-JUL-2022	20-JUL-2022	FR	Not Specified	FR-SIEMENS HEALTHCARE LIMITED-PET-000020-2022	-	-
494	68	20918549	Iomeron	Iomeprol;Fludeoxyglucose F-18	Positron Emission Tomogram	Hypertension;Tachycardia;Tremor	Serious	Other Outcomes	Male	16-MAR-2022	22-JUN-2022	Expedited	70 YR	83 KG	Petnet	Healthcare Professional	Not Specified	-	08-JUN-2022	06-JUN-2022	FR	Not Specified	FR-SIEMENS HEALTHCARE LIMITED-PET-000013-2022	-	-
495	69	20771365	-	Obinutuzumab;Glofitamab;Fludeoxyglucose F-18;Tocilizumab	B-Cell Lymphoma Refractory;Benign Prostatic Hyperplasia;Cytokine Release Syndrome;Hypertension;Hypothyroidism;Insomnia;Oedema;Prophylaxis;Tumour Flare;Tumour Lysis Syndrome;Urethral Pain;Urinary Tract Infection	Covid-19	Serious	Hospitalized	Male	09-MAR-2022	09-JUN-2022	Expedited	Not Specified	100 KG	Roche	Healthcare Professional	Not Specified	Chlorpheniramine Maleate;Valganciclovir Hydrochloride;Ibuprofen;Rasburicase;Dexamethasone;Metoclopramide Hydrochloride;Tocilizumab;Morphine;Pantoprazole;Avodart;Sodium Chloride;Bactrim;Febuxostat;Levothyroxine;Levetiracetam;Fentanyl;Cholecalciferol;Potassium;Omeprazole;Acetaminophen;Dextrose;Gabapentin;Spironolactone;Tramadol;Piperacillin Sodium\Tazobactam Sodium;Tamsulosin Hydrochloride;Xanax;Fu…	31-MAY-2022	29-APR-2022	Not Specified	Not Specified	IT-ROCHE-3049266	-	-
496	70	20842777	-	Glofitamab;Tocilizumab;Obinutuzumab;Fludeoxyglucose F-18	B-Cell Lymphoma Refractory;Cytokine Release Syndrome;Diabetes Mellitus;Dyslipidaemia;Hypertension;Prophylaxis;Thrombocytopenia	Covid-19	Serious	Hospitalized	Female	25-FEB-2022	23-MAY-2022	Expedited	53 YR	70 KG	Roche	Healthcare Professional	Not Specified	Ibuprofen;Fluoxetine Hydrochloride;Acetaminophen;Insulin Nos;Cannabis Sativa Subsp. Indica Top;Rivotril;Sodium Chloride;Dexamethasone;Bactrim;Bisoprolol;Chlorpheniramine Maleate;Pantoprazole Sodium;Fenofibrate;Fentanyl;Pecfent;Acyclovir;Ezetimibe;Platelets;Rasburicase	17-MAY-2022	18-MAY-2022	Not Specified	Not Specified	IT-ROCHE-3039092	-	-
497	71	20845574	Omnipaque	Iohexol;Fludeoxyglucose F-18	Hydronephrosis;Lung Cancer Metastatic;Metastases To Bone;Metastases To Liver;Positron Emission Tomogram;Product Used For Unknown Indication;Scan With Contrast	Anuria;Organ Failure;Malaise;Pulmonary Oedema;Pulmonary Congestion;Acute Kidney Injury	Serious	Other Outcomes;Hospitalized;Died	Male	MAY-2022	18-MAY-2022	Expedited	81 YR	96 KG	Ge Healthcare	Healthcare Professional	Not Specified	Morphine;Diazepam	16-MAY-2022	18-MAY-2022	DK	Not Specified	DK-GE HEALTHCARE-2022CSU003260	-	-
498	72	20353464	-	Obinutuzumab;Fludeoxyglucose F-18;Glofitamab	B-Cell Lymphoma	Squamous Cell Carcinoma Of The Tongue	Serious	Life Threatening	Female	17-DEC-2021	11-MAY-2022	Expedited	Not Specified	61 KG	Roche	Healthcare Professional	Not Specified	Methylprednisolone;Fasturtec;Acetaminophen;Polaramine;Bactrim;Leucovorin Calcium;Valacyclovir Hydrochloride	09-MAY-2022	19-JAN-2022	Not Specified	Not Specified	FR-ROCHE-3003436	-	-
499	73	20809534	-	Fludeoxyglucose F-18	Product Used For Unknown Indication	Hypersensitivity;Erythema	Non-Serious	Non-Serious	Female	-	10-MAY-2022	Non-Expedited	72 YR	Not Specified	Petnet	Healthcare Professional	Not Specified	-	22-DEC-2021	10-MAY-2022	US	Not Specified	US-SIEMENS HEALTHCARE LIMITED-PET-000079-2021	-	-
500	74	20809530	-	Fludeoxyglucose F-18	Breast Cancer;Positron Emission Tomogram	Positron Emission Tomogram Abnormal	Non-Serious	Non-Serious	Female	14-APR-2021	10-MAY-2022	Non-Expedited	53 YR	Not Specified	Petnet	Healthcare Professional	Not Specified	-	14-APR-2021	10-MAY-2022	US	Not Specified	US-SIEMENS HEALTHCARE LIMITED-PET-000046-2021	-	-
501	75	20809441	-	Fludeoxyglucose F-18	Product Used For Unknown Indication;Pulmonary Imaging Procedure	Pruritus;Urticaria	Non-Serious	Non-Serious	Female	-	10-MAY-2022	Non-Expedited	Not Specified	Not Specified	Petnet	Healthcare Professional	Not Specified	Zinc;Hydrocortisone;Benadryl;Losartan;Amlodipine;Lorazepam	21-OCT-2021	10-MAY-2022	US	Not Specified	US-SIEMENS HEALTHCARE LIMITED-PET-000078-2021	-	-
502	76	20142870	-	Obinutuzumab;Glofitamab;Fludeoxyglucose F-18	B-Cell Lymphoma;B-Cell Lymphoma Refractory;Hypertension	Cytokine Release Syndrome	Serious	Hospitalized	Male	21-NOV-2021	10-MAY-2022	Expedited	75 YR	89 KG	Roche	Healthcare Professional	Not Specified	Bisoprolol;Methylprednisolone;Avodart;Kardegic;Investigational Product;Esomeprazole;Polaramine;Acetaminophen;Innohep;Valacyclovir Hydrochloride;Leucovorin Calcium;Bactrim;Candesartan	29-APR-2022	02-DEC-2021	Not Specified	Not Specified	FR-ROCHE-2965348	-	-
503	77	20623163	-	Obinutuzumab;Fludeoxyglucose F-18;Glofitamab	B-Cell Lymphoma Refractory;Covid-19 Treatment;Cytokine Release Syndrome;Erectile Dysfunction;Pain;Tumour Flare;Tumour Pain	Cytokine Release Syndrome	Serious	Hospitalized	Male	09-MAR-2022	29-APR-2022	Expedited	Not Specified	91.4 KG	Roche	Healthcare Professional	Not Specified	Cetirizine Hydrochloride;Oxycontin;Methylprednisolone;Sodium Fluoride;Allopurinol;Prednisolone;Sodium Chloride;Potassium Chloride;Saline;Sotrovimab;Dexamethasone;Sildenafil;Clemastine;Acetaminophen	20-APR-2022	22-MAR-2022	Not Specified	Not Specified	DK-ROCHE-3050508	-	-
504	78	20730790	-	Fludeoxyglucose F-18	X-Ray With Contrast	Product Measured Potency Issue	Serious	Life Threatening	Male	15-FEB-2022	18-APR-2022	Direct	33 YR	99.79 KG	Fda-Ctu	Healthcare Professional	Not Specified	-	-	18-APR-2022	Not Specified	Y	-	-	Yes
505	79	20638358	-	Fludeoxyglucose F-18;Obinutuzumab	B-Cell Lymphoma Refractory;Covid-19;Gastrooesophageal Reflux Disease;Hypertension;Premedication	Covid-19	Serious	Hospitalized	Male	14-MAR-2022	05-APR-2022	Expedited	68 YR	125 KG	Roche	Healthcare Professional	Not Specified	Acetaminophen;Lansoprazole;Methylprednisolone;Hydrochlorothiazide\Irbesartan;Bactrim;Valacyclovir Hydrochloride;Dexchlorpheniramine	29-MAR-2022	25-MAR-2022	Not Specified	Not Specified	FR-ROCHE-3053557	-	-
506	80	19634437	-	Glofitamab;Obinutuzumab;Fludeoxyglucose F-18	B-Cell Lymphoma Refractory;Blood Iron Decreased;Deep Vein Thrombosis;Hypertension;Hypothyroidism;Lung Consolidation;Nausea;Pneumocystis Jirovecii Pneumonia;Pyrexia;Tumour Pain;Vascular Device Infection;Vomiting;Wound Infection	Vomiting;Diarrhoea	Serious	Hospitalized	Female	21-JUL-2021	14-JAN-2022	Expedited	78 YR	81.8 KG	Roche	Healthcare Professional	Not Specified	Cocodamol;Piperacillin Sodium\Tazobactam Sodium;Dihydrocodeine;Chlorpheniramine Maleate;Pentamidine;Cotrimoxazole;Amoxicillin\Clavulanate Potassium;Levothyroxine;Acetaminophen;Ramipril;Dexamethasone;Bendroflumethiazide;Apixaban;Acyclovir;Albuterol;Ferrous Sulfate;Metoclopramide	05-JAN-2022	30-JUL-2021	Not Specified	Not Specified	GB-ROCHE-2876743	-	-
507	81	20082836	-	Fludeoxyglucose F-18	Positron Emission Tomogram	Off Label Use;Hyperventilation;Loss Of Consciousness;Cold Sweat	Non-Serious	Non-Serious	Male	07-JUL-2021	17-NOV-2021	Non-Expedited	Not Specified	Not Specified	Cardinal Health	Healthcare Professional	Not Specified	-	07-JUL-2021	17-NOV-2021	US	Not Specified	US-Cardinal Health 414-NPHS-AE-21-8	-	-
508	82	20082835	-	Fludeoxyglucose F-18	Positron Emission Tomogram	Nausea	Non-Serious	Non-Serious	Female	20-OCT-2021	17-NOV-2021	Non-Expedited	60 YR	Not Specified	Cardinal Health	Healthcare Professional	Not Specified	-	20-OCT-2021	17-NOV-2021	US	Not Specified	US-Cardinal Health 414-NPHS-AE-21-20	-	-
509	83	19908235	-	Glofitamab;Obinutuzumab;Fludeoxyglucose F-18	B-Cell Lymphoma Refractory;Gout;Herpes Virus Infection;Infection;Neutropenia;Pain;Pleural Effusion;Pneumonia	Cytokine Release Syndrome	Serious	Hospitalized	Male	23-SEP-2021	07-OCT-2021	Expedited	37 YR	97.2 KG	Roche	Healthcare Professional	Not Specified	Oxycodone;Oxycodone Hydrochloride;Valacyclovir Hydrochloride;Acetaminophen;Pantoprazole Sodium;Cetirizine Hydrochloride;Sulfamethoxazole\Trimethoprim;Dexamethasone;Filgrastim;Allopurinol;Solu-Medrol;Moxifloxacin	29-SEP-2021	01-OCT-2021	DK	Not Specified	DK-ROCHE-2921397	-	-
510	84	19295021	-	Fludeoxyglucose F-18	Product Used For Unknown Indication;Scan	Malaise;Swollen Tongue;Mouth Swelling;Hypotension;Pruritus;Anaphylactic Shock	Serious	Other Outcomes;Hospitalized	Female	28-JUN-2018	24-MAY-2021	Expedited	69 YR	45 KG	Petnet	Healthcare Professional	Not Specified	Saline	29-JUN-2018	24-MAY-2021	FR	Not Specified	FR-SIEMENS HEALTHCARE LIMITED-PET-001106-2018	-	-
511	85	19295008	-	Fludeoxyglucose F-18	Product Used For Unknown Indication	Rash Erythematous;Pruritus	Non-Serious	Non-Serious	Female	23-NOV-2020	24-MAY-2021	Non-Expedited	81 YR	53.6 KG	Petnet	Healthcare Professional	Not Specified	-	15-DEC-2020	24-MAY-2021	GB	Not Specified	NL-SIEMENS HEALTHCARE LIMITED-PET-000136-2020	-	-
512	86	19294998	-	Fludeoxyglucose F-18	Adenocarcinoma;Ill-Defined Disorder	Rash	Non-Serious	Non-Serious	Male	21-OCT-2020	24-MAY-2021	Non-Expedited	64 YR	97 KG	Petnet	Healthcare Professional	Not Specified	Doxazosin;Rivaroxaban;Amlodipine	23-OCT-2020	24-MAY-2021	GB	Not Specified	NL-SIEMENS HEALTHCARE LIMITED-PET-000110-2020	-	-
513	87	19294979	Iomeron	Iomeprol;Fludeoxyglucose F-18	Positron Emission Tomogram	Hypersensitivity	Serious	Other Outcomes	Male	13-AUG-2020	24-MAY-2021	Non-Expedited	55 YR	103 KG	Petnet	Healthcare Professional	Not Specified	-	24-AUG-2020	24-MAY-2021	FR	Not Specified	NL-SIEMENS HEALTHCARE LIMITED-PET-000089-2020	-	-
514	88	19294971	-	Fludeoxyglucose F-18	Product Used For Unknown Indication	Vomiting;Fatigue;Dyspnoea	Non-Serious	Non-Serious	Not Specified	-	24-MAY-2021	Non-Expedited	Not Specified	Not Specified	Petnet	Healthcare Professional	Not Specified	-	23-OCT-2020	24-MAY-2021	GB	Not Specified	GB-SIEMENS HEALTHCARE LIMITED-PET-000109-2020	-	-
515	89	19294959	-	Fludeoxyglucose F-18	Positron Emission Tomogram	Injection Site Extravasation;Localised Oedema	Non-Serious	Non-Serious	Female	20-APR-2020	24-MAY-2021	Non-Expedited	81 YR	59 KG	Petnet	Healthcare Professional	Not Specified	-	09-MAY-2020	24-MAY-2021	FR	Not Specified	NL-SIEMENS HEALTHCARE LIMITED-PET-000021-2020	-	-
516	90	19294941	-	Fludeoxyglucose F-18	Positron Emission Tomogram	Injection Site Extravasation	Non-Serious	Non-Serious	Female	29-AUG-2019	24-MAY-2021	Non-Expedited	39 YR	Not Specified	Petnet	Healthcare Professional	Not Specified	-	18-MAR-2020	24-MAY-2021	FR	Not Specified	NL-SIEMENS HEALTHCARE LIMITED-PET-000007-2020	-	-
517	91	18990654	-	Fludeoxyglucose F-18;Mirabegron	Hypertonic Bladder;Positron Emission Tomogram	Drug Interaction;Lymphoma;Positron Emission Tomogram Abnormal	Serious	Other Outcomes	Female	23-APR-2020	10-MAR-2021	Expedited	9 DEC	Not Specified	Astellas	Consumer	Not Specified	-	15-JAN-2021	10-MAR-2021	JP	Not Specified	JP-ASTELLAS-2021JP000651	-	-
518	92	18513822	-	Fludeoxyglucose F-18	Dementia	Taste Disorder;Ageusia;Nausea;Weight Decreased;Prurigo;Abdominal Discomfort;Gastrointestinal Pain;Insomnia;Off Label Use;Anosmia;Impetigo	Serious	Hospitalized	Male	17-JUL-2020	17-NOV-2020	Expedited	83 YR	78.18 KG	Cardinal Health	Healthcare Professional	Not Specified	-	21-JUL-2020	17-NOV-2020	US	Not Specified	US-CARDINAL HEALTH 414, LLC-2096040	-	-
519	93	18513730	-	Fludeoxyglucose F-18	Diagnostic Procedure	Malaise;Dizziness;Nausea;Hyperhidrosis	Non-Serious	Non-Serious	Female	24-JUL-2020	17-NOV-2020	Non-Expedited	71 YR	62.73 KG	Cardinal Health	Healthcare Professional	Not Specified	-	24-JUL-2020	17-NOV-2020	US	Not Specified	US-CARDINAL HEALTH 414, LLC-2096037	-	-
520	94	18513290	-	Fludeoxyglucose F-18	Diagnostic Procedure	Palpitations;Feeling Hot	Non-Serious	Non-Serious	Female	-	17-NOV-2020	Non-Expedited	71 YR	Not Specified	Cardinal Health	Consumer	Not Specified	-	26-JUN-2020	17-NOV-2020	US	Not Specified	US-CARDINAL HEALTH 414, LLC-2096032	-	-
521	95	18487068	-	Fludeoxyglucose F-18	Neoplasm Malignant	Drug Ineffective	Non-Serious	Non-Serious	Female	07-JAN-2020	10-NOV-2020	Non-Expedited	47 YR	52.27 KG	Cardinal Health	Healthcare Professional	Not Specified	-	07-JAN-2020	10-NOV-2020	US	Not Specified	US-CARDINAL HEALTH 414, LLC-2095770	-	-
522	96	17110364	Lutathera	Lutetium Oxodotreotide Lu-177;Fludeoxyglucose F-18;Octreotide	Neuroendocrine Tumour;Product Used For Unknown Indication	Neuroendocrine Tumour;Hyperproteinaemia;Metastases To Liver;Bone Lesion;Second Primary Malignancy;Plasma Cell Myeloma;Malignant Neoplasm Progression	Serious	Life Threatening;Other Outcomes	Male	NOV-2018	27-APR-2020	Expedited	63 YR	86 KG	Novartis	Healthcare Professional	Not Specified	Indapamide;Amlodipine;Olmesartan	24-APR-2020	04-DEC-2019	PT	Not Specified	NVSC2019PT052717	-	-
523	97	17544803	-	Fludeoxyglucose F-18	Product Used For Unknown Indication	Occupational Exposure To Radiation	Non-Serious	Non-Serious	Female	-	16-MAR-2020	Expedited	Not Specified	Not Specified	Lantheus Medical Imaging	Healthcare Professional	Not Specified	-	13-FEB-2019	16-MAR-2020	US	Not Specified	US-LANTHEUS-LMI-2019-00114	-	-
524	98	17544786	-	Fludeoxyglucose F-18	Product Used For Unknown Indication	Occupational Exposure To Radiation	Non-Serious	Non-Serious	Male	-	16-MAR-2020	Non-Expedited	Not Specified	Not Specified	Lantheus Medical Imaging	Healthcare Professional	Not Specified	-	13-FEB-2019	16-MAR-2020	US	Not Specified	US-LANTHEUS-LMI-2019-00106	-	-
525	99	17391153	Lutathera	Lutetium Oxodotreotide Lu-177;Fludeoxyglucose F-18;Octreotide	Neuroendocrine Tumour;Product Used For Unknown Indication	Hyperproteinaemia;Plasma Cell Myeloma;Metastases To Liver;Bone Lesion;Second Primary Malignancy;Malignant Neoplasm Progression;Neuroendocrine Tumour	Serious	Other Outcomes;Life Threatening	Male	NOV-2018	07-FEB-2020	Expedited	63 YR	86 KG	Teva	Healthcare Professional	Not Specified	Indapamide;Amlodipine;Olmesartan	04-FEB-2020	07-FEB-2020	PT	Not Specified	PT-TEVA-2020-PT-1182390	-	-
526	100	17049458	-	Fludeoxyglucose F-18	Neoplasm Malignant	Alopecia;Off Label Use	Non-Serious	Non-Serious	Male	11-OCT-2019	19-NOV-2019	Non-Expedited	80 YR	95.46 KG	Cardinal Health	Healthcare Professional	Not Specified	-	21-OCT-2019	19-NOV-2019	US	Not Specified	US-CARDINAL HEALTH 414, LLC-2077000	-	-
527	101	16084418	-	Fludeoxyglucose F-18	Positron Emission Tomogram	Product Packaging Issue;Drug Ineffective	Non-Serious	Non-Serious	Not Specified	19-SEP-2018	18-MAR-2019	Non-Expedited	Not Specified	Not Specified	Lantheus Medical Imaging	Consumer	Not Specified	-	19-SEP-2018	18-MAR-2019	US	Not Specified	US-LANTHEUS-LMI-2018-00485	-	-
528	102	16084398	-	Fludeoxyglucose F-18	Positron Emission Tomogram	Drug Ineffective	Non-Serious	Non-Serious	Female	SEP-2018	18-MAR-2019	Non-Expedited	71 YR	Not Specified	Lantheus Medical Imaging	Healthcare Professional	Not Specified	-	12-SEP-2018	18-MAR-2019	US	Not Specified	US-LANTHEUS-LMI-2018-00484	-	-
529	103	16084389	-	Fludeoxyglucose F-18	Positron Emission Tomogram	Drug Ineffective;Wrong Technique In Product Usage Process	Non-Serious	Non-Serious	Female	SEP-2018	18-MAR-2019	Non-Expedited	36 YR	Not Specified	Lantheus Medical Imaging	Healthcare Professional	Not Specified	-	12-SEP-2018	18-MAR-2019	US	Not Specified	US-LANTHEUS-LMI-2018-00483	-	-
530	104	14090994	-	Fludeoxyglucose F-18;Vemurafenib;Cobimetinib	Malignant Melanoma	Dehydration;Delirium;Cystitis;Confusional State	Serious	Hospitalized	Female	03-OCT-2017	20-NOV-2018	Expedited	66 YR	Not Specified	Roche	Healthcare Professional	Not Specified	Neoral;Benzbromarone;Prednisolone;Amoxicillin	15-NOV-2018	16-OCT-2017	NL	Not Specified	NL-ROCHE-2005226	-	-
531	105	15632385	-	Fludeoxyglucose F-18	Diagnostic Procedure	Renal Oncocytoma	Serious	Other Outcomes	Male	09-MAY-2017	19-NOV-2018	Direct	69 YR	140.85 KG	Fda-Ctu	Healthcare Professional	Health Professional	Nexium;Simvastatin;Lisinopril;Amlodipine Besylate;Tamsulosin;Clopidogrel;Hydrochlorothiazide;Metformin Hydrochloride	-	19-NOV-2018	US	Not Specified	-	-	Yes
532	106	14854604	-	Fludeoxyglucose F-18	-	Chest Pain;Off Label Use	Non-Serious	Non-Serious	Female	19-FEB-2018	07-MAY-2018	Non-Expedited	49 YR	Not Specified	Cardinal Health	Consumer	Not Specified	-	19-FEB-2018	07-MAY-2018	US	Not Specified	US-CARDINAL HEALTH 414, LLC-2047325	-	-
533	107	14112500	-	Fludeoxyglucose F-18	Positron Emission Tomogram	Death	Serious	Died	Female	06-OCT-2017	20-OCT-2017	Expedited	55 YR	Not Specified	Petnet	Healthcare Professional	Not Specified	-	06-OCT-2017	20-OCT-2017	US	Not Specified	US-PETNET SOLUTIONS, INC.-2031079	-	-
534	108	13921507	-	Fludeoxyglucose F-18	Positron Emission Tomogram	Syncope	Serious	Other Outcomes	Female	16-AUG-2017	30-AUG-2017	Expedited	44 YR	65.46 KG	Petnet	Healthcare Professional	Not Specified	-	16-AUG-2017	30-AUG-2017	US	Not Specified	US-PETNET SOLUTIONS, INC.-2025309	N/A	-
535	109	13621568	-	Fludeoxyglucose F-18	Neoplasm Malignant;Positron Emission Tomogram	Abdominal Pain;Pyrexia;Diarrhoea;Chills;Urinary Tract Infection;Night Sweats;Dehydration;Gastroenteritis Viral;Headache	Serious	Hospitalized	Male	17-MAY-2017	07-JUN-2017	Expedited	67 YR	72 KG	Cardinal Health	Healthcare Professional	Not Specified	Isovue 300	02-JUN-2017	07-JUN-2017	US	Not Specified	US-CARDINAL HEALTH 414, LLC-2021649	-	-
536	110	13619558	Arcoxia	Etoricoxib;Fludeoxyglucose F-18;Furosemide	Computerised Tomogram;Oedema;Pain;Product Used For Unknown Indication	Glomerulonephritis	Serious	Hospitalized	Male	27-MAR-2017	06-JUN-2017	Expedited	80 YR	Not Specified	Validus	Healthcare Professional	Not Specified	Indapamide\Perindopril Erbumine;Pantoprazole;Metformin Pamoate;Glucor	30-MAY-2017	06-JUN-2017	FR	Not Specified	FR-VALIDUS PHARMACEUTICALS LLC-FR-2017VAL000847	-	-
537	111	13587704	-	Fludeoxyglucose F-18	Neoplasm Malignant;Positron Emission Tomogram	Nausea;Vomiting	Non-Serious	Non-Serious	Male	27-APR-2017	26-MAY-2017	Non-Expedited	31 YR	109.55 KG	Cardinal Health	Healthcare Professional	Not Specified	-	29-APR-2017	26-MAY-2017	US	Not Specified	US-CARDINAL HEALTH 414, LLC-2021291	-	-
538	112	13587700	-	Fludeoxyglucose F-18	Positron Emission Tomogram	Gastrointestinal Disorder;Nausea;Vomiting;Malaise	Non-Serious	Non-Serious	Male	27-APR-2017	26-MAY-2017	Non-Expedited	Not Specified	Not Specified	Cardinal Health	Healthcare Professional	Not Specified	Avodart;Prilosec	29-APR-2017	26-MAY-2017	US	Not Specified	US-CARDINAL HEALTH 414, LLC-2021290	-	-
539	113	13152975	-	Acetaminophen\Hydrocodone;Linsitinib;Fludeoxyglucose F-18	Gastrointestinal Stromal Tumour;Pain Management;Product Used For Unknown Indication	Pancreatitis;Abdominal Pain	Serious	Hospitalized;Other Outcomes	Female	23-MAR-2015	26-JAN-2017	Expedited	49 YR	58 KG	Endo	Healthcare Professional	Not Specified	Hydromorphone	11-JAN-2017	26-JAN-2017	US	Not Specified	US-ENDO PHARMACEUTICALS INC-2017-000236	-	-
540	114	12915686	-	Cyclophosphamide;Vincristine Sulfate;Prednisone;Doxorubicin Hydrochloride;Etoposide;Methotrexate;Fludeoxyglucose F-18;Rituximab	-	Disease Progression;Burkitt's Lymphoma	Serious	Died	Male	29-NOV-2013	03-NOV-2016	Direct	23 YR	83.5 KG	Fda-Ctu	Consumer	Not Specified	-	-	03-NOV-2016	US	Not Specified	-	-	-
541	115	12915621	-	Prednisone;Etoposide;Vincristine Sulfate;Doxorubicin Hydrochloride;Rituximab;Cyclophosphamide;Methotrexate;Fludeoxyglucose F-18	-	Diffuse Large B-Cell Lymphoma;Thrombocytopenia;Malignant Neoplasm Progression;Myelosuppression	Serious	Died	Male	10-DEC-2013	03-NOV-2016	Direct	58 YR	68.4 KG	Fda-Ctu	Not Specified	Not Specified	-	-	03-NOV-2016	US	Not Specified	-	-	-
542	116	12904128	-	Vincristine Sulfate;Rituximab;Doxorubicin Hydrochloride;Etoposide;Prednisone;Cyclophosphamide;Fludeoxyglucose F-18;Methotrexate	-	Burkitt's Lymphoma;Neoplasm Progression	Serious	Hospitalized;Died	Male	29-NOV-2013	01-NOV-2016	Direct	23 YR	83.5 KG	Fda-Ctu	Consumer	Not Specified	-	-	01-NOV-2016	US	Not Specified	-	-	-
543	117	12904117	-	Etoposide;Doxorubicin Hydrochloride;Vincristine Sulfate;Fludeoxyglucose F-18;Prednisone;Cyclophosphamide;Methotrexate;Rituximab	-	Myelosuppression;Thrombocytopenia;Malignant Neoplasm Progression	Serious	Died	Male	10-DEC-2013	01-NOV-2016	Direct	58 YR	68.4 KG	Fda-Ctu	Not Specified	Not Specified	-	-	01-NOV-2016	US	Not Specified	-	-	-
544	118	11672688	-	Fludeoxyglucose F-18	Small Cell Lung Cancer	Dyspnoea;Cough;Wheezing;Lung Opacity	Serious	Hospitalized	Male	23-OCT-2015	26-OCT-2015	Direct	56 YR	88.7 KG	-	Healthcare Professional	Health Professional	-	-	26-OCT-2015	Not Specified	Not Specified	-	-	-
545	119	10562101	Omnipaque	Iohexol;Fludeoxyglucose F-18	Diagnostic Procedure;Paraganglion Neoplasm	Blood Pressure Increased;Headache;Feeling Hot;Chest Discomfort	Serious	Hospitalized	Female	21-OCT-2014	04-NOV-2014	Expedited	53 YR	102 KG	Ge Healthcare	Healthcare Professional	Not Specified	-	23-OCT-2014	04-NOV-2014	NZ	Not Specified	NZ-GE HEALTHCARE MEDICAL DIAGNOSTICS-OMPQ-PR-1410S-1335	-	-
546	120	10331939	-	Bendamustine;Fludeoxyglucose F-18;Ofatumumab	B-Cell Lymphoma	Sepsis	Serious	Life Threatening;Hospitalized	Female	01-JUL-2014	22-JUL-2014	Expedited	49 YR	93.1 KG	Glaxosmithkline	Healthcare Professional	Not Specified	-	18-JUL-2014	22-JUL-2014	US	Not Specified	US-GLAXOSMITHKLINE-A1082020A	-	-
547	121	9796381	-	Bendamustine;Bortezomib;Fludeoxyglucose F-18;Ofatumumab	B-Cell Lymphoma	Vomiting;Nausea;Escherichia Infection;Diarrhoea	Serious	Hospitalized;Died	Female	03-DEC-2013	03-MAR-2014	Expedited	64 YR	53.9 KG	Glaxosmithkline	Healthcare Professional	Not Specified	-	27-FEB-2014	03-JAN-2014	US	Not Specified	US-GLAXOSMITHKLINE-A1055199A	-	-
548	122	9676083	-	Fludeoxyglucose F-18;Sodium Chloride	Catheter Management;Positron Emission Tomogram;Scan	Feeling Hot;Hyperhidrosis	Non-Serious	Non-Serious	Male	21-OCT-2013	10-DEC-2013	Non-Expedited	62 YR	93.07 KG	Baxter	Consumer	Not Specified	-	04-DEC-2013	07-NOV-2013	US	Not Specified	US-BAXTER-2013BAX043456	-	-
549	123	9686427	-	Sodium Chloride;Fludeoxyglucose F-18	Catheter Management;Lymphadenopathy Mediastinal;Positron Emission Tomogram;Pulmonary Mass;Scan	Feeling Hot;Hyperhidrosis	Non-Serious	Non-Serious	Male	24-OCT-2013	20-NOV-2013	Non-Expedited	69 YR	82.63 KG	Baxter	Consumer	Not Specified	-	08-NOV-2013	13-NOV-2013	US	Not Specified	US-BAXTER-2013BAX043462	-	-
550	124	9676084	-	Sodium Chloride;Fludeoxyglucose F-18	Catheter Management;Diffuse Large B-Cell Lymphoma;Extranodal Marginal Zone B-Cell Lymphoma (Malt Type);Positron Emission Tomogram;Scan	Feeling Hot;Asthenia;Loss Of Personal Independence In Daily Activities	Non-Serious	Non-Serious	Male	25-OCT-2013	20-NOV-2013	Non-Expedited	88 YR	76.27 KG	Baxter	Consumer	Not Specified	-	08-NOV-2013	07-NOV-2013	US	Not Specified	US-BAXTER-2013BAX043464	-	-
551	125	9682125	-	Fludeoxyglucose F-18;Sodium Chloride	Catheter Management;Positron Emission Tomogram;Scan	Hyperhidrosis;Feeling Hot	Non-Serious	Non-Serious	Female	24-OCT-2013	18-NOV-2013	Non-Expedited	71 YR	71.28 KG	Baxter	Consumer	Not Specified	-	08-NOV-2013	11-NOV-2013	US	Not Specified	US-BAXTER-2013BAX043461	-	-
552	126	9679152	-	Sodium Chloride;Fludeoxyglucose F-18	Catheter Management;Positron Emission Tomogram;Scan	Feeling Hot;Asthenia;Hyperhidrosis	Non-Serious	Non-Serious	Female	23-OCT-2013	18-NOV-2013	Non-Expedited	56 YR	59.02 KG	Baxter	Consumer	Not Specified	-	08-NOV-2013	08-NOV-2013	US	Not Specified	US-BAXTER-2013BAX043460	-	-
553	127	9676334	-	Fludeoxyglucose F-18;Sodium Chloride	Catheter Management;Positron Emission Tomogram;Scan	Hyperhidrosis;Feeling Hot	Non-Serious	Non-Serious	Female	23-OCT-2013	18-NOV-2013	Non-Expedited	64 YR	76.27 KG	Baxter	Consumer	Not Specified	-	08-NOV-2013	07-NOV-2013	US	Not Specified	US-BAXTER-2013BAX043459	-	-
554	128	9676075	-	Sodium Chloride;Fludeoxyglucose F-18	Catheter Management;Positron Emission Tomogram;Scan	Hyperhidrosis;Feeling Hot	Non-Serious	Non-Serious	Female	22-OCT-2013	18-NOV-2013	Non-Expedited	53 YR	97.61 KG	Baxter	Consumer	Not Specified	-	08-NOV-2013	07-NOV-2013	US	Not Specified	US-BAXTER-2013BAX043458	-	-
555	129	9672279	-	Sodium Chloride;Fludeoxyglucose F-18	Breast Cancer;Catheter Management;Positron Emission Tomogram;Scan	Unresponsive To Stimuli;Hyperhidrosis;Blood Glucose Decreased;Incoherent	Serious	Life Threatening;Hospitalized;Other Outcomes	Female	28-OCT-2013	18-NOV-2013	Expedited	78 YR	50.39 KG	Baxter	Consumer	Not Specified	-	08-NOV-2013	06-NOV-2013	US	Not Specified	US-BAXTER-2013BAX043465	-	-
556	130	9672252	-	Fludeoxyglucose F-18;Sodium Chloride	Catheter Management;Malignant Melanoma;Ovarian Mass;Positron Emission Tomogram;Scan	Incoherent;Pallor;Communication Disorder;Asthenia;Hyperhidrosis;Blood Glucose Decreased;Malaise	Serious	Other Outcomes;Life Threatening;Disabled	Female	25-OCT-2013	18-NOV-2013	Expedited	60 YR	68.1 KG	Baxter	Consumer	Not Specified	-	08-NOV-2013	06-NOV-2013	US	Not Specified	US-BAXTER-2013BAX043463	-	-
557	131	9670314	-	Fludeoxyglucose F-18;Sodium Chloride	Catheter Management;Positron Emission Tomogram;Scan	Feeling Hot;Hyperhidrosis;Blood Pressure Abnormal;Cold Sweat	Non-Serious	Non-Serious	Female	22-OCT-2013	18-NOV-2013	Non-Expedited	74 YR	65.83 KG	Baxter	Consumer	Not Specified	-	08-NOV-2013	05-NOV-2013	US	Not Specified	US-BAXTER-2013BAX043457	-	-
558	132	9670307	-	Fludeoxyglucose F-18;Sodium Chloride	Catheter Management;Positron Emission Tomogram;Scan	Hyperhidrosis;Asthenia;Tremor;Lethargy;Feeling Hot	Non-Serious	Non-Serious	Female	21-OCT-2013	18-NOV-2013	Non-Expedited	66 YR	66.74 KG	Baxter	Consumer	Not Specified	-	08-NOV-2013	05-NOV-2013	US	Not Specified	US-BAXTER-2013BAX043455	-	-
559	133	9670291	-	Sodium Chloride;Fludeoxyglucose F-18	Catheter Management;Diabetes Mellitus;Positron Emission Tomogram;Scan	Feeling Hot;Hyperhidrosis	Non-Serious	Non-Serious	Male	21-OCT-2013	15-NOV-2013	Non-Expedited	76 YR	111.23 KG	Baxter	Healthcare Professional	Not Specified	Insulin Nos	08-NOV-2013	05-NOV-2013	US	Not Specified	US-BAXTER-2013BAX043454	-	-
560	134	9688348	Visipaque	Iodixanol;Fludeoxyglucose F-18	Diagnostic Procedure;Product Used For Unknown Indication	Pruritus;Oedema Mucosal;Skin Oedema	Serious	Life Threatening	Female	01-OCT-2013	14-NOV-2013	Expedited	62 YR	Not Specified	Ge Healthcare	Healthcare Professional	Not Specified	-	05-NOV-2013	14-NOV-2013	FR	Not Specified	FR-GE HEALTHCARE MEDICAL DIAGNOSTICS-VISP-PR-1311S-0894	-	-
561	135	9632749	-	Fludeoxyglucose F-18;Ofatumumab;Bendamustine	B-Cell Lymphoma	Febrile Neutropenia	Serious	Hospitalized	Female	30-AUG-2013	28-OCT-2013	Expedited	47 YR	75.3 KG	Glaxosmithkline	Healthcare Professional	Not Specified	-	21-OCT-2013	18-OCT-2013	US	Not Specified	US-GLAXOSMITHKLINE-A1045840A	-	-
562	136	9464039	Visipaque	Iodixanol;Fludeoxyglucose	Diagnostic Procedure;Product Used For Unknown Indication	Pruritus;Dermatitis Bullous;Skin Exfoliation	Serious	Other Outcomes	Male	27-APR-2013	10-OCT-2013	Expedited	59 YR	Not Specified	Ge Healthcare	Healthcare Professional	Not Specified	-	03-OCT-2013	19-AUG-2013	FR	Not Specified	FR-GE HEALTHCARE MEDICAL DIAGNOSTICS-VISP-PR-1308S-0771	-	-
563	137	9565209	-	Erlotinib;Fludeoxyglucose F-18;Vismodegib	Adenocarcinoma Pancreas;Product Used For Unknown Indication	Pulmonary Embolism;Deep Vein Thrombosis;Incorrect Dose Administered;Disease Progression	Serious	Hospitalized;Died	Female	05-OCT-2011	30-SEP-2013	Expedited	63 YR	56 KG	Roche	Healthcare Professional	Not Specified	-	18-OCT-2011	30-SEP-2013	US	Not Specified	US-ROCHE-1007353	-	-
564	138	9518557	-	Fludeoxyglucose F-18	Positron Emission Tomogram	Glioblastoma Multiforme	Serious	Life Threatening	Female	15-NOV-2012	10-SEP-2013	Direct	64 YR	205 LB	-	Healthcare Professional	Health Professional	Detrol La;Niaspan Er;Clarinex	-	10-SEP-2013	Not Specified	Not Specified	-	-	-
565	139	9469924	-	Fludeoxyglucose F-18	Magnetic Resonance Imaging Head	Glioblastoma Multiforme	Serious	Life Threatening	Female	NOV-2012	20-AUG-2013	Direct	63 YR	93.2 KG	-	Healthcare Professional	Health Professional	Clarinex;Niaspan;Detrol La	-	20-AUG-2013	Not Specified	Not Specified	-	-	-
566	140	9036731	-	Fludeoxyglucose F-18	Positron Emission Tomogram	Syncope;Rash	Serious	Hospitalized	Male	06-DEC-2012	13-FEB-2013	Expedited	65 YR	Not Specified	Petnet	Not Specified	Health Professional ,Foreign	-	21-JAN-2013	14-JAN-2013	Not Specified	Not Specified	PET-0001-2012	-	-
567	141	9115432	-	Fludeoxyglucose F-18	Positron Emission Tomogram	Vomiting;Post Procedural Complication	Non-Serious	Non-Serious	Female	09-JAN-2013	29-JAN-2013	Expedited	Not Specified	Not Specified	Cardinal Health	Healthcare Professional	Health Professional	-	11-JAN-2013	29-JAN-2013	Not Specified	Not Specified	964321442-2013-00001	-	-
568	142	9115410	-	Fludeoxyglucose F-18	Positron Emission Tomogram	Vomiting	Non-Serious	Non-Serious	Male	09-JAN-2013	29-JAN-2013	Expedited	Not Specified	Not Specified	Cardinal Health	Healthcare Professional	Health Professional	-	11-JAN-2013	29-JAN-2013	Not Specified	Not Specified	964321442-2013-00002	-	-
569	143	9023674	-	Bevacizumab;Gadopentetate\Meglumine;Trifluridine;Erlotinib;Fludeoxyglucose F-18	Bronchial Carcinoma;Product Used For Unknown Indication	Sudden Death	Serious	Died	Female	12-JAN-2013	21-JAN-2013	Expedited	58 YR	83 KG	Astellas	Healthcare Professional	Not Specified	Naloxone Hydrochloride\Tilidine Hydrochloride;Mcp;Hydrochlorothiazide;Pantozol;Spironolactone;Ibuprofen;Dipyrone	15-JAN-2013	21-JAN-2013	DE	Not Specified	DE-ASTELLAS-2013US000711	-	-
570	144	8749621	-	Rituximab;Prednisone;Doxorubicin Hydrochloride;Etoposide;Cyclophosphamide;Fludeoxyglucose F-18;Vincristine Sulfate	-	Tachycardia;Clostridium Difficile Colitis;Pancytopenia;Neutropenia;Pyrexia	Serious	Hospitalized	Male	09-JAN-2012	22-AUG-2012	Direct	65 YR	94 KG	-	Not Specified	Not Specified	-	-	22-AUG-2012	Not Specified	Not Specified	-	-	-
571	145	8620298	-	Fludeoxyglucose F-18	Positron Emission Tomogram	Pruritus;Rash;Tachycardia;Flushing;Hypotension;Oedema;Urticaria	Serious	Hospitalized	Male	18-MAY-2012	06-JUN-2012	Expedited	60 YR	160 LB	Petnet	Healthcare Professional	User Facility ,Health Professional	Tramadol;Synthroid;Aspirin;Probiotics Nos;Tums;Multi-Vitamin	18-MAY-2012	06-JUN-2012	Not Specified	Not Specified	PC0000736	-	-
572	146	8555705	-	Doxorubicin Hydrochloride;Prednisone;Vincristine Sulfate;Cyclophosphamide;Etoposide;Rituximab;Fludeoxyglucose F-18	-	Tachycardia;Diarrhoea;Clostridium Test Positive;Pancytopenia;Body Temperature Increased	Serious	Hospitalized	Male	09-JAN-2012	07-MAY-2012	Direct	65 YR	94 KG	-	Healthcare Professional	Health Professional	Multi-Vitamin;Zofran	-	07-MAY-2012	Not Specified	Not Specified	-	-	-
573	147	8499632	-	Fludeoxyglucose F-18	Diagnostic Procedure	Dysphonia;Anaphylactic Reaction;Sensation Of Foreign Body;Contrast Media Reaction;Stridor	Serious	Hospitalized	Female	09-JAN-2012	02-APR-2012	Expedited	82 YR	156 LB	Petnet	Healthcare Professional	User Facility ,Health Professional	Oxybutynin.;Levothyroxine;Rosuvastatin;Alendronate;Aspirin;Furosemide;Brimonidine Tartrate;Chondroitin Sulfate (Bovine)\Glucosamine Sulfate;Latanoprost;Tramadol;Carvedilol;Acetaminophen;Warfarin Sodium;Famotidine;Losartan Potassium	08-MAR-2012	02-APR-2012	Not Specified	Not Specified	PC0000735	-	-
574	1	24525370	Detectnet	Copper Oxodotreotide Cu-64	-	Nasopharyngitis;Blindness	Serious	Other Outcomes;Disabled	Male	OCT-2024	19-OCT-2024	Expedited	Not Specified	Not Specified	Jss Medical Research	Healthcare Professional	Not Specified	-	07-OCT-2024	19-OCT-2024	US	Not Specified	US-JSS Medical Research-2163360	-	-
575	2	20291423	Detectnet	Copper Oxodotreotide Cu-64	-	Gastrointestinal Sounds Abnormal	Serious	Other Outcomes	Male	08-NOV-2021	03-JAN-2022	Direct	69 YR	78.47 KG	Fda-Ctu	Consumer	Not Specified	Pantoprazole;Vitamin D;Calcium;Crestor;Vitamin A	-	03-JAN-2022	Not Specified	Not Specified	-	-	-
576	3	19707407	-	Copper Oxodotreotide Cu-64	-	Pruritus;Contrast Media Allergy;Urticaria	Non-Serious	Non-Serious	Female	23-JUN-2021	16-AUG-2021	Direct	87 YR	44 KG	Fda-Ctu	Healthcare Professional	Health Professional	-	-	16-AUG-2021	US	Not Specified	-	-	-
577	4	19429195	Detectnet	Copper Oxodotreotide Cu-64	-	Pain In Jaw;Musculoskeletal Chest Pain;Hypertension;Heart Rate Decreased;Dyspnoea;Chest Discomfort	Non-Serious	Non-Serious	Female	27-MAY-2021	17-JUN-2021	Direct	76 YR	73 KG	Fda-Ctu	Healthcare Professional	Health Professional	-	-	17-JUN-2021	US	Not Specified	-	-	-
578	5	19308797	-	Copper Oxodotreotide Cu-64	-	Chest Pain;Chest Discomfort;Dyspnoea	Non-Serious	Non-Serious	Female	19-MAR-2021	26-MAY-2021	Direct	61 YR	50 KG	Fda-Ctu	Healthcare Professional	Health Professional	-	-	26-MAY-2021	US	Not Specified	-	-	-
579	6	19308747	-	Copper Oxodotreotide Cu-64	-	Chest Discomfort	Non-Serious	Non-Serious	Male	10-MAR-2021	26-MAY-2021	Direct	52 YR	142 KG	Fda-Ctu	Healthcare Professional	Health Professional	-	-	26-MAY-2021	US	Not Specified	-	-	-
580	7	19308729	-	Copper Oxodotreotide Cu-64	-	Dyspnoea;Chest Discomfort	Non-Serious	Non-Serious	Female	31-MAR-2021	26-MAY-2021	Direct	58 YR	97 KG	Fda-Ctu	Healthcare Professional	Health Professional	-	-	26-MAY-2021	US	Not Specified	-	-	-
581	1	24191599	-	Leuprolide;Gallium Oxodotreotide Ga-68;Abiraterone;Lanreotide	Hormone-Refractory Prostate Cancer;Pancreatic Neuroendocrine Tumour	Drug Ineffective	Serious	Other Outcomes	Male	-	06-DEC-2024	Expedited	71 YR	Not Specified	Aurobindo	Healthcare Professional	Not Specified	-	22-NOV-2024	08-AUG-2024	US	Not Specified	US-AUROBINDO-AUR-APL-2024-039149	Kulkarni R, Abdelrahman A, Ghesani M, Ghesani N, Wolin E, Oh W, et al. Management Of Concomitant Prostate Cancer and Pancreatic Neuroendocrine Tumour: Role of Nuclear Medicine in therapeutic decision making. Journal-Nuclear-Medicine. 2023;64 (Suppl. 1):1440	-
582	2	23699912	Netspot	Gallium Oxodotreotide Ga-68	Product Used For Unknown Indication	Wrong Patient Received Product	Non-Serious	Non-Serious	Female	-	03-DEC-2024	Non-Expedited	Not Specified	Not Specified	Novartis	Healthcare Professional	Not Specified	-	28-MAR-2024	03-APR-2024	US	Not Specified	NVSC2024US070507	-	-
583	3	23729138	Netspot	Gallium Oxodotreotide Ga-68	Product Used For Unknown Indication	Feeling Abnormal;Carcinoid Syndrome;Erythema	Serious	Other Outcomes	Male	-	28-OCT-2024	Expedited	Not Specified	Not Specified	Novartis	Healthcare Professional	Not Specified	-	23-OCT-2024	10-APR-2024	US	Not Specified	NVSC2024US076330	-	-
584	4	24414457	Netspot	Gallium Oxodotreotide Ga-68	Product Used For Unknown Indication	Vomiting;Malaise;Nausea	Non-Serious	Non-Serious	Male	-	09-OCT-2024	Non-Expedited	50 YR	Not Specified	Novartis	Healthcare Professional	Not Specified	-	04-OCT-2024	09-OCT-2024	US	Not Specified	NVSC2024US197796	-	-
585	5	24253777	Netspot	Gallium Oxodotreotide Ga-68	Neuroendocrine Tumour	Anaphylactic Reaction	Serious	Other Outcomes	Not Specified	-	27-AUG-2024	Expedited	Not Specified	Not Specified	Novartis	Healthcare Professional	Not Specified	-	23-AUG-2024	27-AUG-2024	US	Not Specified	NVSC2024US172232	-	-
586	6	24162977	Netspot	Gallium Oxodotreotide Ga-68	Imaging Procedure	Rash	Non-Serious	Non-Serious	Male	-	01-AUG-2024	Non-Expedited	Not Specified	Not Specified	Novartis	Consumer	Not Specified	-	30-JUL-2024	01-AUG-2024	US	Not Specified	NVSC2024US156727	-	-
587	7	24153265	-	Abiraterone;Lanreotide;Gallium Oxodotreotide Ga-68;Leuprolide	Hormone-Refractory Prostate Cancer;Pancreatic Neuroendocrine Tumour;Prostate Cancer Metastatic	Drug Ineffective	Serious	Other Outcomes	Male	-	30-JUL-2024	Expedited	71 YR	Not Specified	Mylan	Healthcare Professional	Not Specified	Lutetium Lu-177 Vipivotide Tetraxetan	23-JUL-2024	30-JUL-2024	US	Not Specified	US-MYLANLABS-2024M1069789	Kulkarni R, Abdelrahman A, Ghesani M, Ghesani N, Wolin E, Oh W, et al. Management Of Concomitant Prostate Cancer and Pancreatic Neuroendocrine Tumour: Role of Nuclear Medicine in therapeutic decision making. J-Nucl-Med 2023; 64 (Suppl. 1) 1440.	-
588	8	24123073	Netspot	Gallium Oxodotreotide Ga-68	Product Used For Unknown Indication	Scan Gallium Abnormal	Non-Serious	Non-Serious	Not Specified	-	23-JUL-2024	Non-Expedited	Not Specified	Not Specified	Novartis	Healthcare Professional	Not Specified	-	16-JUL-2024	23-JUL-2024	US	Not Specified	NVSC2024US147554	-	-
589	9	24064904	Netspot	Gallium Oxodotreotide Ga-68	Magnetic Resonance Imaging Head	Chest Pain;Heart Rate Decreased;Drug Hypersensitivity;Blood Pressure Increased;Infusion Related Reaction	Serious	Other Outcomes	Female	03-JUL-2024	08-JUL-2024	Direct	44 YR	Not Specified	Fda-Ctu	Healthcare Professional	Not Specified	-	-	08-JUL-2024	Not Specified	Not Specified	-	-	-
590	10	23992654	Netspot	Gallium Oxodotreotide Ga-68	Product Used For Unknown Indication	Vomiting	Non-Serious	Non-Serious	Not Specified	-	20-JUN-2024	Non-Expedited	Not Specified	Not Specified	Novartis	Consumer	Not Specified	-	14-JUN-2024	20-JUN-2024	US	Not Specified	NVSC2024US127994	-	-
591	11	23988312	Netspot	Gallium Oxodotreotide Ga-68	Product Used For Unknown Indication	Vomiting	Non-Serious	Non-Serious	Not Specified	-	19-JUN-2024	Non-Expedited	Not Specified	Not Specified	Novartis	Healthcare Professional	Not Specified	Synthroid	14-JUN-2024	19-JUN-2024	US	Not Specified	NVSC2024US127511	-	-
592	12	23839808	Netspot	Gallium Oxodotreotide Ga-68	Neuroendocrine Tumour	Scan Gallium Abnormal	Non-Serious	Non-Serious	Not Specified	-	14-JUN-2024	Non-Expedited	Not Specified	Not Specified	Novartis	Healthcare Professional	Not Specified	-	15-DEC-2023	10-MAY-2024	US	Not Specified	NVSC2023US280564	-	-
593	13	23954917	Netspot	Gallium Oxodotreotide Ga-68	Product Used For Unknown Indication	Product Impurity;Scan Gallium Abnormal	Non-Serious	Non-Serious	Not Specified	-	12-JUN-2024	Non-Expedited	Not Specified	Not Specified	Novartis	Healthcare Professional	Not Specified	-	06-FEB-2024	10-JUN-2024	US	Not Specified	NVSC2024US120528	-	-
594	14	23339134	Netspot	Gallium Oxodotreotide Ga-68	Carcinoid Tumour Of The Stomach	Abdominal Pain	Non-Serious	Non-Serious	Female	20-DEC-2023	21-MAY-2024	Expedited	Not Specified	73.016 KG	Novartis	Healthcare Professional	Not Specified	-	22-DEC-2023	26-DEC-2023	US	Not Specified	NVSC2023US273694	-	-
595	15	23838004	Netspot	Gallium Oxodotreotide Ga-68	Imaging Procedure	Scan Gallium Abnormal	Non-Serious	Non-Serious	Not Specified	-	09-MAY-2024	Non-Expedited	Not Specified	Not Specified	Novartis	Healthcare Professional	Not Specified	-	09-NOV-2023	09-MAY-2024	US	Not Specified	NVSC2023US280561	-	-
596	16	23820034	Netspot	Dotatate Gallium Ga-68	Product Used For Unknown Indication	Product Administration Error	Non-Serious	Non-Serious	Not Specified	-	06-MAY-2024	Non-Expedited	Not Specified	Not Specified	Novartis	Healthcare Professional	Not Specified	-	26-APR-2024	06-MAY-2024	US	Not Specified	NVSC2024US095080	-	-
597	17	23816935	Netspot	Gallium Oxodotreotide Ga-68	Product Used For Unknown Indication	Blood Aluminium Increased	Non-Serious	Non-Serious	Not Specified	-	04-MAY-2024	Non-Expedited	Not Specified	Not Specified	Novartis	Consumer	Not Specified	-	26-APR-2024	04-MAY-2024	US	Not Specified	NVSC2024US091422	-	-
598	18	23654895	Netspot	Gallium Oxodotreotide Ga-68	Product Used For Unknown Indication	Drug Level Changed;Radioisotope Uptake Increased	Non-Serious	Non-Serious	Not Specified	-	05-APR-2024	Non-Expedited	Not Specified	Not Specified	Novartis	Healthcare Professional	Not Specified	-	04-APR-2024	20-MAR-2024	US	Not Specified	NVSC2024US059282	-	-
599	19	23408988	Netspot	Gallium Oxodotreotide Ga-68	Product Used For Unknown Indication	Carcinoid Crisis	Serious	Other Outcomes	Female	25-JAN-2023	17-JAN-2024	Expedited	Not Specified	Not Specified	Novartis	Healthcare Professional	Not Specified	-	12-JAN-2024	17-JAN-2024	US	Not Specified	NVSC2024US008731	-	-
600	20	23184702	Netspot	Gallium Oxodotreotide Ga-68	Neuroendocrine Tumour	Wrong Product Administered	Non-Serious	Non-Serious	Male	-	15-NOV-2023	Non-Expedited	Not Specified	Not Specified	Novartis	Consumer	Not Specified	-	13-NOV-2023	15-NOV-2023	US	Not Specified	NVSC2023US243104	-	-
601	21	23138747	Netspot	Gallium Oxodotreotide Ga-68	Product Used For Unknown Indication	Flushing;Chest Pain	Non-Serious	Non-Serious	Female	25-OCT-2023	03-NOV-2023	Non-Expedited	Not Specified	Not Specified	Novartis	Consumer	Not Specified	Calcium;Diovan;Spiriva;Ondansetron Hydrochloride;Magnesium;Colace;Synthroid	30-OCT-2023	02-NOV-2023	US	Not Specified	NVSC2023US234355	-	-
602	22	23127414	Netspot	Gallium Oxodotreotide Ga-68	Neuroendocrine Tumour;Product Used For Unknown Indication;Small Intestine Neuroendocrine Tumour	Neck Pain;Blood Pressure Increased;Headache;Chest Discomfort	Non-Serious	Non-Serious	Female	18-SEP-2023	31-OCT-2023	Non-Expedited	65 YR	87.9 KG	Novartis	Healthcare Professional	Not Specified	Amlodipine\Hydrochlorothiazide\Olmesartan;Synthroid	19-OCT-2023	31-OCT-2023	US	Not Specified	NVSC2023US203592	-	-
603	23	22972724	Netspot	Gallium Oxodotreotide Ga-68	Pancreatic Neuroendocrine Tumour	Abdominal Pain	Non-Serious	Non-Serious	Female	18-SEP-2023	22-SEP-2023	Non-Expedited	Not Specified	77.098 KG	Novartis	Healthcare Professional	Not Specified	-	18-SEP-2023	22-SEP-2023	US	Not Specified	NVSC2023US202373	-	-
604	24	22859492	Netspot	Gallium Oxodotreotide Ga-68	Product Used For Unknown Indication	Blood Glucose Decreased	Non-Serious	Non-Serious	Not Specified	17-AUG-2023	24-AUG-2023	Non-Expedited	Not Specified	Not Specified	Novartis	Healthcare Professional	Not Specified	-	21-AUG-2023	24-AUG-2023	US	Not Specified	NVSC2023US183221	-	-
605	25	22722750	Netspot	Gallium Oxodotreotide Ga-68	Imaging Procedure	Nausea;Dizziness;Hypertension	Non-Serious	Non-Serious	Female	-	21-JUL-2023	Non-Expedited	Not Specified	Not Specified	Novartis	Healthcare Professional	Not Specified	-	13-JUL-2023	19-JUL-2023	US	Not Specified	NVSC2023US157347	-	-
606	26	18503948	Netspot	Gallium Oxodotreotide Ga-68	Product Used For Unknown Indication	Product Quality Control Issue	Non-Serious	Non-Serious	Not Specified	-	26-MAY-2023	Non-Expedited	Not Specified	Not Specified	Novartis	Healthcare Professional	Not Specified	-	04-SEP-2019	14-NOV-2020	US	Not Specified	PHEH2019US038752	-	-
607	27	21927196	Netspot	Gallium Oxodotreotide Ga-68	Product Used For Unknown Indication	Hypersensitivity	Non-Serious	Non-Serious	Not Specified	-	20-MAR-2023	Non-Expedited	Not Specified	Not Specified	Novartis	Healthcare Professional	Not Specified	-	14-MAR-2023	30-JAN-2023	US	Not Specified	NVSC2023US019832	-	-
608	28	21926131	Lutathera	Lutetium Oxodotreotide Lu-177;Gallium Oxodotreotide Ga-68	Paraganglion Neoplasm;Product Used For Unknown Indication	Fatigue;Hypertension;Catecholamine Crisis;Constipation	Serious	Hospitalized	Female	18-JAN-2023	22-FEB-2023	Expedited	76 YR	50.9 KG	Novartis	Healthcare Professional	Not Specified	Losartan;Liothyronine;Gabapentin;Tramadol;Levothyroxine;Carvedilol;Amlodipine;Prolia;Terazosin;Miralax;Rosuvastatin	14-FEB-2023	30-JAN-2023	US	Not Specified	NVSC2023US017930	-	-
609	29	21924969	Netspot	Gallium Oxodotreotide Ga-68	Product Used For Unknown Indication	Hypersensitivity	Non-Serious	Non-Serious	Not Specified	-	21-FEB-2023	Non-Expedited	Not Specified	Not Specified	Novartis	Healthcare Professional	Not Specified	-	15-FEB-2023	30-JAN-2023	US	Not Specified	NVSC2023US019799	-	-
610	30	21950344	Netspot	Gallium Oxodotreotide Ga-68	Product Used For Unknown Indication	Hypersensitivity	Non-Serious	Non-Serious	Not Specified	-	03-FEB-2023	Non-Expedited	Not Specified	Not Specified	Novartis	Healthcare Professional	Not Specified	-	25-JAN-2023	03-FEB-2023	US	Not Specified	NVSC2023US024399	-	-
611	31	21949380	Netspot	Gallium Oxodotreotide Ga-68	Product Used For Unknown Indication	Hypersensitivity	Non-Serious	Non-Serious	Not Specified	-	03-FEB-2023	Non-Expedited	Not Specified	Not Specified	Novartis	Healthcare Professional	Not Specified	-	25-JAN-2023	03-FEB-2023	US	Not Specified	NVSC2023US024729	-	-
612	32	21701775	Netspot	Gallium Oxodotreotide Ga-68	Product Used For Unknown Indication	Poor Quality Product Administered;Out Of Specification Test Results	Non-Serious	Non-Serious	Not Specified	-	12-DEC-2022	Non-Expedited	Not Specified	Not Specified	Novartis	Healthcare Professional	Not Specified	-	02-DEC-2022	08-DEC-2022	US	Not Specified	NVSC2022US285320	-	-
613	33	21349333	Netspot	Gallium Oxodotreotide Ga-68	Product Used For Unknown Indication	Scan Gallium Abnormal	Non-Serious	Non-Serious	Not Specified	-	22-SEP-2022	Non-Expedited	Not Specified	Not Specified	Novartis	Healthcare Professional	Not Specified	-	14-SEP-2022	19-SEP-2022	US	Not Specified	NVSC2022US209117	-	-
614	34	21052078	Lutathera	Lutetium Oxodotreotide Lu-177;Amino Acids, Source Unspecified;Gallium Oxodotreotide Ga-68	Paraganglion Neoplasm	Haemothorax;Anaemia;Cholecystitis	Serious	Other Outcomes;Hospitalized	Male	07-DEC-2018	16-AUG-2022	Expedited	49 YR	93.8 KG	Novartis	Healthcare Professional	Not Specified	-	10-AUG-2022	07-JUL-2022	US	Not Specified	NVSC2022US153368	-	-
615	35	21091134	Netspot	Gallium Oxodotreotide Ga-68	Product Used For Unknown Indication	Scan Gallium Abnormal	Non-Serious	Non-Serious	Not Specified	-	16-JUL-2022	Non-Expedited	Not Specified	Not Specified	Novartis	Healthcare Professional	Not Specified	-	08-JUL-2022	16-JUL-2022	US	Not Specified	NVSC2022US160298	-	-
616	36	20876533	Netspot	Gallium Oxodotreotide Ga-68	Product Used For Unknown Indication	Injection Site Pain	Non-Serious	Non-Serious	Female	-	26-MAY-2022	Non-Expedited	Not Specified	Not Specified	Novartis	Consumer	Not Specified	-	20-MAY-2022	26-MAY-2022	US	Not Specified	NVSC2022US121202	-	-
617	37	20776219	-	Gallium Oxodotreotide Ga-68	Product Used For Unknown Indication	Abdominal Pain Upper;Dyspepsia;Gastrointestinal Motility Disorder;Nausea;Vomiting	Serious	Hospitalized	Female	-	02-MAY-2022	Expedited	Not Specified	Not Specified	Novartis	Healthcare Professional	Not Specified	-	22-APR-2022	02-MAY-2022	US	Not Specified	NVSC2022US094932	-	-
618	38	20745287	Netspot	Gallium Oxodotreotide Ga-68	Product Used For Unknown Indication	Chest Pain;Abdominal Pain	Non-Serious	Non-Serious	Not Specified	-	25-APR-2022	Non-Expedited	Not Specified	Not Specified	Novartis	Healthcare Professional	Not Specified	-	22-APR-2022	25-APR-2022	US	Not Specified	NVSC2022US095083	-	-
619	39	20739102	Netspot	Gallium Oxodotreotide Ga-68	Product Used For Unknown Indication	Scan Gallium Abnormal	Non-Serious	Non-Serious	Not Specified	-	22-APR-2022	Non-Expedited	Not Specified	Not Specified	Novartis	Healthcare Professional	Not Specified	-	21-APR-2022	22-APR-2022	US	Not Specified	NVSC2021US179604	-	-
620	40	20738913	Netspot	Gallium Oxodotreotide Ga-68	Product Used For Unknown Indication	Scan Gallium Abnormal	Non-Serious	Non-Serious	Not Specified	-	22-APR-2022	Non-Expedited	Not Specified	Not Specified	Novartis	Healthcare Professional	Not Specified	-	05-AUG-2021	22-APR-2022	US	Not Specified	NVSC2021US308327	-	-
621	41	20738912	Netspot	Gallium Oxodotreotide Ga-68	Product Used For Unknown Indication	Scan Gallium Abnormal	Non-Serious	Non-Serious	Not Specified	-	22-APR-2022	Non-Expedited	Not Specified	Not Specified	Novartis	Healthcare Professional	Not Specified	-	05-AUG-2021	22-APR-2022	US	Not Specified	NVSC2021US308326	-	-
622	42	20033621	Netspot	Gallium Oxodotreotide Ga-68	Product Used For Unknown Indication	Immune System Disorder;Nausea;Vomiting;Scan Gallium Abnormal	Non-Serious	Non-Serious	Not Specified	29-SEP-2021	20-APR-2022	Non-Expedited	Not Specified	Not Specified	Novartis	Healthcare Professional	Not Specified	Octreotide	22-OCT-2021	04-NOV-2021	US	Not Specified	NVSC2021US243746	-	-
623	43	20376617	Netspot	Gallium Oxodotreotide Ga-68	Product Used For Unknown Indication	Scan Gallium Abnormal	Non-Serious	Non-Serious	Not Specified	-	19-APR-2022	Non-Expedited	Not Specified	Not Specified	Novartis	Consumer	Not Specified	-	11-JAN-2022	25-JAN-2022	US	Not Specified	NVSC2022US014923	-	-
624	44	20650213	Netspot;Lutathera	Lutetium Oxodotreotide Lu-177;Gallium Oxodotreotide Ga-68	Neuroendocrine Tumour;Product Used For Unknown Indication	Arrhythmia;Acute Kidney Injury;White Blood Cell Count Increased;Product Contamination;Cardiac Arrest;Infection	Serious	Life Threatening;Died;Hospitalized	Male	22-MAR-2022	01-APR-2022	Expedited	61 YR	94 KG	Novartis	Healthcare Professional	Not Specified	-	30-MAR-2022	29-MAR-2022	GB	Not Specified	NVSC2022GB070681	-	-
625	45	20622567	Netspot	Gallium Oxodotreotide Ga-68	Product Used For Unknown Indication	Scan Gallium Abnormal	Non-Serious	Non-Serious	Not Specified	-	22-MAR-2022	Non-Expedited	Not Specified	Not Specified	Novartis	Healthcare Professional	Not Specified	-	17-MAR-2022	22-MAR-2022	US	Not Specified	NVSC2022US063032	-	-
626	46	20372953	Netspot	Gallium Oxodotreotide Ga-68	Product Used For Unknown Indication	Scan Gallium Abnormal	Non-Serious	Non-Serious	Not Specified	-	03-MAR-2022	Non-Expedited	Not Specified	Not Specified	Novartis	Healthcare Professional	Not Specified	-	28-FEB-2022	25-JAN-2022	US	Not Specified	NVSC2022US014937	-	-
627	47	19356658	-	Gallium Oxodotreotide Ga-68	Somatostatinoma	Hyperhidrosis;Flushing;Headache;Nausea;Chest Discomfort;Hypertension	Serious	Other Outcomes	Female	04-MAY-2021	02-JUN-2021	Direct	59 YR	125.55 KG	Fda-Ctu	Healthcare Professional	Health Professional	-	-	02-JUN-2021	US	Not Specified	-	-	-
628	48	19356474	-	Gallium Oxodotreotide Ga-68	Pancreatic Neuroendocrine Tumour Metastatic	Flushing;Chest Pain;Nausea;Diarrhoea;Malaise	Serious	Other Outcomes	Male	31-AUG-2018	02-JUN-2021	Direct	40 YR	78.75 KG	Fda-Ctu	Consumer	Not Specified	-	-	02-JUN-2021	US	Not Specified	-	-	-
629	49	19065733	Netspot	Gallium Oxodotreotide Ga-68	Product Used For Unknown Indication	False Positive Radioisotope Investigation Result	Non-Serious	Non-Serious	Not Specified	-	03-MAY-2021	Non-Expedited	Not Specified	Not Specified	Novartis	Healthcare Professional	Not Specified	-	18-MAR-2021	27-MAR-2021	US	Not Specified	NVSC2021US064734	-	-
630	50	19098101	Netspot	Gallium Oxodotreotide Ga-68	Product Used For Unknown Indication	Abdominal Discomfort;Nausea	Non-Serious	Non-Serious	Not Specified	-	06-APR-2021	Non-Expedited	Not Specified	Not Specified	Novartis	Healthcare Professional	Not Specified	-	29-MAR-2021	06-APR-2021	US	Not Specified	NVSC2021US072777	-	-
631	51	19083577	Netspot	Gallium Oxodotreotide Ga-68	Product Used For Unknown Indication	Nausea;Malaise;Abdominal Pain Upper	Non-Serious	Non-Serious	Not Specified	-	01-APR-2021	Non-Expedited	Not Specified	Not Specified	Novartis	Healthcare Professional	Not Specified	-	26-MAR-2021	01-APR-2021	US	Not Specified	NVSC2021US071369	-	-
632	52	18570198	Netspot	Gallium Oxodotreotide Ga-68	Product Used For Unknown Indication	Flushing;Nausea	Non-Serious	Non-Serious	Not Specified	-	07-DEC-2020	Non-Expedited	Not Specified	Not Specified	Novartis	Healthcare Professional	Not Specified	-	30-NOV-2020	02-DEC-2020	US	Not Specified	NVSC2020US320742	-	-
633	53	18530658	-	Gallium Oxodotreotide Ga-68	Carcinoid Tumour	Blood Pressure Increased;Nausea;Abdominal Pain;Back Pain;Vomiting	Non-Serious	Non-Serious	Female	04-NOV-2020	21-NOV-2020	Non-Expedited	55 YR	100.45 KG	Novartis	Healthcare Professional	Not Specified	-	10-NOV-2020	21-NOV-2020	US	Not Specified	NVSC2020US303974	-	-
634	54	18261585	Netspot	Gallium Oxodotreotide Ga-68	Product Used For Unknown Indication	Nausea;Vomiting	Non-Serious	Non-Serious	Not Specified	09-MAR-2020	14-SEP-2020	Non-Expedited	Not Specified	Not Specified	Novartis	Consumer	Not Specified	-	08-SEP-2020	14-SEP-2020	US	Not Specified	NVSC2020US247454	-	-
635	55	18237373	Netspot	Gallium Oxodotreotide Ga-68	Product Used For Unknown Indication	Nausea	Non-Serious	Non-Serious	Not Specified	-	07-SEP-2020	Non-Expedited	Not Specified	Not Specified	Novartis	Consumer	Not Specified	-	27-AUG-2020	07-SEP-2020	US	Not Specified	NVSC2020US238275	-	-
636	56	17921192	Netspot	Gallium Oxodotreotide Ga-68	Product Used For Unknown Indication	Abdominal Pain;Vomiting	Non-Serious	Non-Serious	Not Specified	-	22-JUN-2020	Expedited	Not Specified	Not Specified	Aaa Pharma	Consumer	Not Specified	-	17-JUN-2020	22-JUN-2020	US	Not Specified	NVSC2020US170462	-	-
637	57	17837228	Netspot	Gallium Oxodotreotide Ga-68	Product Used For Unknown Indication	Chest Pain	Serious	Hospitalized	Not Specified	-	29-MAY-2020	Expedited	Not Specified	Not Specified	Aaa Pharma	Healthcare Professional	Not Specified	-	19-MAY-2020	29-MAY-2020	US	Not Specified	NVSC2020US140155	-	-
638	58	17648310	Netspot	Gallium Oxodotreotide Ga-68	Neuroendocrine Tumour;Positron Emission Tomogram	Abdominal Pain;Flushing;Dizziness;Chills	Non-Serious	Non-Serious	Not Specified	-	09-APR-2020	Expedited	42 YR	95.9 KG	Aaa Pharma	Healthcare Professional	Not Specified	Sodium Chloride	30-MAR-2020	09-APR-2020	US	Not Specified	NVSC2020US089162	-	-
639	59	17646260	Netspot	Gallium Oxodotreotide Ga-68	Positron Emission Tomogram;Product Used For Unknown Indication	Scan Gallium Abnormal;Vomiting;Nausea	Non-Serious	Non-Serious	Male	10-MAR-2019	08-APR-2020	Expedited	65 YR	104 KG	Aaa Pharma	Healthcare Professional	Not Specified	Lipitor;Ambien;Lotrel	02-APR-2020	08-APR-2020	US	Not Specified	NVSC2020US091969	-	-
640	60	17420145	Netspot	Gallium Oxodotreotide Ga-68	Phaeochromocytoma	Nausea	Non-Serious	Non-Serious	Male	15-JAN-2020	14-FEB-2020	Expedited	Not Specified	81.6 KG	Aaa Pharma	Healthcare Professional	Not Specified	-	21-JAN-2020	14-FEB-2020	US	Not Specified	NVSC2020US016999	-	-
641	61	17408351	Netspot	Gallium Oxodotreotide Ga-68	Product Used For Unknown Indication	Rash;Flushing	Non-Serious	Non-Serious	Female	-	12-FEB-2020	Expedited	Not Specified	Not Specified	Aaa Pharma	Healthcare Professional	Not Specified	-	04-FEB-2020	12-FEB-2020	US	Not Specified	NVSC2020US034397	-	-
642	62	17313931	Netspot	Gallium Oxodotreotide Ga-68	Pancreatic Neuroendocrine Tumour	Nausea	Non-Serious	Non-Serious	Male	-	24-JAN-2020	Expedited	66 YR	Not Specified	Aaa Pharma	Healthcare Professional	Not Specified	-	21-JAN-2020	24-JAN-2020	US	Not Specified	NVSC2020US017056	-	-
643	63	17236940	Netspot	Gallium Oxodotreotide Ga-68	Product Used For Unknown Indication	Nausea;Burning Sensation	Non-Serious	Non-Serious	Male	-	06-JAN-2020	Expedited	17 YR	Not Specified	Aaa Pharma	Consumer	Not Specified	-	31-DEC-2019	06-JAN-2020	US	Not Specified	NVSC2019US084593	-	-
644	64	17214397	Netspot	Gallium Oxodotreotide Ga-68	Product Used For Unknown Indication	Nausea;Vomiting	Non-Serious	Non-Serious	Not Specified	-	30-DEC-2019	Expedited	Not Specified	Not Specified	Aaa Pharma	Healthcare Professional	Not Specified	-	24-DEC-2019	30-DEC-2019	US	Not Specified	NVSC2019US081193	-	-
645	65	17213210	Netspot	Gallium Oxodotreotide Ga-68	Neuroendocrine Carcinoma	Diarrhoea;Dizziness;Injection Site Pain;Vomiting;Flushing;Nausea	Non-Serious	Non-Serious	Female	-	30-DEC-2019	Expedited	Not Specified	72.74 KG	Aaa Pharma	Consumer	Not Specified	-	24-OCT-2019	30-DEC-2019	US	Not Specified	NVSC2019US017277	-	-
646	66	17202151	Netspot	Gallium Oxodotreotide Ga-68	Carcinoid Tumour	Scan Gallium Abnormal	Non-Serious	Non-Serious	Male	-	26-DEC-2019	Expedited	68 YR	Not Specified	Aaa Pharma	Consumer	Not Specified	-	12-NOV-2019	26-DEC-2019	US	Not Specified	NVSC2019US035781	-	-
647	67	17189367	Netspot	Gallium Oxodotreotide Ga-68	Neuroendocrine Tumour	Malaise;Salivary Hypersecretion;Hyperhidrosis;Nausea	Non-Serious	Non-Serious	Male	13-DEC-2018	23-DEC-2019	Expedited	41 YR	110.9 KG	Aaa Pharma	Healthcare Professional	Not Specified	-	16-DEC-2019	23-DEC-2019	US	Not Specified	NVSC2019US071547	-	-
648	68	17189363	Netspot;Saline	Sodium Chloride;Gallium Oxodotreotide Ga-68	Neuroendocrine Carcinoma;Product Used For Unknown Indication	Injection Site Pain;Abdominal Discomfort;Nausea	Non-Serious	Non-Serious	Female	04-DEC-2019	23-DEC-2019	Expedited	34 YR	Not Specified	Aaa Pharma	Healthcare Professional	Not Specified	-	04-DEC-2019	23-DEC-2019	US	Not Specified	NVSC2019US061028	-	-
649	69	17135385	Netspot	Gallium Oxodotreotide Ga-68	Positron Emission Tomogram;Small Intestine Carcinoma	Back Pain;Chest Pain;Abdominal Pain	Serious	Hospitalized	Not Specified	26-NOV-2019	10-DEC-2019	Expedited	71 YR	96.36 KG	Aaa Pharma	Consumer	Not Specified	Saline	27-NOV-2019	10-DEC-2019	US	Not Specified	NVSC2019US051077	-	-
650	70	17126919	Netspot	Gallium Oxodotreotide Ga-68	Product Used For Unknown Indication	Abdominal Discomfort;Feeling Abnormal	Non-Serious	Non-Serious	Male	-	09-DEC-2019	Expedited	Not Specified	Not Specified	Aaa Pharma	Consumer	Not Specified	-	22-NOV-2019	09-DEC-2019	US	Not Specified	NVSC2019US051622	-	-
651	71	17099224	Netspot	Gallium Oxodotreotide Ga-68	Positron Emission Tomogram	Chest Pain	Non-Serious	Non-Serious	Female	-	02-DEC-2019	Expedited	Not Specified	Not Specified	Aaa Pharma	Consumer	Not Specified	-	06-NOV-2019	02-DEC-2019	US	Not Specified	NVSC2019US033159	-	-
652	72	16923164	Netspot	Gallium Oxodotreotide Ga-68	Product Used For Unknown Indication	Vomiting;Cough	Non-Serious	Non-Serious	Male	-	02-DEC-2019	Expedited	73 YR	Not Specified	Aaa Pharma	Consumer	Not Specified	-	27-SEP-2019	16-OCT-2019	US	Not Specified	NVSC2019US000933	-	-
653	73	17031817	Netspot;Saline	Gallium Oxodotreotide Ga-68;Sodium Chloride	Product Used For Unknown Indication	Injection Site Discomfort;Injection Site Pain	Non-Serious	Non-Serious	Female	14-OCT-2019	14-NOV-2019	Expedited	59 YR	46.3 KG	Aaa Pharma	Healthcare Professional	Not Specified	-	17-OCT-2019	14-NOV-2019	US	Not Specified	NVSC2019US012937	-	-
654	74	17029916	Netspot	Gallium Oxodotreotide Ga-68	Scan	Infusion Site Pain	Non-Serious	Non-Serious	Male	15-OCT-2019	14-NOV-2019	Expedited	69 YR	83.9 KG	Aaa Pharma	Healthcare Professional	Not Specified	-	17-OCT-2019	14-NOV-2019	US	Not Specified	NVSC2019US013110	-	-
655	75	16677712	Netspot	Gallium Oxodotreotide Ga-68	Gastrinoma;Positron Emission Tomogram	Hyperhidrosis;Vomiting;Feeling Abnormal;Flushing;Tachycardia;Chills;Nausea;Anxiety	Non-Serious	Non-Serious	Female	14-MAY-2019	07-AUG-2019	Expedited	45 YR	76.8 KG	Advanced Accelerator Applications	Healthcare Professional	Not Specified	Omeprazole	03-JUN-2019	07-AUG-2019	US	Not Specified	US-ADAAP-201900194	-	-
656	76	16677638	Netspot	Gallium Oxodotreotide Ga-68	Positron Emission Tomogram	Vomiting	Non-Serious	Non-Serious	Female	16-MAY-2019	07-AUG-2019	Expedited	75 YR	Not Specified	Advanced Accelerator Applications	Healthcare Professional	Not Specified	-	05-JUN-2019	07-AUG-2019	US	Not Specified	US-AAA-201900187	-	-
657	77	16413938	Netspot	Gallium Oxodotreotide Ga-68	Positron Emission Tomogram	Chest Pain;Nausea;Muscle Spasms	Non-Serious	Non-Serious	Female	28-MAY-2019	11-JUN-2019	Expedited	Not Specified	Not Specified	Advanced Accelerator Applications	Healthcare Professional	Not Specified	-	29-MAY-2019	11-JUN-2019	US	Not Specified	US-ADAAP-201900123	-	-
658	78	16413931	Netspot	Gallium Oxodotreotide Ga-68	Positron Emission Tomogram	Scan Gallium Abnormal	Non-Serious	Non-Serious	Female	07-MAY-2019	11-JUN-2019	Expedited	67 YR	97.4 KG	Advanced Accelerator Applications	Healthcare Professional	Not Specified	-	07-MAY-2019	11-JUN-2019	US	Not Specified	US-ADAAP-201900100	-	-
659	79	16413905	Netspot	Gallium Oxodotreotide Ga-68	Positron Emission Tomogram	Injection Site Pain	Non-Serious	Non-Serious	Female	10-APR-2019	11-JUN-2019	Expedited	71 YR	43.1 KG	Advanced Accelerator Applications	Healthcare Professional	Not Specified	-	15-APR-2019	11-JUN-2019	US	Not Specified	US-ADAAP-201900079	-	-
660	80	16413879	Netspot	Gallium Oxodotreotide Ga-68	Positron Emission Tomogram	Scan Gallium Abnormal	Non-Serious	Non-Serious	Female	13-MAR-2019	11-JUN-2019	Expedited	60 YR	55.7 KG	Advanced Accelerator Applications	Healthcare Professional	Not Specified	-	14-MAR-2019	11-JUN-2019	US	Not Specified	US-ADAAP-201900068	-	-
661	81	16232601	-	Gallium Oxodotreotide Ga-68	Positron Emission Tomogram	Burning Sensation;Muscle Contractions Involuntary	Serious	Other Outcomes	Female	21-MAR-2019	24-APR-2019	Expedited	8 DEC	74.34 KG	Advanced Accelerator Applications	Healthcare Professional	Not Specified	-	13-APR-2019	24-APR-2019	US	Not Specified	US-ADAAP-201900072	-	-
662	82	16065400	Netspot	Gallium Oxodotreotide Ga-68	Gastrointestinal Scan;Positron Emission Tomogram	Nausea	Non-Serious	Non-Serious	Male	20-FEB-2019	13-MAR-2019	Expedited	6 DEC	118 KG	Advanced Accelerator Applications	Healthcare Professional	Not Specified	-	20-FEB-2019	13-MAR-2019	US	Not Specified	US-ADAAP-201900040	-	-
663	83	16065370	Netspot	Gallium Oxodotreotide Ga-68	Product Used For Unknown Indication	Product Distribution Issue;Poor Quality Product Administered	Non-Serious	Non-Serious	Not Specified	05-DEC-2018	13-MAR-2019	Non-Expedited	Not Specified	Not Specified	Advanced Accelerator Applications	Healthcare Professional	Not Specified	-	05-DEC-2018	13-MAR-2019	US	Not Specified	US-ADAAP-201800229	-	-
664	84	16065369	Netspot	Gallium Oxodotreotide Ga-68	Positron Emission Tomogram	Scan Gallium Abnormal	Non-Serious	Non-Serious	Male	-	13-MAR-2019	Expedited	59 YR	115.6 KG	Advanced Accelerator Applications	Healthcare Professional	Not Specified	-	27-DEC-2018	13-MAR-2019	US	Not Specified	US-ADAAP-201800240	-	-
665	85	16065368	-	Gallium Oxodotreotide Ga-68	Positron Emission Tomogram	Abdominal Pain	Non-Serious	Non-Serious	Female	25-JAN-2019	13-MAR-2019	Expedited	54 YR	95.2 KG	Advanced Accelerator Applications	Healthcare Professional	Not Specified	-	30-JAN-2019	13-MAR-2019	US	Not Specified	US-ADAAP-201900029	-	-
666	86	15722718	Netspot	Gallium Oxodotreotide Ga-68	Positron Emission Tomogram	Nausea;Pruritus;Erythema;Dark Circles Under Eyes;Skin Exfoliation;Skin Discolouration;Eye Swelling;Urticaria;Abdominal Discomfort;Fatigue	Non-Serious	Non-Serious	Female	25-APR-2018	14-DEC-2018	Expedited	46 YR	72.73 KG	Advanced Accelerator Applications	Healthcare Professional	Not Specified	-	27-NOV-2018	14-DEC-2018	US	Not Specified	US-ADAAP-201800213	-	-
667	87	15722717	Netspot	Gallium Oxodotreotide Ga-68	Positron Emission Tomogram	Product Use In Unapproved Indication	Non-Serious	Non-Serious	Female	-	14-DEC-2018	Non-Expedited	52 YR	Not Specified	Advanced Accelerator Applications	Healthcare Professional	Not Specified	-	22-OCT-2018	14-DEC-2018	US	Not Specified	US-ADAAP-201800201	Villanueva-Meyer JE, Magill ST, Lee JC, Umetsu SE, Flavell RR. Detection of metastatic meningioma to the liver using 68Ga-DOTA-Octreotate PET/CT. Clinical Nuclear Medicine. 2018-Sep;43(9):e338-e340.	-
668	88	15722716	Netspot	Gallium Oxodotreotide Ga-68	Positron Emission Tomogram	Scan Gallium Abnormal	Non-Serious	Non-Serious	Male	10-OCT-2018	14-DEC-2018	Non-Expedited	62 YR	65.8 KG	Advanced Accelerator Applications	Healthcare Professional	Not Specified	-	11-OCT-2018	14-DEC-2018	US	Not Specified	US-ADAAP-201800179	-	-
669	89	15722715	Netspot	Gallium Oxodotreotide Ga-68	Positron Emission Tomogram	Scan Gallium Abnormal	Non-Serious	Non-Serious	Male	03-OCT-2018	14-DEC-2018	Non-Expedited	Not Specified	86.36 KG	Advanced Accelerator Applications	Healthcare Professional	Not Specified	-	04-OCT-2018	14-DEC-2018	US	Not Specified	US-ADAAP-201800178	-	-
670	90	15722714	Netspot	Gallium Oxodotreotide Ga-68	Positron Emission Tomogram	Dizziness;Injection Site Pain;Erythema;Headache	Non-Serious	Non-Serious	Female	27-SEP-2018	14-DEC-2018	Non-Expedited	32 YR	48 KG	Advanced Accelerator Applications	Healthcare Professional	Not Specified	Levetiracetam;Gabapentin;Dexamethasone;Xeloda;Temodar	27-SEP-2018	14-DEC-2018	US	Not Specified	US-ADAAP-201800173	-	-
671	91	15722713	Netspot	Gallium Oxodotreotide Ga-68	Positron Emission Tomogram	Rash;Urticaria;Hypertension;Heart Rate Increased	Non-Serious	Non-Serious	Female	07-SEP-2018	14-DEC-2018	Non-Expedited	Not Specified	Not Specified	Advanced Accelerator Applications	Healthcare Professional	Not Specified	-	11-SEP-2018	14-DEC-2018	US	Not Specified	US-ADAAP-201800169	-	-
672	92	15722712	Netspot	Gallium Oxodotreotide Ga-68	Positron Emission Tomogram	Chest Pain;Nausea	Non-Serious	Non-Serious	Female	03-AUG-2018	14-DEC-2018	Expedited	63 YR	Not Specified	Advanced Accelerator Applications	Healthcare Professional	Not Specified	-	06-SEP-2018	14-DEC-2018	US	Not Specified	US-ADAAP-201800165	-	-
673	93	15685404	-	Gallium Oxodotreotide Ga-68	Positron Emission Tomogram	Muscular Weakness;Pain In Extremity	Serious	Disabled	Male	19-JUN-2018	04-DEC-2018	Expedited	56 YR	98 KG	Advanced Accelerator Applications	Healthcare Professional	Not Specified	-	19-JUL-2018	04-DEC-2018	US	Not Specified	US-ADAAP-201800132	-	-
674	94	15685401	Netspot	Gallium Oxodotreotide Ga-68	Positron Emission Tomogram;Product Used For Unknown Indication	Urticaria	Non-Serious	Non-Serious	Male	19-JAN-2018	04-DEC-2018	Non-Expedited	54 YR	91 KG	Advanced Accelerator Applications	Healthcare Professional	Not Specified	Cyclobenzaprine;Eszopiclone;Bupropion Hydrochloride;Fluoxetine;Atorvastatin;Albuterol	23-JAN-2018	04-DEC-2018	US	Not Specified	US-ADAAP-201800023	-	-
675	95	15685400	Netspot	Gallium Oxodotreotide Ga-68	Positron Emission Tomogram	Dysgeusia;Nausea	Non-Serious	Non-Serious	Female	23-JAN-2018	04-DEC-2018	Non-Expedited	66 YR	Not Specified	Advanced Accelerator Applications	Healthcare Professional	Not Specified	-	23-JAN-2018	04-DEC-2018	US	Not Specified	US-ADAAP-201800015	-	-
676	96	15685399	-	Gallium Oxodotreotide Ga-68	Positron Emission Tomogram;Product Used For Unknown Indication	Abdominal Pain	Non-Serious	Non-Serious	Female	28-DEC-2017	04-DEC-2018	Non-Expedited	69 YR	69.9 KG	Advanced Accelerator Applications	Healthcare Professional	Not Specified	Valium	29-DEC-2017	04-DEC-2018	US	Not Specified	US-ADAAP-201700316	-	-
677	97	15685398	-	Gallium Oxodotreotide Ga-68	Positron Emission Tomogram	Nausea	Non-Serious	Non-Serious	Female	21-DEC-2017	04-DEC-2018	Non-Expedited	57 YR	67.1 KG	Advanced Accelerator Applications	Healthcare Professional	Not Specified	-	22-DEC-2017	04-DEC-2018	US	Not Specified	US-ADAAP-201700315	-	-
678	98	15685397	-	Gallium Oxodotreotide Ga-68	Positron Emission Tomogram	Syringe Issue;Incorrect Dose Administered	Non-Serious	Non-Serious	Female	06-DEC-2017	04-DEC-2018	Non-Expedited	Not Specified	Not Specified	Advanced Accelerator Applications	Healthcare Professional	Not Specified	-	07-DEC-2017	04-DEC-2018	US	Not Specified	US-ADAAP-201700310	-	-
679	99	15685396	Omnipaque	Iohexol;Gallium Oxodotreotide Ga-68	Positron Emission Tomogram;Product Used For Unknown Indication;Scan With Contrast	Urticaria;Off Label Use;Erythema	Non-Serious	Non-Serious	Female	11-DEC-2017	04-DEC-2018	Expedited	32 YR	38 KG	Advanced Accelerator Applications	Healthcare Professional	Not Specified	Fluticasone Propionate;Gabapentin;Ferrous Sulfate;Acetaminophen;Levetiracetam	12-DEC-2017	04-DEC-2018	US	Not Specified	US-ADAAP-201700306	-	-
680	100	15685395	-	Gallium Oxodotreotide Ga-68	Positron Emission Tomogram	Dizziness;Chest Pain	Non-Serious	Non-Serious	Female	07-DEC-2017	04-DEC-2018	Non-Expedited	55 YR	Not Specified	Advanced Accelerator Applications	Healthcare Professional	Not Specified	-	11-DEC-2017	04-DEC-2018	US	Not Specified	US-ADAAP-201700302	-	-
681	101	15685394	Netspot	Gallium Oxodotreotide Ga-68	Positron Emission Tomogram;Product Used For Unknown Indication	Nausea	Non-Serious	Non-Serious	Male	20-NOV-2017	04-DEC-2018	Non-Expedited	42 YR	147 KG	Advanced Accelerator Applications	Healthcare Professional	Not Specified	Oxycontin;Fluoxetine;Tirosint;Sumatriptan;Lamotrigine;Phenoxybenzamine;Methocarbamol;Testosterone;Carvedilol	20-NOV-2017	04-DEC-2018	US	Not Specified	US-ADAAP-201700269	-	-
682	102	15685393	Netspot	Gallium Oxodotreotide Ga-68	Positron Emission Tomogram;Scan With Contrast	Nausea	Non-Serious	Non-Serious	Female	01-NOV-2017	04-DEC-2018	Non-Expedited	42 YR	89.4 KG	Advanced Accelerator Applications	Healthcare Professional	Not Specified	-	14-NOV-2017	04-DEC-2018	US	Not Specified	US-ADAAP-201700267	-	-
683	103	15685392	Netspot	Gallium Oxodotreotide Ga-68	Positron Emission Tomogram;Scan With Contrast	Nausea;Vomiting;Abdominal Pain Upper	Non-Serious	Non-Serious	Female	20-JUL-2017	04-DEC-2018	Non-Expedited	74 YR	73.5 KG	Advanced Accelerator Applications	Healthcare Professional	Not Specified	Barium	14-NOV-2017	04-DEC-2018	US	Not Specified	US-ADAAP-201700266	-	-
684	104	15685391	Netspot	Gallium Oxodotreotide Ga-68	Positron Emission Tomogram;Scan With Contrast	Accidental Underdose;Abdominal Pain Upper;Nausea;Vomiting	Non-Serious	Non-Serious	Male	17-JUL-2017	04-DEC-2018	Non-Expedited	53 YR	110.2 KG	Advanced Accelerator Applications	Healthcare Professional	Not Specified	Barium	14-NOV-2017	04-DEC-2018	US	Not Specified	US-ADAAP-201700265	-	-
685	105	15685390	Netspot	Gallium Oxodotreotide Ga-68	Positron Emission Tomogram;Scan With Contrast	Vomiting;Nausea	Non-Serious	Non-Serious	Male	28-JUN-2017	04-DEC-2018	Non-Expedited	46 YR	84 KG	Advanced Accelerator Applications	Healthcare Professional	Not Specified	Barium	14-NOV-2017	04-DEC-2018	US	Not Specified	US-ADAAP-201700264	-	-
686	106	15685389	Netspot	Gallium Oxodotreotide Ga-68	Positron Emission Tomogram	Abdominal Pain;Nausea	Non-Serious	Non-Serious	Female	04-OCT-2017	04-DEC-2018	Non-Expedited	58 YR	104.3 KG	Advanced Accelerator Applications	Healthcare Professional	Not Specified	-	14-NOV-2017	04-DEC-2018	US	Not Specified	US-ADAAP-201700263	-	-
687	107	15685388	Netspot	Gallium Oxodotreotide Ga-68	Positron Emission Tomogram	Abdominal Pain;Nausea	Non-Serious	Non-Serious	Male	04-OCT-2017	04-DEC-2018	Non-Expedited	67 YR	107.6 KG	Advanced Accelerator Applications	Healthcare Professional	Not Specified	-	14-NOV-2017	04-DEC-2018	US	Not Specified	US-ADAAP-201700262	-	-
688	108	15685387	Netspot	Gallium Oxodotreotide Ga-68	Positron Emission Tomogram;Product Used For Unknown Indication	Blood Pressure Increased;Dyspnoea;Flushing	Non-Serious	Non-Serious	Female	06-NOV-2017	04-DEC-2018	Non-Expedited	47 YR	75.9 KG	Advanced Accelerator Applications	Healthcare Professional	Not Specified	Zyrtec;Metoprolol;Hydralazine	09-NOV-2017	04-DEC-2018	US	Not Specified	US-ADAAP-201700257	-	-
689	109	15685386	Netspot	Gallium Oxodotreotide Ga-68	Positron Emission Tomogram	Abdominal Pain;Injection Site Pain	Serious	Hospitalized	Female	20-OCT-2017	04-DEC-2018	Expedited	46 YR	Not Specified	Advanced Accelerator Applications	Healthcare Professional	Not Specified	-	20-OCT-2017	04-DEC-2018	US	Not Specified	US-ADAAP-201700238	-	-
690	110	15685385	Netspot	Gallium Oxodotreotide Ga-68	Attention Deficit Hyperactivity Disorder;Hypersensitivity;Positron Emission Tomogram	Nausea	Non-Serious	Non-Serious	Male	10-JUL-2017	04-DEC-2018	Non-Expedited	27 YR	74 KG	Advanced Accelerator Applications	Healthcare Professional	Not Specified	Adderall;Dymista	10-JUL-2017	04-DEC-2018	US	Not Specified	US-ADAAP-201700171	-	-
691	111	15351523	-	Gallium Oxodotreotide Ga-68	Positron Emission Tomogram	Burning Sensation	Non-Serious	Non-Serious	Female	24-JUL-2018	04-DEC-2018	Non-Expedited	Not Specified	Not Specified	Advanced Accelerator Applications	Healthcare Professional	Not Specified	-	25-JUL-2018	05-SEP-2018	US	Not Specified	US-ADAAP-201800144	-	-
692	112	15351515	-	Gallium Oxodotreotide Ga-68	Positron Emission Tomogram;Product Used For Unknown Indication	Nausea	Non-Serious	Non-Serious	Female	09-JUL-2018	04-DEC-2018	Non-Expedited	63 YR	75 KG	Advanced Accelerator Applications	Healthcare Professional	Not Specified	Lanreotide Acetate	13-JUL-2018	05-SEP-2018	US	Not Specified	US-ADAAP-201800129	-	-
693	113	15351514	Netspot	Gallium Oxodotreotide Ga-68	Positron Emission Tomogram	Nausea	Non-Serious	Non-Serious	Male	22-JUN-2018	04-DEC-2018	Non-Expedited	72 YR	60 KG	Advanced Accelerator Applications	Healthcare Professional	Not Specified	-	13-JUL-2018	05-SEP-2018	US	Not Specified	US-ADAAP-201800124	-	-
694	114	15351513	-	Gallium Oxodotreotide Ga-68	Carcinoid Tumour;Positron Emission Tomogram	Nausea	Non-Serious	Non-Serious	Female	10-JUL-2018	04-DEC-2018	Non-Expedited	Not Specified	59 KG	Advanced Accelerator Applications	Healthcare Professional	Not Specified	Lanreotide Acetate	13-JUL-2018	05-SEP-2018	US	Not Specified	US-ADAAP-201800130	-	-
695	115	15351512	Netspot	Gallium Oxodotreotide Ga-68	Positron Emission Tomogram	Nausea;Vomiting	Non-Serious	Non-Serious	Female	14-FEB-2018	04-DEC-2018	Non-Expedited	44 YR	49 KG	Advanced Accelerator Applications	Healthcare Professional	Not Specified	-	17-AUG-2018	05-SEP-2018	US	Not Specified	US-ADAAP-201800149	-	-
696	116	15351509	-	Gallium Oxodotreotide Ga-68	Positron Emission Tomogram	Burning Sensation	Non-Serious	Non-Serious	Not Specified	24-JUL-2018	04-DEC-2018	Non-Expedited	Not Specified	Not Specified	Advanced Accelerator Applications	Healthcare Professional	Not Specified	-	25-JUL-2018	05-SEP-2018	US	Not Specified	US-ADAAP-201800143	-	-
697	117	15319885	Netspot	Gallium Oxodotreotide Ga-68	Positron Emission Tomogram	Hyperhidrosis;Vomiting;Nausea;Dizziness	Serious	Hospitalized	Female	15-AUG-2018	04-DEC-2018	Expedited	69 YR	75.4 KG	Advanced Accelerator Applications	Healthcare Professional	Not Specified	-	17-AUG-2018	27-AUG-2018	US	Not Specified	US-ADAAP-201800152	-	-
698	118	15010524	Netspot	Gallium Oxodotreotide Ga-68	Positron Emission Tomogram	Nausea;Accidental Underdose;Palpitations;Blood Pressure Increased;Heart Rate Increased	Non-Serious	Non-Serious	Male	16-APR-2018	04-DEC-2018	Non-Expedited	43 YR	100 KG	Advanced Accelerator Applications	Healthcare Professional	Not Specified	-	30-MAY-2018	14-JUN-2018	US	Not Specified	US-ADAAP-201800072	-	-
699	119	15010523	Netspot	Gallium Oxodotreotide Ga-68	Positron Emission Tomogram	Injection Site Pain	Non-Serious	Non-Serious	Female	14-MAR-2018	04-DEC-2018	Non-Expedited	35 YR	76.8 KG	Advanced Accelerator Applications	Healthcare Professional	Not Specified	-	15-MAR-2018	14-JUN-2018	US	Not Specified	US-ADAAP-201800044	-	-
700	120	15010522	-	Gallium Oxodotreotide Ga-68	Positron Emission Tomogram	Rash;Pruritus	Non-Serious	Non-Serious	Female	13-DEC-2017	04-DEC-2018	Expedited	36 YR	83.6 KG	Advanced Accelerator Applications	Healthcare Professional	Not Specified	-	30-MAY-2018	14-JUN-2018	US	Not Specified	US-ADAAP-201800100	-	-
701	121	15010521	Netspot	Gallium Oxodotreotide Ga-68	Positron Emission Tomogram;Product Used For Unknown Indication	Abdominal Pain	Non-Serious	Non-Serious	Male	30-JAN-2018	04-DEC-2018	Non-Expedited	42 YR	62.4 KG	Advanced Accelerator Applications	Healthcare Professional	Not Specified	Levothyroxine;Cabergoline;Pegvisomant	02-MAR-2018	14-JUN-2018	US	Not Specified	US-ADAAP-201800040	-	-
702	122	15010520	Netspot	Gallium Oxodotreotide Ga-68	Positron Emission Tomogram	Injection Site Pain	Non-Serious	Non-Serious	Female	28-FEB-2018	04-DEC-2018	Non-Expedited	27 YR	Not Specified	Advanced Accelerator Applications	Healthcare Professional	Not Specified	-	03-MAR-2018	14-JUN-2018	US	Not Specified	US-ADAAP-201800041	-	-
703	123	15010518	Netspot	Gallium Oxodotreotide Ga-68	Positron Emission Tomogram	Injection Site Pain	Non-Serious	Non-Serious	Female	27-FEB-2018	04-DEC-2018	Non-Expedited	71 YR	75.9 KG	Advanced Accelerator Applications	Healthcare Professional	Not Specified	-	02-MAR-2018	14-JUN-2018	US	Not Specified	US-ADAAP-201800039	-	-
704	124	15010517	Netspot	Gallium Oxodotreotide Ga-68	Positron Emission Tomogram	Injection Site Pain	Non-Serious	Non-Serious	Female	19-FEB-2018	04-DEC-2018	Non-Expedited	65 YR	Not Specified	Advanced Accelerator Applications	Healthcare Professional	Not Specified	-	02-MAR-2018	14-JUN-2018	US	Not Specified	US-ADAAP-201800037	-	-
705	125	15010516	Netspot	Gallium Oxodotreotide Ga-68	Positron Emission Tomogram	Injection Site Pain	Non-Serious	Non-Serious	Female	26-FEB-2018	04-DEC-2018	Non-Expedited	67 YR	Not Specified	Advanced Accelerator Applications	Healthcare Professional	Not Specified	-	02-MAR-2018	14-JUN-2018	US	Not Specified	US-ADAAP-201800038	-	-
706	126	15010515	Netspot	Gallium Oxodotreotide Ga-68	Positron Emission Tomogram	Injection Site Pain	Non-Serious	Non-Serious	Female	13-FEB-2018	04-DEC-2018	Non-Expedited	22 YR	61.8 KG	Advanced Accelerator Applications	Healthcare Professional	Not Specified	-	02-MAR-2018	14-JUN-2018	US	Not Specified	US-ADAAP-201800031	-	-
707	127	15582711	Netspot	Gallium Oxodotreotide Ga-68	Positron Emission Tomogram	Chest Discomfort;Muscle Tightness;Pain In Extremity	Serious	Other Outcomes	Male	-	05-NOV-2018	Expedited	Not Specified	Not Specified	Advanced Accelerator Applications	Healthcare Professional	Not Specified	-	25-OCT-2018	05-NOV-2018	US	Not Specified	US-ADAAP-201800184	-	-
708	128	15214884	Netspot	Gallium Oxodotreotide Ga-68	Positron Emission Tomogram	Pain In Extremity;Muscular Weakness	Serious	Disabled	Male	19-JUN-2018	30-JUL-2018	Expedited	56 YR	98 KG	Advanced Accelerator Applications	Healthcare Professional	Not Specified	-	19-JUL-2018	30-JUL-2018	US	Not Specified	US-AAA-201800132	-	-
709	129	15196170	Netspot	Gallium Oxodotreotide Ga-68	Carcinoid Tumour Of The Gastrointestinal Tract;Constipation;Positron Emission Tomogram;Type 2 Diabetes Mellitus	Feeling Cold;Nausea;Tremor;Sepsis;Tachycardia;Chills	Serious	Other Outcomes	Male	OCT-2017	25-JUL-2018	Non-Expedited	54 YR	82 KG	Advanced Accelerator Applications	Healthcare Professional	Not Specified	Octreotide;Butylscopolamine Bromide;Gliclazide;Actrapid;Insulin Glargine;Metformin	09-OCT-2017	25-JUL-2018	GB	Not Specified	GB-ADAAP-201700226	-	-
710	130	14664086	Netspot	Gallium Oxodotreotide Ga-68	Positron Emission Tomogram;Product Used For Unknown Indication	Nausea	Non-Serious	Non-Serious	Male	20-NOV-2017	21-MAR-2018	Non-Expedited	42 YR	147 KG	Aaa Pharma	Healthcare Professional	Not Specified	Fluoxetine;Testosterone;Methocarbamol;Lamotrigine;Sumatriptan;Phenoxybenzamine;Carvedilol;Oxycontin;Tirosint	20-NOV-2017	21-MAR-2018	US	Not Specified	US-AAA-201700269	-	-
711	131	14664085	Netspot	Gallium Oxodotreotide Ga-68	Positron Emission Tomogram;Scan With Contrast	Nausea	Non-Serious	Non-Serious	Female	01-NOV-2017	21-MAR-2018	Non-Expedited	42 YR	89.4 KG	Aaa Pharma	Healthcare Professional	Not Specified	-	14-NOV-2017	21-MAR-2018	US	Not Specified	US-AAA-201700267	-	-
712	132	14664084	Netspot	Gallium Oxodotreotide Ga-68	Positron Emission Tomogram;Scan With Contrast	Vomiting;Nausea;Abdominal Pain Upper	Non-Serious	Non-Serious	Female	20-JUL-2017	21-MAR-2018	Non-Expedited	74 YR	73.5 KG	Aaa Pharma	Healthcare Professional	Not Specified	Barium	14-NOV-2017	21-MAR-2018	US	Not Specified	US-AAA-201700266	-	-
713	133	14664082	Netspot	Gallium Oxodotreotide Ga-68	Positron Emission Tomogram;Scan With Contrast	Vomiting;Accidental Underdose;Abdominal Pain Upper;Nausea	Non-Serious	Non-Serious	Male	17-JUL-2017	21-MAR-2018	Expedited	53 YR	110.2 KG	Aaa Pharma	Healthcare Professional	Not Specified	Barium	14-NOV-2017	21-MAR-2018	US	Not Specified	US-AAA-201700265	-	-
714	134	14664081	Netspot	Gallium Oxodotreotide Ga-68	Positron Emission Tomogram;Scan With Contrast	Nausea;Vomiting	Non-Serious	Non-Serious	Male	28-JUN-2017	21-MAR-2018	Non-Expedited	46 YR	84 KG	Aaa Pharma	Healthcare Professional	Not Specified	Barium	14-NOV-2017	21-MAR-2018	US	Not Specified	US-AAA-201700264	-	-
715	135	14664080	Netspot	Gallium Oxodotreotide Ga-68	Positron Emission Tomogram	Abdominal Pain;Nausea	Non-Serious	Non-Serious	Female	04-OCT-2017	21-MAR-2018	Non-Expedited	58 YR	104.3 KG	Aaa Pharma	Healthcare Professional	Not Specified	-	14-NOV-2017	21-MAR-2018	US	Not Specified	US-AAA-201700263	-	-
716	136	14664079	Netspot	Gallium Oxodotreotide Ga-68	Positron Emission Tomogram	Abdominal Pain;Nausea	Non-Serious	Non-Serious	Male	04-OCT-2017	21-MAR-2018	Non-Expedited	67 YR	107.6 KG	Aaa Pharma	Healthcare Professional	Not Specified	-	14-NOV-2017	21-MAR-2018	US	Not Specified	US-AAA-201700262	-	-
717	137	14664078	Netspot	Gallium Oxodotreotide Ga-68	Positron Emission Tomogram;Product Used For Unknown Indication	Blood Pressure Increased;Dyspnoea;Flushing	Non-Serious	Non-Serious	Female	06-NOV-2017	21-MAR-2018	Non-Expedited	47 YR	75.9 KG	Aaa Pharma	Healthcare Professional	Not Specified	Metoprolol;Zyrtec;Hydralazine	09-NOV-2017	21-MAR-2018	US	Not Specified	US-AAA-201700257	-	-
718	138	14664077	Netspot	Gallium Oxodotreotide Ga-68	Positron Emission Tomogram	Vomiting;Nausea	Non-Serious	Non-Serious	Female	05-OCT-2017	21-MAR-2018	Non-Expedited	41 YR	63 KG	Aaa Pharma	Healthcare Professional	Not Specified	-	05-OCT-2017	21-MAR-2018	US	Not Specified	US-AAA-201700236	-	-
719	139	14664076	Netspot	Gallium Oxodotreotide Ga-68	Positron Emission Tomogram	Feeling Hot;Dysgeusia;Nausea	Non-Serious	Non-Serious	Female	30-AUG-2017	21-MAR-2018	Non-Expedited	26 YR	107.4 KG	Aaa Pharma	Healthcare Professional	Not Specified	-	30-AUG-2017	21-MAR-2018	US	Not Specified	US-AAA-201700200	-	-
720	140	14664075	Netspot	Gallium Oxodotreotide Ga-68	Positron Emission Tomogram	Scan Gallium Abnormal	Non-Serious	Non-Serious	Male	28-AUG-2017	21-MAR-2018	Non-Expedited	57 YR	Not Specified	Aaa Pharma	Healthcare Professional	Not Specified	-	29-AUG-2017	21-MAR-2018	US	Not Specified	US-AAA-201700199	-	-
721	141	14664074	Netspot	Gallium Oxodotreotide Ga-68	Carcinoid Tumour Of The Small Bowel;Nausea;Positron Emission Tomogram	Scan Gallium Abnormal	Non-Serious	Non-Serious	Male	23-AUG-2017	21-MAR-2018	Non-Expedited	61 YR	84.1 KG	Aaa Pharma	Healthcare Professional	Not Specified	Zofran;Lanreotide	23-AUG-2017	21-MAR-2018	US	Not Specified	US-AAA-201700197	-	-
722	142	14664073	Netspot	Gallium Oxodotreotide Ga-68	Hypothyroidism;Nutritional Supplementation;Positron Emission Tomogram;Radiation Sickness Syndrome	Scan Gallium Abnormal	Non-Serious	Non-Serious	Female	27-JUL-2017	21-MAR-2018	Non-Expedited	53 YR	50.7 KG	Aaa Pharma	Healthcare Professional	Not Specified	Levothyroxine;Dexamethasone;Vitamins	23-AUG-2017	21-MAR-2018	US	Not Specified	US-AAA-201700196	-	-
723	143	14664072	Netspot	Gallium Oxodotreotide Ga-68	Positron Emission Tomogram	Nausea;Feeling Abnormal	Non-Serious	Non-Serious	Not Specified	17-AUG-2017	21-MAR-2018	Non-Expedited	69 YR	66.2 KG	Aaa Pharma	Healthcare Professional	Not Specified	-	17-AUG-2017	21-MAR-2018	US	Not Specified	US-AAA-201700193	-	-
724	144	14664071	Netspot	Gallium Oxodotreotide Ga-68	Positron Emission Tomogram	Flushing;Dyspnoea;Pruritus;Chest Discomfort	Non-Serious	Non-Serious	Male	14-AUG-2017	21-MAR-2018	Non-Expedited	28 YR	83 KG	Aaa Pharma	Healthcare Professional	Not Specified	-	16-AUG-2017	21-MAR-2018	US	Not Specified	US-AAA-201700192	-	-
725	145	14664070	Netspot	Gallium Oxodotreotide Ga-68	Positron Emission Tomogram;Product Used For Unknown Indication	Infusion Site Pain;Chest Pain;Burning Sensation;Nausea	Non-Serious	Non-Serious	Female	28-JUL-2017	21-MAR-2018	Non-Expedited	50 YR	68 KG	Aaa Pharma	Healthcare Professional	Not Specified	Lorazepam;Progesterone;Choline Magnesium Trisalicylate;Curcuminoids;Fish Oil;Melatonin	28-JUL-2017	21-MAR-2018	US	Not Specified	US-AAA-201700177	-	-
726	146	14664069	Netspot	Gallium Oxodotreotide Ga-68	Positron Emission Tomogram	Nausea;Vomiting	Non-Serious	Non-Serious	Male	20-JUL-2017	21-MAR-2018	Non-Expedited	62 YR	86 KG	Aaa Pharma	Healthcare Professional	Not Specified	-	21-JUL-2017	21-MAR-2018	US	Not Specified	US-AAA-201700174	-	-
727	147	14664068	Netspot	Gallium Oxodotreotide Ga-68	Attention Deficit Hyperactivity Disorder;Hypersensitivity;Positron Emission Tomogram	Nausea	Non-Serious	Non-Serious	Male	10-JUL-2017	21-MAR-2018	Non-Expedited	27 YR	74 KG	Aaa Pharma	Healthcare Professional	Not Specified	Adderall;Dymista	10-JUL-2017	21-MAR-2018	US	Not Specified	US-AAA-201700171	-	-
728	148	14664067	Netspot	Gallium Oxodotreotide Ga-68	Positron Emission Tomogram	Nausea;Burning Sensation	Non-Serious	Non-Serious	Female	22-JUN-2017	21-MAR-2018	Non-Expedited	55 YR	58 KG	Aaa Pharma	Healthcare Professional	Not Specified	-	06-JUL-2017	21-MAR-2018	US	Not Specified	US-AAA-201700167	-	-
729	149	14664066	Netspot	Gallium Oxodotreotide Ga-68	Positron Emission Tomogram	Injection Site Pain;Nausea	Non-Serious	Non-Serious	Female	05-JUL-2017	21-MAR-2018	Non-Expedited	35 YR	86.6 KG	Aaa Pharma	Healthcare Professional	Not Specified	-	06-JUL-2017	21-MAR-2018	US	Not Specified	US-AAA-201700166	-	-
730	150	14664065	Netspot	Gallium Oxodotreotide Ga-68	Carcinoid Tumour Of The Small Bowel;Chronic Obstructive Pulmonary Disease;Depression;Erectile Dysfunction;Hypertension;Positron Emission Tomogram	Injection Site Pain;Flushing	Non-Serious	Non-Serious	Male	27-JUN-2017	21-MAR-2018	Non-Expedited	71 YR	81 KG	Aaa Pharma	Healthcare Professional	Not Specified	Octreotide Acetate;Sildenafil;Amlodipine;Paroxetine;Spiriva	05-JUL-2017	21-MAR-2018	US	Not Specified	US-AAA-201700165	-	-
731	151	14664064	Netspot	Gallium Oxodotreotide Ga-68	Hormone Replacement Therapy;Positron Emission Tomogram;Seizure	Nausea;Injection Site Pain	Non-Serious	Non-Serious	Female	30-JUN-2017	21-MAR-2018	Non-Expedited	59 YR	72 KG	Aaa Pharma	Healthcare Professional	Not Specified	Estradiol;Levetiracetam	05-JUL-2017	21-MAR-2018	US	Not Specified	US-AAA-201700163	-	-
732	152	14664063	Netspot	Gallium Oxodotreotide Ga-68	Calcium Deficiency;Hypertension;Hypertonic Bladder;Multiple Allergies;Positron Emission Tomogram;Vitamin D Deficiency	Nausea;Injection Site Pain	Non-Serious	Non-Serious	Female	03-JUL-2017	21-MAR-2018	Non-Expedited	69 YR	112 KG	Aaa Pharma	Healthcare Professional	Not Specified	Oxybutynin.;Vitamin D3;Zyrtec;Doxazosin;Calcium Gluconate;Metoprolol	05-JUL-2017	21-MAR-2018	US	Not Specified	US-AAA-201700162	-	-
733	153	14664062	Netspot	Gallium Oxodotreotide Ga-68	Positron Emission Tomogram	Nausea;Injection Site Pain	Non-Serious	Non-Serious	Female	27-JUN-2017	21-MAR-2018	Non-Expedited	57 YR	Not Specified	Aaa Pharma	Healthcare Professional	Not Specified	-	28-JUN-2017	21-MAR-2018	US	Not Specified	US-AAA-201700161	-	-
734	154	14664061	Netspot	Gallium Oxodotreotide Ga-68	Positron Emission Tomogram	Nausea	Non-Serious	Non-Serious	Female	23-JUN-2017	21-MAR-2018	Non-Expedited	63 YR	Not Specified	Aaa Pharma	Healthcare Professional	Not Specified	-	28-JUN-2017	21-MAR-2018	US	Not Specified	US-AAA-201700160	-	-
735	155	14664060	Netspot	Gallium Oxodotreotide Ga-68	Positron Emission Tomogram	Abdominal Pain;Nausea;Injection Site Pain	Non-Serious	Non-Serious	Female	26-JUN-2017	21-MAR-2018	Non-Expedited	57 YR	Not Specified	Aaa Pharma	Healthcare Professional	Not Specified	-	28-JUN-2017	21-MAR-2018	US	Not Specified	US-AAA-201700159	-	-
736	156	14664059	Netspot	Gallium Oxodotreotide Ga-68	Positron Emission Tomogram	Nausea	Non-Serious	Non-Serious	Female	21-JUN-2017	21-MAR-2018	Non-Expedited	42 YR	108.9 KG	Aaa Pharma	Healthcare Professional	Not Specified	-	23-JUN-2017	21-MAR-2018	US	Not Specified	US-AAA-201700153	-	-
737	157	14664057	Netspot	Gallium Oxodotreotide Ga-68	Positron Emission Tomogram;Product Used For Unknown Indication	Nausea;Chest Discomfort;Administration Site Pain	Non-Serious	Non-Serious	Female	31-MAY-2017	21-MAR-2018	Non-Expedited	38 YR	Not Specified	Aaa Pharma	Healthcare Professional	Not Specified	Vitamin D Nos;Flonase;Hydroxychloroquine;Flovent;Levothyroxine	14-JUN-2017	21-MAR-2018	US	Not Specified	US-AAA-201700152	-	-
738	158	14664056	Netspot	Gallium Oxodotreotide Ga-68	Positron Emission Tomogram	Vomiting;Nausea	Non-Serious	Non-Serious	Female	21-JUN-2017	21-MAR-2018	Non-Expedited	52 YR	60.3 KG	Aaa Pharma	Consumer	Not Specified	-	21-JUN-2017	21-MAR-2018	US	Not Specified	US-AAA-201700151	-	-
739	159	14664055	Netspot	Gallium Oxodotreotide Ga-68	Positron Emission Tomogram	Nausea	Non-Serious	Non-Serious	Male	09-JUN-2017	21-MAR-2018	Non-Expedited	63 YR	Not Specified	Aaa Pharma	Healthcare Professional	Not Specified	-	14-JUN-2017	21-MAR-2018	US	Not Specified	US-AAA-201700150	-	-
740	160	14664054	Netspot	Gallium Oxodotreotide Ga-68	Positron Emission Tomogram	Scan Gallium Abnormal	Non-Serious	Non-Serious	Female	12-MAY-2017	21-MAR-2018	Non-Expedited	61 YR	80.3 KG	Aaa Pharma	Healthcare Professional	Not Specified	-	12-MAY-2017	21-MAR-2018	US	Not Specified	US-AAA-201700133	-	-
741	161	14664053	Netspot	Gallium Oxodotreotide Ga-68	Gastrooesophageal Reflux Disease;Hypercholesterolaemia;Hypertension;Neuralgia;Positron Emission Tomogram	Sneezing;Dyspnoea;Paraesthesia;Tinnitus;Hypersensitivity;Paraesthesia Oral;Rash;Nausea;Headache	Non-Serious	Non-Serious	Male	08-MAY-2017	21-MAR-2018	Non-Expedited	40 YR	90 KG	Aaa Pharma	Healthcare Professional	Not Specified	Gabapentin;Carvedilol;Omeprazole;Losartan;Atorvastatin	08-MAY-2017	21-MAR-2018	US	Not Specified	US-AAA-201700098	-	-
742	162	14664052	Netspot	Gallium Oxodotreotide Ga-68	Positron Emission Tomogram	Erythema	Non-Serious	Non-Serious	Female	01-MAY-2017	21-MAR-2018	Non-Expedited	17 YR	71.7 KG	Aaa Pharma	Healthcare Professional	Not Specified	-	01-MAY-2017	21-MAR-2018	US	Not Specified	US-AAA-201700096	-	-
743	163	14664051	Netspot	Gallium Oxodotreotide Ga-68	Positron Emission Tomogram	Therapy Non-Responder;Scan Gallium Abnormal;Product Quality Issue	Non-Serious	Non-Serious	Male	21-MAR-2017	21-MAR-2018	Non-Expedited	60 YR	108 KG	Aaa Pharma	Healthcare Professional	Not Specified	-	10-APR-2017	21-MAR-2018	US	Not Specified	US-AAA-201700093	-	-
744	164	14664050	Netspot	Gallium Oxodotreotide Ga-68	Blood Cholesterol Increased;Diabetes Mellitus;Essential Hypertension;Positron Emission Tomogram	Scan Gallium Abnormal;Diarrhoea	Non-Serious	Non-Serious	Female	05-APR-2017	21-MAR-2018	Non-Expedited	65 YR	Not Specified	Aaa Pharma	Healthcare Professional	Not Specified	Invokana;Cozaar;Glucotrol;Simvastatin;Metformin Hydrochloride	07-APR-2017	21-MAR-2018	US	Not Specified	US-AAA-201700092	-	-
745	165	14664049	Netspot	Gallium Oxodotreotide Ga-68	Positron Emission Tomogram;Product Used For Unknown Indication	Radiation Overdose;Vomiting	Non-Serious	Non-Serious	Female	24-MAR-2017	21-MAR-2018	Non-Expedited	68 YR	73 KG	Aaa Pharma	Healthcare Professional	Not Specified	Atenolol;Ondansetron;Levothyroxine;Omeprazole	04-APR-2017	21-MAR-2018	US	Not Specified	US-AAA-201700076	-	-
746	166	14664048	Netspot	Gallium Oxodotreotide Ga-68	Diarrhoea;Gastrinoma;Pain;Positron Emission Tomogram;Product Used For Unknown Indication;Respiratory Depression;Vitamin D Deficiency	Radiation Overdose;Nausea;Vomiting	Non-Serious	Non-Serious	Female	01-MAR-2017	21-MAR-2018	Non-Expedited	50 YR	77 KG	Aaa Pharma	Healthcare Professional	Not Specified	Loperamide;Nortriptyline;Morphine;Mirtazapine;Sandostatin;Lansoprazole;Drisdol;Lomotil;Naloxone	04-APR-2017	21-MAR-2018	US	Not Specified	US-AAA-201700075	-	-
747	167	14664047	Netspot	Gallium Oxodotreotide Ga-68	Positron Emission Tomogram	Burning Sensation;Scan Gallium Abnormal	Non-Serious	Non-Serious	Male	20-MAR-2017	21-MAR-2018	Non-Expedited	64 YR	62.5 KG	Aaa Pharma	Healthcare Professional	Not Specified	-	20-MAR-2017	21-MAR-2018	US	Not Specified	US-AAA-201700034	-	-
748	168	14664046	Netspot	Gallium Oxodotreotide Ga-68	Positron Emission Tomogram;Product Used For Unknown Indication	Scan Gallium Abnormal;Burning Sensation	Non-Serious	Non-Serious	Female	20-MAR-2017	21-MAR-2018	Non-Expedited	69 YR	67.5 KG	Aaa Pharma	Healthcare Professional	Not Specified	Erythromycin;Codeine;Clindamycin Hydrochloride;Keflex;Ampicillin;Levaquin;Penicillin;Ciprofloxacin;Bactrim;Natural Latex Rubber;Tetracycline	20-MAR-2017	21-MAR-2018	US	Not Specified	US-AAA-201700033	-	-
749	169	14664045	Netspot	Gallium Oxodotreotide Ga-68	Positron Emission Tomogram;Product Used For Unknown Indication	Post Procedural Diarrhoea;Radiation Overdose;Nausea;Hyperhidrosis;Feeling Abnormal;Heart Rate Increased	Non-Serious	Non-Serious	Female	14-MAR-2017	21-MAR-2018	Non-Expedited	38 YR	Not Specified	Aaa Pharma	Healthcare Professional	Not Specified	Somatostatin	14-MAR-2017	21-MAR-2018	US	Not Specified	US-AAA-201700030	-	-
750	170	14664044	Netspot	Gallium Oxodotreotide Ga-68	Positron Emission Tomogram	Pain;Nausea	Non-Serious	Non-Serious	Not Specified	21-FEB-2018	21-MAR-2018	Non-Expedited	Not Specified	Not Specified	Advanced Accelerator Applications	Healthcare Professional	Not Specified	-	25-FEB-2018	21-MAR-2018	US	Not Specified	US-AAA-201800034	-	-
751	171	14664043	Netspot	Gallium Oxodotreotide Ga-68	Positron Emission Tomogram;Product Used For Unknown Indication	Urticaria	Non-Serious	Non-Serious	Male	19-JAN-2018	21-MAR-2018	Non-Expedited	54 YR	91 KG	Aaa Pharma	Healthcare Professional	Not Specified	Bupropion Hydrochloride;Atorvastatin;Fluoxetine;Eszopiclone;Albuterol;Cyclobenzaprine	23-JAN-2018	21-MAR-2018	US	Not Specified	US-AAA-201800023	-	-
752	172	14664042	Netspot	Gallium Oxodotreotide Ga-68	Positron Emission Tomogram	Nausea;Dysgeusia	Non-Serious	Non-Serious	Female	23-JAN-2018	21-MAR-2018	Expedited	66 YR	Not Specified	Aaa Pharma	Healthcare Professional	Not Specified	-	23-JAN-2018	21-MAR-2018	US	Not Specified	US-AAA-201800015	-	-
753	173	14664041	Netspot	Gallium Oxodotreotide Ga-68	Positron Emission Tomogram;Product Used For Unknown Indication	Abdominal Pain	Non-Serious	Non-Serious	Female	28-DEC-2017	21-MAR-2018	Non-Expedited	69 YR	69.9 KG	Aaa Pharma	Healthcare Professional	Not Specified	Valium	29-DEC-2017	21-MAR-2018	US	Not Specified	US-AAA-201700316	-	-
754	174	14664040	Netspot	Gallium Oxodotreotide Ga-68	Positron Emission Tomogram	Nausea	Non-Serious	Non-Serious	Female	21-DEC-2017	21-MAR-2018	Non-Expedited	57 YR	67.1 KG	Aaa Pharma	Healthcare Professional	Not Specified	-	22-DEC-2017	21-MAR-2018	US	Not Specified	US-AAA-201700315	-	-
755	175	14664039	-	Gallium Oxodotreotide Ga-68	Positron Emission Tomogram	Incorrect Dose Administered;Syringe Issue	Non-Serious	Non-Serious	Female	06-DEC-2017	21-MAR-2018	Non-Expedited	Not Specified	Not Specified	Aaa Pharma	Healthcare Professional	Not Specified	-	07-DEC-2017	21-MAR-2018	US	Not Specified	US-AAA-201700310	-	-
756	176	14664038	Omnipaque	Iohexol;Gallium Oxodotreotide Ga-68	Positron Emission Tomogram;Product Used For Unknown Indication;Scan With Contrast	Urticaria;Erythema;Off Label Use	Non-Serious	Non-Serious	Female	11-DEC-2017	21-MAR-2018	Non-Expedited	32 YR	38 KG	Aaa Pharma	Healthcare Professional	Not Specified	Acetaminophen;Ferrous Sulfate;Fluticasone Propionate;Gabapentin;Levetiracetam	12-DEC-2017	21-MAR-2018	US	Not Specified	US-AAA-201700306	-	-
757	177	14664037	Netspot	Gallium Oxodotreotide Ga-68	Positron Emission Tomogram	Refusal Of Treatment By Patient;Dizziness;Chest Pain	Non-Serious	Non-Serious	Female	07-DEC-2017	21-MAR-2018	Non-Expedited	55 YR	Not Specified	Aaa Pharma	Healthcare Professional	Not Specified	-	11-DEC-2017	21-MAR-2018	US	Not Specified	US-AAA-201700302	-	-
758	178	14629988	Netspot	Gallium Oxodotreotide Ga-68	Positron Emission Tomogram	Pruritus;Erythema;Urticaria;Skin Irritation;Skin Swelling;Hypersensitivity	Serious	Other Outcomes	Female	07-MAR-2018	13-MAR-2018	Expedited	55 YR	55.9 KG	Aaa Pharma	Healthcare Professional	Not Specified	-	07-MAR-2018	13-MAR-2018	US	Not Specified	US-AAA-201800042	-	-
759	179	14155759	Netspot	Gallium Oxodotreotide Ga-68	Positron Emission Tomogram	Injection Site Pain;Abdominal Pain	Serious	Hospitalized	Female	20-OCT-2017	03-NOV-2017	Expedited	46 YR	Not Specified	Aaa Pharma	Healthcare Professional	Not Specified	-	20-OCT-2017	03-NOV-2017	US	Not Specified	US-AAA-201700238	-	-
760	180	13531729	Netspot	Gallium Oxodotreotide Ga-68	Imaging Procedure;Neuroendocrine Tumour	Headache;Paraesthesia Oral;Tinnitus;Sneezing;Anaphylactic Reaction;Nausea	Serious	Other Outcomes	Male	08-MAY-2017	10-MAY-2017	Direct	40 YR	90 KG	Fda-Ctu	Not Specified	Not Specified	-	-	10-MAY-2017	US	Y	-	-	Yes
761	181	13154645	Netspot	Gallium Oxodotreotide Ga-68	Imaging Procedure	Contrast Media Reaction;Vomiting;Flushing;Headache;Nausea	Non-Serious	Non-Serious	Female	23-JAN-2017	24-JAN-2017	Direct	50 YR	Not Specified	Fda-Ctu	Healthcare Professional	Health Professional	-	-	24-JAN-2017	US	Y	-	-	-
762	182	13154640	Netspot	Gallium Oxodotreotide Ga-68	Imaging Procedure	Contrast Media Reaction;Nausea;Vomiting	Non-Serious	Non-Serious	Male	03-JAN-2017	24-JAN-2017	Direct	52 YR	Not Specified	Fda-Ctu	Healthcare Professional	Health Professional	-	-	24-JAN-2017	US	Y	-	-	-
763	183	13154582	Netspot	Gallium Oxodotreotide Ga-68	Imaging Procedure	Nausea;Flushing;Contrast Media Reaction	Non-Serious	Non-Serious	Male	09-JAN-2017	24-JAN-2017	Direct	68 YR	Not Specified	Fda-Ctu	Healthcare Professional	Health Professional	-	-	24-JAN-2017	US	Y	-	-	-
764	1	24370583	Eligard	Leuprolide Acetate;Gallium Ga-68 Gozetotide	Hormone-Dependent Prostate Cancer;Product Used For Unknown Indication;Prostate Cancer	Hot Flush	Non-Serious	Non-Serious	Male	28-DEC-2022	23-DEC-2024	Non-Expedited	74 YR	96.6 KG	Tolmar	Healthcare Professional	Not Specified	Abiraterone;Oxycodone;Irbesartan;Lidocaine;Toujeo;Metformin;Hydrocodone;Pravastatin;Fenofibrate;Hydrochlorothiazide;Travoprost;Januvia;Systane (Hypromellose 2910 (4000 Mpa.S));Cannabis Sativa Subsp. Indica Top;Prednisone	25-NOV-2024	27-SEP-2024	US	Not Specified	US-TOLMAR, INC.-24US052467	-	-
765	2	24110796	Nubeqa;Illuccix	Gallium Ga-68 Gozetotide;Darolutamide;Relugolix;Lutetium Lu-177 Vipivotide Tetraxetan	Hormone-Dependent Prostate Cancer	Femur Fracture;Fall;Muscular Weakness	Serious	Hospitalized;Other Outcomes	Male	08-MAY-2024	06-DEC-2024	Expedited	68 YR	100 KG	Bayer	Healthcare Professional	Not Specified	Hydrochlorothiazide;Ibandronate Sodium;Metformin;Rosuvastatin;Jardiance;Irbesartan	02-DEC-2024	18-JUL-2024	US	Not Specified	US-BAYER-2024A101189	-	-
766	3	24624837	Illuccix	Gallium Ga-68 Gozetotide	Imaging Procedure	Burning Sensation	Non-Serious	Non-Serious	Not Specified	-	04-DEC-2024	Non-Expedited	Not Specified	Not Specified	Telix Pharmaceuticals	Healthcare Professional	Not Specified	-	10-OCT-2024	15-NOV-2024	US	Not Specified	US-TLX-2024000203	-	-
767	4	24624834	Illuccix	Gallium Ga-68 Gozetotide	Imaging Procedure	Injection Site Pain	Non-Serious	Non-Serious	Male	16-SEP-2024	04-DEC-2024	Non-Expedited	64 YR	Not Specified	Telix Pharmaceuticals	Healthcare Professional	Not Specified	-	16-SEP-2024	15-NOV-2024	US	Not Specified	US-TLX-2024000188	-	-
768	5	24624840	Illuccix	Gallium Ga-68 Gozetotide	Imaging Procedure	Burning Sensation	Non-Serious	Non-Serious	Not Specified	-	15-NOV-2024	Non-Expedited	Not Specified	Not Specified	Telix Pharmaceuticals	Healthcare Professional	Not Specified	-	10-OCT-2024	15-NOV-2024	US	Not Specified	US-TLX-2024000205	-	-
769	6	24624839	Illuccix	Gallium Ga-68 Gozetotide	Imaging Procedure	Burning Sensation	Non-Serious	Non-Serious	Not Specified	-	15-NOV-2024	Non-Expedited	Not Specified	Not Specified	Telix Pharmaceuticals	Healthcare Professional	Not Specified	-	10-OCT-2024	15-NOV-2024	US	Not Specified	US-TLX-2024000204	-	-
770	7	24624836	Illuccix	Gallium Ga-68 Gozetotide	Imaging Procedure	Burning Sensation	Non-Serious	Non-Serious	Not Specified	-	15-NOV-2024	Non-Expedited	Not Specified	Not Specified	Telix Pharmaceuticals	Healthcare Professional	Not Specified	-	10-OCT-2024	15-NOV-2024	US	Not Specified	US-TLX-2024000202	-	-
771	8	24624835	-	Gozetotide	Imaging Procedure	Hypersensitivity	Non-Serious	Non-Serious	Male	-	15-NOV-2024	Non-Expedited	Not Specified	Not Specified	Telix Pharmaceuticals	Consumer	Not Specified	-	30-SEP-2024	15-NOV-2024	US	Not Specified	US-TLX-2024000199	-	-
772	9	24624833	Illuccix	Gallium Ga-68 Gozetotide	Imaging Procedure	Injection Site Pain	Non-Serious	Non-Serious	Male	26-AUG-2024	15-NOV-2024	Non-Expedited	84 YR	83.9 KG	Telix Pharmaceuticals	Healthcare Professional	Not Specified	-	12-SEP-2024	15-NOV-2024	US	Not Specified	US-TLX-2024000187	-	-
773	10	24624832	Illuccix	Gallium Ga-68 Gozetotide	Prostate Cancer	Injection Site Pain	Non-Serious	Non-Serious	Male	27-AUG-2024	15-NOV-2024	Non-Expedited	66 YR	83.9 KG	Telix Pharmaceuticals	Healthcare Professional	Not Specified	-	27-AUG-2024	15-NOV-2024	US	Not Specified	US-TLX-2024000184	-	-
774	11	24624831	Illuccix	Gallium Ga-68 Gozetotide	Imaging Procedure	Injection Site Pain	Non-Serious	Non-Serious	Male	28-AUG-2024	15-NOV-2024	Non-Expedited	80 YR	68.5 KG	Telix Pharmaceuticals	Healthcare Professional	Not Specified	-	12-SEP-2024	15-NOV-2024	US	Not Specified	US-TLX-2024000186	-	-
775	12	24624830	Illuccix	Gallium Ga-68 Gozetotide	Imaging Procedure	Burning Sensation	Non-Serious	Non-Serious	Male	AUG-2024	15-NOV-2024	Non-Expedited	Not Specified	Not Specified	Telix Pharmaceuticals	Healthcare Professional	Not Specified	-	26-AUG-2024	15-NOV-2024	US	Not Specified	US-TLX-2024000183	-	-
776	13	24624829	Illuccix	Gallium Ga-68 Gozetotide	Imaging Procedure	Injection Site Pain	Non-Serious	Non-Serious	Male	08-AUG-2024	15-NOV-2024	Non-Expedited	64 YR	104.32 KG	Telix Pharmaceuticals	Healthcare Professional	Not Specified	-	08-AUG-2024	15-NOV-2024	US	Not Specified	US-TLX-2024000178	-	-
777	14	24624828	Illuccix	Gallium Ga-68 Gozetotide	Imaging Procedure	Micturition Urgency	Non-Serious	Non-Serious	Male	21-AUG-2024	15-NOV-2024	Non-Expedited	61 YR	88 KG	Telix Pharmaceuticals	Healthcare Professional	Not Specified	-	21-AUG-2024	15-NOV-2024	US	Not Specified	US-TLX-2024000182	-	-
778	15	24624827	Illuccix	Gallium Ga-68 Gozetotide	Imaging Procedure	Injection Site Pain	Non-Serious	Non-Serious	Male	01-AUG-2024	15-NOV-2024	Non-Expedited	Not Specified	Not Specified	Telix Pharmaceuticals	Healthcare Professional	Not Specified	-	01-AUG-2024	15-NOV-2024	US	Not Specified	US-TLX-2024000177	-	-
779	16	24624826	Illuccix	Gallium Ga-68 Gozetotide	Imaging Procedure	Injection Site Pain	Non-Serious	Non-Serious	Male	01-AUG-2024	15-NOV-2024	Non-Expedited	Not Specified	Not Specified	Telix Pharmaceuticals	Healthcare Professional	Not Specified	-	01-AUG-2024	15-NOV-2024	US	Not Specified	US-TLX-2024000176	-	-
780	17	23435520	Eligard	Leuprolide Acetate;Apalutamide;Gallium Ga-68 Gozetotide;Lutetium Lu-177 Vipivotide Tetraxetan	Product Used For Unknown Indication;Prostate Cancer	Angina Pectoris	Serious	Hospitalized	Male	11-JAN-2024	07-OCT-2024	Non-Expedited	67 YR	103.1 KG	Tolmar	Healthcare Professional	Not Specified	Metoprolol Succinate;Zinc Methionine Sulfate;Furosemide;Bicalutamide;Aspirin;Mycelex;Rosuvastatin;Tamsulosin Hydrochloride;Cholecalciferol;Prednisone;Nitroglycerin;Ascorbic Acid;Spironolactone;Lidocaine Hydrochloride;Lisinopril;Acetaminophen;Vitamin E;Abiraterone	11-SEP-2024	24-JAN-2024	US	Not Specified	US-TOLMAR, INC.-24US046153	-	-
781	18	22972215	-	Lutetium Lu-177 Vipivotide Tetraxetan;Amiodarone;Gallium Ga-68 Gozetotide	Atrial Fibrillation;Hormone-Dependent Prostate Cancer	Acute Respiratory Distress Syndrome;Pneumonia	Serious	Hospitalized;Life Threatening;Other Outcomes	Male	06-MAY-2023	26-SEP-2024	Expedited	77 YR	78 KG	Mylan	Healthcare Professional	Not Specified	Vitamin B Complex;Dextrose;Xarelto;Hydrocortisone;Calcium Carbonate\Cholecalciferol;Duphalac;Degarelix;Norepinephrine Bitartrate;Propofol;Prednisone;Fenofibrate;Zopiclone;Fresubin;Fungizone;Vitamin B1;Cholecalciferol;Triptorelin;Abiraterone	24-SEP-2024	22-SEP-2023	FR	Not Specified	FR-MYLANLABS-2023M1099474	-	-
782	19	22856450	Cordarone	Amiodarone Hydrochloride;Lutetium Lu-177 Vipivotide Tetraxetan;Gallium Ga-68 Gozetotide;Amiodarone Hydrochloride	Atrial Fibrillation;Hormone-Dependent Prostate Cancer;Product Used For Unknown Indication;Prophylaxis	Pneumonia;Acute Respiratory Distress Syndrome	Serious	Hospitalized;Life Threatening;Other Outcomes	Male	06-MAY-2023	19-SEP-2024	Expedited	77 YR	78 KG	Novartis	Healthcare Professional	Not Specified	Norepinephrine;Triptorelin;Propofol;Duphalac;Abiraterone;Fungizone;Zopiclone;Fenofibrate;Fresubin;Dextrose;Xarelto;Hydrocortisone;Calcium Carbonate\Cholecalciferol;Cholecalciferol;Prednisone;Vitamin B1;Degarelix	19-SEP-2024	23-AUG-2023	FR	Not Specified	NVSC2023FR180676	-	-
783	20	23322776	Crestor	Rosuvastatin Calcium;Lutetium Lu-177 Vipivotide Tetraxetan;Gallium Ga-68 Gozetotide	Hormone-Dependent Prostate Cancer;Hyperlipidaemia	Diarrhoea;Osteoporosis;Hypoxia;Insomnia;Cataract;Muscular Weakness;Hypokalaemia;Sciatica;Chronic Kidney Disease;Bundle Branch Block Right;Umbilical Hernia;Hypophosphataemia;Pain In Extremity;Constipation;Erectile Dysfunction;Asthenia;Glucose Tolerance Impaired;Hot Flush;Haemoptysis;Hypertension;Blood Creatine Phosphokinase Increased;Gastrooesophageal Reflux Disease;Gout;Idiopathic Pulmonary Fibro…	Serious	Hospitalized;Other Outcomes;Died	Male	13-NOV-2023	11-SEP-2024	Expedited	77 YR	77.5 KG	Astrazeneca	Healthcare Professional	Not Specified	Vitamin D3;Psyllium;Allopurinol;Phosphorus;Lomotil;Calcium;Melatonin;K Phos Neutral;Vitamin B2;Opium Tincture;Ofev;Prednisone;Klor-Con;Venlafaxine;Senokot;Abiraterone;Tylenol;Coenzyme Q10;Flonase;Leuprolide Acetate;Aspirin;Miralax	06-SEP-2024	20-DEC-2023	Not Specified	Not Specified	US-AstraZeneca-2023A288644	-	-
784	21	22208217	Zytiga;Gallium Ga-68 Psma-11;Tylenol	Acetaminophen;Gallium Ga-68 Gozetotide;Abiraterone Acetate;Lutetium Lu-177 Vipivotide Tetraxetan;Ibuprofen	Hormone-Dependent Prostate Cancer;Pain;Product Used For Unknown Indication;Sciatica	Intentional Overdose;Liver Injury	Serious	Other Outcomes	Male	16-MAR-2023	09-SEP-2024	Expedited	66 YR	83.7 KG	Johnson And Johnson	Healthcare Professional	Not Specified	Fluticasone;Leuprolide Acetate;Zolpidem;Methylprednisolone;Mupirocin;Morphine;Omeprazole;Pregabalin;Tadalafil;Ondansetron;Oxycodone;Cannabis Sativa Subsp. Indica Top;Fluorouracil;Prednisone	04-SEP-2024	13-APR-2023	US	Not Specified	US-JNJFOC-20230405319	-	-
785	22	24182275	Illuccix	Gallium Ga-68 Gozetotide	Hyperlipidaemia;Imaging Procedure;Product Used For Unknown Indication	Back Pain	Non-Serious	Non-Serious	Male	18-JUL-2024	07-AUG-2024	Non-Expedited	74 YR	93.44 KG	Telix Pharmaceuticals	Consumer	Not Specified	Meloxicam;Vitamin D3;Tylenol;Xtandi;Erleada;Amlodipine Besylate;Childrens Chewable Aspirin;Atorvastatin Calcium;Losartan Potassium;Niacin	18-JUL-2024	07-AUG-2024	US	Not Specified	US-TLX-2024000175	-	-
786	23	24182274	Illuccix	Gallium Ga-68 Gozetotide	Imaging Procedure	Injection Site Discomfort;Injection Site Pain	Non-Serious	Non-Serious	Male	10-JUL-2024	07-AUG-2024	Non-Expedited	Not Specified	Not Specified	Telix Pharmaceuticals	Healthcare Professional	Not Specified	-	11-JUL-2024	07-AUG-2024	US	Not Specified	US-TLX-2024000172	-	-
787	24	24182271	Illuccix	Gallium Ga-68 Gozetotide	Imaging Procedure;Product Used For Unknown Indication	Urticaria;Peripheral Swelling	Non-Serious	Non-Serious	Male	11-JUL-2024	07-AUG-2024	Non-Expedited	Not Specified	Not Specified	Telix Pharmaceuticals	Healthcare Professional	Not Specified	Lisinopril;Atorvastatin;Omeprazole	26-JUL-2024	07-AUG-2024	US	Not Specified	US-TLX-2024000173	-	-
788	25	24137930	Crestor;Locametz;Pluvicto	Lutetium Lu-177 Vipivotide Tetraxetan;Gallium Ga-68 Gozetotide;Rosuvastatin Calcium	Product Used For Unknown Indication	Weight Decreased;Rhabdomyolysis;Hypoxia;Idiopathic Pulmonary Fibrosis;Sciatica;Erectile Dysfunction;Pain In Extremity;Hypophosphataemia;Osteoporosis;Insomnia;Obstructive Sleep Apnoea Syndrome;Gastrooesophageal Reflux Disease;Chromaturia;Muscular Weakness;Neuropathy Peripheral;Plasma Cell Myeloma;Blood Creatine Phosphokinase Increased;Hot Flush;Glucose Tolerance Impaired;Headache;Hypertension;Seas…	Serious	Other Outcomes	Not Specified	-	25-JUL-2024	Expedited	Not Specified	Not Specified	Novartis	Consumer	Not Specified	-	16-JUL-2024	25-JUL-2024	US	Not Specified	NVSC2024US149334	-	-
789	26	24075441	Illuccix	Gallium Ga-68 Gozetotide	Imaging Procedure	Syncope;Blood Glucose Decreased;Seizure;Cardio-Respiratory Arrest	Serious	Other Outcomes;Hospitalized	Male	18-JAN-2024	10-JUL-2024	Expedited	67 YR	102.05 KG	Telix Pharmaceuticals	Healthcare Professional	Not Specified	-	28-JUN-2024	10-JUL-2024	US	Not Specified	US-ORG100022029-2024000143	-	-
790	27	24067412	Xarelto	Rivaroxaban;Gallium Ga-68 Gozetotide	Deep Vein Thrombosis;Hormone-Dependent Prostate Cancer	Anaemia	Serious	Hospitalized	Male	09-NOV-2023	09-JUL-2024	Expedited	86 YR	86.91 KG	Johnson And Johnson	Healthcare Professional	Not Specified	Leuprolide Acetate;Lipitor;Norvasc;Enoxaparin;Methocarbamol;Acetaminophen;Flomax;Calcium Carbonate;Hydrochlorothiazide;Apalutamide;Lupron;Docusate Sodium;Proscar	05-JUL-2024	09-JUL-2024	US	Not Specified	US-JNJFOC-20240716507	-	-
791	28	23985408	Zoladex;Eliquis;Toprol Xl	Metoprolol Succinate;Lutetium Lu-177 Vipivotide Tetraxetan;Apixaban;Goserelin Acetate;Abiraterone Acetate;Goserelin;Gallium Ga-68 Gozetotide	Hormone-Refractory Prostate Cancer;Product Used For Unknown Indication	Intra-Abdominal Haematoma;Pelvic Haematoma	Serious	Other Outcomes;Hospitalized	Not Specified	12-JAN-2023	18-JUN-2024	Expedited	Not Specified	Not Specified	Tersera Therapeutics	Healthcare Professional	Not Specified	Pravachol;Diethylstilbestrol;Darolutamide;Avalide;Paxil	07-JUN-2024	18-JUN-2024	US	Not Specified	US-TERSERA THERAPEUTICS LLC-2024TRS003066	-	-
792	29	23971408	Eliquis;Toprol Xl	Goserelin;Abiraterone Acetate;Metoprolol Succinate;Apixaban;Lutetium Lu-177 Vipivotide Tetraxetan;Gallium Ga-68 Gozetotide	Hormone-Refractory Prostate Cancer;Product Used For Unknown Indication	Pelvic Haematoma;Intra-Abdominal Haematoma	Serious	Hospitalized	Not Specified	12-JAN-2023	13-JUN-2024	Expedited	Not Specified	Not Specified	Unknown Manufacturer	Healthcare Professional	Not Specified	Pravachol;Darolutamide;Avalide;Paxil;Diethylstilbestrol	07-JUN-2024	13-JUN-2024	US	Not Specified	US-MELINTA THERAPEUTICS, LLC-US-MLNT-24-00293	-	-
793	30	23958045	Locametz	Gallium Ga-68 Gozetotide	Product Used For Unknown Indication	Feeling Abnormal	Non-Serious	Non-Serious	Not Specified	-	10-JUN-2024	Non-Expedited	Not Specified	Not Specified	Novartis	Healthcare Professional	Not Specified	-	06-JUN-2024	10-JUN-2024	US	Not Specified	NVSC2024US120353	-	-
794	31	23841982	Illuccix	Gallium Ga-68 Gozetotide	Imaging Procedure	Injection Site Pain	Non-Serious	Non-Serious	Male	03-FEB-2024	10-MAY-2024	Non-Expedited	60 YR	113 KG	Telix Pharmaceuticals	Healthcare Professional	Not Specified	-	04-APR-2024	10-MAY-2024	US	Not Specified	US-TLX-2024000151	-	-
795	32	23841054	Illuccix	Gallium Ga-68 Gozetotide	Product Used For Unknown Indication	Injection Site Pain	Non-Serious	Non-Serious	Male	-	10-MAY-2024	Non-Expedited	Not Specified	Not Specified	Telix Pharmaceuticals	Healthcare Professional	Not Specified	-	24-APR-2024	10-MAY-2024	US	Not Specified	US-TLX-2024000167	-	-
796	33	23841042	Illuccix	Gallium Ga-68 Gozetotide	Product Used For Unknown Indication	Injection Site Swelling;Injection Site Erythema;Injection Site Pruritus	Non-Serious	Non-Serious	Male	-	10-MAY-2024	Non-Expedited	Not Specified	Not Specified	Telix Pharmaceuticals	Consumer	Not Specified	-	17-APR-2024	10-MAY-2024	US	Not Specified	US-TLX-2024000165	-	-
797	34	23841040	Illuccix	Gallium Ga-68 Gozetotide	Product Used For Unknown Indication	Injection Site Pain	Non-Serious	Non-Serious	Male	-	10-MAY-2024	Non-Expedited	Not Specified	Not Specified	Telix Pharmaceuticals	Healthcare Professional	Not Specified	-	08-APR-2024	10-MAY-2024	US	Not Specified	US-TLX-2024000164	-	-
798	35	23841037	Illuccix	Gallium Ga-68 Gozetotide	Imaging Procedure	Injection Site Pain	Non-Serious	Non-Serious	Male	22-FEB-2024	10-MAY-2024	Non-Expedited	Not Specified	Not Specified	Telix Pharmaceuticals	Healthcare Professional	Not Specified	-	22-FEB-2024	10-MAY-2024	US	Not Specified	US-TLX-2024000161	-	-
799	36	23841034	Illuccix	Gallium Ga-68 Gozetotide	Imaging Procedure	Injection Site Pain	Non-Serious	Non-Serious	Male	02-MAR-2024	10-MAY-2024	Non-Expedited	76 YR	94 KG	Telix Pharmaceuticals	Healthcare Professional	Not Specified	-	04-APR-2024	10-MAY-2024	US	Not Specified	US-TLX-2024000163	-	-
800	37	23841032	Illuccix	Gallium Ga-68 Gozetotide	Imaging Procedure	Injection Site Pain	Non-Serious	Non-Serious	Male	22-FEB-2024	10-MAY-2024	Non-Expedited	Not Specified	Not Specified	Telix Pharmaceuticals	Healthcare Professional	Not Specified	-	22-FEB-2024	10-MAY-2024	US	Not Specified	US-TLX-2024000162	-	-
801	38	23841029	Illuccix	Gallium Ga-68 Gozetotide	Imaging Procedure	Injection Site Pain	Non-Serious	Non-Serious	Male	16-FEB-2024	10-MAY-2024	Non-Expedited	85 YR	47 KG	Telix Pharmaceuticals	Healthcare Professional	Not Specified	-	04-APR-2024	10-MAY-2024	US	Not Specified	US-TLX-2024000158	-	-
802	39	23841025	Illuccix	Gallium Ga-68 Gozetotide	Product Used For Unknown Indication	Injection Site Pain	Non-Serious	Non-Serious	Male	11-AUG-2023	10-MAY-2024	Non-Expedited	66 YR	53.97 KG	Telix Pharmaceuticals	Healthcare Professional	Not Specified	-	15-FEB-2024	10-MAY-2024	US	Not Specified	US-TLX-2024000157	-	-
803	40	23841021	Illuccix	Gallium Ga-68 Gozetotide	Product Used For Unknown Indication	Injection Site Pain	Non-Serious	Non-Serious	Male	04-AUG-2023	10-MAY-2024	Non-Expedited	88 YR	93.89 KG	Telix Pharmaceuticals	Healthcare Professional	Not Specified	-	15-FEB-2024	10-MAY-2024	US	Not Specified	US-TLX-2024000156	-	-
804	41	23841018	Illuccix	Gallium Ga-68 Gozetotide	Imaging Procedure	Injection Site Pain;Pain In Extremity	Non-Serious	Non-Serious	Male	17-JAN-2024	10-MAY-2024	Non-Expedited	80 YR	72.57 KG	Telix Pharmaceuticals	Healthcare Professional	Not Specified	-	15-FEB-2024	10-MAY-2024	US	Not Specified	US-TLX-2024000155	-	-
805	42	23841017	Illuccix	Gallium Ga-68 Gozetotide	Product Used For Unknown Indication	Injection Site Discomfort	Non-Serious	Non-Serious	Male	15-SEP-2023	10-MAY-2024	Non-Expedited	75 YR	90.26 KG	Telix Pharmaceuticals	Healthcare Professional	Not Specified	-	15-FEB-2024	10-MAY-2024	US	Not Specified	US-TLX-2024000154	-	-
806	43	23841014	Illuccix	Gallium Ga-68 Gozetotide	Imaging Procedure	Injection Site Pain	Non-Serious	Non-Serious	Male	09-FEB-2024	10-MAY-2024	Non-Expedited	Not Specified	Not Specified	Telix Pharmaceuticals	Healthcare Professional	Not Specified	-	09-FEB-2024	10-MAY-2024	US	Not Specified	US-TLX-2024000152	-	-
807	44	23841010	Illuccix	Gallium Ga-68 Gozetotide	Imaging Procedure	Injection Site Pain	Non-Serious	Non-Serious	Male	02-FEB-2024	10-MAY-2024	Non-Expedited	52 YR	68.94 KG	Telix Pharmaceuticals	Healthcare Professional	Not Specified	-	29-MAR-2024	10-MAY-2024	US	Not Specified	US-TLX-2024000150	-	-
808	45	23841007	Illuccix	Gallium Ga-68 Gozetotide	Product Used For Unknown Indication	Injection Site Pain	Non-Serious	Non-Serious	Male	-	10-MAY-2024	Non-Expedited	72 YR	136 KG	Telix Pharmaceuticals	Healthcare Professional	Not Specified	-	01-FEB-2024	10-MAY-2024	US	Not Specified	US-TLX-2024000149	-	-
809	46	23486531	Locametz	Gallium Ga-68 Gozetotide	Product Used For Unknown Indication	Vascular Access Complication	Non-Serious	Non-Serious	Not Specified	-	29-FEB-2024	Non-Expedited	Not Specified	Not Specified	Novartis	Consumer	Not Specified	-	27-FEB-2024	06-FEB-2024	US	Not Specified	NVSC2024US010581	-	-
810	47	23573593	Illuccix	Gallium Ga-68 Gozetotide	Imaging Procedure	Injection Site Pain	Non-Serious	Non-Serious	Male	26-JAN-2024	28-FEB-2024	Non-Expedited	Not Specified	Not Specified	Telix Pharmaceuticals	Healthcare Professional	Not Specified	-	26-JAN-2024	28-FEB-2024	US	Not Specified	US-TLX-2024000148	-	-
811	48	23573592	Illuccix	Gallium Ga-68 Gozetotide	Imaging Procedure	Injection Site Pain	Non-Serious	Non-Serious	Male	-	28-FEB-2024	Non-Expedited	Not Specified	Not Specified	Telix Pharmaceuticals	Healthcare Professional	Not Specified	-	08-FEB-2024	28-FEB-2024	US	Not Specified	US-TLX-2024000140	-	-
812	49	23573591	Illuccix	Gallium Ga-68 Gozetotide	Imaging Procedure;Product Used For Unknown Indication	Headache;Diarrhoea;Nausea	Non-Serious	Non-Serious	Male	15-JAN-2024	28-FEB-2024	Non-Expedited	66 YR	90.71 KG	Telix Pharmaceuticals	Healthcare Professional	Not Specified	Testosterone Cypionate;Tamsulosin;Amlodipine;Pantoprazole;Clopidogrel;Metoprolol Tartrate;Repatha;Aspirin;Metformin;Loratadine	03-FEB-2024	28-FEB-2024	US	Not Specified	US-TLX-2024000137	-	-
813	50	23573582	Illuccix	Gallium Ga-68 Gozetotide	Imaging Procedure	Axillary Pain	Non-Serious	Non-Serious	Male	02-JAN-2024	28-FEB-2024	Non-Expedited	44 YR	94.8 KG	Telix Pharmaceuticals	Healthcare Professional	Not Specified	-	22-JAN-2024	28-FEB-2024	US	Not Specified	US-TLX-2024000135	-	-
814	51	23573580	Illuccix	Gallium Ga-68 Gozetotide	Imaging Procedure	Injection Site Pain	Non-Serious	Non-Serious	Male	18-JAN-2024	28-FEB-2024	Non-Expedited	63 YR	104.32 KG	Telix Pharmaceuticals	Healthcare Professional	Not Specified	-	05-FEB-2024	28-FEB-2024	US	Not Specified	US-TLX-2024000138	-	-
815	52	23573579	Illuccix	Gallium Ga-68 Gozetotide	Imaging Procedure	Injection Site Pain	Non-Serious	Non-Serious	Male	26-JAN-2024	28-FEB-2024	Non-Expedited	Not Specified	Not Specified	Telix Pharmaceuticals	Healthcare Professional	Not Specified	-	26-JAN-2024	28-FEB-2024	US	Not Specified	US-TLX-2024000147	-	-
816	53	23573573	Illuccix	Gallium Ga-68 Gozetotide	Imaging Procedure	Injection Site Pain	Non-Serious	Non-Serious	Male	26-JAN-2024	28-FEB-2024	Non-Expedited	Not Specified	Not Specified	Telix Pharmaceuticals	Healthcare Professional	Not Specified	-	26-JAN-2024	28-FEB-2024	US	Not Specified	US-TLX-2024000146	-	-
817	54	23573569	Illuccix	Gallium Ga-68 Gozetotide	Product Used For Unknown Indication	Injection Site Pain	Non-Serious	Non-Serious	Male	25-JAN-2024	28-FEB-2024	Non-Expedited	85 YR	72.57 KG	Telix Pharmaceuticals	Healthcare Professional	Not Specified	-	26-JAN-2024	28-FEB-2024	US	Not Specified	US-TLX-2024000145	-	-
818	55	23573567	Illuccix	Gallium Ga-68 Gozetotide	Imaging Procedure	Injection Site Pain	Non-Serious	Non-Serious	Male	23-DEC-2023	28-FEB-2024	Non-Expedited	Not Specified	Not Specified	Telix Pharmaceuticals	Consumer	Not Specified	-	26-DEC-2023	28-FEB-2024	US	Not Specified	US-TLX-2023000134	-	-
819	56	23573564	Illuccix	Gallium Ga-68 Gozetotide	Imaging Procedure	Injection Site Pain	Non-Serious	Non-Serious	Male	23-DEC-2023	28-FEB-2024	Non-Expedited	Not Specified	Not Specified	Telix Pharmaceuticals	Consumer	Not Specified	-	26-DEC-2023	28-FEB-2024	US	Not Specified	US-TLX-2023000133	-	-
820	57	23573557	Illuccix	Gallium Ga-68 Gozetotide	Imaging Procedure	Dysphagia	Non-Serious	Non-Serious	Male	30-OCT-2023	28-FEB-2024	Non-Expedited	77 YR	88.9 KG	Telix Pharmaceuticals	Healthcare Professional	Not Specified	-	19-DEC-2023	28-FEB-2024	US	Not Specified	US-TLX-2023000129	-	-
821	58	23324693	Illuccix	Gallium Ga-68 Gozetotide	Product Used For Unknown Indication	Injection Site Pain	Non-Serious	Non-Serious	Male	-	28-FEB-2024	Non-Expedited	Not Specified	Not Specified	Telix Pharmaceuticals	Healthcare Professional	Not Specified	-	12-DEC-2023	21-DEC-2023	US	Not Specified	US-TLX-2023000132	-	-
822	59	23559332	Illuccix	Gallium Ga-68 Gozetotide	Imaging Procedure	Syncope	Serious	Other Outcomes	Male	18-JAN-2024	23-FEB-2024	Expedited	67 YR	102.05 KG	Telix Pharmaceuticals	Healthcare Professional	Not Specified	-	15-FEB-2024	23-FEB-2024	US	Not Specified	US-TLX-2024000143	-	-
823	60	23462562	Illuccix	Gallium Ga-68 Gozetotide	Product Used For Unknown Indication	Loss Of Consciousness;Injection Site Pain	Serious	Other Outcomes	Male	06-JAN-2023	23-FEB-2024	Expedited	71 YR	96.16 KG	Telix Pharmaceuticals	Healthcare Professional	Not Specified	-	15-FEB-2024	31-JAN-2024	US	Not Specified	US-TLX-2024000141	-	-
824	61	23460359	Illuccix	Gallium Ga-68 Gozetotide	Imaging Procedure	Loss Of Consciousness	Serious	Other Outcomes	Male	-	31-JAN-2024	Expedited	Not Specified	Not Specified	Telix Pharmaceuticals	Healthcare Professional	Not Specified	-	19-JAN-2024	31-JAN-2024	US	Not Specified	US-TLX-2024000142	-	-
825	62	23459723	Illuccix	Gallium Ga-68 Gozetotide;Acapatamab;Fludeoxyglucose F-18;Pembrolizumab	Premedication;Product Used For Unknown Indication;Prophylaxis Against Dehydration;Prostate Cancer Metastatic	Uveitis;Cytokine Release Syndrome	Serious	Other Outcomes;Hospitalized	Male	05-OCT-2021	31-JAN-2024	Expedited	71 YR	Not Specified	Telix Pharmaceuticals	Consumer	Not Specified	Magnesium Aspartate;Pantoprazole;Metoclopramide;Simethicone (Dimethicone);Dexamethasone;Loratadine;Temazepam;Probiotics Nos;Calcium Chloride\Potassium Chloride\Sodium Chloride\Sodium Lactate;Potassium Chloride;Sodium Chloride;Vitamin D;Ibuprofen;Ondansetron;Loperamide;Acetaminophen	19-JAN-2024	31-JAN-2024	AU	Not Specified	AU-TLX-2023000119	-	-
826	63	23438392	-	Gallium Ga-68 Gozetotide;Enzalutamide	Arrhythmia;Atrial Fibrillation;Haematuria;Hormone-Refractory Prostate Cancer;Hypercholesterolaemia;Hypertension;Hyperuricaemia;Product Used For Unknown Indication;Prophylaxis	Hypercalcaemia	Serious	Hospitalized	Male	26-MAY-2023	24-JAN-2024	Expedited	84 YR	82 KG	Sandoz	Healthcare Professional	Not Specified	Lercanidipine Hydrochloride;Calcium\Cholecalciferol;Venofer;Levocetirizine;Eligard;Ciprofibrate;Amiodarone;Allopurinol;Innohep;Eliquis;Tranexamic Acid	24-JAN-2024	24-JAN-2024	FR	Not Specified	FR-SANDOZ INC.-SDZ2023FR002247	-	-
827	64	23422924	Illuccix	Gallium Ga-68 Gozetotide	Diagnostic Procedure;Prostate Cancer	Blood Glucose Decreased;Cardio-Respiratory Arrest;Seizure	Serious	Hospitalized	Male	18-JAN-2024	19-JAN-2024	Direct	Not Specified	Not Specified	Fda-Ctu	Consumer	Not Specified	-	-	19-JAN-2024	Not Specified	Y	-	-	Yes
828	65	23403550	Locametz	Gallium Ga-68 Gozetotide	Product Used For Unknown Indication	Positron Emission Tomogram Abnormal	Non-Serious	Non-Serious	Not Specified	-	16-JAN-2024	Non-Expedited	Not Specified	Not Specified	Novartis	Healthcare Professional	Not Specified	-	04-JAN-2024	16-JAN-2024	US	Not Specified	NVSC2024US008037	-	-
829	66	23376292	Illuccix	Gallium Ga-68 Gozetotide	Product Used For Unknown Indication	Injection Site Pain	Non-Serious	Non-Serious	Male	-	08-JAN-2024	Non-Expedited	Not Specified	Not Specified	Telix Pharmaceuticals	Healthcare Professional	Not Specified	-	13-OCT-2023	08-JAN-2024	US	Not Specified	US-TLX-2023000126	-	-
830	67	23376288	Illuccix	Gallium Ga-68 Gozetotide	Product Used For Unknown Indication	Vomiting	Non-Serious	Non-Serious	Male	08-SEP-2023	08-JAN-2024	Non-Expedited	83 YR	104.32 KG	Telix Pharmaceuticals	Healthcare Professional	Not Specified	-	26-OCT-2023	08-JAN-2024	US	Not Specified	US-TLX-2023000127	-	-
831	68	20752093	Locametz;Pluvicto	Lutetium Lu-177 Vipivotide Tetraxetan;Gallium Ga-68 Gozetotide;Enzalutamide	Adrenal Insufficiency;Arteriosclerosis Coronary Artery;General Physical Condition;Hormone-Refractory Prostate Cancer;Hypercholesterolaemia;Pneumonia;Premedication	Intestinal Obstruction	Serious	Life Threatening;Hospitalized	Male	02-APR-2022	08-DEC-2023	Expedited	63 YR	92 KG	Novartis	Healthcare Professional	Not Specified	Simvastatin;Augmentin;Hydrocortisone;Aspirin;Ondansetron	06-DEC-2023	26-APR-2022	BE	Not Specified	NVSC2022BE077259	-	-
832	69	23226649	Locametz;Pluvicto	Lutetium Lu-177 Vipivotide Tetraxetan;Gallium Ga-68 Gozetotide	Cancer Pain;Hormone-Refractory Prostate Cancer;Hyperlipidaemia;Prostate Cancer;Tumour Pain;Type 2 Diabetes Mellitus	Anaemia	Serious	Hospitalized	Male	22-NOV-2023	01-DEC-2023	Expedited	60 YR	62 KG	Novartis	Healthcare Professional	Not Specified	Enzalutamide;Insulin Aspart;Tramadol Hydrochloride;Leuprolide Acetate;Oxycodone And Acetaminophen;Pitavastatin Calcium;Aspirin;Morphine	23-NOV-2023	24-NOV-2023	CN	Not Specified	NVSC2023CN249512	-	-
833	70	22595670	Locametz;Pluvicto	Lutetium Lu-177 Vipivotide Tetraxetan;Acetaminophen;Gallium Ga-68 Gozetotide;Diclofenac	Constipation;Hormone-Refractory Prostate Cancer;Prophylaxis Against Gastrointestinal Ulcer	Bone Marrow Failure	Serious	Died;Other Outcomes	Male	25-JUL-2019	13-NOV-2023	Expedited	Not Specified	67 KG	Novartis	Healthcare Professional	Not Specified	Movicolon;Omeprazole	07-NOV-2023	13-JUN-2023	NL	Not Specified	NVSC2019NL095096	-	-
834	71	23063836	Illuccix	Gallium Ga-68 Gozetotide	Imaging Procedure	Injection Site Pain	Non-Serious	Non-Serious	Male	04-AUG-2023	13-OCT-2023	Non-Expedited	Not Specified	Not Specified	Telix Pharmaceuticals	Healthcare Professional	Not Specified	-	17-AUG-2023	13-OCT-2023	US	Not Specified	US-Telix Pharmaceuticals-2147046	-	-
835	72	23063679	Illuccix	Gallium Ga-68 Gozetotide	Imaging Procedure	Injection Site Pain	Non-Serious	Non-Serious	Male	03-JUL-2023	13-OCT-2023	Non-Expedited	75 YR	88 KG	Telix Pharmaceuticals	Healthcare Professional	Not Specified	Isovue 300	06-JUL-2023	13-OCT-2023	US	Not Specified	US-Telix Pharmaceuticals-2147050	-	-
836	73	23063667	Illuccix	Gallium Ga-68 Gozetotide	Imaging Procedure	Chest Pain	Non-Serious	Non-Serious	Male	30-AUG-2023	13-OCT-2023	Non-Expedited	66 YR	122 KG	Telix Pharmaceuticals	Healthcare Professional	Not Specified	-	30-AUG-2023	13-OCT-2023	US	Not Specified	US-Telix Pharmaceuticals-2147055	-	-
837	74	23063500	Illuccix	Gallium Ga-68 Gozetotide	Imaging Procedure	Injection Site Pain	Non-Serious	Non-Serious	Male	24-AUG-2023	13-OCT-2023	Non-Expedited	Not Specified	Not Specified	Telix Pharmaceuticals	Healthcare Professional	Not Specified	-	25-AUG-2023	13-OCT-2023	US	Not Specified	US-Telix Pharmaceuticals-2147048	-	-
838	75	23063498	Illuccix	Gallium Ga-68 Gozetotide	Product Used For Unknown Indication	Injection Site Pain	Non-Serious	Non-Serious	Male	27-JUN-2023	13-OCT-2023	Non-Expedited	72 YR	Not Specified	Telix Pharmaceuticals	Healthcare Professional	Not Specified	-	27-JUN-2023	13-OCT-2023	US	Not Specified	US-Telix Pharmaceuticals-2147052	-	-
839	76	23060021	Illuccix	Gallium Ga-68 Gozetotide	Imaging Procedure	Injection Site Pain	Non-Serious	Non-Serious	Male	22-AUG-2023	12-OCT-2023	Non-Expedited	Not Specified	Not Specified	Telix Pharmaceuticals	Healthcare Professional	Not Specified	-	22-AUG-2023	12-OCT-2023	US	Not Specified	US-Telix Pharmaceuticals-2147045	-	-
840	77	23059929	Illuccix	Gallium Ga-68 Gozetotide	Imaging Procedure	Injection Site Pain	Non-Serious	Non-Serious	Male	17-AUG-2023	12-OCT-2023	Non-Expedited	Not Specified	Not Specified	Telix Pharmaceuticals	Healthcare Professional	Not Specified	-	17-AUG-2023	12-OCT-2023	US	Not Specified	US-Telix Pharmaceuticals-2147044	-	-
841	78	23059854	Illuccix	Gallium Ga-68 Gozetotide	Product Used For Unknown Indication	Injection Site Pain	Non-Serious	Non-Serious	Male	25-JUL-2023	12-OCT-2023	Non-Expedited	Not Specified	Not Specified	Telix Pharmaceuticals	Healthcare Professional	Not Specified	-	26-JUL-2023	12-OCT-2023	US	Not Specified	US-Telix Pharmaceuticals-2147043	-	-
842	79	23059774	Illuccix	Gallium Ga-68 Gozetotide	Product Used For Unknown Indication	Injection Site Pain	Non-Serious	Non-Serious	Male	24-JUL-2023	12-OCT-2023	Non-Expedited	Not Specified	Not Specified	Telix Pharmaceuticals	Healthcare Professional	Not Specified	-	26-JUL-2023	12-OCT-2023	US	Not Specified	US-Telix Pharmaceuticals-2147040	-	-
843	80	23058499	Illuccix	Gallium Ga-68 Gozetotide	Product Used For Unknown Indication	Injection Site Pain	Non-Serious	Non-Serious	Male	19-JUL-2023	12-OCT-2023	Non-Expedited	79 YR	Not Specified	Telix Pharmaceuticals	Healthcare Professional	Not Specified	-	26-JUL-2023	12-OCT-2023	US	Not Specified	US-Telix Pharmaceuticals-2147021	-	-
844	81	23058367	Illuccix	Gallium Ga-68 Gozetotide	Product Used For Unknown Indication	Injection Site Pain	Non-Serious	Non-Serious	Male	26-JUL-2023	12-OCT-2023	Non-Expedited	68 YR	Not Specified	Telix Pharmaceuticals	Healthcare Professional	Not Specified	-	26-JUL-2023	12-OCT-2023	US	Not Specified	US-Telix Pharmaceuticals-2147015	-	-
845	82	23058356	Illuccix	Gallium Ga-68 Gozetotide	Imaging Procedure	Injection Site Pain	Non-Serious	Non-Serious	Male	11-JUL-2023	12-OCT-2023	Non-Expedited	Not Specified	Not Specified	Telix Pharmaceuticals	Healthcare Professional	Not Specified	-	11-JUL-2023	12-OCT-2023	US	Not Specified	US-Telix Pharmaceuticals-2147014	-	-
846	83	22699233	Illuccix	Gallium Ga-68 Gozetotide	Imaging Procedure	Drug Ineffective	Non-Serious	Non-Serious	Male	21-FEB-2023	12-OCT-2023	Non-Expedited	52 YR	Not Specified	Telix Pharmaceuticals	Healthcare Professional	Not Specified	-	06-JUL-2023	13-JUL-2023	US	Not Specified	US-PharmaLex India-2143653	-	-
847	84	23026928	Locametz	Gallium Ga-68 Gozetotide	Hormone-Dependent Prostate Cancer	Gastrointestinal Haemorrhage	Serious	Hospitalized	Male	-	06-OCT-2023	Expedited	68 YR	Not Specified	Novartis	Healthcare Professional	Not Specified	-	02-OCT-2023	04-OCT-2023	US	Not Specified	NVSC2023US212470	-	-
848	85	21322141	Locametz;Pluvicto	Lutetium Lu-177 Vipivotide Tetraxetan;Gallium Ga-68 Gozetotide	Arthralgia;Hormone-Refractory Prostate Cancer;Nutritional Supplementation;Pelvic Venous Thrombosis;Premedication;Prophylaxis;Prostate Cancer;Vitamin Supplementation	Aspartate Aminotransferase Increased;Alanine Aminotransferase Increased	Serious	Other Outcomes	Male	09-SEP-2021	06-OCT-2023	Expedited	57 YR	76 KG	Novartis	Healthcare Professional	Not Specified	Cannabidiol;Denosumab;Acetaminophen;Polysaccharide-K;Calcium Carbonate\Cholecalciferol;Eliquis;Ondansetron	04-OCT-2023	12-SEP-2022	FR	Not Specified	NVSC2021FR243009	-	-
849	86	22990531	Locametz	Gallium Ga-68 Gozetotide	Product Used For Unknown Indication	Hypoglycaemia	Non-Serious	Non-Serious	Not Specified	-	27-SEP-2023	Non-Expedited	Not Specified	Not Specified	Novartis	Healthcare Professional	Not Specified	-	19-SEP-2023	27-SEP-2023	US	Not Specified	NVSC2023US205152	-	-
850	87	22915730	Eliquis	Apixaban;Gallium Ga-68 Gozetotide	Product Used For Unknown Indication;Prostate Cancer	Pulmonary Embolism	Serious	Other Outcomes;Life Threatening;Hospitalized	Male	30-MAY-2023	07-SEP-2023	Expedited	62 YR	Not Specified	Bristol Myers Squibb	Healthcare Professional	Not Specified	-	04-SEP-2023	07-SEP-2023	US	Not Specified	US-BRISTOL-MYERS SQUIBB COMPANY-2023-125472	-	-
851	88	22804509	Pluvicto;Locametz	Gallium Ga-68 Gozetotide;Abiraterone;Lutetium Lu-177 Vipivotide Tetraxetan	Hormone-Dependent Prostate Cancer;Product Used For Unknown Indication	Transaminases Increased	Serious	Other Outcomes	Male	07-JUN-2023	04-SEP-2023	Expedited	73 YR	85.5 KG	Novartis	Healthcare Professional	Not Specified	Triptorelin;Apalutamide	31-AUG-2023	09-AUG-2023	ES	Not Specified	NVSC2023ES131303	-	-
852	89	22818752	Pluvicto;Locametz	Gallium Ga-68 Gozetotide;Lutetium Lu-177 Vipivotide Tetraxetan	Benign Prostatic Hyperplasia;Hormone-Dependent Prostate Cancer;Nausea;Product Used For Unknown Indication;Rhinitis Allergic;Vomiting	Syncope	Serious	Hospitalized	Male	09-AUG-2023	18-AUG-2023	Expedited	72 YR	68.7 KG	Novartis	Healthcare Professional	Not Specified	Abiraterone;Olopatadine;Fluticasone;Prochlorperazine Maleate;Albuterol;Tamsulosin;Leuprolide;Montelukast	14-AUG-2023	14-AUG-2023	US	Not Specified	NVSC2023US175656	-	-
853	90	22828613	Illuccix	Gallium Ga-68 Gozetotide;Fludeoxyglucose F-18;Pembrolizumab	Product Used For Unknown Indication	Uveitis	Serious	Other Outcomes	Male	-	16-AUG-2023	Expedited	71 YR	Not Specified	Pharmalex	Consumer	Not Specified	Metoclopramide;Ibuprofen;Simethicone (Dimethicone);Sodium Chloride;Potassium Chloride;Magnesium Aspartate;Dexamethasone;Ondansetron;Acetaminophen;Pantoprazole;Loratadine;Temazepam	01-AUG-2023	16-AUG-2023	AU	Not Specified	AU-PharmaLex India-2144865	-	-
854	91	22699752	Illuccix	Gallium Ga-68 Gozetotide	Product Used For Unknown Indication	Injection Site Paraesthesia	Non-Serious	Non-Serious	Male	-	13-JUL-2023	Non-Expedited	Not Specified	Not Specified	Pharmalex	Healthcare Professional	Not Specified	-	02-MAY-2023	13-JUL-2023	US	Not Specified	US-PharmaLex India-2143662	-	-
855	92	22699721	Illuccix	Gallium Ga-68 Gozetotide	Imaging Procedure	Injection Site Pain	Non-Serious	Non-Serious	Male	13-JUN-2023	13-JUL-2023	Non-Expedited	Not Specified	Not Specified	Pharmalex	Healthcare Professional	Not Specified	-	13-JUN-2023	13-JUL-2023	US	Not Specified	US-PharmaLex India-2143661	-	-
856	93	22699661	Illuccix	Gallium Ga-68 Gozetotide	Imaging Procedure	Drug Ineffective	Non-Serious	Non-Serious	Male	15-MAY-2023	13-JUL-2023	Non-Expedited	56 YR	Not Specified	Pharmalex	Healthcare Professional	Not Specified	-	01-JUN-2023	13-JUL-2023	US	Not Specified	US-PharmaLex India-2143659	-	-
857	94	22699629	Illuccix	Gallium Ga-68 Gozetotide	Product Used For Unknown Indication	Injection Site Pain	Non-Serious	Non-Serious	Male	01-JUN-2023	13-JUL-2023	Non-Expedited	Not Specified	Not Specified	Pharmalex	Healthcare Professional	Not Specified	-	01-JUN-2023	13-JUL-2023	US	Not Specified	US-PharmaLex India-2143658	-	-
858	95	22699452	Illuccix	Gallium Ga-68 Gozetotide	Imaging Procedure	Drug Ineffective	Non-Serious	Non-Serious	Male	-	13-JUL-2023	Non-Expedited	Not Specified	Not Specified	Pharmalex	Healthcare Professional	Not Specified	-	23-MAY-2023	13-JUL-2023	US	Not Specified	US-PharmaLex India-2143657	-	-
859	96	22699369	Illuccix	Gallium Ga-68 Gozetotide	Imaging Procedure	Injection Site Pain	Non-Serious	Non-Serious	Male	-	13-JUL-2023	Non-Expedited	Not Specified	Not Specified	Pharmalex	Healthcare Professional	Not Specified	-	23-MAY-2023	13-JUL-2023	US	Not Specified	US-PharmaLex India-2143655	-	-
860	97	22699169	Illuccix	Gallium Ga-68 Gozetotide	-	Drug Ineffective	Non-Serious	Non-Serious	Male	-	13-JUL-2023	Non-Expedited	Not Specified	Not Specified	Pharmalex	Healthcare Professional	Not Specified	-	23-MAY-2023	13-JUL-2023	US	Not Specified	US-PharmaLex India-2143652	-	-
861	98	22699070	Illuccix	Gallium Ga-68 Gozetotide	Product Used For Unknown Indication	Injection Site Pain	Non-Serious	Non-Serious	Male	21-MAR-2023	13-JUL-2023	Non-Expedited	Not Specified	Not Specified	Pharmalex	Healthcare Professional	Not Specified	-	22-MAR-2023	13-JUL-2023	US	Not Specified	US-PharmaLex India-2143650	-	-
862	99	22259530	Locametz;Pluvicto	Lutetium Lu-177 Vipivotide Tetraxetan;Gallium Ga-68 Gozetotide	Back Pain;Diarrhoea;Essential Hypertension;Gastrooesophageal Reflux Prophylaxis;Hormone-Refractory Prostate Cancer;Nausea;Oedema Peripheral;Osteoarthritis;Pelvic Pain;Pollakiuria;Pulmonary Embolism;Rotator Cuff Syndrome;Transient Ischaemic Attack;Vomiting	Dry Mouth	Non-Serious	Non-Serious	Male	29-MAR-2023	13-JUL-2023	Expedited	78 YR	82.2 KG	Novartis	Healthcare Professional	Not Specified	Loperamide;Omeprazole;Trospium;Amlodipine;Tramadol;Quinine Sulfate;Aspirin;Lisinopril;Rivaroxaban;Ondansetron;Furosemide	08-JUL-2023	27-APR-2023	GB	Not Specified	NVSC2023GB091351	-	-
863	100	22241326	Locametz	Gallium Ga-68 Gozetotide	Product Used For Unknown Indication	Expired Product Administered	Non-Serious	Non-Serious	Not Specified	12-APR-2023	26-JUN-2023	Non-Expedited	Not Specified	Not Specified	Novartis	Healthcare Professional	Not Specified	-	16-JUN-2023	21-APR-2023	US	Not Specified	NVSC2023US089941	-	-
864	101	22602737	Locametz;Xgeva;Pluvicto	Lutetium Lu-177 Vipivotide Tetraxetan;Leuprolide;Dexamethasone;Denosumab;Gallium Ga-68 Gozetotide;Enzalutamide	Anaemia;Blood Uric Acid;Hormone-Refractory Prostate Cancer;Pain;Positron Emission Tomogram;Prostatomegaly;Smoking Cessation Therapy	Haemorrhage Intracranial;Pancytopenia	Serious	Hospitalized;Died	Male	02-JUL-2019	15-JUN-2023	Expedited	Not Specified	67 KG	Novartis	Healthcare Professional	Not Specified	Cyanocobalamin;Nicotine Polacrilex;Tamsulosin;Morphine;Allopurinol;Acetaminophen\Hydrocodone	08-JUN-2023	15-JUN-2023	US	Not Specified	NVSC2019US094922	-	-
865	102	21891292	Locametz;Lupron;Pluvicto	Lutetium Lu-177 Vipivotide Tetraxetan;Leuprolide Acetate;Gallium Ga-68 Gozetotide	Atrial Fibrillation;Cardiovascular Disorder;Catheterisation Cardiac;Constipation;Hormone-Dependent Prostate Cancer;Hypokalaemia;Nausea;Product Used For Unknown Indication;Supplementation Therapy	Ventricular Tachycardia	Serious	Hospitalized	Male	18-JAN-2023	23-MAY-2023	Expedited	77 YR	83.4 KG	Novartis	Healthcare Professional	Not Specified	Vitamin A;Prochlorperazine;Miralax;Vitamin D3;Xtandi;Ascorbic Acid;Fentanyl;Potassium Chloride;Pyridoxine;Cyanocobalamin;Heparin;Aspirin;Degarelix;Ondansetron	17-MAY-2023	20-JAN-2023	US	Not Specified	NVSC2023US012701	-	-
866	103	22341026	Locametz	Gallium Ga-68 Gozetotide	Product Used For Unknown Indication	Nausea;Fatigue	Non-Serious	Non-Serious	Not Specified	-	18-MAY-2023	Non-Expedited	Not Specified	Not Specified	Novartis	Healthcare Professional	Not Specified	-	15-MAY-2023	18-MAY-2023	US	Not Specified	NVSC2023US112734	-	-
867	104	22241797	Locametz	Gallium Ga-68 Gozetotide	Product Used For Unknown Indication	Expired Product Administered	Non-Serious	Non-Serious	Not Specified	-	24-APR-2023	Non-Expedited	Not Specified	Not Specified	Novartis	Consumer	Not Specified	-	18-APR-2023	21-APR-2023	US	Not Specified	NVSC2023US091526	-	-
868	105	22154221	Locametz;Pluvicto	Lutetium Lu-177 Vipivotide Tetraxetan;Gallium Ga-68 Gozetotide	Arthralgia;General Physical Condition;Hormone-Refractory Prostate Cancer;Hypertension;Myalgia;Premedication;Prostate Cancer;Seasonal Allergy	Febrile Neutropenia;Sepsis;Skin Infection;Pancytopenia;Anaemia;White Blood Cell Count Decreased	Serious	Hospitalized	Male	12-AUG-2022	24-APR-2023	Expedited	65 YR	95.5 KG	Novartis	Healthcare Professional	Not Specified	Docetaxel;Herbals\Saw Palmetto;Lisinopril;Cetirizine Hydrochloride;Glucosamine;Metoprolol;Ibuprofen;Leuprolide Acetate;Hydrochlorothiazide;Zoledronic Acid;Vitamin D3;Dexamethasone;Herbals\Turmeric	20-APR-2023	30-MAR-2023	US	Not Specified	NVSC2022US184923	-	-
869	106	22217867	Pluvicto;Locametz	Gallium Ga-68 Gozetotide;Lutetium Lu-177 Vipivotide Tetraxetan	Anxiety;Back Pain;Dyslipidaemia;Gout;Hormone-Dependent Prostate Cancer;Hypertension;Mineral Supplementation;Oedema Peripheral;Paraesthesia;Product Used For Unknown Indication;Prophylaxis;Prostate Cancer;Sleep Disorder;Supplementation Therapy;Type 2 Diabetes Mellitus	Gastroenteritis	Serious	Hospitalized	Male	07-APR-2023	19-APR-2023	Expedited	74 YR	121.8 KG	Novartis	Healthcare Professional	Not Specified	Vitamin D3;Allopurinol;Bromazepam;Bisoprolol;Enzalutamide;Trazodone;Vitamin B12;Gliclazide;Clopidogrel;Darolutamide;Jardiance;Effexor;Pregabalin;Calcium Carbonate;Amlodipine;Lasix;Tylenol Arthritis Pain;Magnesium;Quetiapine;Candesartan;Metformin Hydrochloride;Goserelin;Rosuvastatin	12-APR-2023	17-APR-2023	CA	Not Specified	NVSC2023CA083872	-	-
870	107	22205981	Illuccix	Gallium Ga-68 Gozetotide	Imaging Procedure	Injection Site Pain	Non-Serious	Non-Serious	Male	30-JAN-2023	13-APR-2023	Non-Expedited	76 YR	84 KG	Pharmalex	Healthcare Professional	Not Specified	-	01-FEB-2023	13-APR-2023	US	Not Specified	US-PharmaLex India-2140264	-	-
871	108	22205905	Illuccix	Gallium Ga-68 Gozetotide	Product Used For Unknown Indication	Injection Site Pain	Non-Serious	Non-Serious	Male	23-JAN-2023	13-APR-2023	Non-Expedited	Not Specified	Not Specified	Pharmalex	Healthcare Professional	Not Specified	-	23-JAN-2023	13-APR-2023	US	Not Specified	US-PharmaLex India-2140263	-	-
872	109	22205793	Illuccix	Gallium Ga-68 Gozetotide	Imaging Procedure	Injection Site Pain	Non-Serious	Non-Serious	Male	31-JAN-2023	13-APR-2023	Non-Expedited	78 YR	90.71 KG	Pharmalex	Healthcare Professional	Not Specified	-	31-JAN-2023	13-APR-2023	US	Not Specified	US-PharmaLex India-2140260	-	-
873	110	21858074	Illuccix	Gallium Ga-68 Gozetotide	Product Used For Unknown Indication	Injection Site Discomfort	Non-Serious	Non-Serious	Male	-	13-APR-2023	Non-Expedited	Not Specified	Not Specified	Pharmalex	Healthcare Professional	Not Specified	-	04-JAN-2023	13-JAN-2023	US	Not Specified	US-PharmaLex India-2136684	-	-
874	111	21457355	Illuccix	Gallium Ga-68 Gozetotide	Imaging Procedure	Product Preparation Error;Positron Emission Tomogram Abnormal	Non-Serious	Non-Serious	Male	11-AUG-2022	13-APR-2023	Non-Expedited	85 YR	Not Specified	Pharmalex	Healthcare Professional	Not Specified	-	03-JAN-2023	14-OCT-2022	US	Not Specified	US-PharmaLex India-2133837	-	-
875	112	21457013	Illuccix	Gallium Ga-68 Gozetotide	Imaging Procedure	Product Preparation Error;Positron Emission Tomogram Abnormal	Non-Serious	Non-Serious	Male	18-JUL-2022	13-APR-2023	Non-Expedited	70 YR	Not Specified	Pharmalex	Healthcare Professional	Not Specified	-	03-JAN-2023	14-OCT-2022	US	Not Specified	US-PharmaLex India-2133830	-	-
876	113	21456909	Illuccix	Gallium Ga-68 Gozetotide	Imaging Procedure	Positron Emission Tomogram Abnormal;Product Preparation Error	Non-Serious	Non-Serious	Male	11-AUG-2022	13-APR-2023	Non-Expedited	Not Specified	Not Specified	Pharmalex	Healthcare Professional	Not Specified	-	03-JAN-2023	14-OCT-2022	US	Not Specified	US-PharmaLex India-2133828	-	-
877	114	22203803	Illuccix	Gallium Ga-68 Gozetotide	Imaging Procedure	Injection Site Pain	Non-Serious	Non-Serious	Male	-	12-APR-2023	Non-Expedited	Not Specified	Not Specified	Pharmalex	Healthcare Professional	Not Specified	-	15-MAR-2023	12-APR-2023	US	Not Specified	US-PharmaLex India-2140229	-	-
878	115	22203754	Illuccix	Gallium Ga-68 Gozetotide	Imaging Procedure	Injection Site Pain	Non-Serious	Non-Serious	Male	-	12-APR-2023	Non-Expedited	Not Specified	Not Specified	Pharmalex	Healthcare Professional	Not Specified	-	15-MAR-2023	12-APR-2023	US	Not Specified	US-PharmaLex India-2140226	-	-
879	116	22203679	Illuccix	Gallium Ga-68 Gozetotide	Product Used For Unknown Indication	Injection Site Pain	Non-Serious	Non-Serious	Male	-	12-APR-2023	Non-Expedited	Not Specified	Not Specified	Pharmalex	Healthcare Professional	Not Specified	-	13-MAR-2023	12-APR-2023	US	Not Specified	US-PharmaLex India-2140224	-	-
880	117	22203622	Illuccix	Gallium Ga-68 Gozetotide	Investigation	Burning Sensation	Non-Serious	Non-Serious	Male	-	12-APR-2023	Non-Expedited	Not Specified	Not Specified	Pharmalex	Healthcare Professional	Not Specified	-	03-MAR-2023	12-APR-2023	US	Not Specified	US-PharmaLex India-2140222	-	-
881	118	22203578	Illuccix	Gallium Ga-68 Gozetotide	Investigation	Burning Sensation	Non-Serious	Non-Serious	Male	-	12-APR-2023	Non-Expedited	Not Specified	Not Specified	Pharmalex	Healthcare Professional	Not Specified	-	03-MAR-2023	12-APR-2023	US	Not Specified	US-PharmaLex India-2140220	-	-
882	119	22203533	Illuccix	Gallium Ga-68 Gozetotide	Investigation	Burning Sensation	Non-Serious	Non-Serious	Male	-	12-APR-2023	Non-Expedited	Not Specified	Not Specified	Pharmalex	Healthcare Professional	Not Specified	-	03-MAR-2023	12-APR-2023	US	Not Specified	US-PharmaLex India-2140219	-	-
883	120	22203488	Illuccix	Gallium Ga-68 Gozetotide	Imaging Procedure	Injection Site Pain	Non-Serious	Non-Serious	Male	25-JAN-2023	12-APR-2023	Non-Expedited	Not Specified	Not Specified	Pharmalex	Healthcare Professional	Not Specified	-	25-JAN-2023	12-APR-2023	US	Not Specified	US-PharmaLex India-2140216	-	-
884	121	22203466	Illuccix	Gallium Ga-68 Gozetotide	Imaging Procedure	Injection Site Pain	Non-Serious	Non-Serious	Male	27-JAN-2023	12-APR-2023	Non-Expedited	69 YR	77 KG	Pharmalex	Healthcare Professional	Not Specified	-	27-JAN-2023	12-APR-2023	US	Not Specified	US-PharmaLex India-2140215	-	-
885	122	22202051	Illuccix	Gallium Ga-68 Gozetotide	Product Used For Unknown Indication	Injection Site Pain	Non-Serious	Non-Serious	Male	-	12-APR-2023	Non-Expedited	Not Specified	Not Specified	Pharmalex	Healthcare Professional	Not Specified	-	20-JAN-2023	12-APR-2023	US	Not Specified	US-PharmaLex India-2140195	-	-
886	123	22202019	Illuccix	Gallium Ga-68 Gozetotide	Imaging Procedure	Injection Site Pain	Non-Serious	Non-Serious	Male	16-JAN-2023	12-APR-2023	Non-Expedited	Not Specified	Not Specified	Pharmalex	Healthcare Professional	Not Specified	-	20-JAN-2023	12-APR-2023	US	Not Specified	US-PharmaLex India-2140194	-	-
887	124	22201580	Illuccix	Gallium Ga-68 Gozetotide	Imaging Procedure	Injection Site Pain	Non-Serious	Non-Serious	Male	13-JAN-2023	12-APR-2023	Non-Expedited	Not Specified	Not Specified	Pharmalex	Healthcare Professional	Not Specified	-	20-JAN-2023	12-APR-2023	US	Not Specified	US-PharmaLex India-2140193	-	-
888	125	22201451	Illuccix	Gallium Ga-68 Gozetotide	Imaging Procedure	Chest Pain;Autoscopy;Pain In Extremity;Injection Site Pain;Amnesia	Non-Serious	Non-Serious	Male	04-JAN-2023	12-APR-2023	Non-Expedited	Not Specified	Not Specified	Pharmalex	Healthcare Professional	Not Specified	-	13-JAN-2023	12-APR-2023	US	Not Specified	US-PharmaLex India-2140192	-	-
889	126	22201309	Illuccix	Gallium Ga-68 Gozetotide	Imaging Procedure	Injection Site Pain	Non-Serious	Non-Serious	Male	06-JAN-2023	12-APR-2023	Non-Expedited	60 YR	111.13 KG	Pharmalex	Healthcare Professional	Not Specified	-	11-JAN-2023	12-APR-2023	US	Not Specified	US-PharmaLex India-2140191	-	-
890	127	22201041	Illuccix	Gallium Ga-68 Gozetotide	Imaging Procedure	Injection Site Pain	Non-Serious	Non-Serious	Male	06-JAN-2023	12-APR-2023	Non-Expedited	Not Specified	99.79 KG	Pharmalex	Healthcare Professional	Not Specified	-	11-JAN-2023	12-APR-2023	US	Not Specified	US-PharmaLex India-2140189	-	-
891	128	22200622	Illuccix	Gallium Ga-68 Gozetotide	Product Used For Unknown Indication	Injection Site Discomfort	Non-Serious	Non-Serious	Male	06-JAN-2023	12-APR-2023	Non-Expedited	Not Specified	Not Specified	Pharmalex	Healthcare Professional	Not Specified	-	06-JAN-2023	12-APR-2023	US	Not Specified	US-PharmaLex India-2140187	-	-
892	129	22200583	Illuccix	Gallium Ga-68 Gozetotide	Product Used For Unknown Indication	Injection Site Discomfort	Non-Serious	Non-Serious	Male	06-JAN-2023	12-APR-2023	Non-Expedited	Not Specified	Not Specified	Pharmalex	Healthcare Professional	Not Specified	-	06-JAN-2023	12-APR-2023	US	Not Specified	US-PharmaLex India-2140186	-	-
893	130	21855467	Illuccix	Gallium Ga-68 Gozetotide	Prostate Cancer	Injection Site Pain	Non-Serious	Non-Serious	Male	06-DEC-2022	12-APR-2023	Non-Expedited	79 YR	64.4 KG	Pharmalex	Healthcare Professional	Not Specified	-	03-JAN-2023	12-JAN-2023	US	Not Specified	US-PharmaLex India-2136667	-	-
894	131	21852656	Illuccix	Gallium Ga-68 Gozetotide	Imaging Procedure	Chest Discomfort	Non-Serious	Non-Serious	Male	14-NOV-2022	12-APR-2023	Non-Expedited	69 YR	115.66 KG	Pharmalex	Healthcare Professional	Not Specified	-	03-FEB-2023	12-JAN-2023	US	Not Specified	US-PharmaLex India-2136637	-	-
895	132	21852289	Illuccix	Gallium Ga-68 Gozetotide	Imaging Procedure	Injection Site Haemorrhage	Non-Serious	Non-Serious	Male	-	12-APR-2023	Non-Expedited	Not Specified	Not Specified	Pharmalex	Healthcare Professional	Not Specified	-	13-JAN-2023	12-JAN-2023	US	Not Specified	US-PharmaLex India-2136632	-	-
896	133	22129767	Pluvicto;Locametz	Lutetium Lu-177 Vipivotide Tetraxetan;Gallium Ga-68 Gozetotide;Abiraterone	Back Pain;Basal Cell Carcinoma;Erectile Dysfunction;Gastrooesophageal Reflux Disease;Insomnia;Pain;Product Used For Unknown Indication;Prophylaxis Of Nausea And Vomiting;Prostate Cancer Metastatic;Rhinitis Allergic;Sciatica;Skin Lesion	Alanine Aminotransferase Increased	Serious	Other Outcomes	Male	16-MAR-2023	28-MAR-2023	Expedited	Not Specified	Not Specified	Novartis	Healthcare Professional	Not Specified	Ibuprofen;Ondansetron;Fluorouracil;Morphine;Omeprazole;Acetaminophen;Tadalafil;Pregabalin;Zolpidem;Methylprednisolone;Cannabis Sativa Subsp. Indica Top;Leuprolide;Oxycodone;Xtampza Er;Mupirocin;Fluticasone	17-MAR-2023	23-MAR-2023	US	Not Specified	NVSC2023US063114	-	-
897	134	21949414	Locametz	Gallium Ga-68 Gozetotide	Product Used For Unknown Indication	Pelvic Infection	Serious	Other Outcomes	Not Specified	10-JAN-2023	23-MAR-2023	Expedited	Not Specified	Not Specified	Novartis	Healthcare Professional	Not Specified	-	26-JAN-2023	03-FEB-2023	US	Not Specified	NVSC2023US019639	-	-
898	135	22088325	Locametz	Gallium Ga-68 Gozetotide	Product Used For Unknown Indication	Wrong Product Administered;Product Dispensing Error	Non-Serious	Non-Serious	Not Specified	-	21-MAR-2023	Non-Expedited	Not Specified	Not Specified	Novartis	Consumer	Not Specified	-	07-MAR-2023	13-MAR-2023	US	Not Specified	NVSC2023US054661	-	-
899	136	21492152	-	Abiraterone Acetate;Lutetium Lu-177 Vipivotide Tetraxetan;Gallium Ga-68 Gozetotide	Constipation;Hormone-Refractory Prostate Cancer;Hyperuricaemia;Prophylaxis;Prostate Cancer Metastatic	Intestinal Obstruction	Serious	Hospitalized	Male	15-OCT-2022	03-MAR-2023	Expedited	75 YR	96 KG	Novartis	Healthcare Professional	Not Specified	Allopurinol;Prednisone;Polyethylene Glycols	01-MAR-2023	21-OCT-2022	ES	Not Specified	NVSC2022ES234135	-	-
900	137	21958952	-	Enzalutamide;Gallium Ga-68 Gozetotide;Lutetium Lu-177 Vipivotide Tetraxetan	Arthralgia;Constipation Prophylaxis;General Physical Condition;Hormone-Refractory Prostate Cancer;Hypertension;Neck Pain;Oedema Peripheral;Pain;Prostate Cancer Metastatic	Lung Disorder	Serious	Hospitalized	Male	03-JAN-2023	28-FEB-2023	Expedited	80 YR	62.2 KG	Novartis	Healthcare Professional	Not Specified	Amitriptyline Hydrochloride;Codeine Phosphate;Aldactone;Oxycodone Hydrochloride;Lidocaine;Acetaminophen;Hydrocortisone;Oxycodone;Abiraterone;Polyethylene Glycols;Indapamide\Perindopril	23-FEB-2023	06-FEB-2023	FR	Not Specified	NVSC2023FR025770	-	-
901	138	21660747	Illuccix	Gallium Ga-68 Gozetotide	Imaging Procedure	Syncope	Serious	Other Outcomes	Male	16-NOV-2022	08-FEB-2023	Expedited	73 YR	Not Specified	Pharmalex	Healthcare Professional	Not Specified	-	25-JAN-2023	30-NOV-2022	US	Not Specified	US-PharmaLex India-2135375	-	-
902	139	21283023	Illuccix	Gallium Ga-68 Gozetotide	Prostate Cancer	Loss Of Consciousness;Seizure	Serious	Other Outcomes	Male	29-JUL-2022	31-JAN-2023	Expedited	46 YR	102 KG	Pharmalex	Healthcare Professional	Not Specified	-	31-JAN-2023	01-SEP-2022	US	Not Specified	US-PharmaLex India-2132472	-	-
903	140	21854695	Illuccix	Gallium Ga-68 Gozetotide	Product Used For Unknown Indication	Injection Site Discomfort	Non-Serious	Non-Serious	Male	-	12-JAN-2023	Non-Expedited	Not Specified	Not Specified	Pharmalex	Healthcare Professional	Not Specified	-	09-DEC-2022	12-JAN-2023	US	Not Specified	US-PharmaLex India-2136655	-	-
904	141	21854443	Illuccix	Gallium Ga-68 Gozetotide	Prostate Cancer	Injection Site Pain	Non-Serious	Non-Serious	Male	07-DEC-2022	12-JAN-2023	Non-Expedited	48 YR	86.6 KG	Pharmalex	Healthcare Professional	Not Specified	-	08-DEC-2022	12-JAN-2023	US	Not Specified	US-PharmaLex India-2136651	-	-
905	142	21852706	Illuccix	Gallium Ga-68 Gozetotide	Imaging Procedure	Injection Site Pain	Non-Serious	Non-Serious	Male	15-NOV-2022	12-JAN-2023	Non-Expedited	Not Specified	Not Specified	Pharmalex	Healthcare Professional	Not Specified	-	15-NOV-2022	12-JAN-2023	US	Not Specified	US-PharmaLex India-2136639	-	-
906	143	21852597	Illuccix	Gallium Ga-68 Gozetotide	Imaging Procedure	Injection Site Pain	Non-Serious	Non-Serious	Male	08-NOV-2022	12-JAN-2023	Non-Expedited	43 YR	116.5 KG	Pharmalex	Healthcare Professional	Not Specified	-	09-NOV-2022	12-JAN-2023	US	Not Specified	US-PharmaLex India-2136636	-	-
907	144	21852521	Illuccix	Gallium Ga-68 Gozetotide	-	Injection Site Pain	Non-Serious	Non-Serious	Male	08-NOV-2022	12-JAN-2023	Non-Expedited	68 YR	65.77 KG	Pharmalex	Healthcare Professional	Not Specified	-	09-NOV-2022	12-JAN-2023	US	Not Specified	US-PharmaLex India-2136635	-	-
908	145	21852457	Illuccix	Gallium Ga-68 Gozetotide	Imaging Procedure	Positron Emission Tomogram Abnormal	Non-Serious	Non-Serious	Male	25-OCT-2022	12-JAN-2023	Non-Expedited	70 YR	74.8 KG	Pharmalex	Healthcare Professional	Not Specified	-	26-OCT-2022	12-JAN-2023	US	Not Specified	US-PharmaLex India-2136634	-	-
909	146	21852397	Illuccix	Gallium Ga-68 Gozetotide	-	Injection Site Haemorrhage	Non-Serious	Non-Serious	Male	-	12-JAN-2023	Non-Expedited	Not Specified	Not Specified	Pharmalex	Healthcare Professional	Not Specified	-	21-OCT-2022	12-JAN-2023	US	Not Specified	US-PharmaLex India-2136633	-	-
910	147	21851892	Illuccix	Gallium Ga-68 Gozetotide	-	Injection Site Haemorrhage	Non-Serious	Non-Serious	Not Specified	14-OCT-2022	12-JAN-2023	Non-Expedited	73 YR	77.110 KG	Pharmalex	Healthcare Professional	Not Specified	-	21-OCT-2022	12-JAN-2023	US	Not Specified	US-PharmaLex India-2136629	-	-
911	148	21851855	Illuccix	Gallium Ga-68 Gozetotide	-	Injection Site Pain	Non-Serious	Non-Serious	Male	06-OCT-2022	12-JAN-2023	Non-Expedited	Not Specified	Not Specified	Pharmalex	Healthcare Professional	Not Specified	-	07-OCT-2022	12-JAN-2023	US	Not Specified	US-PharmaLex India-2136628	-	-
912	149	21851809	Illuccix	Gallium Ga-68 Gozetotide	-	Injection Site Pain	Non-Serious	Non-Serious	Male	30-SEP-2022	12-JAN-2023	Non-Expedited	Not Specified	Not Specified	Pharmalex	Healthcare Professional	Not Specified	-	03-OCT-2022	12-JAN-2023	US	Not Specified	US-PharmaLex India-2136626	-	-
913	150	21851738	Illuccix	Gallium Ga-68 Gozetotide	-	Injection Site Pain	Non-Serious	Non-Serious	Male	27-SEP-2022	12-JAN-2023	Non-Expedited	Not Specified	Not Specified	Pharmalex	Healthcare Professional	Not Specified	-	03-OCT-2022	12-JAN-2023	US	Not Specified	US-PharmaLex India-2136625	-	-
914	151	21851681	Illuccix	Gallium Ga-68 Gozetotide	Prostate Cancer	Injection Site Pain	Non-Serious	Non-Serious	Male	27-SEP-2022	12-JAN-2023	Non-Expedited	65 YR	73.02 KG	Pharmalex	Healthcare Professional	Not Specified	-	27-SEP-2022	12-JAN-2023	US	Not Specified	US-PharmaLex India-2136624	-	-
915	152	21456029	Illuccix	Gallium Ga-68 Gozetotide	Imaging Procedure	Injection Site Pain	Non-Serious	Non-Serious	Male	15-SEP-2022	12-JAN-2023	Non-Expedited	85 YR	101 KG	Pharmalex	Healthcare Professional	Not Specified	-	30-NOV-2022	14-OCT-2022	US	Not Specified	US-PharmaLex India-2133814	-	-
916	153	21801825	-	Lutetium Lu-177 Vipivotide Tetraxetan;Gallium Ga-68 Gozetotide	Asthma;Blood Cholesterol;Prostate Cancer Metastatic	Influenza	Serious	Hospitalized	Male	21-DEC-2022	10-JAN-2023	Expedited	76 YR	96.5 KG	Novartis	Healthcare Professional	Not Specified	Simvastatin;Leuprolide Acetate;Albuterol	04-JAN-2023	30-DEC-2022	GB	Not Specified	NVSC2022GB298049	-	-
917	154	20868281	-	Gallium Ga-68 Gozetotide;Lutetium Lu-177 Vipivotide Tetraxetan	Cancer Pain;Hormone-Refractory Prostate Cancer;Hypertriglyceridaemia;Hypothyroidism;Sensory Disturbance	Death	Serious	Hospitalized;Died	Male	09-MAY-2022	18-NOV-2022	Expedited	63 YR	77.6 KG	Novartis	Healthcare Professional	Not Specified	Pregabalin;Euthyrox;Fentanyl Transdermal System;Rosuvastatin	16-NOV-2022	24-MAY-2022	PL	Not Specified	NVSC2022PL116853	-	-
918	155	21527236	-	Enzalutamide;Gallium Ga-68 Gozetotide;Lutetium Lu-177 Vipivotide Tetraxetan	Arthralgia;Asthenia;Hormone-Refractory Prostate Cancer;Prophylaxis;Sciatica	Pulmonary Embolism	Serious	Other Outcomes	Male	25-OCT-2022	11-NOV-2022	Expedited	73 YR	100 KG	Novartis	Healthcare Professional	Not Specified	Acetaminophen;Cholecalciferol;Ketoprofen;Fentanyl;Prednisone;Ixprim;Erythropoietin;Esomeprazole	04-NOV-2022	31-OCT-2022	FR	Not Specified	NVSC2022FR240448	-	-
919	156	20902499	-	Abiraterone Acetate;Lutetium Lu-177 Vipivotide Tetraxetan;Gallium Ga-68 Gozetotide	Gastrointestinal Disorder Prophylaxis;Hormone-Refractory Prostate Cancer;Hypertension;Type 2 Diabetes Mellitus	Syncope	Non-Serious	Non-Serious	Male	20-MAY-2022	07-NOV-2022	Expedited	78 YR	84.7 KG	Novartis	Healthcare Professional	Not Specified	Enalapril;Prednisone;Omeprazole;Gliclazide;Amlodipine;Janumet	04-NOV-2022	01-JUN-2022	ES	Not Specified	NVSC2022ES123984	-	-
920	157	21253048	-	Gallium Ga-68 Gozetotide;Enzalutamide	General Physical Condition;Hormone Refractory Breast Cancer;Hormone-Refractory Prostate Cancer;Neuralgia;Pain Prophylaxis;Prophylaxis	Pain	Serious	Hospitalized;Life Threatening	Male	19-NOV-2021	04-NOV-2022	Expedited	67 YR	72.5 KG	Novartis	Healthcare Professional	Not Specified	Morphine Sulfate;Acetaminophen;Fresubin;Furosemide;Lormetazepam;Morphine;Metamizole	03-NOV-2022	25-AUG-2022	ES	Not Specified	NVSC2021ES267340	-	-
921	158	20854314	Locametz;Pluvicto	Lutetium Lu-177 Vipivotide Tetraxetan;Gallium Ga-68 Gozetotide	Actinic Keratosis;Cancer Pain;Cardiac Failure Congestive;Coronary Artery Disease;Depression;Gastrooesophageal Reflux Disease;Hyperlipidaemia;Hypertension;Parkinson's Disease;Prophylaxis Of Nausea And Vomiting;Prostate Cancer;Prostate Cancer Metastatic;Type 2 Diabetes Mellitus	Visual Impairment	Serious	Hospitalized	Male	13-MAY-2022	20-OCT-2022	Expedited	74 YR	118.5 KG	Novartis	Healthcare Professional	Not Specified	Jardiance;Aspirin;Coreg;Protonix;Lasix;Lipitor;Zofran;Humalog;Semaglutide;Lantus;Sinemet;Cozaar;Ultram;Temovate;Desyrel;Xtandi;Calcium Carbonate	15-OCT-2022	20-MAY-2022	US	Not Specified	NVSC2022US114416	-	-
922	159	21457270	Illuccix	Gallium Ga-68 Gozetotide	Cancer Screening	Dizziness	Non-Serious	Non-Serious	Male	09-MAR-2022	14-OCT-2022	Non-Expedited	80 YR	87.99 KG	Pharmalex	Healthcare Professional	Not Specified	-	06-JUL-2022	14-OCT-2022	US	Not Specified	US-TLX-2022000023	-	-
923	160	21457074	Illuccix	Gallium Ga-68 Gozetotide	Imaging Procedure	Injection Site Pain	Non-Serious	Non-Serious	Male	31-AUG-2022	14-OCT-2022	Non-Expedited	Not Specified	Not Specified	Pharmalex	Healthcare Professional	Not Specified	-	31-AUG-2022	14-OCT-2022	US	Not Specified	US-PharmaLex India-2133832	-	-
924	161	21456937	Illuccix	Gallium Ga-68 Gozetotide	Imaging Procedure	Injection Site Pain	Non-Serious	Non-Serious	Male	31-AUG-2022	14-OCT-2022	Non-Expedited	Not Specified	Not Specified	Pharmalex	Healthcare Professional	Not Specified	-	31-AUG-2022	14-OCT-2022	US	Not Specified	US-PharmaLex India-2133829	-	-
925	162	21456836	Illuccix	Gallium Ga-68 Gozetotide	Diagnostic Procedure	Fatigue	Non-Serious	Non-Serious	Male	02-SEP-2022	14-OCT-2022	Non-Expedited	Not Specified	Not Specified	Pharmalex	Consumer	Not Specified	-	02-SEP-2022	14-OCT-2022	US	Not Specified	US-PharmaLex India-2133827	-	-
926	163	21456608	Illuccix	Gallium Ga-68 Gozetotide	Cancer Screening	Injection Site Pain	Non-Serious	Non-Serious	Male	22-JUL-2022	14-OCT-2022	Non-Expedited	86 YR	101.15 KG	Pharmalex	Healthcare Professional	Not Specified	-	22-JUL-2022	14-OCT-2022	US	Not Specified	US-PharmaLex India-2133825	-	-
927	164	21456517	Illuccix	Gallium Ga-68 Gozetotide	Imaging Procedure	Product Preparation Error;Pain	Non-Serious	Non-Serious	Male	06-SEP-2022	14-OCT-2022	Non-Expedited	Not Specified	Not Specified	Pharmalex	Healthcare Professional	Not Specified	-	08-SEP-2022	14-OCT-2022	US	Not Specified	US-PharmaLex India-2133823	-	-
928	165	21456442	Illuccix	Gallium Ga-68 Gozetotide	Cancer Screening	Injection Site Pain	Non-Serious	Non-Serious	Male	19-JUL-2022	14-OCT-2022	Non-Expedited	80 YR	71.24 KG	Pharmalex	Healthcare Professional	Not Specified	-	19-JUL-2022	14-OCT-2022	US	Not Specified	US-PharmaLex India-2133822	-	-
929	166	21456402	Illuccix	Gallium Ga-68 Gozetotide	Imaging Procedure	Injection Site Discomfort	Non-Serious	Non-Serious	Male	31-AUG-2022	14-OCT-2022	Non-Expedited	Not Specified	Not Specified	Pharmalex	Healthcare Professional	Not Specified	-	08-SEP-2022	14-OCT-2022	US	Not Specified	US-PharmaLex India-2133820	-	-
930	167	21456397	Illuccix	Gallium Ga-68 Gozetotide	Cancer Screening	Injection Site Pain	Non-Serious	Non-Serious	Male	13-JUL-2022	14-OCT-2022	Non-Expedited	Not Specified	Not Specified	Pharmalex	Healthcare Professional	Not Specified	-	19-JUL-2022	14-OCT-2022	US	Not Specified	US-PharmaLex India-2133819	-	-
931	168	21456236	Illuccix	Gallium Ga-68 Gozetotide	Imaging Procedure	Injection Site Pain	Non-Serious	Non-Serious	Male	09-SEP-2022	14-OCT-2022	Non-Expedited	Not Specified	Not Specified	Pharmalex	Healthcare Professional	Not Specified	-	09-SEP-2022	14-OCT-2022	US	Not Specified	US-PharmaLex India-2133818	-	-
932	169	21456198	Illuccix	Gallium Ga-68 Gozetotide	Cancer Screening	Injection Site Pain	Non-Serious	Non-Serious	Male	12-JUL-2022	14-OCT-2022	Non-Expedited	74 YR	97 KG	Pharmalex	Healthcare Professional	Not Specified	-	19-JUL-2022	14-OCT-2022	US	Not Specified	US-PharmaLex India-2133817	-	-
933	170	21456110	Illuccix	Gallium Ga-68 Gozetotide	Product Used For Unknown Indication	Injection Site Pain	Non-Serious	Non-Serious	Male	07-JUL-2022	14-OCT-2022	Non-Expedited	Not Specified	Not Specified	Pharmalex	Healthcare Professional	Not Specified	-	08-JUL-2022	14-OCT-2022	US	Not Specified	US-PharmaLex India-2133816	-	-
934	171	21456108	Illuccix	Gallium Ga-68 Gozetotide	Imaging Procedure	Injection Site Pain	Non-Serious	Non-Serious	Male	08-SEP-2022	14-OCT-2022	Non-Expedited	Not Specified	Not Specified	Pharmalex	Healthcare Professional	Not Specified	-	09-SEP-2022	14-OCT-2022	US	Not Specified	US-PharmaLex India-2133815	-	-
935	172	21456027	Illuccix	Gallium Ga-68 Gozetotide	Product Used For Unknown Indication	Injection Site Pain	Non-Serious	Non-Serious	Male	-	14-OCT-2022	Non-Expedited	Not Specified	Not Specified	Pharmalex	Healthcare Professional	Not Specified	-	01-JUL-2022	14-OCT-2022	US	Not Specified	US-PharmaLex India-2133813	-	-
936	173	21455967	Illuccix	Gallium Ga-68 Gozetotide	-	Injection Site Pain	Non-Serious	Non-Serious	Male	-	14-OCT-2022	Non-Expedited	Not Specified	Not Specified	Pharmalex	Healthcare Professional	Not Specified	-	01-JUL-2022	14-OCT-2022	US	Not Specified	US-PharmaLex India-2133812	-	-
937	174	21455863	Illuccix	Gallium Ga-68 Gozetotide	-	Injection Site Pain	Non-Serious	Non-Serious	Male	-	14-OCT-2022	Non-Expedited	Not Specified	Not Specified	Pharmalex	Healthcare Professional	Not Specified	-	01-JUL-2022	14-OCT-2022	US	Not Specified	US-PharmaLex India-2133811	-	-
938	175	21455798	Illuccix	Gallium Ga-68 Gozetotide	-	Injection Site Pain	Non-Serious	Non-Serious	Male	-	14-OCT-2022	Non-Expedited	Not Specified	Not Specified	Pharmalex	Healthcare Professional	Not Specified	-	01-JUL-2022	14-OCT-2022	US	Not Specified	US-PharmaLex India-2133810	-	-
939	176	21455658	Illuccix	Gallium Ga-68 Gozetotide	-	Injection Site Pain	Non-Serious	Non-Serious	Male	-	14-OCT-2022	Non-Expedited	Not Specified	Not Specified	Pharmalex	Healthcare Professional	Not Specified	-	01-JUL-2022	14-OCT-2022	US	Not Specified	US-PharmaLex India-2133809	-	-
940	177	21455606	Illuccix	Gallium Ga-68 Gozetotide	Imaging Procedure	Burning Sensation	Non-Serious	Non-Serious	Male	16-MAY-2022	14-OCT-2022	Non-Expedited	Not Specified	Not Specified	Pharmalex	Healthcare Professional	Not Specified	-	24-MAY-2022	14-OCT-2022	US	Not Specified	US-TLX-2022000024	-	-
941	178	21194697	Illuccix	Gallium Ga-68 Gozetotide	-	Seizure	Serious	Other Outcomes	Male	29-JUL-2022	10-AUG-2022	Expedited	46 YR	Not Specified	Pharmalex	Healthcare Professional	Not Specified	-	29-JUL-2022	10-AUG-2022	US	Not Specified	US-PharmaLex India-2131677	-	-
942	179	20910376	Illuccix	Gallium Ga-68 Gozetotide	Prostate Cancer	Injection Site Pain;Injection Site Discomfort	Non-Serious	Non-Serious	Male	31-MAY-2022	02-JUN-2022	Direct	49 YR	110.25 KG	Fda-Ctu	Healthcare Professional	Not Specified	-	-	02-JUN-2022	Not Specified	Y	-	-	Yes
943	1	19464682	Lutathera;Sandostatin Lar Depot	Octreotide Acetate;Edotreotide Gallium Ga-68;Lutetium Oxodotreotide Lu-177	Neuroendocrine Tumour;Product Used For Unknown Indication	Drug Intolerance;Dyspnoea;Night Sweats;Fatigue;Blood Chromogranin A Increased;Product Use In Unapproved Indication;Metastases To Bone;Gastrointestinal Disorder;Breast Mass;Metastases To Liver;Death;Retroperitoneal Neoplasm Metastatic;Lymphadenopathy;Breast Cancer;Metastases To Lymph Nodes;Metastases To Breast;Hydronephrosis;Flushing	Serious	Died;Other Outcomes	Female	NOV-2015	26-JUN-2021	Expedited	58 YR	Not Specified	Novartis	Healthcare Professional	Not Specified	Temozolomide;Capecitabine	21-JUN-2021	26-JUN-2021	GB	Not Specified	NVSC2021GB140871	-	-
944	1	24528673	Cardiogen-82	Rubidium Chloride Rb-82	Cardiac Stress Test;Positron Emission Tomogram	Vertigo;Hypertensive Crisis	Serious	Other Outcomes;Hospitalized	Female	10-OCT-2024	21-OCT-2024	Non-Expedited	70 YR	Not Specified	Bracco	Healthcare Professional	Not Specified	Regadenoson	11-OCT-2024	21-OCT-2024	CH	Not Specified	CH-BRACCO-2024CH06433	-	-
945	2	24528637	Cardiogen-82	Rubidium Chloride Rb-82	Cardiac Stress Test;Positron Emission Tomogram	Vertigo;Headache	Serious	Hospitalized	Male	10-OCT-2024	21-OCT-2024	Non-Expedited	52 YR	Not Specified	Bracco	Healthcare Professional	Not Specified	Regadenoson	11-OCT-2024	21-OCT-2024	CH	Not Specified	CH-BRACCO-2024CH06432	-	-
946	3	23433943	Cardiogen-82	Rubidium Chloride Rb-82	Cardiac Stress Test	No Adverse Event;Expired Product Administered	Non-Serious	Non-Serious	Male	31-MAR-2023	23-JAN-2024	Non-Expedited	Not Specified	Not Specified	Bracco	Consumer	Not Specified	-	03-APR-2023	23-JAN-2024	US	Not Specified	US-BRACCO-2023US01619	-	-
947	4	23011695	Ruby-Fill	Rubidium Chloride Rb-82;Unspecified Ingredient	Cardiac Imaging Procedure;Cardiac Pharmacologic Stress Test	Lip Swelling	Non-Serious	Non-Serious	Not Specified	10-AUG-2023	29-SEP-2023	Expedited	Not Specified	71.47 KG	Jubilant	Healthcare Professional	Not Specified	-	11-AUG-2023	29-SEP-2023	US	Not Specified	US-JUBILANT PHARMA LTD-2023US000931	-	-
948	5	22285176	Ruby-Fill	Rubidium Chloride Rb-82	Product Used For Unknown Indication	Incorrect Dose Administered By Device;Product Delivery Mechanism Issue	Non-Serious	Non-Serious	Not Specified	-	29-SEP-2023	Expedited	Not Specified	Not Specified	Jubilant	Healthcare Professional	Not Specified	-	21-SEP-2023	04-MAY-2023	US	Not Specified	US-JUBILANT PHARMA LTD-2023US000066	-	-
949	6	22261080	Ruby-Fill	Rubidium Chloride Rb-82	Scan Myocardial Perfusion	Product Preparation Error	Non-Serious	Non-Serious	Male	19-APR-2023	27-APR-2023	Expedited	Not Specified	Not Specified	Jubilant	Healthcare Professional	Not Specified	-	19-APR-2023	27-APR-2023	US	Not Specified	US-JUBILANT PHARMA LTD-2023US000204	-	-
950	7	22261078	Ruby-Fill	Rubidium Chloride Rb-82	Scan Myocardial Perfusion	Product Preparation Error	Non-Serious	Non-Serious	Male	19-APR-2023	27-APR-2023	Expedited	Not Specified	Not Specified	Jubilant	Healthcare Professional	Not Specified	-	19-APR-2023	27-APR-2023	US	Not Specified	US-JUBILANT PHARMA LTD-2023US000205	-	-
951	8	22256448	Cardiogen-82	Rubidium Chloride Rb-82	Scan Myocardial Perfusion	Product Preparation Error;No Adverse Event	Non-Serious	Non-Serious	Male	12-APR-2023	26-APR-2023	Expedited	67 YR	Not Specified	Bracco	Consumer	Not Specified	Calcium Chloride\Potassium Chloride\Sodium Lactate	17-APR-2023	26-APR-2023	US	Not Specified	US-BRACCO-2023US01810	-	-
952	9	22256444	Cardiogen-82	Rubidium Chloride Rb-82	Scan Myocardial Perfusion	Product Preparation Error;No Adverse Event	Non-Serious	Non-Serious	Female	12-APR-2023	26-APR-2023	Expedited	77 YR	Not Specified	Bracco	Consumer	Not Specified	Calcium Chloride\Potassium Chloride\Sodium Lactate	17-APR-2023	26-APR-2023	US	Not Specified	US-BRACCO-2023US01876	-	-
953	10	22256442	Cardiogen-82	Rubidium Chloride Rb-82	Scan Myocardial Perfusion	No Adverse Event;Product Preparation Error	Non-Serious	Non-Serious	Male	12-APR-2023	26-APR-2023	Expedited	61 YR	Not Specified	Bracco	Consumer	Not Specified	Calcium Chloride\Potassium Chloride\Sodium Lactate	17-APR-2023	26-APR-2023	US	Not Specified	US-BRACCO-2023US01877	-	-
954	11	22256441	Cardiogen-82	Rubidium Chloride Rb-82	Scan Myocardial Perfusion	Product Preparation Error;No Adverse Event	Non-Serious	Non-Serious	Male	12-APR-2023	26-APR-2023	Expedited	57 YR	Not Specified	Bracco	Consumer	Not Specified	Calcium Chloride\Potassium Chloride\Sodium Lactate	17-APR-2023	26-APR-2023	US	Not Specified	US-BRACCO-2023US01873	-	-
955	12	21974664	Cardiogen-82	Rubidium Chloride Rb-82	Scan Myocardial Perfusion	No Adverse Event;Product Preparation Error	Non-Serious	Non-Serious	Male	27-JAN-2023	02-MAR-2023	Expedited	77 YR	Not Specified	Bracco	Healthcare Professional	Not Specified	Lactated Ringers Solution	20-FEB-2023	09-FEB-2023	US	Not Specified	US-BRACCO-2023US00380	-	-
956	13	21974663	Cardiogen-82	Rubidium Chloride Rb-82	Scan Myocardial Perfusion	Product Preparation Error;No Adverse Event	Non-Serious	Non-Serious	Female	27-JAN-2023	02-MAR-2023	Expedited	59 YR	Not Specified	Bracco	Healthcare Professional	Not Specified	Lactated Ringers Solution	20-FEB-2023	09-FEB-2023	US	Not Specified	US-BRACCO-2023US00381	-	-
957	14	21974653	Cardiogen-82	Rubidium Chloride Rb-82	Scan Myocardial Perfusion	No Adverse Event;Product Preparation Error	Non-Serious	Non-Serious	Female	27-JAN-2023	02-MAR-2023	Expedited	40 YR	Not Specified	Bracco	Healthcare Professional	Not Specified	Lactated Ringers Solution	20-FEB-2023	09-FEB-2023	US	Not Specified	US-BRACCO-2023US00379	-	-
958	15	21974642	Cardiogen-82	Rubidium Chloride Rb-82	Scan Myocardial Perfusion	No Adverse Event;Product Preparation Error	Non-Serious	Non-Serious	Male	27-JAN-2023	02-MAR-2023	Expedited	48 YR	Not Specified	Bracco	Healthcare Professional	Not Specified	Lactated Ringers Solution	20-FEB-2023	09-FEB-2023	US	Not Specified	US-BRACCO-2023US00378	-	-
959	16	21974636	Cardiogen-82	Rubidium Chloride Rb-82	Scan Myocardial Perfusion	Product Preparation Error;No Adverse Event	Non-Serious	Non-Serious	Female	27-JAN-2023	02-MAR-2023	Expedited	80 YR	Not Specified	Bracco	Healthcare Professional	Not Specified	Lactated Ringers Solution	20-FEB-2023	09-FEB-2023	US	Not Specified	US-BRACCO-2023US00377	-	-
960	17	21974582	Cardiogen-82	Rubidium Chloride Rb-82	Scan Myocardial Perfusion	Product Preparation Error;No Adverse Event	Non-Serious	Non-Serious	Female	27-JAN-2023	02-MAR-2023	Expedited	70 YR	Not Specified	Bracco	Healthcare Professional	Not Specified	Lactated Ringers Solution	20-FEB-2023	09-FEB-2023	US	Not Specified	US-BRACCO-2023US00375	-	-
961	18	21974484	Cardiogen-82	Rubidium Chloride Rb-82	Scan Myocardial Perfusion	No Adverse Event;Product Preparation Error	Non-Serious	Non-Serious	Female	27-JAN-2023	02-MAR-2023	Expedited	71 YR	Not Specified	Bracco	Healthcare Professional	Not Specified	Lactated Ringers Solution	20-FEB-2023	09-FEB-2023	US	Not Specified	US-BRACCO-2023US00369	-	-
962	19	21480025	Cardiogen-82	Rubidium Chloride Rb-82	Positron Emission Tomogram	Product Preparation Error;No Adverse Event	Non-Serious	Non-Serious	Female	12-OCT-2022	04-NOV-2022	Non-Expedited	Not Specified	Not Specified	Bracco	Healthcare Professional	Not Specified	Sodium Chloride	31-OCT-2022	19-OCT-2022	US	Not Specified	US-BRACCO-2022US04372	-	-
963	20	21480023	Cardiogen-82	Rubidium Chloride Rb-82	Positron Emission Tomogram	No Adverse Event;Product Preparation Error	Non-Serious	Non-Serious	Female	12-OCT-2022	04-NOV-2022	Non-Expedited	Not Specified	Not Specified	Bracco	Healthcare Professional	Not Specified	Sodium Chloride	31-OCT-2022	19-OCT-2022	US	Not Specified	US-BRACCO-2022US04374	-	-
964	21	21480022	Cardiogen-82	Rubidium Chloride Rb-82	Positron Emission Tomogram	Product Preparation Error;No Adverse Event	Non-Serious	Non-Serious	Female	12-OCT-2022	04-NOV-2022	Non-Expedited	Not Specified	Not Specified	Bracco	Healthcare Professional	Not Specified	Sodium Chloride	31-OCT-2022	19-OCT-2022	US	Not Specified	US-BRACCO-2022US04369	-	-
965	22	21480021	Cardiogen-82	Rubidium Chloride Rb-82	Positron Emission Tomogram	Product Preparation Error;No Adverse Event	Non-Serious	Non-Serious	Male	12-OCT-2022	04-NOV-2022	Non-Expedited	Not Specified	Not Specified	Bracco	Healthcare Professional	Not Specified	Sodium Chloride	31-OCT-2022	19-OCT-2022	US	Not Specified	US-BRACCO-2022US04373	-	-
966	23	21485555	Ruby-Fill	Rubidium Chloride Rb-82	Product Used For Unknown Indication	Underdose;Drug Ineffective	Non-Serious	Non-Serious	Not Specified	-	20-OCT-2022	Expedited	Not Specified	Not Specified	Jubilant	Healthcare Professional	Not Specified	-	12-AUG-2022	20-OCT-2022	US	Not Specified	US-JUBILANT PHARMA LTD-2022US000347	-	-
967	24	21453551	Cardiogen-82	Rubidium Chloride Rb-82	Diagnostic Procedure	Intercepted Product Administration Error;No Adverse Event;Product Preparation Error	Non-Serious	Non-Serious	Not Specified	22-SEP-2022	13-OCT-2022	Non-Expedited	Not Specified	Not Specified	Bracco	Consumer	Not Specified	Dextrose	28-SEP-2022	13-OCT-2022	US	Not Specified	US-BRACCO-2022US04289	-	-
968	25	21453550	Cardiogen-82	Rubidium Chloride Rb-82	Diagnostic Procedure	Intercepted Product Administration Error;Product Preparation Error;No Adverse Event	Non-Serious	Non-Serious	Not Specified	22-SEP-2022	13-OCT-2022	Non-Expedited	Not Specified	Not Specified	Bracco	Consumer	Not Specified	Dextrose	28-SEP-2022	13-OCT-2022	US	Not Specified	US-BRACCO-2022US04290	-	-
969	26	21453549	Cardiogen-82	Rubidium Chloride Rb-82	Diagnostic Procedure	No Adverse Event;Product Preparation Error	Non-Serious	Non-Serious	Not Specified	22-SEP-2022	13-OCT-2022	Non-Expedited	Not Specified	Not Specified	Bracco	Consumer	Not Specified	Dextrose	28-SEP-2022	13-OCT-2022	US	Not Specified	US-BRACCO-2022US04291	-	-
970	27	21453548	Cardiogen-82	Rubidium Chloride Rb-82	Diagnostic Procedure	Intercepted Product Administration Error;Product Preparation Error;No Adverse Event	Non-Serious	Non-Serious	Not Specified	22-SEP-2022	13-OCT-2022	Non-Expedited	Not Specified	Not Specified	Bracco	Consumer	Not Specified	Dextrose	28-SEP-2022	13-OCT-2022	US	Not Specified	US-BRACCO-2022US04288	-	-
971	28	21096727	Ruby-Fill	Rubidium Chloride Rb-82	Product Used For Unknown Indication	Drug Ineffective;Underdose	Non-Serious	Non-Serious	Not Specified	-	28-SEP-2022	Non-Expedited	Not Specified	Not Specified	Jubilant	Healthcare Professional	Not Specified	-	01-SEP-2022	18-JUL-2022	US	Not Specified	US-JUBILANT PHARMA LTD-2022US000227	-	-
972	29	21096678	Ruby-Fill	Rubidium Chloride Rb-82	Product Used For Unknown Indication	Underdose;Drug Ineffective	Non-Serious	Non-Serious	Not Specified	-	28-SEP-2022	Non-Expedited	Not Specified	Not Specified	Jubilant	Healthcare Professional	Not Specified	-	01-SEP-2022	18-JUL-2022	US	Not Specified	US-JUBILANT PHARMA LTD-2022US000210	-	-
973	30	21366012	Ruby-Fill	Rubidium Chloride Rb-82	Product Used For Unknown Indication	Drug Ineffective;Underdose	Non-Serious	Non-Serious	Not Specified	-	22-SEP-2022	Non-Expedited	Not Specified	Not Specified	Jubilant	Healthcare Professional	Not Specified	-	27-JUN-2022	22-SEP-2022	US	Not Specified	US-JUBILANT PHARMA LTD-2022US000276	-	-
974	31	20907943	Ruby-Fill	Rubidium Chloride Rb-82	Product Used For Unknown Indication	Underdose;Drug Ineffective	Non-Serious	Non-Serious	Not Specified	-	02-JUN-2022	Non-Expedited	Not Specified	Not Specified	Jubilant	Healthcare Professional	Not Specified	-	04-MAY-2022	02-JUN-2022	US	Not Specified	US-JUBILANT PHARMA LTD-2022US000113	-	-
975	32	20371338	Cardiogen-82	Rubidium Chloride Rb-82	Cardiac Stress Test	Occupational Exposure To Radiation	Non-Serious	Non-Serious	Female	16-FEB-2021	24-JAN-2022	Non-Expedited	Not Specified	Not Specified	Bracco	Healthcare Professional	Not Specified	Sodium Chloride	16-FEB-2021	24-JAN-2022	US	Not Specified	US-BRACCO-2021US00622	-	-
976	33	20367141	Cardiogen-82	Rubidium Chloride Rb-82	Positron Emission Tomogram	No Adverse Event;Expired Product Administered	Non-Serious	Non-Serious	Female	12-APR-2021	23-JAN-2022	Non-Expedited	79 YR	Not Specified	Bracco	Consumer	Not Specified	-	16-APR-2021	23-JAN-2022	US	Not Specified	US-BRACCO-2021US01562	-	-
977	34	20367140	Cardiogen-82	Rubidium Chloride Rb-82	Positron Emission Tomogram	Positron Emission Tomogram Abnormal	Non-Serious	Non-Serious	Female	13-NOV-2020	23-JAN-2022	Non-Expedited	52 YR	Not Specified	Bracco	Consumer	Not Specified	-	08-DEC-2020	23-JAN-2022	US	Not Specified	US-BRACCO-2020US05049	-	-
978	35	20367139	Cardiogen-82	Rubidium Chloride Rb-82	Positron Emission Tomogram	No Adverse Event;Expired Product Administered	Non-Serious	Non-Serious	Male	12-APR-2021	23-JAN-2022	Non-Expedited	64 YR	Not Specified	Bracco	Consumer	Not Specified	-	16-APR-2021	23-JAN-2022	US	Not Specified	US-BRACCO-2021US01486	-	-
979	36	20367138	Cardiogen-82	Rubidium Chloride Rb-82	Scan Myocardial Perfusion	No Adverse Event;Expired Product Administered	Non-Serious	Non-Serious	Male	22-JAN-2021	23-JAN-2022	Non-Expedited	64 YR	Not Specified	Bracco	Healthcare Professional	Not Specified	-	28-JAN-2021	23-JAN-2022	US	Not Specified	US-BRACCO-2021US00289	-	-
980	37	20367137	Cardiogen-82	Rubidium Chloride Rb-82	Diagnostic Procedure	Incorrect Dose Administered;Device Use Error	Non-Serious	Non-Serious	Female	OCT-2020	23-JAN-2022	Non-Expedited	Not Specified	Not Specified	Bracco	Healthcare Professional	Not Specified	-	06-JAN-2021	23-JAN-2022	US	Not Specified	US-BRACCO-2021US03165	-	-
981	38	20367136	Cardiogen-82	Rubidium Chloride Rb-82	Diagnostic Procedure	Wrong Technique In Product Usage Process;Intercepted Medication Error	Non-Serious	Non-Serious	Not Specified	03-MAY-2021	23-JAN-2022	Non-Expedited	Not Specified	Not Specified	Bracco	Consumer	Not Specified	-	03-MAY-2021	23-JAN-2022	US	Not Specified	US-BRACCO-2021US01890	-	-
982	39	20367135	Cardiogen-82	Rubidium Chloride Rb-82	Diagnostic Procedure	No Adverse Event;Expired Product Administered	Non-Serious	Non-Serious	Not Specified	17-JUN-2021	23-JAN-2022	Non-Expedited	Not Specified	Not Specified	Bracco	Consumer	Not Specified	-	18-JUN-2021	23-JAN-2022	US	Not Specified	US-BRACCO-2021US02622	-	-
983	40	20367134	Cardiogen-82	Rubidium Chloride Rb-82	Diagnostic Procedure	Extravasation;Drug Ineffective	Non-Serious	Non-Serious	Female	08-FEB-2021	23-JAN-2022	Non-Expedited	Not Specified	Not Specified	Bracco	Consumer	Not Specified	-	25-FEB-2021	23-JAN-2022	US	Not Specified	US-BRACCO-2021US00768	-	-
984	41	20367133	Cardiogen-82	Rubidium Chloride Rb-82	Scan Myocardial Perfusion	No Adverse Event;Expired Product Administered	Non-Serious	Non-Serious	Female	22-JAN-2021	23-JAN-2022	Non-Expedited	62 YR	Not Specified	Bracco	Healthcare Professional	Not Specified	-	28-JAN-2021	23-JAN-2022	US	Not Specified	US-BRACCO-2021US00291	-	-
985	42	20098113	Ruby-Fill	Rubidium Chloride Rb-82	Scan Myocardial Perfusion	Underdose;Device Use Error;Drug Ineffective	Non-Serious	Non-Serious	Not Specified	14-JUL-2021	22-NOV-2021	Non-Expedited	Not Specified	Not Specified	Jubilant	Healthcare Professional	Not Specified	-	14-JUL-2021	22-NOV-2021	US	Not Specified	US-JUBILANT PHARMA LTD-2021US000632	-	-
986	43	18753111	Cardiogen-82	Rubidium Chloride Rb-82	Positron Emission Tomogram	Hypersensitivity	Non-Serious	Non-Serious	Female	11-FEB-2020	18-JAN-2021	Non-Expedited	77 YR	Not Specified	Bracco	Consumer	Not Specified	Lopressor;Benicar;Crestor;Aspirin;Sodium Chloride	12-FEB-2020	18-JAN-2021	US	Not Specified	US-BRACCO-2020US00701	-	-
987	44	18753107	Cardiogen-82	Rubidium Chloride Rb-82	Cardiac Imaging Procedure	Occupational Exposure To Radiation	Non-Serious	Non-Serious	Not Specified	28-OCT-2020	18-JAN-2021	Non-Expedited	Not Specified	Not Specified	Bracco	Consumer	Not Specified	-	29-OCT-2020	18-JAN-2021	US	Not Specified	US-BRACCO-2020US04479	-	-
988	45	18274163	Cardiogen-82	Rubidium Chloride Rb-82	Diagnostic Procedure	Intercepted Medication Error;Wrong Technique In Product Usage Process	Non-Serious	Non-Serious	Not Specified	10-SEP-2020	18-JAN-2021	Non-Expedited	Not Specified	Not Specified	Bracco	Consumer	Not Specified	-	12-OCT-2020	16-SEP-2020	US	Not Specified	US-BRACCO-2020US03809	-	-
989	46	17327123	Cardiogen-82	Rubidium Chloride Rb-82	Positron Emission Tomogram	Wrong Technique In Product Usage Process;No Adverse Event	Non-Serious	Non-Serious	Not Specified	14-JUN-2019	18-JAN-2021	Non-Expedited	Not Specified	Not Specified	Bracco	Consumer	Not Specified	-	17-JUN-2019	27-JAN-2020	US	Not Specified	US-BRACCO-2019US03077	-	-
990	47	8068724	Cardiogen-82	Rubidium Chloride Rb-82	Coronary Artery Disease;Scan Myocardial Perfusion	Exposure To Radiation;Influenza Like Illness	Serious	Other Outcomes	Male	17-FEB-2011	18-JAN-2021	Expedited	77 YR	Not Specified	Bracco	Consumer	Not Specified	Omeprazole;Crestor;Fish Oil;Carisoprodol;Aspirin	09-JUN-2011	22-JUN-2011	US	Not Specified	US-BRACCO-006332	-	-
991	48	8068477	Cardiogen-82	Rubidium Chloride Rb-82	Angiogram;Positron Emission Tomogram	Exposure To Radiation	Serious	Other Outcomes	Male	14-MAR-2011	18-JAN-2021	Expedited	Not Specified	Not Specified	Bracco	Healthcare Professional	Not Specified	-	24-SEP-2012	16-JUN-2011	US	Not Specified	US-BRACCO-006312	-	-
992	49	18422017	Cardiogen-82	Rubidium Chloride Rb-82	Positron Emission Tomogram	Expired Product Administered;No Adverse Event	Serious	Other Outcomes	Female	16-OCT-2020	24-NOV-2020	Expedited	79 YR	Not Specified	Bracco	Consumer	Not Specified	-	18-NOV-2020	23-OCT-2020	US	Not Specified	US-BRACCO-2020US04340	-	-
993	50	18421985	Cardiogen-82	Rubidium Chloride Rb-82	Positron Emission Tomogram	No Adverse Event;Expired Product Administered	Serious	Other Outcomes	Male	16-OCT-2020	24-NOV-2020	Expedited	78 YR	Not Specified	Bracco	Consumer	Not Specified	-	18-NOV-2020	23-OCT-2020	US	Not Specified	US-BRACCO-2020US04310	-	-
994	51	18533567	Cardiogen-82	Rubidium Chloride Rb-82;Rubidium Rb-82	-	Device Use Error;Incorrect Dose Administered By Device	Non-Serious	Non-Serious	Not Specified	-	20-NOV-2020	Direct	Not Specified	Not Specified	Fda-Ctu	Healthcare Professional	Health Professional	-	-	20-NOV-2020	US	Not Specified	-	-	-
995	52	18378282	Ruby-Fill	Rubidium Chloride Rb-82	Scan Myocardial Perfusion	Back Pain;Pain;Sleep Disorder;Renal Pain;Decreased Appetite;Paraesthesia;Headache	Serious	Other Outcomes	Female	-	13-OCT-2020	Expedited	55 YR	Not Specified	Jubilant	Consumer	Not Specified	-	20-AUG-2020	13-OCT-2020	CA	Not Specified	CA-JUBILANT PHARMA LTD-2020CA000680	-	-
996	53	18098813	Ruby-Fill	Rubidium Chloride Rb-82	Scan Myocardial Perfusion	Product Preparation Error	Non-Serious	Non-Serious	Female	15-JUL-2020	31-JUL-2020	Expedited	78 YR	Not Specified	Jubilant	Healthcare Professional	Not Specified	-	15-JUL-2020	31-JUL-2020	CA	Not Specified	CA-JUBILANT PHARMA LTD-2020CA000631	-	-
997	54	18098812	Ruby-Fill	Rubidium Chloride Rb-82	Scan Myocardial Perfusion	Product Preparation Error	Non-Serious	Non-Serious	Female	15-JUL-2020	31-JUL-2020	Expedited	79 YR	Not Specified	Jubilant	Healthcare Professional	Not Specified	-	15-JUL-2020	31-JUL-2020	CA	Not Specified	CA-JUBILANT PHARMA LTD-2020CA000637	-	-
998	55	18098804	Ruby-Fill	Rubidium Chloride Rb-82	Scan Myocardial Perfusion	Product Preparation Error	Non-Serious	Non-Serious	Male	15-JUL-2020	31-JUL-2020	Expedited	70 YR	Not Specified	Jubilant	Healthcare Professional	Not Specified	-	15-JUL-2020	31-JUL-2020	CA	Not Specified	CA-JUBILANT PHARMA LTD-2020CA000620	-	-
999	56	18098803	Ruby-Fill	Rubidium Chloride Rb-82	Scan Myocardial Perfusion	Product Preparation Error	Non-Serious	Non-Serious	Male	15-JUL-2020	31-JUL-2020	Expedited	76 YR	Not Specified	Jubilant	Healthcare Professional	Not Specified	-	15-JUL-2020	31-JUL-2020	CA	Not Specified	CA-JUBILANT PHARMA LTD-2020CA000634	-	-
1000	57	18098801	Ruby-Fill	Rubidium Chloride Rb-82	Scan Myocardial Perfusion	Product Preparation Error	Non-Serious	Non-Serious	Female	15-JUL-2020	31-JUL-2020	Expedited	77 YR	Not Specified	Jubilant	Healthcare Professional	Not Specified	-	15-JUL-2020	31-JUL-2020	CA	Not Specified	CA-JUBILANT PHARMA LTD-2020CA000633	-	-
1001	58	18098800	Ruby-Fill	Rubidium Chloride Rb-82	Scan Myocardial Perfusion	Product Preparation Error	Non-Serious	Non-Serious	Male	15-JUL-2020	31-JUL-2020	Expedited	55 YR	Not Specified	Jubilant	Healthcare Professional	Not Specified	-	15-JUL-2020	31-JUL-2020	CA	Not Specified	CA-JUBILANT PHARMA LTD-2020CA000632	-	-
1002	59	18098799	Ruby-Fill	Rubidium Chloride Rb-82	Scan Myocardial Perfusion	Product Preparation Error	Non-Serious	Non-Serious	Female	15-JUL-2020	31-JUL-2020	Expedited	60 YR	Not Specified	Jubilant	Healthcare Professional	Not Specified	-	15-JUL-2020	31-JUL-2020	CA	Not Specified	CA-JUBILANT PHARMA LTD-2020CA000635	-	-
1003	60	18098798	Ruby-Fill	Rubidium Chloride Rb-82	Scan Myocardial Perfusion	Product Preparation Error	Non-Serious	Non-Serious	Male	15-JUL-2020	31-JUL-2020	Expedited	70 YR	Not Specified	Jubilant	Healthcare Professional	Not Specified	-	15-JUL-2020	31-JUL-2020	CA	Not Specified	CA-JUBILANT PHARMA LTD-2020CA000630	-	-
1004	61	18098793	Ruby-Fill	Rubidium Chloride Rb-82	Scan Myocardial Perfusion	Product Preparation Error	Non-Serious	Non-Serious	Female	15-JUL-2020	31-JUL-2020	Expedited	76 YR	Not Specified	Jubilant	Healthcare Professional	Not Specified	-	15-JUL-2020	31-JUL-2020	CA	Not Specified	CA-JUBILANT PHARMA LTD-2020CA000628	-	-
1005	62	18098792	Ruby-Fill	Rubidium Chloride Rb-82	Scan Myocardial Perfusion	Product Preparation Error	Non-Serious	Non-Serious	Male	15-JUL-2020	31-JUL-2020	Expedited	52 YR	Not Specified	Jubilant	Healthcare Professional	Not Specified	-	15-JUL-2020	31-JUL-2020	CA	Not Specified	CA-JUBILANT PHARMA LTD-2020CA000636	-	-
1006	63	18098789	Ruby-Fill	Rubidium Chloride Rb-82	Scan Myocardial Perfusion	Product Preparation Error	Non-Serious	Non-Serious	Male	15-JUL-2020	31-JUL-2020	Expedited	81 YR	Not Specified	Jubilant	Healthcare Professional	Not Specified	-	15-JUL-2020	31-JUL-2020	CA	Not Specified	CA-JUBILANT PHARMA LTD-2020CA000629	-	-
1007	64	18017801	Ruby-Fill	Rubidium Chloride Rb-82;Camphor (Synthetic)\Menthol\Methyl Salicylate	Back Pain;Cardiac Pharmacologic Stress Test;Scan Myocardial Perfusion	Rash	Non-Serious	Non-Serious	Male	01-JUN-2020	13-JUL-2020	Non-Expedited	Not Specified	Not Specified	Jubilant	Healthcare Professional	Not Specified	Regadenoson	01-JUN-2020	13-JUL-2020	US	Not Specified	US-JUBILANT PHARMA LTD-2020US000461	-	-
1008	65	17868722	Cardiogen-82	Rubidium Chloride Rb-82	Positron Emission Tomogram	Expired Product Administered;No Adverse Event	Serious	Other Outcomes	Female	28-MAY-2020	30-JUN-2020	Expedited	62 YR	Not Specified	Bracco	Healthcare Professional	Not Specified	-	26-JUN-2020	07-JUN-2020	US	Not Specified	US-BRACCO-2020US02198	-	-
1009	66	17868720	Cardiogen-82	Rubidium Chloride Rb-82	Positron Emission Tomogram	Expired Product Administered;No Adverse Event	Serious	Other Outcomes	Female	28-MAY-2020	30-JUN-2020	Expedited	76 YR	Not Specified	Bracco	Healthcare Professional	Not Specified	-	26-JUN-2020	07-JUN-2020	US	Not Specified	US-BRACCO-2020US02197	-	-
1010	67	17868719	Cardiogen-82	Rubidium Chloride Rb-82	Positron Emission Tomogram	Expired Product Administered;No Adverse Event	Serious	Other Outcomes	Male	28-MAY-2020	30-JUN-2020	Expedited	71 YR	Not Specified	Bracco	Healthcare Professional	Not Specified	-	26-JUN-2020	07-JUN-2020	US	Not Specified	US-BRACCO-2020US02196	-	-
1011	68	17868718	Cardiogen-82	Rubidium Chloride Rb-82	Positron Emission Tomogram	Expired Product Administered;No Adverse Event	Serious	Other Outcomes	Female	28-MAY-2020	30-JUN-2020	Expedited	71 YR	Not Specified	Bracco	Healthcare Professional	Not Specified	-	26-JUN-2020	07-JUN-2020	US	Not Specified	US-BRACCO-2020US02194	-	-
1012	69	17868717	Cardiogen-82	Rubidium Chloride Rb-82	Positron Emission Tomogram	No Adverse Event;Expired Product Administered	Serious	Other Outcomes	Male	28-MAY-2020	30-JUN-2020	Expedited	79 YR	Not Specified	Bracco	Healthcare Professional	Not Specified	-	26-JUN-2020	07-JUN-2020	US	Not Specified	US-BRACCO-2020US02193	-	-
1013	70	17868716	Cardiogen-82	Rubidium Chloride Rb-82	Positron Emission Tomogram	Expired Product Administered;No Adverse Event	Serious	Other Outcomes	Male	28-MAY-2020	30-JUN-2020	Expedited	79 YR	Not Specified	Bracco	Healthcare Professional	Not Specified	-	26-JUN-2020	07-JUN-2020	US	Not Specified	US-BRACCO-2020US02192	-	-
1014	71	17866243	Cardiogen-82	Rubidium Chloride Rb-82	Positron Emission Tomogram	No Adverse Event;Expired Product Administered	Serious	Other Outcomes	Female	28-MAY-2020	30-JUN-2020	Expedited	67 YR	Not Specified	Bracco	Healthcare Professional	Not Specified	-	26-JUN-2020	05-JUN-2020	US	Not Specified	US-BRACCO-2020US02199	-	-
1015	72	17866206	Cardiogen-82	Rubidium Chloride Rb-82	Positron Emission Tomogram	No Adverse Event;Expired Product Administered	Serious	Other Outcomes	Male	28-MAY-2020	30-JUN-2020	Expedited	69 YR	Not Specified	Bracco	Healthcare Professional	Not Specified	-	26-JUN-2020	05-JUN-2020	US	Not Specified	US-BRACCO-2020US02195	-	-
1016	73	15767334	Cardiogen-82	Rubidium Chloride Rb-82	Cardiac Stress Test	Wrong Technique In Product Usage Process;No Adverse Event;Radiation Overdose	Serious	Other Outcomes	Male	17-DEC-2018	04-MAR-2020	Expedited	67 YR	Not Specified	Bracco	Healthcare Professional	Not Specified	-	21-FEB-2020	27-DEC-2018	US	Not Specified	US-BRACCO-2018US06615	-	-
1017	74	15767333	Cardiogen-82	Rubidium Chloride Rb-82	Cardiac Stress Test	Radiation Overdose;Wrong Technique In Product Usage Process;No Adverse Event	Serious	Other Outcomes	Male	17-DEC-2018	04-MAR-2020	Expedited	65 YR	Not Specified	Bracco	Healthcare Professional	Not Specified	-	21-FEB-2020	27-DEC-2018	US	Not Specified	US-BRACCO-2018US06616	-	-
1018	75	15767315	Cardiogen-82	Rubidium Chloride Rb-82	Cardiac Stress Test	No Adverse Event;Wrong Technique In Product Usage Process;Radiation Overdose	Serious	Other Outcomes	Female	17-DEC-2018	04-MAR-2020	Expedited	59 YR	Not Specified	Bracco	Healthcare Professional	Not Specified	-	21-FEB-2020	27-DEC-2018	US	Not Specified	US-BRACCO-2018US06614	-	-
1019	76	15767314	Cardiogen-82	Rubidium Chloride Rb-82	Cardiac Stress Test	No Adverse Event;Wrong Technique In Product Usage Process;Radiation Overdose	Serious	Other Outcomes	Female	17-DEC-2018	04-MAR-2020	Expedited	55 YR	Not Specified	Bracco	Healthcare Professional	Not Specified	-	21-FEB-2020	27-DEC-2018	US	Not Specified	US-BRACCO-2018US06613	-	-
1020	77	15767309	Cardiogen-82	Rubidium Chloride Rb-82	Cardiac Stress Test	Radiation Overdose;No Adverse Event;Wrong Technique In Product Usage Process	Serious	Other Outcomes	Female	16-DEC-2018	04-MAR-2020	Expedited	58 YR	Not Specified	Bracco	Healthcare Professional	Not Specified	-	21-FEB-2020	27-DEC-2018	US	Not Specified	US-BRACCO-2018US06612	-	-
1021	78	15767303	Cardiogen-82	Rubidium Chloride Rb-82	Cardiac Stress Test	Wrong Technique In Product Usage Process;Radiation Overdose;No Adverse Event	Serious	Other Outcomes	Male	16-DEC-2018	04-MAR-2020	Expedited	63 YR	Not Specified	Bracco	Healthcare Professional	Not Specified	-	21-FEB-2020	27-DEC-2018	US	Not Specified	US-BRACCO-2018US06583	-	-
1022	79	15767302	Cardiogen-82	Rubidium Chloride Rb-82	Cardiac Stress Test	No Adverse Event;Wrong Technique In Product Usage Process;Radiation Overdose	Serious	Other Outcomes	Male	15-DEC-2018	04-MAR-2020	Expedited	84 YR	Not Specified	Bracco	Healthcare Professional	Not Specified	-	21-FEB-2020	27-DEC-2018	US	Not Specified	US-BRACCO-2018US06581	-	-
1023	80	15767301	Cardiogen-82	Rubidium Chloride Rb-82	Cardiac Stress Test	No Adverse Event;Radiation Overdose;Wrong Technique In Product Usage Process	Serious	Other Outcomes	Male	15-DEC-2018	04-MAR-2020	Expedited	82 YR	Not Specified	Bracco	Healthcare Professional	Not Specified	-	21-FEB-2020	27-DEC-2018	US	Not Specified	US-BRACCO-2018US06582	-	-
1024	81	17327115	Cardiogen-82	Rubidium Chloride Rb-82	Positron Emission Tomogram	Off Label Use	Non-Serious	Non-Serious	Not Specified	20-SEP-2019	27-JAN-2020	Non-Expedited	8 YR	Not Specified	Bracco	Healthcare Professional	Not Specified	-	22-OCT-2019	27-JAN-2020	US	Not Specified	US-BRACCO-2019US05339	-	-
1025	82	16680405	Cardiogen-82	Rubidium Chloride Rb-82	Diagnostic Procedure	Expired Product Administered;No Adverse Event	Non-Serious	Non-Serious	Male	06-JUN-2019	27-JAN-2020	Non-Expedited	72 YR	Not Specified	Bracco	Healthcare Professional	Not Specified	-	07-JUN-2019	07-AUG-2019	US	Not Specified	US-BRACCO-2019US02929	-	-
1026	83	16680404	Cardiogen-82	Rubidium Chloride Rb-82	Diagnostic Procedure	No Adverse Event;Expired Product Administered	Non-Serious	Non-Serious	Male	06-JUN-2019	27-JAN-2020	Non-Expedited	57 YR	Not Specified	Bracco	Healthcare Professional	Not Specified	-	07-JUN-2019	07-AUG-2019	US	Not Specified	US-BRACCO-2019US02930	-	-
1027	84	16680403	Cardiogen-82	Rubidium Chloride Rb-82	Cardiac Stress Test	No Adverse Event;Device Malfunction;Underdose	Non-Serious	Non-Serious	Male	30-APR-2019	27-JAN-2020	Non-Expedited	Not Specified	Not Specified	Bracco	Healthcare Professional	Not Specified	-	01-MAY-2019	07-AUG-2019	US	Not Specified	US-BRACCO-2019US02202	-	-
1028	85	16875197	Ruby-Fill	Rubidium Chloride Rb-82	Scan Myocardial Perfusion	Product Preparation Error	Non-Serious	Non-Serious	Male	17-SEP-2019	02-OCT-2019	Expedited	62 YR	Not Specified	Jubilant	Healthcare Professional	Not Specified	-	17-SEP-2019	01-OCT-2019	US	Not Specified	US-JUBILANT PHARMA LTD-2019US000979	-	-
1029	86	16875198	Ruby-Fill	Rubidium Chloride Rb-82	Scan Myocardial Perfusion	Product Preparation Error	Non-Serious	Non-Serious	Female	17-SEP-2019	01-OCT-2019	Expedited	77 YR	Not Specified	Jubilant	Healthcare Professional	Not Specified	-	17-SEP-2019	01-OCT-2019	US	Not Specified	US-JUBILANT PHARMA LTD-2019US000977	-	-
1030	87	16875196	Ruby-Fill	Rubidium Chloride Rb-82	Scan Myocardial Perfusion	Product Preparation Error	Non-Serious	Non-Serious	Male	17-SEP-2019	01-OCT-2019	Expedited	56 YR	Not Specified	Jubilant	Healthcare Professional	Not Specified	-	17-SEP-2019	01-OCT-2019	US	Not Specified	US-JUBILANT PHARMA LTD-2019US000978	-	-
1031	88	16336984	Cardiogen-82	Rubidium Chloride Rb-82	Positron Emission Tomogram	Wrong Technique In Product Usage Process;No Adverse Event	Serious	Other Outcomes	Male	15-MAY-2019	12-AUG-2019	Expedited	72 YR	Not Specified	Bracco	Healthcare Professional	Not Specified	-	09-AUG-2019	21-MAY-2019	US	Not Specified	US-BRACCO-2019US02478	-	-
1032	89	16123388	Cardiogen-82	Rubidium Chloride Rb-82	Diagnostic Procedure	Wrong Technique In Product Usage Process;No Adverse Event	Serious	Other Outcomes	Male	21-MAR-2019	01-APR-2019	Expedited	Not Specified	Not Specified	Bracco	Healthcare Professional	Not Specified	-	27-MAR-2019	27-MAR-2019	US	Not Specified	US-BRACCO-2019US01455	-	-
1033	90	16123387	Cardiogen-82	Rubidium Chloride Rb-82	Diagnostic Procedure	Wrong Technique In Product Usage Process;No Adverse Event	Serious	Other Outcomes	Female	21-MAR-2019	01-APR-2019	Expedited	Not Specified	Not Specified	Bracco	Healthcare Professional	Not Specified	-	27-MAR-2019	27-MAR-2019	US	Not Specified	US-BRACCO-2019US01456	-	-
1034	91	16123378	Cardiogen-82	Rubidium Chloride Rb-82	Diagnostic Procedure	Wrong Technique In Product Usage Process;No Adverse Event	Serious	Other Outcomes	Female	21-MAR-2019	01-APR-2019	Expedited	Not Specified	Not Specified	Bracco	Healthcare Professional	Not Specified	-	27-MAR-2019	27-MAR-2019	US	Not Specified	US-BRACCO-2019US01453	-	-
1035	92	16123376	Cardiogen-82	Rubidium Chloride Rb-82	Diagnostic Procedure	Wrong Technique In Product Usage Process;No Adverse Event	Serious	Other Outcomes	Male	21-MAR-2019	01-APR-2019	Expedited	Not Specified	Not Specified	Bracco	Healthcare Professional	Not Specified	-	27-MAR-2019	27-MAR-2019	US	Not Specified	US-BRACCO-2019US01454	-	-
1036	93	15885242	Cardiogen-82	Rubidium Chloride Rb-82	-	Occupational Exposure To Radiation	Non-Serious	Non-Serious	Not Specified	-	29-JAN-2019	Non-Expedited	Not Specified	Not Specified	Bracco	Healthcare Professional	Not Specified	-	19-NOV-2018	29-JAN-2019	US	Not Specified	US-BRACCO-2018US06794	-	-
1037	94	15885226	Cardiogen-82	Rubidium Chloride Rb-82	Diagnostic Procedure	No Adverse Event;Expired Product Administered	Non-Serious	Non-Serious	Not Specified	20-JUN-2018	29-JAN-2019	Non-Expedited	Not Specified	Not Specified	Bracco	Healthcare Professional	Not Specified	-	22-JUN-2018	29-JAN-2019	US	Not Specified	US-BRACCO-2018US03397	-	-
1038	95	15885225	Cardiogen-82	Rubidium Chloride Rb-82	Diagnostic Procedure	No Adverse Event;Wrong Technique In Product Usage Process	Non-Serious	Non-Serious	Not Specified	DEC-2017	29-JAN-2019	Non-Expedited	Not Specified	Not Specified	Bracco	Healthcare Professional	Not Specified	-	06-DEC-2017	29-JAN-2019	US	Not Specified	US-BRACCO-2017US05677	-	-
1039	96	15885224	Cardiogen-82	Rubidium Chloride Rb-82	-	Circumstance Or Information Capable Of Leading To Device Use Error;Overdose	Non-Serious	Non-Serious	Not Specified	-	29-JAN-2019	Non-Expedited	Not Specified	Not Specified	Bracco	Healthcare Professional	Not Specified	-	19-NOV-2018	29-JAN-2019	US	Not Specified	US-BRACCO-2018US06644	-	-
1040	97	15885223	Cardiogen-82	Rubidium Chloride Rb-82	Cardiac Stress Test	Therapeutic Response Unexpected	Non-Serious	Non-Serious	Female	-	29-JAN-2019	Non-Expedited	Not Specified	Not Specified	Bracco	Healthcare Professional	Not Specified	-	16-APR-2018	29-JAN-2019	US	Not Specified	US-BRACCO-2018US02775	-	-
1041	98	15885222	Cardiogen-82	Rubidium Chloride Rb-82	Diagnostic Procedure	Drug Ineffective	Non-Serious	Non-Serious	Not Specified	-	29-JAN-2019	Non-Expedited	Not Specified	Not Specified	Bracco	Healthcare Professional	Not Specified	-	06-APR-2018	29-JAN-2019	US	Not Specified	US-BRACCO-2018US01915	-	-
1042	99	15881908	Cardiogen-82	Rubidium Chloride Rb-82	Diagnostic Procedure	Expired Product Administered;No Adverse Event	Non-Serious	Non-Serious	Female	24-JUN-2018	28-JAN-2019	Non-Expedited	82 YR	Not Specified	Bracco	Healthcare Professional	Not Specified	-	26-JUN-2018	28-JAN-2019	US	Not Specified	US-BRACCO-2018US03442	-	-
1043	100	15881906	Cardiogen-82	Rubidium Chloride Rb-82	-	Therapeutic Response Unexpected	Non-Serious	Non-Serious	Not Specified	-	28-JAN-2019	Non-Expedited	Not Specified	Not Specified	Bracco	Healthcare Professional	Not Specified	-	17-AUG-2018	28-JAN-2019	US	Not Specified	US-BRACCO-2018US04417	-	-
1044	101	15881904	Cardiogen-82	Rubidium Chloride Rb-82	Cardiac Stress Test	Therapeutic Product Effect Decreased	Non-Serious	Non-Serious	Female	13-JUL-2018	28-JAN-2019	Non-Expedited	68 YR	Not Specified	Bracco	Healthcare Professional	Not Specified	-	16-JUL-2018	28-JAN-2019	US	Not Specified	US-BRACCO-2018US03810	-	-
1045	102	15894958	Cardiogen-82	Rubidium Chloride Rb-82	Computerised Tomogram	Product Preparation Error	Non-Serious	Non-Serious	Not Specified	15-DEC-2018	10-JAN-2019	Direct	Not Specified	Not Specified	Fda-Ctu	Healthcare Professional	Health Professional	Cardiogen-82	-	10-JAN-2019	US	Y	-	-	-
1046	103	14774668	Lexiscan	Regadenoson;Rubidium Chloride Rb-82	Product Used For Unknown Indication	Vomiting;Nausea	Non-Serious	Non-Serious	Female	17-JUL-2017	18-APR-2018	Non-Expedited	Not Specified	Not Specified	Astellas	Healthcare Professional	Not Specified	-	17-JUL-2017	18-APR-2018	US	Not Specified	US-ASTELLAS-2017US028586	-	-
1047	104	14452607	Cardiogen-82;Lexiscan	Regadenoson;Rubidium Chloride Rb-82	Diagnostic Procedure;Product Used For Unknown Indication	Hypersensitivity	Non-Serious	Non-Serious	Female	-	29-JAN-2018	Non-Expedited	Not Specified	Not Specified	Bracco	Healthcare Professional	Not Specified	-	19-OCT-2017	29-JAN-2018	US	Not Specified	US-BRACCO DIAGNOSTICS, INC.-2017US04849	-	-
1048	105	14452588	Cardiogen-82	Rubidium Chloride Rb-82	Cardiac Imaging Procedure	No Adverse Event;Wrong Technique In Product Usage Process	Non-Serious	Non-Serious	Not Specified	22-DEC-2016	29-JAN-2018	Non-Expedited	Not Specified	Not Specified	Bracco	Healthcare Professional	Not Specified	-	29-DEC-2016	29-JAN-2018	US	Not Specified	US-BRACCO-014318	-	-
1049	106	14448842	Cardiogen-82	Rubidium Chloride Rb-82	Diagnostic Procedure	No Adverse Event;Expired Product Administered	Non-Serious	Non-Serious	Male	NOV-2017	26-JAN-2018	Non-Expedited	72 YR	Not Specified	Bracco	Healthcare Professional	Not Specified	-	22-NOV-2017	26-JAN-2018	US	Not Specified	US-BRACCO DIAGNOSTICS, INC.-2017US05547	-	-
1050	107	14448826	Cardiogen-82	Rubidium Chloride Rb-82	Diagnostic Procedure	No Adverse Event;Expired Product Administered	Non-Serious	Non-Serious	Female	NOV-2017	26-JAN-2018	Non-Expedited	46 YR	Not Specified	Bracco	Healthcare Professional	Not Specified	-	29-NOV-2017	26-JAN-2018	US	Not Specified	US-BRACCO DIAGNOSTICS, INC.-2017US05548	-	-
1051	108	14447054	Lexiscan;Cardiogen-82	Rubidium Chloride Rb-82;Regadenoson	Diagnostic Procedure	Nausea;Vomiting	Non-Serious	Non-Serious	Female	17-JUL-2017	26-JAN-2018	Non-Expedited	Not Specified	Not Specified	Bracco	Healthcare Professional	Not Specified	-	07-SEP-2017	26-JAN-2018	US	Not Specified	US-BRACCO DIAGNOSTICS, INC.-2017US04169	-	-
1052	109	13473211	Lexiscan	Regadenoson;Aminophylline;Rubidium Chloride Rb-82	Product Used For Unknown Indication	Anaphylactic Reaction	Serious	Other Outcomes	Female	25-MAY-2016	24-APR-2017	Non-Expedited	Not Specified	Not Specified	Astellas	Healthcare Professional	Not Specified	-	26-MAY-2016	24-APR-2017	US	Not Specified	US-ASTELLAS-2016US020840	-	-
1053	110	11969897	Cardiogen-82	Rubidium Chloride Rb-82	Cardiac Stress Test	Product Quality Issue;No Adverse Event	Non-Serious	Non-Serious	Not Specified	08-OCT-2015	26-JAN-2017	Non-Expedited	Not Specified	Not Specified	Bracco	Healthcare Professional	Not Specified	-	11-JAN-2016	28-JAN-2016	US	Not Specified	US-BRACCO-012770	-	-
1054	111	12471733	Lexiscan	Rubidium Chloride Rb-82;Regadenoson;Aminophylline	-	Anaphylactic Reaction	Serious	Other Outcomes	Female	25-MAY-2016	15-DEC-2016	Expedited	Not Specified	Not Specified	Pfizer	Healthcare Professional	Not Specified	-	15-DEC-2016	16-JUN-2016	US	Not Specified	US-PFIZER INC-2016297839	-	-
1055	112	11969900	Cardiogen-82	Rubidium Chloride Rb-82	Positron Emission Tomogram	Exposure To Radiation	Non-Serious	Non-Serious	Female	19-APR-2011	28-JAN-2016	Non-Expedited	76 YR	Not Specified	Bracco	Consumer	Not Specified	-	07-MAY-2015	28-JAN-2016	US	Not Specified	US-BRACCO-012110	-	-
1056	113	11969899	Cardiogen-82	Rubidium Chloride Rb-82	Cardiac Stress Test	Wrong Technique In Product Usage Process;No Adverse Event	Non-Serious	Non-Serious	Not Specified	07-MAR-2015	28-JAN-2016	Non-Expedited	Not Specified	Not Specified	Bracco	Healthcare Professional	Not Specified	Dextrose\Sodium Chloride	09-MAR-2015	28-JAN-2016	US	Not Specified	US-BRACCO-011835	-	-
1057	114	11969889	Cardiogen-82	Rubidium Chloride Rb-82	Diagnostic Procedure	No Adverse Event;Wrong Technique In Product Usage Process	Non-Serious	Non-Serious	Male	02-JUL-2015	28-JAN-2016	Non-Expedited	79 YR	101 KG	Bracco	Healthcare Professional	Not Specified	-	02-JUL-2015	28-JAN-2016	US	Not Specified	US-BRACCO-012347	-	-
1058	115	11969888	Cardiogen-82	Rubidium Chloride Rb-82	Positron Emission Tomogram	Drug Ineffective;No Adverse Event	Non-Serious	Non-Serious	Male	15-APR-2015	28-JAN-2016	Non-Expedited	Not Specified	Not Specified	Bracco	Healthcare Professional	Not Specified	-	16-APR-2015	28-JAN-2016	US	Not Specified	US-BRACCO-011999	-	-
1059	116	10733844	Cardiogen-82	Rubidium Chloride Rb-82	Diagnostic Procedure	Therapeutic Product Effect Decreased	Non-Serious	Non-Serious	Male	29-SEP-2014	28-JAN-2016	Non-Expedited	52 YR	145 KG	Bracco	Healthcare Professional	Not Specified	-	16-JAN-2015	23-JAN-2015	US	Not Specified	US-BRACCO-011391	-	-
1060	117	11681988	Cardiogen-82	Rubidium Chloride Rb-82	Positron Emission Tomogram	Hemiplegia;Dysarthria	Serious	Other Outcomes	Female	09-OCT-2015	06-NOV-2015	Expedited	51 YR	78 KG	Bracco	Healthcare Professional	Not Specified	-	03-NOV-2015	29-OCT-2015	US	Not Specified	US-BRACCO-012802	-	-
1061	118	11205846	Cardiogen-82	Rubidium Chloride Rb-82	Scan Myocardial Perfusion	No Adverse Event;Wrong Technique In Product Usage Process	Serious	Other Outcomes	Not Specified	10-JUN-2015	19-AUG-2015	Expedited	Not Specified	Not Specified	Bracco	Healthcare Professional	Not Specified	Lexiscan	11-AUG-2015	22-JUN-2015	US	Not Specified	US-BRACCO-012269	-	-
1062	119	11205716	Cardiogen-82	Rubidium Chloride Rb-82	Scan Myocardial Perfusion	No Adverse Event;Wrong Technique In Product Usage Process	Serious	Other Outcomes	Not Specified	10-JUN-2015	19-AUG-2015	Expedited	Not Specified	Not Specified	Bracco	Healthcare Professional	Not Specified	Lexiscan	11-AUG-2015	22-JUN-2015	US	Not Specified	US-BRACCO-012267	-	-
1063	120	11205661	Cardiogen-82	Rubidium Chloride Rb-82	Scan Myocardial Perfusion	No Adverse Event;Wrong Technique In Product Usage Process	Serious	Other Outcomes	Not Specified	10-JUN-2015	19-AUG-2015	Expedited	Not Specified	Not Specified	Bracco	Healthcare Professional	Not Specified	Lexiscan	11-AUG-2015	22-JUN-2015	US	Not Specified	US-BRACCO-012268	-	-
1064	121	11205372	Cardiogen-82	Rubidium Chloride Rb-82	Scan Myocardial Perfusion	No Adverse Event;Wrong Technique In Product Usage Process	Serious	Other Outcomes	Not Specified	10-JUN-2015	19-AUG-2015	Expedited	Not Specified	Not Specified	Bracco	Healthcare Professional	Not Specified	Lexiscan	11-AUG-2015	22-JUN-2015	US	Not Specified	US-BRACCO-012266	-	-
1065	122	11205180	Cardiogen-82	Rubidium Chloride Rb-82	Scan Myocardial Perfusion	No Adverse Event;Wrong Technique In Product Usage Process	Serious	Other Outcomes	Not Specified	10-JUN-2015	19-AUG-2015	Expedited	Not Specified	Not Specified	Bracco	Healthcare Professional	Not Specified	Lexiscan	11-AUG-2015	22-JUN-2015	US	Not Specified	US-BRACCO-012265	-	-
1066	123	11129052	Cardiogen-82	Rubidium Chloride Rb-82	Positron Emission Tomogram	Rash;Exposure To Radiation;Psychological Factor Affecting Medical Condition	Serious	Other Outcomes	Male	21-FEB-2011	21-MAY-2015	Expedited	65 YR	Not Specified	Bracco	Consumer	Not Specified	-	07-MAY-2015	21-MAY-2015	US	Not Specified	US-BRACCO-012107	-	-
1067	124	11129036	Cardiogen-82	Rubidium Chloride Rb-82	Positron Emission Tomogram	Fatigue;Alopecia;Exposure To Radiation	Serious	Other Outcomes	Female	24-FEB-2011	21-MAY-2015	Expedited	84 YR	Not Specified	Bracco	Consumer	Not Specified	-	07-MAY-2015	21-MAY-2015	US	Not Specified	US-BRACCO-012108	-	-
1068	125	10945675	Cardiogen-82	Rubidium Chloride Rb-82	Scan Myocardial Perfusion	Wrong Technique In Product Usage Process	Serious	Other Outcomes	Female	11-MAR-2015	23-MAR-2015	Expedited	Not Specified	Not Specified	Bracco	Healthcare Professional	Not Specified	-	12-MAR-2015	23-MAR-2015	US	Not Specified	US-BRACCO-011845	-	-
1069	126	10945650	Cardiogen-82	Rubidium Chloride Rb-82	Scan Myocardial Perfusion	Wrong Technique In Product Usage Process	Serious	Other Outcomes	Male	11-MAR-2015	23-MAR-2015	Expedited	Not Specified	Not Specified	Bracco	Healthcare Professional	Not Specified	-	12-MAR-2015	23-MAR-2015	US	Not Specified	US-BRACCO-011850	-	-
1070	127	10733853	Cardiogen-82	Rubidium Chloride Rb-82	Diagnostic Procedure	Therapeutic Product Effect Decreased	Non-Serious	Non-Serious	Not Specified	29-SEP-2014	23-JAN-2015	Non-Expedited	Not Specified	Not Specified	Bracco	Healthcare Professional	Not Specified	-	29-SEP-2014	23-JAN-2015	US	Not Specified	US-BRACCO-011390	-	-
1071	128	10733849	Cardiogen-82	Rubidium Chloride Rb-82	Diagnostic Procedure	Off Label Use;No Adverse Event	Non-Serious	Non-Serious	Not Specified	19-NOV-2014	23-JAN-2015	Non-Expedited	Not Specified	Not Specified	Bracco	Healthcare Professional	Not Specified	-	19-NOV-2014	23-JAN-2015	US	Not Specified	US-BRACCO-011551	-	-
1072	129	10733848	Cardiogen-82	Rubidium Chloride Rb-82	Diagnostic Procedure	Expired Product Administered;No Adverse Event	Non-Serious	Non-Serious	Not Specified	15-OCT-2014	23-JAN-2015	Non-Expedited	Not Specified	Not Specified	Bracco	Healthcare Professional	Not Specified	-	16-OCT-2014	23-JAN-2015	US	Not Specified	US-BRACCO-011414	-	-
1073	130	10733846	Cardiogen-82	Rubidium Chloride Rb-82	Diagnostic Procedure	Expired Product Administered;No Adverse Event	Non-Serious	Non-Serious	Not Specified	15-OCT-2014	23-JAN-2015	Non-Expedited	Not Specified	Not Specified	Bracco	Healthcare Professional	Not Specified	-	16-OCT-2014	23-JAN-2015	US	Not Specified	US-BRACCO-011413	-	-
[truncated: 17 more rows]
